# Supplementary material for: mTOR inhibition attenuates chemosensitivity through the induction of chemotherapy resistant persisters
Source: Nat Commun. 2022 Nov 17;13:7047. doi: 10.1038/s41467-022-34890-6 (PMC9671908; doi:10.1038/s41467-022-34890-6)
Supplement: Supplementary file 5 — Supplementary Data 1 [file 41467_2022_34890_MOESM5_ESM.xlsx]

## Sheet: Supplementary Data 1a
Supplementary Data 1a. Gene ranking according to β scores in gemcitabine and selinexor screens.
Gene	Gemcitabine_versus_control	Selinexor_versus_control
Med12	4.8147	1.6441
Eed	4.2514	0.71657
Suz12	4.0822	0.7081
Dck	3.8345	-0.041706
Aifm1	3.7781	2.0938
Med10	3.4989	0.95736
Telo2	3.4298	1.2547
Cycs	3.367	1.5177
Prelid1	3.2349	1.4103
Hccs	3.1385	1.4042
Ddx55	3.1333	1.7013
Trrap	3.1153	1.0925
Sars2	3.0974	3.0709
Med24	3.0847	0.50916
Gnb1l	3.0399	1.636
Tamm41	2.9873	1.7931
Eif6	2.9837	1.2478
Polrmt	2.9703	2.5757
Myh9	2.9683	0.33543
Rock2	2.9423	0.337
Kat5	2.9403	0.94736
Dapk3	2.9032	0.38518
Bccip	2.7897	1.1393
Oraov1	2.7838	0.93271
Actl6a	2.699	1.2578
Med23	2.6819	0.60634
Grwd1	2.6815	2.4662
Tufm	2.6738	2.403
Wdr73	2.671	2.32
Rpl15	2.662	2.0506
Ccna2	2.6519	0.26928
Qrsl1	2.6169	2.5993
Srsf7	2.5912	0.37836
Pawr	2.5897	0.22098
Ezh2	2.5888	0.099931
Dohh	2.5547	2.9494
Nhp2	2.5467	1.6703
Timm50	2.5359	1.4796
Prpf19	2.5353	1.1325
Lars2	2.5124	2.3689
Mrpl11	2.5065	2.2606
Ep400	2.4848	0.302
Fars2	2.4648	2.5337
Elp3	2.402	1.8296
Mrpl4	2.3981	2.4845
Triap1	2.3975	1.2182
Tomm22	2.388	0.7473
Hspe1	2.3826	1.9304
Tti2	2.3652	0.89203
Dkc1	2.3493	1.2138
Naa15	2.3373	1.2479
Slc25a26	2.3291	2.9987
Wdr18	2.3252	0.70231
Mrpl53	2.3182	2.2765
Samm50	2.3129	1.1738
Atp2b1	2.312	0.67391
Tpt1	2.3094	1.2415
Atad3a	2.3039	2.3135
Hsd17b10	2.2977	2.4067
Ikbkap	2.2361	1.5039
Fam96b	2.2356	1.2621
Peo1	2.2312	2.161
Aars2	2.2248	2.1669
Trmt112	2.2218	0.73272
Magoh	2.2053	0.5384
Dot1l	2.204	-0.15261
Vrk1	2.2021	2.979
Mrpl52	2.2003	2.1652
Mrps16	2.1968	2.2355
Sbds	2.1919	-0.069567
Mtor	2.1908	1.1296
Ccnc	2.1906	1.043
Riok1	2.1807	1.1726
Rpl17	2.1724	0.99042
Rpl10a	2.1705	0.89236
Mrpl20	2.1596	1.8642
Ddx27	2.1577	1.1997
Mcm5	2.1548	0.82657
Mrpl16	2.1495	1.9571
Urm1	2.1495	1.4254
Rars2	2.1372	2.0169
Mrpl57	2.1368	2.0282
Dhps	2.1363	2.5593
Pak1ip1	2.1321	1.8861
Orc5	2.1316	1.0717
Dis3	2.1314	1.8119
Dnm1l	2.1271	1.5112
Rpl32	2.1262	1.933
Nle1	2.1155	0.68058
Eif1ad	2.1103	2.1805
Mybbp1a	2.1092	1.331
Trub2	2.1035	2.0375
Mrps34	2.0963	1.6292
Defa2	2.0903	0.95381
Mtg2	2.0758	2.2748
Nop10	2.0737	1.3056
Vps25	2.0635	-0.079834
Lztr1	2.0616	-0.42655
Ssbp1	2.0493	2.1934
Eif4e	2.0452	0.89794
Ttc1	2.045	0.7221
Wdr12	2.0437	1.9082
Mars2	2.0384	1.8324
Zbtb8os	2.0341	1.3195
Tomm20	2.031	0.88731
Dap3	2.0231	2.004
Pars2	2.0094	2.2701
Med15	2.0035	0.60347
Elp5	2.0029	1.8802
Tma16	2.0001	1.0175
Pnpt1	1.988	2.3336
Ogt	1.9867	0.93697
Ppp4c	1.9821	2.3467
Myc	1.9814	1.616
Dph3	1.9812	1.8881
Dr1	1.9742	0.96714
Fdxr	1.9712	2.623
Mrps27	1.9687	1.9614
Mrgbp	1.9653	0.052334
Ppil4	1.9529	0.30651
Rplp2	1.9528	0.57824
Max	1.9484	1.4575
Snupn	1.9437	0.039736
Naa20	1.9393	0.54705
Nifk	1.939	1.5472
Rsl24d1	1.9309	1.2696
Cdc7	1.9308	0.64145
Mocs3	1.9286	1.4777
Dbf4	1.9266	0.4298
Wdr61	1.9221	1.6117
Tbca	1.9215	1.9793
Mre11a	1.9188	2.4419
Mrps21	1.9129	1.7919
Emg1	1.9069	1.344
Eral1	1.9047	2.0484
Hspd1	1.8974	1.2673
Gtpbp4	1.8907	1.2365
Wdr77	1.8754	2.2292
Gnl2	1.8726	0.92681
Med16	1.8715	-0.067633
Mbd2	1.8704	0.12025
Gpi1	1.8559	1.2227
Tomm40	1.8488	0.74566
Birc5	1.8456	0.52289
Nudcd3	1.8436	1.6439
Nrf1	1.8279	0.4718
Adat2	1.8254	2.5164
Casp9	1.8229	0.40758
Xpo1	1.8227	-0.86493
Ddx56	1.8225	0.89428
D2Wsu81e	1.8116	0.86444
Nsun4	1.7969	2.042
Rpl18	1.7954	1.8608
Brpf1	1.7922	0.22159
Mrpl43	1.788	1.6156
Dbr1	1.7826	0.96883
Mrpl12	1.7735	1.4883
Sox4	1.7728	-0.23018
Men1	1.7728	-0.32954
Pyroxd1	1.7705	0.93499
Myl6	1.7682	-0.14744
Rps7	1.7662	1.1296
Nrde2	1.762	0.35308
Copa	1.7605	0.78157
Nf1	1.7566	-0.27829
Myl12a	1.7559	-0.23478
Kmt2a	1.7514	0.22085
Dhx33	1.7513	0.85004
Chchd4	1.7434	0.76082
Gfer	1.7417	0.81401
Rpl31	1.7403	1.2759
Aamp	1.7395	1.0171
Metap1	1.7388	1.5298
Smc1a	1.7381	1.3962
Timm9	1.7363	1.2765
Dmap1	1.7349	0.6461
Tefm	1.7309	1.7763
Mrps33	1.7289	1.6948
Nelfcd	1.7269	1.1735
Rpl28	1.7255	1.5402
Thoc3	1.7172	0.40663
Mrpl55	1.7143	1.7361
Mrpl42	1.7126	1.3298
Abce1	1.7065	0.45218
Mrpl46	1.703	1.8615
Las1l	1.7024	1.0291
Wdr74	1.7012	0.61223
Trim28	1.7012	0.51655
Mrpl39	1.6975	1.7137
Nat10	1.6908	1.4271
Cirh1a	1.6903	0.99446
Aasdhppt	1.6845	1.4567
Rfwd2	1.684	0.18375
Rpl11	1.6807	0.57855
Elp6	1.6793	1.3806
Prpf8	1.6766	1.2188
Apaf1	1.6716	0.3022
Dars2	1.669	1.734
Wbscr16	1.6658	1.8171
Imp4	1.6615	0.94352
Hbs1l	1.6606	0.29782
Uba2	1.6578	-0.16307
Rpl29	1.652	1.5959
Tfam	1.6458	1.3314
Vps13d	1.6449	0.27189
Tuba1c	1.6444	0.3421
Foxa2	1.6401	0.63621
Uba52	1.6371	1.1478
Nsa2	1.6367	1.0716
Mrpl15	1.6356	1.669
Mrpl17	1.6313	1.566
Rpl37a	1.6307	1.0829
Huwe1	1.6238	0.068792
Btaf1	1.6202	0.35564
Ruvbl2	1.6134	0.38184
Tfb2m	1.6066	1.1984
Exosc10	1.6066	1.1301
Noc4l	1.6063	0.85846
Med19	1.603	0.5172
Rtcb	1.6016	1.2609
Mrps2	1.5978	1.3718
Srsf10	1.5927	0.24012
Fbxw7	1.5926	-0.96021
Bop1	1.5892	1.0361
Sdad1	1.5836	0.76532
Snrpg	1.5816	0.15861
Yars2	1.5803	1.4291
Snapc5	1.579	0.80054
Mrpl23	1.5737	1.7403
Mrps25	1.5724	1.5814
Med1	1.5626	0.14478
Ddx54	1.5604	1.1834
Rps25	1.5592	1.4466
Rps26	1.5592	0.93536
Snrnp40	1.5586	0.83797
Elac2	1.554	1.0411
Myl12b	1.5538	0.2288
Rpl14	1.5511	1.4052
Prmt5	1.551	2.4609
Nars2	1.5479	1.5958
Med9	1.543	0.35589
Srsf1	1.5376	0.48755
Rpl6	1.5365	0.94763
Rpl7l1	1.5334	1.0671
Med20	1.5285	0.34061
1810026J23Rik	1.5275	0.82291
Rps19	1.5275	0.43308
Ddx49	1.527	0.81909
Mrpl28	1.5243	1.3448
Ctu2	1.5218	1.0921
Rps27	1.5164	1.9717
Utp15	1.5131	1.0456
Prmt1	1.5106	0.9953
Prkrir	1.5083	1.4847
Uqcrc1	1.505	0.98505
Eif2s3x	1.5045	0.11671
Orc4	1.5035	1.0311
Mrpl41	1.5008	1.4616
Yeats4	1.5001	1.4932
Gm10406	1.4993	0.74852
Nudt21	1.4969	0.96666
Timm13	1.4953	1.7542
Pgs1	1.4946	2.1672
Nelfb	1.4927	1.3112
Lsg1	1.4901	0.9799
Mrpl38	1.4808	1.4979
Prpf38a	1.4787	1.0025
Mtx2	1.477	0.88899
Brd4	1.4747	0.83135
Hinfp	1.4733	1.8033
Tars2	1.4686	0.94104
Med4	1.4679	0.14556
Mcm3	1.4609	0.55131
Rpf2	1.4607	0.89767
Snrnp25	1.4578	0.029905
Mbtps1	1.4562	1.7393
Supv3l1	1.4544	1.7789
Med13	1.4527	0.69901
Lonp1	1.4511	1.7853
Rptor	1.4508	0.77159
Srrm1	1.4506	0.43854
Seh1l	1.4491	0.55827
Hmgb1	1.4457	0.85565
Timm10	1.4422	1.0044
Ftsj3	1.4401	0.65174
Mrpl54	1.44	1.5722
Med29	1.4391	0.13509
Iars2	1.4382	1.2806
Gfm1	1.4371	1.5144
Usp7	1.4367	-0.10251
Cul2	1.4315	1.6993
Mms19	1.4307	1.1334
Wbscr22	1.4276	0.49681
Rpl36a	1.4272	1.9497
Cmtr1	1.4271	1.3263
Mrpl3	1.4243	1.2748
Cinp	1.4229	0.8642
Ube2l3	1.4225	0.64399
Fen1	1.4218	2.5073
Rpl35a	1.4205	0.94883
Rpl19	1.42	0.39661
Ipo13	1.4195	0.031834
Cct8	1.4163	1.4495
Mrpl44	1.4154	1.3231
Romo1	1.4136	2.1506
Crnkl1	1.4132	0.53966
Mrps6	1.4086	1.3884
Mrpl47	1.4029	1.3083
Dnajc11	1.401	1.194
Gemin2	1.3987	0.97874
Rpl36	1.3981	1.1847
Rpl21	1.3979	0.76644
Mcm2	1.3883	0.79233
Uba3	1.3756	0.2552
Pabpc1	1.3746	1.4519
Dis3l	1.3738	1.3696
Ddx42	1.3723	1.2588
Mrps26	1.3713	1.1739
Cars2	1.3709	1.1202
Rpl35	1.3685	0.98562
Pdpk1	1.3666	0.62722
Ctu1	1.3622	1.1822
Phb	1.3605	1.1554
Rsl1d1	1.3601	0.53168
Wars2	1.3588	1.4481
Pkm	1.3578	1.5154
Mtch2	1.3576	0.53536
Msto1	1.3574	1.372
Dctn5	1.3528	1.457
Elp2	1.3524	1.0357
Yars	1.352	0.29996
Mtrf1l	1.3514	0.89456
Srsf2	1.3514	0.56693
Meaf6	1.3483	0.22975
Hmgcs1	1.3452	0.28689
Med14	1.344	0.61213
Pmpca	1.3409	0.54866
Kars	1.3399	0.65773
Lsm11	1.3395	1.4115
Dcaf13	1.3391	0.58733
Ppp2r3c	1.3379	0.81659
Slc2a1	1.3377	1.0861
Cct7	1.3362	1.0718
Znhit6	1.3295	0.97491
Toe1	1.3282	0.15293
Eftud1	1.3276	0.15938
Taok1	1.3252	0.088406
Letm1	1.3192	0.94448
Mrpl49	1.3142	1.2166
Mipep	1.3115	1.5961
Ciao1	1.3106	0.78639
Gins2	1.3101	0.55248
Rnf2	1.3089	-0.29658
Krr1	1.3083	0.74249
Dph5	1.308	1.0064
Kat6a	1.308	0.17988
Cenpw	1.3061	0.21531
Tcp1	1.3054	1.2719
Eif3i	1.3045	1.3582
Polr2b	1.3034	0.65275
Cfap20	1.3019	0.23567
Det1	1.2996	0.1005
Rps28	1.2965	1.5254
Vhl	1.2943	1.3312
Pet117	1.2929	0.95882
Zbtb7a	1.2927	0.10799
Mrps17	1.2904	1.2647
Snrpf	1.2863	1.8399
Vars2	1.285	1.4079
Rplp0	1.2825	1.0657
Polg2	1.2807	1.6699
Crls1	1.2789	0.98763
Mrpl2	1.2787	1.1867
Rrp9	1.278	1.02
Rcl1	1.2777	0.98143
Tfdp1	1.2748	0.56651
Wdr83	1.2746	1.5149
Mrps11	1.2742	1.2407
Rpl9	1.2733	0.65776
Mrpl35	1.2653	1.1279
Imp3	1.2646	0.79621
Ipo7	1.2639	1.1072
Ythdf2	1.2629	0.034433
Adat3	1.2609	2.1031
Cct2	1.2592	1.1103
Rpl24	1.2587	1.1112
Yeats2	1.2575	0.89854
Prpf38b	1.2573	0.68827
Mrpl14	1.257	1.383
Smc3	1.2564	0.55384
Cdk7	1.2563	0.051982
Uqcc2	1.2551	0.8825
Exosc8	1.2547	0.53125
Exosc2	1.253	0.5739
Olfr596	1.252	0.097757
Slc35b1	1.2518	1.0216
Cenpo	1.2487	0.9283
Nip7	1.2464	0.93913
Tfb1m	1.246	1.3797
Uqcc1	1.2445	0.78254
Mettl14	1.2413	0.21616
Mios	1.2395	1.2968
Mrps15	1.2372	1.147
Gars	1.2329	0.16619
Hscb	1.2325	0.88416
Wdr36	1.2289	0.64993
Rpl12	1.225	1.045
Atp5a1	1.2235	1.7156
Rpl36al	1.2232	1.8771
Polr3f	1.2225	0.72296
Slc30a9	1.2201	1.3733
Nckap1	1.2186	0.23946
Orc6	1.2176	0.67058
Rrp12	1.2165	0.22564
Mrpl9	1.2148	1.1231
Uqcr10	1.2141	0.97553
Mtif2	1.2103	1.0531
Rbbp5	1.2093	0.74818
Pop5	1.209	0.63884
Tbcb	1.2078	0.94232
Mrpl48	1.2076	1.3895
Urb2	1.2066	1.0397
Opa1	1.2039	1.4158
Heatr1	1.2037	0.69308
Tsfm	1.2017	1.3127
Mtpap	1.1992	1.3635
Oip5	1.199	0.53611
Mcmbp	1.1985	0.65542
Mrpl33	1.1983	1.179
Atp5b	1.1974	1.1864
Ppwd1	1.1958	0.96303
Snrnp35	1.1958	-0.068172
Rpusd4	1.1914	1.0766
Ttc4	1.1879	1.6312
Etf1	1.1852	0.47459
Dnaaf5	1.182	1.443
Gins4	1.1769	0.32385
Ppan	1.1759	0.80942
Hk2	1.1748	0.73866
Ssb	1.1725	1.0385
Thg1l	1.1676	1.2494
Mcm4	1.1666	0.84691
Sec61a1	1.1663	0.35349
Smarca5	1.1659	0.39297
Slc25a46	1.1649	0.60431
LOC100861615	1.1615	0.26352
Wdr43	1.1587	0.62186
Alyref	1.1572	0.35648
Rpl7a	1.1547	1.1021
Tfrc	1.1521	1.1734
Nop9	1.152	0.61319
Brd8	1.1498	0.21604
Chaf1b	1.1487	0.16556
Hspa9	1.1485	0.74002
Taf6l	1.1453	-0.43628
Polr2g	1.143	0.60078
Mis18a	1.1377	0.71518
Cenpm	1.1357	0.60251
Cdk9	1.1347	0.49303
Drap1	1.134	0.57531
Syncrip	1.1335	-0.18085
Nae1	1.131	0.66691
Jag1	1.1302	0.038573
Mrpl10	1.1295	1.2104
Cops5	1.1283	0.62754
Hist1h3e	1.1256	1.6525
Pwp2	1.1247	0.73583
Git1	1.1234	0.048241
Mrps14	1.1224	1.122
Wdr25	1.1214	1.1342
Nfs1	1.1213	0.73707
Skiv2l	1.1209	0.85238
Rraga	1.1204	0.79225
Rfc2	1.1163	1.4192
Mkl2	1.1162	-0.08303
Olfr606	1.1155	0.032162
Mrps5	1.1142	0.97867
Ebna1bp2	1.1132	0.81112
Mak16	1.1124	0.99257
Tada3	1.1121	0.46421
Gtf2h5	1.1076	0.27998
Eif2ak2	1.107	0.029106
Tada1	1.1059	-0.2857
Pdcd11	1.1057	1.1456
Rpl8	1.105	1.5849
Cebpz	1.1036	0.56381
Slmo2	1.0998	0.78419
Polr2k	1.0992	0.69731
Cct5	1.099	1.0903
Nop16	1.0962	0.52009
Pelo	1.0961	-0.41164
Rps13	1.0941	1.1511
Mtg1	1.0931	1.1802
Rae1	1.0926	-0.043992
2700062C07Rik	1.09	1.0725
Esf1	1.0883	0.71113
Snrpd1	1.0864	1.0876
1810013L24Rik	1.0855	-0.33972
Ddx52	1.0844	0.83156
Atxn10	1.0842	0.25259
Mta2	1.0841	0.26623
Uqcrc2	1.0832	1.0061
Ddx28	1.0828	1.0291
2010107E04Rik	1.0821	0.8305
Stat3	1.0816	0.23144
Mrps12	1.0813	1.4542
Olfr597	1.0812	0.17791
Diexf	1.0801	0.76305
Dnm2	1.0793	1.3626
Tbp	1.0789	0.30076
Mrpl22	1.0783	1.1943
Rpl4	1.0777	0.80189
Ccnd1	1.0763	0.83063
Coa6	1.0753	0.79385
Ept1	1.0746	-0.016814
Abt1	1.0743	0.63523
Ldha	1.074	2.1359
Mrpl40	1.0735	1.5167
Hist1h2ag	1.0724	0.7233
1110008L16Rik	1.0722	1.2386
Lsm10	1.0713	1.0868
Ctcf	1.069	0.41858
Tuba1a	1.0673	0.81558
Nmd3	1.0637	0.41792
Nop58	1.0632	0.82456
Mrpl19	1.0628	1.047
Psmc2	1.0609	0.17599
Sco2	1.0608	0.85769
Tomm70a	1.0543	0.70686
Smc4	1.0512	0.83106
Yae1d1	1.0512	0.52246
Gm17019	1.0507	0.56671
Aurka	1.0483	0.26598
Kif11	1.0469	0.17043
Pdcd2	1.0461	0.49827
Olfr553	1.046	0.14687
Trmt61a	1.0448	1.4102
Atp6v1e1	1.0442	0.6893
Map4k4	1.0423	0.040508
Adck4	1.0419	0.75416
Onecut2	1.0407	0.024201
Uxt	1.0404	0.61897
Ect2	1.0381	0.56124
Prpf3	1.0356	0.56528
Mrpl45	1.0351	1.0722
Zbtb2	1.0329	0.2553
Ddx18	1.0328	0.4365
Eif2b2	1.032	0.15832
Tmod3	1.0316	-0.024627
Tpx2	1.0293	0.51258
Rps15	1.0284	1.1516
Sf3b6	1.0264	1.4247
Gm5796	1.0235	0.59397
Dctn6	1.0232	1.4121
Nipbl	1.0232	1.0641
Nol10	1.0198	0.72697
Mrps30	1.019	1.0505
Uhrf1	1.0186	0.085413
Psma5	1.0177	0.56621
Pigw	1.0164	0.23333
Gm12886	1.0158	0.098055
Urb1	1.0154	0.38461
Gtf3c4	1.0111	0.5427
Med27	1.011	0.34021
Mrps18a	1.0109	1.0914
Pmpcb	1.0108	0.2126
Rnf20	1.0088	1.1519
Lrrc46	1.0053	0.15768
Ndufaf7	1.0033	0.31831
Top3a	1.002	0.6568
Pold1	1.002	0.20935
Mrpl27	1.0008	1.1328
Lamtor3	0.99909	0.78693
Ptbp1	0.99751	0.50522
Mrps7	0.99694	0.85624
Lsm12	0.99177	0.10569
Rps14	0.9888	-0.10503
Cbfb	0.98838	0.62295
Mapk14	0.9869	0.42923
Mapre1	0.98539	0.50685
Mrpl37	0.98446	0.97987
Trmt6	0.98397	1.0582
Mrpl18	0.98397	0.90114
Uqcrb	0.98114	0.88086
Usmg5	0.98058	0.67482
Zfat	0.98016	0.11474
Rps23	0.97979	1.2839
Ube3a	0.97626	-0.033226
Gmps	0.97553	1.1869
Psmg3	0.97001	0.57608
Rad50	0.96961	2.0215
Tars	0.96877	0.75172
Cox10	0.96586	0.75985
Polr2d	0.96397	0.92369
Skp2	0.96364	0.2286
Cdc45	0.962	0.61046
Taf1c	0.96078	0.6792
Zpr1	0.96048	0.56484
Snrpd2	0.95978	1.4711
Tada2a	0.95935	1.2248
Mrps10	0.95845	0.55622
Dph2	0.95839	0.87392
Elp4	0.95742	0.60405
Tubb5	0.95658	0.70798
Pgam1	0.95049	1.6139
Ints1	0.94965	0.00071345
Rpl7	0.9489	1.1259
Plekhg3	0.94855	0.064496
Coq6	0.94793	0.69798
Ncbp1	0.94767	0.54052
Grpel1	0.94668	0.58777
Mrpl32	0.94593	0.63398
Tyms	0.94453	1.6625
Mettl16	0.94239	0.39696
Hnf1b	0.94146	0.15486
Mterf4	0.94092	0.91054
Ddx3x	0.94006	0.23876
Phb2	0.93892	0.98841
Prkrip1	0.93656	0.76153
Hmgn2	0.93533	0.24075
Bcl2l11	0.93495	0.31414
Rex2	0.9326	0.85618
Trmt10c	0.93209	1.0661
Olfr635	0.932	0.13938
Noc3l	0.93164	0.50621
Cd164l2	0.93162	0.063946
Orc3	0.93157	0.65996
Cct4	0.9302	0.83898
Ftsj2	0.92986	0.67518
Mrps35	0.92981	0.81887
Rnf40	0.92938	1.0851
Pisd	0.92869	0.44203
Cyc1	0.92789	0.68715
Axin1	0.92677	0.053945
Fosl1	0.92667	0.38197
Atp6v1g1	0.92641	0.63617
Rasa1	0.92521	-0.040022
Malsu1	0.92429	0.86
Set	0.92338	0.43424
Arih1	0.92334	0.23233
Ybey	0.92314	0.99794
Trnt1	0.92177	0.59355
BC052040	0.92111	1.3999
Cwc25	0.92094	0.41202
Ttc27	0.9193	0.48906
Nhp2l1	0.9187	0.076851
Mllt1	0.91751	0.11774
Olfr707	0.91735	0.091582
Mup8	0.91553	0.45781
Sbno1	0.91526	0.59239
Gm561	0.91385	0.4385
Usp17la	0.91351	0.18338
Gins1	0.91283	0.30087
Nup214	0.91262	0.13338
Fam98b	0.91155	1.6215
Gmppb	0.91137	0.40814
Kdm8	0.91057	0.7502
Dhfr	0.91044	1.6651
N6amt1	0.91039	1.1036
Wdr1	0.90851	1.5883
Lsm8	0.90724	0.79894
Mcat	0.90652	1.3696
Smc2	0.9057	0.59596
Rps27rt	0.90537	0.9682
Fdps	0.90232	0.629
Mrpl36	0.89942	1.0125
Hnrnpf	0.89836	0.35566
Csnk2b	0.89774	0.94615
Nol6	0.89757	0.65082
Prim2	0.8973	0.58123
Utp23	0.89716	0.44528
Oxsm	0.8968	1.2435
Med17	0.89604	0.076531
Rragc	0.89375	0.46782
Mfap1a	0.89366	0.54649
Pes1	0.89285	0.65252
Snapc1	0.89119	0.27389
Fcf1	0.88976	0.7629
Lamtor1	0.88937	0.44765
Ndufb9	0.88738	0.41437
Polr2c	0.88704	0.42588
Rpsa	0.8856	0.79894
Mis18bp1	0.88507	0.60748
Dars	0.88485	0.14206
Fam210a	0.88413	0.61898
Spns1	0.88336	-0.050589
Cnot3	0.88305	-0.24044
Actb	0.88297	0.94229
Mcrs1	0.88052	0.31789
Ap2s1	0.87979	0.49101
Nup160	0.87914	0.0062072
Psma6	0.8764	1.6059
Ubp1	0.87492	-0.43527
Nup133	0.87427	-0.08531
Surf6	0.87341	0.79717
Wdr24	0.87127	0.75077
Yrdc	0.87056	0.61638
C1d	0.86731	0.75772
Cox7b	0.86704	0.62249
Cox17	0.8667	0.67051
Cops6	0.86592	0.47317
Exosc1	0.86501	0.53639
Atp5h	0.86331	0.96927
Kti12	0.8632	0.87882
Snrpd3	0.86157	1.0253
Nop2	0.86138	0.58395
Stard7	0.86127	0.61241
Ccdc101	0.86031	-0.25109
Gm4559	0.85897	0.30096
Olfr243	0.85797	0.094033
Vmn2r35	0.8578	0.44849
Taf5l	0.85696	-0.32521
Pttg1	0.85623	0.18346
Lsm5	0.85295	0.26266
Rbm47	0.85218	0.33384
Usp30	0.85059	0.17098
Capzb	0.84877	1.2064
Htatsf1	0.84864	0.42401
Ndufa1	0.84829	0.51648
Nutf2	0.84666	0.22262
Pfn1	0.84618	-0.024162
Usb1	0.84576	1.3778
Rpusd1	0.8457	-0.045903
Lsm6	0.8456	0.83593
Gas7	0.84471	0.042378
Stk40	0.84464	0.031806
Gm11711	0.84349	0.2406
Dnajc5	0.84334	0.18886
Rnpc3	0.84323	0.19905
Taf12	0.8432	0.37333
Mfap1b	0.84311	0.54053
Sco1	0.8425	0.79522
D8Ertd738e	0.84241	0.97933
Cic	0.84183	-0.0017191
Sae1	0.841	0.38252
Sumo2	0.84098	0.29119
Cwf19l1	0.84077	1.4722
Vmn2r32	0.83984	0.44004
Stk33	0.83637	-0.030625
Eef1g	0.83615	0.13579
Atpaf2	0.83576	1.1893
Ddx21	0.83392	1.3199
Klhdc10	0.8334	0.0033259
Dph6	0.83331	1.3035
Rbmx2	0.83191	0.53311
Rpl39	0.82887	1.3777
Nf2	0.82871	-0.25465
Krtap5-3	0.82839	0.56753
Olfr582	0.82835	0.12522
Ruvbl1	0.82735	0.058707
Fbrs	0.82625	0.10835
Aoc3	0.82594	0.045685
Fastkd5	0.82587	0.70816
Mcm7	0.82577	0.78093
Coa5	0.82525	0.60135
Gatb	0.82521	0.71913
Psma4	0.82518	0.83353
Nxf1	0.82384	-0.3322
Mrpl13	0.82329	0.91612
Ubr5	0.82325	-0.079124
Ell	0.82304	0.64383
Cox5b	0.82292	0.14723
Hist1h3a	0.82151	1.1228
Gja1	0.82148	-0.042111
Eif3a	0.82074	1.0758
Vmn1r117	0.82035	0.16292
Stk17b	0.82021	-0.0063999
Prpf40a	0.81992	0.4962
Naf1	0.81858	0.41974
Actr6	0.81827	1.5459
Ptcd1	0.81824	1.1176
Copb1	0.81701	0.77643
Sf3a1	0.81552	0.65815
Tex16	0.81499	0.043818
Sfswap	0.8146	-0.09593
Eaf1	0.81424	0.43698
Cwc22	0.81389	0.23716
Glrx5	0.81293	0.97534
Map2k6	0.81289	0.32066
Coq5	0.81247	0.6399
Exosc9	0.81234	0.54437
Spata5	0.81075	0.45765
Rpl37	0.81049	0.94196
Nom1	0.80939	0.60491
Cdipt	0.80922	0.95006
Vprbp	0.80866	0.96831
Cox6c	0.80835	0.60634
Mrpl24	0.80833	0.62203
Rpl23	0.80714	0.58379
Actr2	0.80697	0.76457
C330007P06Rik	0.80556	1.1846
Tbcd	0.80204	0.39453
Mrps28	0.80195	0.85303
Rrp15	0.80195	0.66175
Rps11	0.80192	0.70472
Rpl23a	0.80134	0.94283
Luzp1	0.8007	0.0093245
Ppil1	0.80037	0.57463
Ndufb5	0.79999	0.30036
Dip2c	0.79982	0.0073248
Zbtb46	0.79953	0.10984
Shroom4	0.79853	0.094149
Sf3b4	0.79825	0.90826
Psmc5	0.79772	0.79899
Rnmtl1	0.79643	0.56712
Mdn1	0.79444	0.68943
Hnrnpa1	0.79403	0.056443
Mrpl34	0.79337	0.72474
Psmg2	0.79303	1.1477
Coq4	0.79255	0.59193
Ccdc137	0.79195	0.38965
Snw1	0.79193	0.24549
Ska2	0.79159	1.0489
Mrpl51	0.79141	0.68286
Vmn2r38	0.79128	0.54533
Uqcrq	0.79102	0.72599
Naa25	0.79099	0.47746
Haus8	0.7909	0.59261
Ccnh	0.79007	0.25476
Mga	0.78997	0.19433
Gm4297	0.78968	0.17242
Zim1	0.78788	0.092484
Gapdh	0.78524	0.40872
Rpl13	0.78438	1.2496
Eef2	0.7837	1.0004
Gtf2h4	0.78334	0.47699
Utp18	0.7833	0.40915
Hipk1	0.7831	0.10991
Samhd1	0.78287	0.096924
Sub1	0.78259	0.34904
Chd4	0.78233	0.85116
Wdr82	0.78059	1.0308
Ptcd3	0.78044	0.87194
Dynlt1a	0.77995	0.062575
Pgd	0.77918	0.58938
Atxn2l	0.77875	-0.11788
Cdk11b	0.77868	0.43628
Atp5c1	0.77865	0.64506
Cdc123	0.77793	0.61629
Zdhhc17	0.77774	0.03792
Ing5	0.77649	0.08939
Cherp	0.77615	0.34699
Rtn4ip1	0.77594	0.51137
Skp1a	0.77579	0.57709
Cox7c	0.77567	0.32682
Nop56	0.77442	0.73694
Olfr1371	0.77378	0.40551
Olfr403	0.77358	0.17861
Rprd1b	0.77195	0.74383
Olfr700	0.77151	0.10334
Rbm19	0.76973	0.37267
Pfkl	0.76809	0.30236
Plk1	0.76591	0.33034
Wdr3	0.76578	0.55475
Usp36	0.7646	0.37
Mto1	0.76452	0.40363
Exosc4	0.76449	0.28393
Lage3	0.76351	0.32502
Gtpbp3	0.76323	0.45182
Kif18b	0.76144	0.95455
Pafah1b1	0.7596	0.46271
Taz	0.75752	0.76262
Skiv2l2	0.75647	0.39113
Ykt6	0.75637	0.20031
Exosc7	0.7556	0.23173
Zfp207	0.75413	0.40905
Chuk	0.75336	0.28771
Fto	0.75222	0.51979
Coa7	0.75053	0.83667
Adcy3	0.75046	0.059027
Mrfap1	0.75007	0.10937
Sf3b1	0.74765	0.58623
Cactin	0.74717	0.63549
Vmn1r114	0.74706	0.30936
Ggps1	0.74578	1.0682
Usp5	0.74557	0.077818
Cryba1	0.74522	0.19903
Rps6kb1	0.74495	0.11505
Ndufs8	0.74371	0.22924
Cox19	0.74338	0.6674
Dimt1	0.7431	0.61744
Olfr395	0.74271	0.075055
U2surp	0.74255	0.27453
Scgb1b7	0.74249	0.29119
Atp5j2	0.74227	0.95223
Tsr3	0.74136	-0.081243
Ndufs7	0.74098	0.33084
Ehbp1	0.74075	0.14042
Racgap1	0.74056	0.47268
Slc16a1	0.74011	0.50936
Kif6	0.7397	0.0013449
Gnl3	0.73966	0.9477
Ccnl1	0.73965	0.32305
Gm14440	0.73914	0.69087
Bod1	0.73787	0.047495
Slc7a6os	0.73778	-0.59788
Tomm7	0.73773	0.29174
Hnrnph1	0.7377	0.089404
Ndufs1	0.73759	0.41926
Hnrnpu	0.73736	0.53647
Ndufa8	0.7367	0.36037
Mrps24	0.73541	0.87251
Lrpprc	0.7354	0.48298
Acly	0.73492	0.96428
Pik3c2a	0.73481	0.13453
Mcm10	0.7346	0.41313
Ddx20	0.732	0.26234
Lyrm4	0.72978	0.23787
Utp20	0.72973	0.55933
Ppp2r4	0.72968	0.72459
Rpl26	0.729	0.87316
Ndufc2	0.72873	0.31646
Lamtor2	0.72871	0.51704
Trim30d	0.7286	-0.008288
Rps3	0.72763	0.70398
Nhlrc2	0.72711	1.1986
Tjp1	0.72679	-0.0031381
Ndufa13	0.72617	0.34231
Cox6b1	0.72543	0.40668
Dhx30	0.72503	0.55059
Apopt1	0.72477	0.12953
Snrpb2	0.72425	-0.51896
Wdr5	0.7239	1.4902
Gm20767	0.72381	0.36573
Olfr549	0.72347	-0.0079222
Smc6	0.72335	0.87473
Klf13	0.72254	0.18143
Rbm8a	0.72241	0.54207
Mrps18c	0.72234	0.80562
Haus2	0.72216	0.28515
Lsm2	0.72181	1.1814
Gm5148	0.72129	1.2158
Tgif1	0.72015	0.91015
Eftud2	0.71998	1.3921
Ndufa11	0.71966	0.23984
Csrp2bp	0.71925	0.36642
Asic1	0.71896	-0.031709
Aasdh	0.71745	0.1071
Pfas	0.71664	0.34961
Noa1	0.71577	0.72949
Rps4x	0.71544	1.1727
Rybp	0.71544	-0.2052
Isca1	0.71502	0.68129
Adh7	0.71377	0.42889
Pin1	0.7127	0.40868
Fbxo11	0.71192	-0.15661
Sept9	0.7114	0.0090309
Mup9	0.71049	0.58369
Uqcrfs1	0.70936	0.4807
Hectd1	0.70891	0.33952
Psmd2	0.70755	0.65805
Gm2897	0.70625	0.81519
Caprin1	0.70466	-0.056094
Gfm2	0.70397	1.0981
Vmn1r65	0.70346	0.059963
Ccdc51	0.70322	0.37751
BC005624	0.70292	0.45708
Ddx59	0.70284	0.78518
Cd2bp2	0.70252	0.30227
Neurl1b	0.70122	-0.010421
Cars	0.70048	0.19891
Sertad2	0.69922	-0.0021268
Twistnb	0.69877	0.32056
Zcrb1	0.69836	-0.03562
Gmeb2	0.69816	0.093332
Pelp1	0.69701	0.44797
Gemin8	0.69699	0.45748
Trap1a	0.69686	-0.096626
Ptch2	0.69385	0.0018299
Setd1b	0.69345	0.20347
Lamtor4	0.69299	0.51659
Pet100	0.69288	0.37768
Atp5e	0.69274	0.50623
Ccdc174	0.69188	-0.016281
Rps2	0.69165	0.60838
Lig3	0.69164	1.1588
Mrpl30	0.69138	0.77845
Timm22	0.69114	0.58543
Vdac1	0.69095	0.44136
Cenpq	0.69029	0.5937
Haus3	0.68977	0.15801
Smu1	0.68875	0.83602
Rpia	0.68861	1.0022
Ctdnep1	0.68852	-0.047626
4931431F19Rik	0.68805	0.019183
Bak1	0.68773	0.3165
Bms1	0.68746	0.31959
Utp6	0.68731	0.61725
Psmb8	0.6862	-0.0016423
Farsb	0.68511	0.5827
Rgp1	0.68494	0.16269
Bcl10	0.68476	0.14371
Alox12	0.68413	0.046025
Tfpi	0.68411	0.1034
Mtch1	0.68393	0.13641
Nufip1	0.68206	0.42009
Stil	0.68066	0.66172
Iba57	0.67991	0.61328
Bcl6b	0.67977	0.09605
Slc25a51	0.67969	0.15803
Cox16	0.67922	0.48498
U2af2	0.67913	0.2501
Rangrf	0.67868	0.21158
Gm15319	0.67576	0.30162
Eif2b1	0.67551	0.46869
Cnga4	0.67523	0.05741
Rab18	0.67462	0.19486
Krtap5-5	0.67417	0.17538
Trit1	0.67401	0.69262
Trp53rk	0.67348	0.67367
Olfr494	0.67309	0.15905
Tpi1	0.67302	1.2034
Rps17	0.67134	1.1397
Ift20	0.67107	0.045035
Flii	0.67055	0.34766
C1qbp	0.67042	0.70576
Sin3b	0.66962	0.21602
Rps18	0.66903	1.1754
Ints2	0.669	0.32881
Med31	0.66792	0.40998
Lsm3	0.6677	0.53183
Foxe1	0.66765	-0.060201
Hmgxb3	0.66361	0.22744
Cenpp	0.66332	0.58184
Naa50	0.66299	0.51527
Olfr1386	0.66223	0.28967
Usp22	0.66221	-0.18178
Rock1	0.66183	-0.005292
Hist3h2ba	0.66166	0.45469
Olfr622	0.66132	0.088083
Cttnbp2nl	0.66121	0.023708
Fech	0.65954	0.1358
Vbp1	0.65931	0.82107
Hist2h3b	0.6587	1.4101
Pds5b	0.65868	-0.069035
Ticrr	0.65743	0.028623
Eif4enif1	0.65683	0.27546
Tbl3	0.65671	0.44257
Rnaseh1	0.65649	1.0928
Cox18	0.65648	0.40815
Med7	0.65628	0.2376
Psmc1	0.65618	0.45161
Rab40c	0.65599	-0.16209
Ndufa6	0.65528	0.34346
Rbm28	0.65519	0.52448
Sf3b5	0.65394	0.23329
Gatc	0.65305	0.75343
Prpf18	0.65276	0.30224
Bub3	0.65204	0.25175
Ngrn	0.65157	0.38004
Nuak2	0.65118	0.03346
Suv420h1	0.65064	-0.13381
Cltc	0.64941	0.90784
Usp39	0.6493	0.3094
Rrm1	0.64928	-0.33693
Timm10b	0.64902	0.19133
Olfr809	0.64872	0.31115
Olfr612	0.6467	-0.040401
Wasl	0.64658	0.00030574
Eapp	0.64645	0.58038
Gins3	0.64629	0.212
Ncapg	0.64625	1.0059
Mybl2	0.64624	0.21205
Zfp553	0.64595	0.0072352
Wbp1	0.64387	0.045377
Srsf3	0.64356	0.70624
Ttf2	0.64346	1.2236
Metap2	0.64156	1.2713
Zbtb24	0.64141	1.2518
Cox15	0.6406	0.65655
Ubc	0.63979	0.55567
Wrap53	0.63941	0.81812
Gtf3a	0.63888	0.49745
Cops2	0.63816	0.28081
Psmd3	0.63809	0.85738
Pi15	0.6377	0.1711
Cttn	0.63711	0.13482
Ngdn	0.63685	0.17775
Gemin7	0.63672	0.5495
Strn4	0.63656	0.024695
Rhoc	0.63522	0.13231
Bard1	0.6351	0.43124
Arl2	0.63361	0.71704
Cops8	0.63341	0.057158
Ing3	0.63339	0.24208
Tceb3	0.63241	0.35599
Ncf2	0.63238	0.10745
Olfr67	0.63225	0.053255
H3f3a	0.63134	0.47112
Arglu1	0.63068	0.23293
Trat1	0.63009	-0.13001
Rnf41	0.62989	0.16948
Pdss2	0.62884	0.42893
Olfr670	0.62865	0.015488
Prpf4	0.62858	0.81888
Eif3f	0.62803	0.38842
Olfr315	0.62775	0.05948
Mphosph10	0.62753	0.39007
Arnt	0.62614	-0.175
Sf1	0.6249	0.19247
Ube2e1	0.62473	0.035024
Gm20604	0.62461	1.4294
Jade1	0.62459	0.066189
Acad9	0.62456	0.39521
Ndufb6	0.62439	0.25769
Nup43	0.62418	0.30703
5430401F13Rik	0.62398	0.085508
Otub1	0.62364	-0.26746
Mapkbp1	0.62269	0.20372
Ppa1	0.62216	2.4703
Srfbp1	0.62179	0.6894
Scap	0.62169	1.0848
Card10	0.62166	0.13333
Vmn1r126	0.62111	0.39135
Bahd1	0.62103	-0.019421
Rdm1	0.62007	0.13046
Krtap5-4	0.61961	0.26565
Ncapd2	0.61878	0.44745
Mrps9	0.61839	0.63521
Mtx1	0.61831	0.30358
Med30	0.61829	0.31583
Ndufa9	0.61798	0.20777
BC027231	0.6178	0.5068
Smg7	0.61775	0.39139
Isy1	0.61741	0.70764
Zmynd8	0.61724	0.47134
Olfr59	0.6167	0.010801
Isca2	0.61618	0.52051
Nrd1	0.61595	0.65032
Wdr59	0.61579	0.58931
Hist1h2ai	0.6146	0.20715
Hspa14	0.61447	1.3166
Cox20	0.61447	0.89242
Atp6v1f	0.61433	0.32295
Tmem261	0.61395	0.27285
Fryl	0.61331	-0.10086
Ctnnbl1	0.613	0.57907
Whsc1l1	0.61289	0.11602
Gtf2h1	0.61193	0.31829
Ndufab1	0.61161	0.17136
Fbxo5	0.61154	0.46334
Dynlt1f	0.61135	0.086382
Mtbp	0.61099	0.14061
Olfr584	0.61036	0.024823
Srrt	0.61033	0.56199
Uros	0.61017	0.089534
Ccdc55	0.60999	0.081579
Rpl18a	0.60926	1.1013
Zmat2	0.60916	0.52168
Ccnt1	0.60851	0.20527
Dnajc2	0.60829	1.2639
Ndufa3	0.60829	0.33954
Otud7a	0.60828	0.058485
Mgme1	0.60739	0.21098
Pggt1b	0.60699	1.0544
Ints6	0.60631	0.58159
Nup93	0.60579	-0.16127
Brd9	0.60569	0.10159
Gm8693	0.60515	0.32592
Ddx19b	0.60515	-0.40178
Ankrd13b	0.60479	0.13663
Olfr412	0.60446	0.17683
Nubp1	0.60384	0.15604
Alg2	0.60336	0.25254
Ndufaf4	0.60329	0.22541
Mrto4	0.60314	1.2603
Tardbp	0.60299	0.47277
Pptc7	0.60293	0.15672
Mat2a	0.60231	0.81773
Mrvi1	0.60189	-0.051683
Pgk1	0.60132	1.1576
Usp17lc	0.6006	0.20057
Rps6	0.60052	0.51078
Olfr593	0.60002	0.0078984
9930111J21Rik1	0.59992	0.032391
Pabpn1	0.59962	0.41893
Klf5	0.59928	-0.2996
Gm13251	0.5991	0.64965
Dph1	0.5982	0.68514
Zfp768	0.59801	0.015426
Srbd1	0.59765	0.83642
Cct8l1	0.59746	-0.08085
Fubp3	0.59728	0.2555
Galnt13	0.59726	0.002468
Tada2b	0.5972	0.018217
Olfr603	0.59699	0.1187
Rhot1	0.59679	0.18577
Mob4	0.59571	0.61377
Usp24	0.59568	0.0050648
Amn1	0.59534	0.13543
Jak1	0.59502	0.15375
Celf1	0.59502	0.13947
Fdx1l	0.59473	0.3738
Nubp2	0.59465	0.71071
Pmvk	0.59459	1.159
Zfp689	0.59438	-0.022719
Acvr1b	0.59428	-0.086984
Map2k1	0.59415	0.049342
Sfrp1	0.59407	0.01917
Zranb2	0.5938	0.20498
Degs1	0.59353	-0.076888
Mrpl1	0.59298	0.26636
Zfp850	0.59262	0.032866
Olfr48	0.59256	0.0069995
Eif5	0.59195	0.13592
Kat7	0.59069	0.29362
Ndufs2	0.5902	0.35779
Coil	0.58989	0.2116
Polg	0.58922	1.0435
Fam47c	0.58907	0.0065277
Hdac1	0.5886	1.3699
Zfp85	0.58761	0.089068
Gtpbp8	0.58696	0.79952
Frmd7	0.58521	0.083721
Mep1b	0.58484	0.014788
Aqr	0.58479	0.88344
Supt7l	0.58458	-0.29495
Tmem126b	0.58438	0.33048
Xylt2	0.58397	0.22794
Ube2r2	0.58385	-0.53709
Chchd1	0.58344	0.54317
Elavl1	0.58259	0.36005
Smarcd1	0.58212	0.15147
Ahr	0.58198	-0.010212
Eif2b4	0.5812	0.64954
Pcnp	0.5811	0.097377
Ybx2	0.58041	-0.014242
Vmn2r30	0.57998	0.36014
Pkd2l2	0.57956	0.051429
Hnrnpd	0.57939	0.12095
Zswim7	0.57931	0.27326
Incenp	0.57929	0.5286
Snapc2	0.5791	-0.0095576
Yme1l1	0.57893	0.62529
Fbxl4	0.57882	0.1002
Psg23	0.57848	-0.028867
Rpl38	0.57751	0.67228
Hnf4a	0.57743	0.051573
Txn2	0.57692	0.82352
Mrps23	0.57685	0.64354
Olfr493	0.57685	0.076545
Donson	0.57664	0.32767
Snrpe	0.57649	0.3374
H2-Ke6	0.57594	-0.097592
Psmg1	0.57584	0.79221
LOC100862015	0.57542	0.17123
Zbtb14	0.57512	0.041032
Nudc	0.57509	0.12157
Rad9a	0.57417	1.3266
Rpp25l	0.57375	0.90583
Tex10	0.57361	0.29068
Aurkaip1	0.57358	0.36314
Zfp787	0.57336	-0.019775
Gm5795	0.57314	0.61974
Lars	0.57313	0.22173
En2	0.57309	0.00036923
2310003H01Rik	0.57198	0.017717
Ash2l	0.57127	0.32573
Tsen2	0.57072	0.45472
Olfr1532-ps1	0.57036	0.067803
Foxa1	0.5697	0.28175
Cdc37	0.56946	0.60752
Cep350	0.56941	0.33691
Ythdf3	0.56934	0.032524
Rnasek	0.56896	0.37824
Tbrg4	0.56857	0.3547
Gemin4	0.56838	0.046438
Zfp28	0.56819	0.04033
Lmnb1	0.56807	-0.72693
Gpatch4	0.56792	0.20291
Mrpl50	0.56779	0.4001
Prss45	0.5672	0.021466
Mterf3	0.56689	0.73951
Dll4	0.5663	0.00070763
Sf3a2	0.56546	1.4533
Wdr75	0.56528	0.48684
Uba1	0.56509	0.39861
Hnrnpl	0.565	1.1157
Serpina1d	0.56479	0.13756
Sardh	0.56468	0.023615
Olfr121	0.56437	0.042472
Tmem254c	0.56315	-0.049497
Anp32b	0.56279	-0.023831
Atp5o	0.56257	0.79208
Trio	0.56234	0.09412
Tas1r3	0.56169	-0.098804
Bbc3	0.56048	0.16195
Rxfp3	0.56021	0.041917
Pwp1	0.56014	1.3064
Gm14305	0.55952	0.62137
Arpc4	0.55947	0.53771
Acacb	0.55938	-0.0060209
Anapc10	0.55883	0.20268
Gm6588	0.5584	0.00087627
Bpifb3	0.55816	0.0208
Ppp4r1	0.5573	0.1857
Sez6	0.55682	0.17444
Ube2s	0.55646	-0.039787
Rrp36	0.5561	0.5481
Ptma	0.55585	0.60085
Elf1	0.55558	0.029002
Ndor1	0.55546	0.15981
Nup205	0.55399	0.12361
1700029P11Rik	0.55357	0.20629
Prdm9	0.55355	-0.090562
Supt4a	0.55348	0.34924
Inpp5k	0.55302	0.52576
Napa	0.55285	-0.034161
Mcts1	0.55269	-0.25111
Cpvl	0.55225	0.052299
Elmsan1	0.55217	0.024637
Mfn1	0.55185	0.47721
Sf3b3	0.5517	0.38199
Smek1	0.55141	0.20936
1700022I11Rik	0.55138	-0.087965
Cutal	0.55116	0.039831
Ces3a	0.55115	0.065334
Txn1	0.55089	0.41053
Slc2a4	0.55085	0.035228
Tmem258	0.55047	0.12725
Acvr1	0.55014	0.078994
Hint1	0.55009	0.20498
Serpinb6e	0.54996	0.00097651
Rhoa	0.54993	0.61612
Lmtk3	0.54949	0.056088
Rere	0.54873	0.14995
Hist1h2ab	0.54846	0.43487
Olfr561	0.54823	-0.029868
Rpl34	0.54694	0.78687
Gsk3a	0.54675	0.065224
Myo18a	0.54623	-0.064229
Tmem209	0.54596	-0.42335
Rab37	0.54581	0.12462
Mrps18b	0.54539	0.70503
Prkar1a	0.54524	-0.10571
Stk24	0.54434	-0.065999
Trmt12	0.54406	-0.0036137
1810043H04Rik	0.54387	0.47601
Olfr617	0.54377	0.039623
Zfp600	0.54323	0.82085
Noc2l	0.54321	0.18777
Olfr583	0.54308	0.036597
Rasa3	0.5429	-0.13459
Pla2g2e	0.54246	-0.010991
Krt35	0.54244	0.048058
Defb46	0.54226	0.011278
Smim8	0.54164	0.057161
Rbm33	0.5407	0.1957
Fau	0.54064	0.077784
Prkdc	0.54064	-0.018851
Elf3	0.5402	0.077657
Pou2f1	0.54006	0.14496
Hist1h3h	0.53983	0.26836
Rbbp4	0.53981	0.43175
Ppp3ca	0.53968	0.017344
Ssu72	0.53939	0.68683
Pdgfra	0.53932	0.021226
Hist1h4h	0.53902	0.56846
Zfp574	0.53895	0.12681
Cep83	0.53844	0.34154
Ppp3r1	0.53824	0.1667
Arhgef40	0.53812	0.012295
Cyp4x1	0.53803	-0.014661
Ap2m1	0.53775	0.69931
Gm1604b	0.53747	-0.053793
Supt16	0.53723	0.37335
Stoml2	0.53697	0.27806
Slc25a37	0.53675	0.18243
Dhx37	0.53656	-0.10606
Olfr1217	0.53655	0.064129
Ankhd1	0.53621	0.12107
1700016K19Rik	0.53619	0.070642
Tbcc	0.53557	0.054378
Tmem199	0.53554	0.25168
Gtpbp6	0.53524	0.38914
Coro7	0.53498	-0.026509
Tuba1b	0.53479	0.90485
Tmem88b	0.5341	0.10028
Fam89b	0.53397	-0.00066379
Retn	0.53388	-0.011136
Pmaip1	0.53382	0.022147
Tra2a	0.53347	0.032133
Olfr620	0.53342	0.06146
Olfr608	0.53281	0.022021
Gimap5	0.53213	0.04132
Ppa2	0.53202	0.693
Ddx19a	0.53194	-0.6495
Gjb6	0.53113	-0.070983
Taf5	0.53083	0.88975
P2rx1	0.53082	0.077249
Cbwd1	0.5307	0.93023
Enah	0.53041	0.047639
Arid2	0.52986	0.28435
Ndufa2	0.52981	0.38236
Olfr1426	0.52944	-0.028161
Apeh	0.52935	0.095406
Psmc4	0.52917	0.51418
Marcksl1	0.52906	-0.045481
Rbm25	0.52886	0.50448
Zdhhc13	0.52879	-0.087232
Lrig2	0.52779	-0.014518
Pdss1	0.52747	0.46151
Sox15	0.52695	0.15209
Znhit2	0.52666	0.079976
Rab35	0.52665	0.097431
Ndufb4	0.52629	0.3511
Taf3	0.52568	0.54917
Ythdf1	0.52498	0.062884
Ik	0.52465	0.51538
Nedd8	0.52463	-0.091796
Mcm6	0.52439	0.71667
Elf4	0.52439	0.11302
Col23a1	0.52327	0.12401
Gnl3l	0.52279	0.62167
Usp17ld	0.52236	0.14617
Gm3558	0.52224	0.42503
2810006K23Rik	0.52217	0.6036
Uqcc3	0.522	0.13875
Olfr469	0.52193	-0.0037364
Npm1	0.52192	0.81714
Cct3	0.52183	1.0865
Rps20	0.52182	0.64235
Rnmt	0.52138	0.39847
Hist1h4f	0.52136	0.25954
Zfp868	0.52115	-0.083292
Tubd1	0.52037	0.47499
Olfr380	0.52002	0.21234
Unc45a	0.51999	0.56611
Klf10	0.51997	0.077916
Loh12cr1	0.51982	0.16605
Baz2b	0.51974	0.10657
Rbm17	0.51954	0.29911
Cox5a	0.51915	0.46131
Sp2	0.51909	-0.27246
Smad7	0.51894	0.37406
Txnl4b	0.51849	0.25282
Cpox	0.51849	0.0089563
Clns1a	0.51783	0.53027
Ano7	0.51762	-0.017171
Ercc2	0.51694	0.80885
Acat2	0.51667	-0.035527
Dctn2	0.51641	0.08114
Espl1	0.51631	0.3481
4932411N23Rik	0.51578	0.080141
Tdrd6	0.51574	-0.032389
Cpb1	0.5156	0.043142
Nptx1	0.51547	0.041388
Gm10413	0.51518	0.49844
Ubtf	0.51494	0.59393
Chrm1	0.51469	0.02999
Srebf1	0.51468	0.36192
Hivep2	0.51458	-0.071643
Ndufa10	0.51428	0.25597
Pfdn2	0.51415	0.73415
Hsd17b7	0.514	-0.07339
Tsen54	0.51393	0.70651
Icmt	0.51366	0.10455
Arhgef2	0.51339	-0.02682
Rilp	0.51329	0.055002
Taf1d	0.513	0.61164
Zfp781	0.51221	0.12983
Ilf2	0.51215	0.06828
Gltscr1	0.51186	0.044019
Mrps22	0.51181	0.52084
Pfdn6	0.51176	0.81225
Olfr402	0.5117	0.20537
Wfdc1	0.51161	-0.071066
Rela	0.51093	0.15187
Tmsb15b1	0.51057	0.047613
Nolc1	0.51053	0.67842
Btbd18	0.51033	0.074341
Chd7	0.50955	0.10973
Snapc4	0.50927	0.23259
Nrbf2	0.50891	-0.064154
Rsph6a	0.50889	0.12506
Ano1	0.50835	0.087662
Papola	0.50805	0.34032
Gpr146	0.50766	-0.030303
Rrm2b	0.50765	-0.008961
Gm5797	0.50752	0.32607
Pgp	0.5074	0.027338
Gm428	0.50736	0.34275
Tsr1	0.50721	0.24638
Cts8	0.50704	0.030176
Wnt8a	0.50693	0.051445
Olfr688	0.50613	0.040086
Gm13306	0.5061	0.0035522
Zfp592	0.50543	0.25261
Lin54	0.50527	0.040509
Lum	0.50525	0.074873
Rps6ka4	0.50449	-0.011426
Oxa1l	0.50441	1.0201
Dtna	0.50377	0.068335
Olfr433	0.50346	0.0016819
1700026L06Rik	0.50319	0.077629
Csad	0.50296	-0.099104
H3f3b	0.50293	0.058807
Nfya	0.50286	-0.031911
Olfr1381	0.50281	0.23634
Dlg4	0.50277	0.11726
Gm5726	0.5027	0.044322
Cap1	0.5024	0.74362
Pdk2	0.50208	0.13223
Hist1h4b	0.5015	0.26431
Sec14l1	0.5015	-0.1345
Plcxd2	0.50132	0.03291
Mterf1a	0.50109	0.052456
Ywhae	0.50099	0.25372
Ube2e3	0.50051	0.029817
Kcnh1	0.50041	0.092145
Tcf25	0.49992	0.090588
Casp3	0.49971	0.14647
Gm6812	0.49904	-0.038133
Zswim6	0.499	-0.099126
Vmn1r121	0.4987	0.21998
Mmd	0.49865	0.070886
Haus7	0.49824	0.44975
Ctsq	0.49804	-0.043675
Thap11	0.49798	0.70694
Il6st	0.49781	0.045439
Gm13139	0.49723	0.68927
Coq3	0.49695	0.25611
Clpb	0.49674	0.031501
Lypd6	0.49619	0.058109
Pcdha8	0.49592	-0.012973
Olfr890	0.49545	0.026217
Cenpu	0.49542	0.60893
Vmn1r18	0.49535	-0.047917
Dda1	0.49513	0.5422
Tpd52l1	0.49496	-0.0035602
2010109A12Rik	0.49483	0.053357
Tra2b	0.49453	0.14207
Nsl1	0.49436	0.18823
Zfp287	0.49414	0.13525
Sart3	0.49386	0.020371
Proc	0.49362	0.059389
Ikbkb	0.49357	0.22447
Gnb2l1	0.49354	0.45634
Serf2	0.49335	0.45407
Tmem53	0.49333	0.056652
Hypk	0.49329	0.49551
Nudt4	0.49285	-0.0065129
Trpm7	0.49192	0.39445
Ddx10	0.49176	0.50849
Inpp4a	0.49153	-0.0061128
Tmem180	0.49152	-0.055343
Olfr1184	0.49145	0.076041
Pqlc2	0.49138	0.055392
Trmu	0.49121	0.63136
Bhlha9	0.49119	0.032593
Olfr1019	0.49078	0.075986
Olfr639	0.49061	-0.065338
2410004B18Rik	0.49017	0.057414
Sacm1l	0.49003	0.48807
Atp6v1b2	0.48972	0.46531
Ift57	0.48962	-0.11966
Nop14	0.48859	0.76304
Olfr624	0.48841	0.10637
Lhfp	0.48837	0.027373
Fcgr2b	0.48821	-0.044123
Slc7a5	0.48804	0.57239
Cbfa2t2	0.48793	0.062997
Pcnxl2	0.48788	0.026387
Naca	0.48761	0.88188
Ccdc154	0.4876	0.019101
Cops4	0.48696	0.077638
Pgls	0.48647	0.31324
Ctdsp1	0.48615	0.28016
Ramp1	0.48612	-0.033259
Chchd5	0.48552	0.24331
Nt5dc1	0.48542	0.047277
Ptpn2	0.48541	-0.033982
Gadd45gip1	0.48537	0.80567
Ipo5	0.48506	0.24928
Zmat5	0.48506	-0.077156
Olfr303	0.48499	-0.0012115
Olfr328	0.48487	0.1406
Rlim	0.48483	0.21126
Olfr547	0.48358	0.070781
Cep152	0.48333	0.1759
Mettl17	0.48322	0.64971
Gm21975	0.48315	0.10084
Copz1	0.48312	0.36312
1700011L22Rik	0.48303	0.0010712
Mapk7	0.48285	0.041347
Terf2ip	0.48267	0.089174
Ncbp2	0.48253	0.45119
Serp1	0.4825	0.063524
Drosha	0.48239	0.034559
4921504E06Rik	0.48199	0.083906
Ints7	0.48187	0.093681
Cd79b	0.48149	0.13449
Grxcr1	0.48114	-0.036616
Rrp7a	0.48094	0.18669
Gbp11	0.4806	0.068053
Aurkc	0.48017	0.23085
Olfr43	0.47989	0.18637
Bmi1	0.47988	-0.0053728
Vmn1r201	0.47975	0.023489
Cpt2	0.47966	0.15363
Vmn2r31	0.47957	0.25119
Dctpp1	0.47932	0.017854
Clrn3	0.4793	0.018042
Rpn2	0.47926	-0.096971
Dctn4	0.47916	0.23765
Tmem59l	0.47908	0.00087822
Ascc3	0.47899	0.96658
Zfp945	0.47884	0.019295
Ppie	0.47883	0.72643
Cript	0.47858	0.52682
Surf4	0.47838	0.055865
Errfi1	0.478	-0.22299
Trip12	0.47788	-0.43544
Mettl3	0.47759	0.15225
Olfr544	0.47743	0.062303
Ltn1	0.47735	0.041391
Dnajb3	0.47722	0.01651
Lrrc14b	0.47719	-0.012981
Hars	0.47666	0.24457
Ercc6l	0.47632	0.8853
Vmn1r183	0.47611	0.43606
Tprkb	0.47554	0.55142
Usp47	0.47534	0.12952
Prpf6	0.47522	0.36238
Krt31	0.47503	0.10404
Hsd3b7	0.47496	-0.019018
Cep120	0.47486	0.49119
Rbm39	0.47482	0.071132
Bad	0.47459	0.1043
Emilin1	0.47456	-0.015646
Zscan4f	0.47388	0.28351
Sufu	0.47383	-0.036373
Tnfsf15	0.47348	-0.014055
Olfr557	0.47342	-0.0024981
Myo19	0.47329	0.25063
Cntn4	0.47311	0.094356
Zfp182	0.47285	0.0033613
Kdm5c	0.47276	0.16835
Sod1	0.47254	0.47818
AK010878	0.47253	0.58859
Bcas3	0.4725	0.1118
Micu1	0.47237	0.24718
Tpgs2	0.47229	0.11759
Akr1c13	0.47228	-0.025326
Fopnl	0.47214	0.33075
Znhit3	0.47197	0.41732
Gde1	0.47187	0.057534
Olfr777	0.47173	0.065425
Diap1	0.47171	-0.0014227
Bet1	0.47158	0.1168
0610010F05Rik	0.47129	0.043851
Exosc5	0.4712	0.2652
Gm8653	0.47114	0.15911
Vmn2r91	0.47113	-0.0045725
Ndufs3	0.47102	0.2262
BC049730	0.47097	0.12783
Zzz3	0.47096	0.34591
Pcdha3	0.47075	0.097726
Sept1	0.47066	0.062811
Ankrd26	0.47058	0.13646
Efcab5	0.47037	0.12519
Hnrnpab	0.47028	0.18196
Zscan4b	0.47009	0.22024
Ndufb11	0.46998	0.23092
Pak4	0.46977	0.20783
Polr1a	0.46974	0.74246
Snrnp200	0.46929	1.0193
Cox4i1	0.46921	0.26467
Zfp456	0.46913	0.10912
2300003K06Rik	0.46904	0.054613
Olfr410	0.46884	0.08642
Olfr568	0.46716	0.066242
Armc7	0.46659	0.71826
Hist1h2ae	0.4664	0.37165
Zfp454	0.46633	0.068976
Nlk	0.46577	0.045179
Olfr1006	0.46574	0.11195
Smpd1	0.46562	-0.045269
Slc22a8	0.46557	-0.039597
Cdca7	0.46553	0.10932
Ctps	0.46538	0.27464
Nudt2	0.46538	-0.030339
Cdc20	0.46531	0.46776
Wnt3a	0.46505	0.092176
Vmn2r49	0.46502	0.53635
Med28	0.46486	0.091083
Nrip3	0.464	-0.083831
Pten	0.46383	-0.76501
Cox6a2	0.46382	-0.022152
Fosl2	0.46369	-0.019492
Smg8	0.46345	-0.20383
Cox11	0.46318	0.57216
Scube1	0.46283	0.10979
Fam173a	0.46271	-0.037598
Psmg4	0.46268	0.13871
Olfr619	0.46224	0.085744
Ddi2	0.46191	0.26681
Gnal	0.46187	-0.045785
Ttc30a2	0.46155	-0.052368
Psmb4	0.46141	0.83568
Nfyb	0.46141	0.23579
Dlgap5	0.46136	-0.034704
Per1	0.46116	0.099752
Rint1	0.46106	0.51058
4930578I06Rik	0.46086	-0.063566
Olfr535	0.46058	0.055941
Rps24	0.46045	0.70624
Ints5	0.46006	-0.24065
Sf3b2	0.45924	0.76648
Rnf126	0.45915	0.011507
Sorbs2	0.45915	-0.028904
BC049762	0.45901	0.081621
Ceacam5	0.45883	0.11689
Ccdc130	0.45871	0.08118
Gle1	0.45858	-0.11566
Pomgnt2	0.45841	0.10354
Ccdc79	0.4583	0.020746
Speer4c	0.4582	0.086204
Rwdd2a	0.45804	-0.026352
Maml1	0.45792	0.31581
Ctnna1	0.45791	0.025013
Ddx5	0.45742	0.42955
P3h4	0.45742	0.20362
Ltbp1	0.45668	0.025818
Nap1l4	0.45664	-0.076776
Nol12	0.45634	0.60931
Zfp831	0.45628	0.019384
Dnajc9	0.45547	0.89783
Lrrn4cl	0.4551	0.056722
Polr3e	0.4548	0.67801
Fbxl20	0.45467	0.071669
Gm6710	0.45458	0.31683
Vmn2r44	0.4539	0.41694
Cdk6	0.45333	0.20383
Gm5662	0.4533	0.41819
Adm	0.453	-0.026719
Ces3b	0.45293	0.030329
Mrps31	0.45258	0.36516
Tas2r126	0.45252	-0.0019586
Olfr566	0.45247	0.082363
Mylk4	0.45242	-0.046569
Akr1b7	0.45235	0.04228
Olfr675	0.45227	0.021561
Acy3	0.45225	-0.0029428
Pde8a	0.45195	0.058526
Dclre1b	0.45174	0.72037
Gm11559	0.45169	0.30957
Cts7	0.45165	-0.10317
Olfr20	0.45161	0.07632
Wrb	0.45157	1.2754
Rpp21	0.45119	0.24979
Hist1h2bn	0.45116	0.66897
Vmn1r208	0.45108	-0.027362
Krtap5-2	0.45012	0.23689
Dhrs11	0.45011	0.12258
Ero1lb	0.44979	0.0019174
Ccbl1	0.44972	0.015652
Med26	0.44956	0.46372
Fxn	0.44949	0.25775
Hp	0.44926	-0.0071175
Cep55	0.44923	0.43672
Psmd1	0.44916	0.60304
Mmgt2	0.44915	0.12328
l7Rn6	0.4489	0.32815
Macrod1	0.44874	-0.14591
Olfr648	0.44855	0.069028
Strip1	0.44853	0.45845
Zfp607	0.44835	-0.045769
Inpp5f	0.44825	0.082829
Kcnab3	0.44821	0.035157
Olfr495	0.44736	0.05022
Acer1	0.44735	-0.00021828
B4galt6	0.44727	0.0035335
Zfp608	0.4471	-0.00015065
Rtfdc1	0.44702	0.39182
Olfr504	0.4469	0.052441
Ngly1	0.44673	0.0039748
Fbl	0.4466	0.8619
Bclaf1	0.44655	0.026083
Rrp1	0.44649	0.53632
Mis12	0.4458	0.46839
Sh2b1	0.44576	-0.008983
Nsmce4a	0.44548	0.27391
Dpf1	0.44537	0.097797
Fpr1	0.44522	-0.046807
Ube2k	0.44494	0.064838
Dapk1	0.44465	-0.071854
Grm5	0.44439	0.063148
Ogfod3	0.44402	0.01901
Gm11562	0.44398	0.30881
Timeless	0.44389	0.50177
1600002H07Rik	0.44389	0.25877
Ndufv2	0.44364	0.35143
Abca6	0.44344	0.11134
Pbrm1	0.44321	0.15494
Cd151	0.44321	0.075457
H2-T24	0.44309	0.074628
Oser1	0.44303	0.24425
Rad18	0.44303	0.099725
Tspan18	0.44262	-0.042226
Pno1	0.44216	-0.071077
Arrb1	0.44207	-0.018423
Olfr695	0.44151	0.061956
Spata22	0.44122	0.01835
Osgep	0.441	0.72324
Clnk	0.44091	0.062802
Sertad3	0.44049	-0.044833
Olfr800	0.44048	0.1214
Ifnar2	0.44041	0.058904
Slc22a5	0.44017	0.039909
Lep	0.44006	-0.013529
Cluh	0.43997	0.25685
Fbxo32	0.43965	0.15678
Vmn1r12	0.43954	-0.0021295
Lims1	0.43915	0.13262
Mier3	0.43909	0.055728
Gm4133	0.43856	0.16953
Katnbl1	0.43847	-0.02218
Trim30a	0.43844	0.049628
Slc25a30	0.43782	0.04443
Rps6ka3	0.43724	0.28815
Ndufb8	0.43719	0.27142
Cdc25b	0.43714	-0.17507
Ppp6r3	0.43693	0.018714
Sf3a3	0.43687	0.68005
Vmn1r81	0.4368	0.041871
Phf2	0.43657	0.14458
Morn3	0.43648	0.0037185
Btbd10	0.43644	-0.063951
LOC100048884	0.43606	0.63814
Olfr312	0.43587	0.060084
Olfr1295	0.43555	0.14114
Copb2	0.43546	0.89327
Pdzd9	0.43513	-0.0027704
Nxn	0.43482	0.10915
Nlrp1a	0.43471	0.11391
Lrrc59	0.43461	0.059989
Btg1-ps1	0.43459	0.028492
Nupl2	0.43457	-0.29082
Fbxo38	0.43452	0.12983
Agap1	0.43437	0.011042
Ndufs5	0.43427	0.17546
Smim12	0.43376	-0.039217
Gm13154	0.43315	-0.086032
Kif9	0.4331	0.044853
Tmem175	0.43286	0.045905
Dlc1	0.43283	0.015466
Nacc1	0.43259	0.15559
Gm8720	0.43254	0.30631
Psmb9	0.4324	-0.10894
Vmn1r196	0.43237	-0.050893
Synrg	0.43198	0.11758
Iars	0.43168	0.67306
Eif2s1	0.43165	-0.0447
Slc25a5	0.43145	0.063832
Tnpo3	0.43145	-0.41624
Hspg2	0.43112	0.097376
Olfr486	0.43097	0.17607
Slc16a11	0.43087	-0.027055
Atp2a3	0.43067	0.01204
Tarm1	0.4303	0.036516
Gadd45g	0.4303	0.015462
Cylc1	0.43028	0.018232
Poldip2	0.42977	0.22809
Plbd1	0.42943	0.010376
Tnnt2	0.42922	0.066492
Spry4	0.42856	-0.049933
Tsen34	0.42835	0.42914
Cenpj	0.42831	0.52942
Rfxank	0.42815	-0.016832
Gm13152	0.42808	0.22578
Cox14	0.42799	0.37959
Taf10	0.42782	0.43086
Ppif	0.42756	0.015952
Srsf6	0.42723	0.14311
Tcerg1	0.42696	0.21587
Entpd8	0.4269	-0.045893
Clasrp	0.42677	0.22373
Olfr291	0.4267	-0.069532
Trpv1	0.42667	0.06158
Smg6	0.42647	0.21221
Capn11	0.42625	-0.040518
Hist2h2aa2	0.4258	0.59059
Psg19	0.42557	0.27219
Spn	0.42549	-0.011738
Sebox	0.42538	0.044959
Csf3	0.42528	0.017774
D5Ertd579e	0.42528	0.0049525
Isg20	0.42502	0.067094
Ddx51	0.42436	0.38374
Rfx2	0.42411	-0.10432
Adap2	0.42409	0.043937
Pinx1	0.42404	0.80544
Vmn2r92	0.42399	0.014608
Tubb3	0.42395	0.09303
Flnb	0.42381	-0.019155
Minos1	0.42346	0.41236
Spink5	0.42339	0.029963
Vmn2r97	0.42337	0.042763
Zfp954	0.42332	0.12677
Ccdc125	0.42321	0.050061
Ndufb2	0.42319	0.1444
Hnrnpk	0.42303	0.58236
Wipf2	0.42301	0.034331
Top1	0.42294	0.61927
Rdh16	0.42292	-0.017255
Vmo1	0.42277	0.1091
Atp5d	0.42268	0.73673
Kif2c	0.42238	0.45469
Polr2j	0.42226	0.56786
Gm7168	0.42206	0.097891
Vmn1r163	0.42203	0.23227
Gp2	0.42155	-0.081977
Onecut1	0.42153	0.089581
2210018M11Rik	0.42139	0.12839
Olfr936	0.42081	0.038447
Ndnl2	0.4208	0.58402
Hist1h3c	0.42066	0.70093
Matk	0.42056	0.090713
Actr10	0.42052	0.39474
Zfp579	0.4205	-0.0054571
Agfg1	0.42048	0.089411
Gm11569	0.42029	0.23472
Larp4	0.4201	0.42376
Actr1b	0.42002	-0.11865
Parp2	0.41999	0.094143
Car15	0.41972	0.024056
Olfr668	0.41964	0.00052665
Urad	0.41951	0.0036093
Cdh16	0.41938	-0.025481
Ccdc150	0.41912	0.056066
Heph	0.41911	0.14012
Mtfr1	0.41898	0.16187
Hist1h4j	0.41876	0.37943
Ecsit	0.41795	0.18235
Cdv3	0.41765	0.2124
Nrg2	0.4176	0.041184
Fam122a	0.41753	-0.11759
Cep164	0.41745	0.081326
Olfr479	0.41742	-0.013861
Dnajc7	0.4174	-0.10022
Morf4l1	0.41713	0.074764
H2-DMa	0.41705	-0.057033
Gpr31b	0.41692	-0.0088945
Gm3500	0.41682	0.7925
Vmn1r149	0.41657	0.89759
Bbx	0.41646	-0.21013
Zdhhc12	0.41644	0.12322
Epb4.1l4a	0.41577	0.074672
Arhgef26	0.41575	0.14632
4933430I17Rik	0.41564	0.15721
Ncl	0.41533	0.79236
Hist1h2bm	0.41527	0.67959
Xirp2	0.41527	0.046241
Shbg	0.41517	0.07823
Olfr843	0.41453	-0.011764
3110052M02Rik	0.41451	-0.0091492
Rbm48	0.41438	-0.017864
Tshz1	0.41387	0.12262
Prl6a1	0.41361	0.031851
Coq2	0.41353	0.38835
Mknk2	0.41349	0.023998
Usp40	0.41334	0.0063238
Tcstv3	0.41324	0.060729
Olfr381	0.41317	0.19535
C1qtnf6	0.41303	-0.001591
Cblb	0.41303	-0.052684
Vmn1r148	0.41299	0.625
Nubpl	0.41289	0.44265
Wdr93	0.41273	0.07782
Mrm1	0.41269	0.13626
Cenpc1	0.41264	0.30399
Olfr1197	0.41263	0.11658
Vsx2	0.41216	0.027641
Gcm2	0.4121	-0.011516
Olfr683	0.41206	-0.027026
Rpa3	0.41201	0.20785
Hdac9	0.41192	-0.044004
Lrrc45	0.4119	0.12444
Naa10	0.41153	0.21776
Klra17	0.41149	0.11559
Mctp1	0.41121	-0.010242
Olfr446	0.41116	0.039373
Fam103a1	0.41098	0.20326
Arap3	0.41067	0.019653
Csnk2a2	0.41055	-0.029575
Slc7a1	0.41005	0.29147
Oog4	0.41003	0.047431
Zdhhc9	0.40969	-0.048549
2210407C18Rik	0.40964	0.079485
Olfr524	0.40964	0.07726
Gm6377	0.40954	-0.070671
Slc25a11	0.40953	0.067316
Ccr6	0.4093	-0.032926
Polr2m	0.4086	0.22051
Gal3st4	0.40845	0.031617
Olfr1135	0.40838	0.07469
Retnlg	0.40827	-0.051025
[truncated: 17,676 more rows]

## Sheet: Supplementary Data 1b
Supplementary Data 1b. List of genes enriched in both Gemcitabine and Selinexor screens.
1110008L16Rik
1810026J23Rik
2010107E04Rik
2700062C07Rik
Aamp
Aars2
Aasdhppt
Abce1
Abt1
Acly
Actb
Actl6a
Actr2
Actr6
Adat2
Adat3
Adck4
Adh7
Aifm1
Alyref
Ap2s1
Apaf1
Apopt1
Arih1
Atad3a
Atp2b1
Atp5a1
Atp5b
Atp5c1
Atp5e
Atp5h
Atp5j2
Atp6v1e1
Atp6v1g1
Atpaf2
Atxn10
Aurka
Bak1
BC005624
BC052040
Bccip
Bcl10
Bcl2l11
Birc5
Bms1
Bop1
Brd4
Brd8
Brpf1
Btaf1
Bub3
C1d
C1qbp
C330007P06Rik
Cactin
Capzb
Cars
Cars2
Casp9
Cbfb
Ccdc137
Ccdc51
Ccna2
Ccnc
Ccnd1
Ccnh
Ccnl1
Cct2
Cct4
Cct5
Cct7
Cct8
Cd2bp2
Cdc123
Cdc45
Cdc7
Cdipt
Cdk11b
Cdk9
Cebpz
Cenpm
Cenpo
Cenpp
Cenpq
Cenpw
Cfap20
Chaf1b
Chchd4
Chd4
Cherp
Chuk
Ciao1
Cinp
Cirh1a
Cltc
Cmtr1
Coa5
Coa6
Coa7
Copa
Copb1
Cops5
Cops6
Coq4
Coq5
Coq6
Cox10
Cox16
Cox17
Cox18
Cox19
Cox5b
Cox6b1
Cox6c
Cox7b
Cox7c
Crls1
Crnkl1
Cryba1
Csnk2b
Csrp2bp
Ctcf
Ctu1
Ctu2
Cul2
Cwc22
Cwc25
Cwf19l1
Cyc1
Cycs
D2Wsu81e
D8Ertd738e
Dap3
Dapk3
Dars
Dars2
Dbf4
Dbr1
Dcaf13
Dctn5
Dctn6
Ddx18
Ddx20
Ddx21
Ddx27
Ddx28
Ddx3x
Ddx42
Ddx49
Ddx52
Ddx54
Ddx55
Ddx56
Ddx59
Defa2
Dhfr
Dhps
Dhx30
Dhx33
Diexf
Dimt1
Dis3
Dis3l
Dkc1
Dmap1
Dnaaf5
Dnajc11
Dnajc5
Dnm1l
Dnm2
Dohh
Dph2
Dph3
Dph5
Dph6
Dr1
Drap1
Eaf1
Eapp
Ebna1bp2
Ect2
Eed
Eef1g
Eef2
Eftud1
Eftud2
Ehbp1
Eif1ad
Eif2b1
Eif2b2
Eif3a
Eif3i
Eif4e
Eif4enif1
Eif6
Elac2
Ell
Elp2
Elp3
Elp4
Elp5
Elp6
Emg1
Ep400
Eral1
Esf1
Etf1
Exosc1
Exosc10
Exosc2
Exosc4
Exosc7
Exosc8
Exosc9
Fam210a
Fam96b
Fam98b
Fars2
Farsb
Fastkd5
Fcf1
Fdps
Fdxr
Fech
Fen1
Flii
Fosl1
Foxa2
Fto
Ftsj2
Ftsj3
Gapdh
Gars
Gatb
Gatc
Gemin2
Gemin8
Gfer
Gfm1
Gfm2
Ggps1
Gins1
Gins2
Gins3
Gins4
Glrx5
Gm10406
Gm11711
Gm14440
Gm15319
Gm17019
Gm20767
Gm2897
Gm4297
Gm4559
Gm5148
Gm561
Gm5796
Gmppb
Gmps
Gnb1l
Gnl2
Gnl3
Gpi1
Grpel1
Grwd1
Gtf2h4
Gtf2h5
Gtf3c4
Gtpbp3
Gtpbp4
Haus2
Haus3
Haus8
Hbs1l
Hccs
Heatr1
Hectd1
Hinfp
Hist1h2ag
Hist1h3a
Hist1h3e
Hist2h3b
Hist3h2ba
Hk2
Hmgb1
Hmgcs1
Hmgn2
Hmgxb3
Hnf1b
Hnrnpf
Hnrnpu
Hscb
Hsd17b10
Hspa9
Hspd1
Hspe1
Htatsf1
Iars2
Iba57
Ikbkap
Imp3
Imp4
Ints2
Ipo7
Isca1
Kars
Kat5
Kat6a
Kdm8
Kif11
Kif18b
Klf13
Kmt2a
Krr1
Krtap5-3
Krtap5-5
Kti12
Lage3
Lamtor1
Lamtor2
Lamtor3
Lamtor4
Lars2
Las1l
Ldha
Letm1
Lig3
LOC100861615
Lonp1
Lrpprc
Lrrc46
Lsg1
Lsm10
Lsm11
Lsm2
Lsm3
Lsm5
Lsm6
Lsm8
Lyrm4
Magoh
Mak16
Malsu1
Map2k6
Mapk14
Mapre1
Mars2
Max
Mbd2
Mbtps1
Mcat
Mcm10
Mcm2
Mcm3
Mcm4
Mcm5
Mcm7
Mcmbp
Mcrs1
Mdn1
Meaf6
Med1
Med10
Med12
Med13
Med14
Med15
Med19
Med20
Med23
Med24
Med27
Med29
Med31
Med4
Med7
Med9
Metap1
Mettl14
Mettl16
Mfap1a
Mfap1b
Mga
Mios
Mipep
Mis18a
Mis18bp1
Mms19
Mocs3
Mre11a
Mrpl10
Mrpl11
Mrpl12
Mrpl13
Mrpl14
Mrpl15
Mrpl16
Mrpl17
Mrpl18
Mrpl19
Mrpl2
Mrpl20
Mrpl22
Mrpl23
Mrpl24
Mrpl27
Mrpl28
Mrpl3
Mrpl30
Mrpl32
Mrpl33
Mrpl34
Mrpl35
Mrpl36
Mrpl37
Mrpl38
Mrpl39
Mrpl4
Mrpl40
Mrpl41
Mrpl42
Mrpl43
Mrpl44
Mrpl45
Mrpl46
Mrpl47
Mrpl48
Mrpl49
Mrpl51
Mrpl52
Mrpl53
Mrpl54
Mrpl55
Mrpl57
Mrpl9
Mrps10
Mrps11
Mrps12
Mrps14
Mrps15
Mrps16
Mrps17
Mrps18a
Mrps18c
Mrps2
Mrps21
Mrps24
Mrps25
Mrps26
Mrps27
Mrps28
Mrps30
Mrps33
Mrps34
Mrps35
Mrps5
Mrps6
Mrps7
Msto1
Mta2
Mtch1
Mtch2
Mterf4
Mtg1
Mtg2
Mtif2
Mto1
Mtor
Mtpap
Mtrf1l
Mtx2
Mup8
Mup9
Mybbp1a
Mybl2
Myc
Myh9
Myl12b
N6amt1
Naa15
Naa20
Naa25
Naa50
Nae1
Naf1
Nars2
Nat10
Ncapg
Ncbp1
Nckap1
Ndufa1
Ndufa11
Ndufa13
Ndufa6
Ndufa8
Ndufaf7
Ndufb5
Ndufb9
Ndufc2
Ndufs1
Ndufs7
Ndufs8
Nelfb
Nelfcd
Nfs1
Ngrn
Nhlrc2
Nhp2
Nifk
Nip7
Nipbl
Nle1
Nmd3
Noa1
Noc3l
Noc4l
Nol10
Nol6
Nom1
Nop10
Nop16
Nop2
Nop56
Nop58
Nop9
Nrde2
Nrf1
Nsa2
Nsun4
Nudcd3
Nudt21
Nufip1
Nup214
Nutf2
Ogt
Oip5
Olfr1371
Olfr1386
Olfr403
Olfr494
Olfr553
Olfr582
Olfr597
Olfr635
Olfr809
Opa1
Oraov1
Orc3
Orc4
Orc5
Orc6
Oxsm
Pabpc1
Pafah1b1
Pak1ip1
Pars2
Pawr
Pdcd11
Pdcd2
Pdpk1
Pelp1
Peo1
Pes1
Pet100
Pet117
Pfas
Pfkl
Pgam1
Pgd
Pgs1
Phb
Phb2
Pigw
Pik3c2a
Pin1
Pisd
Pkm
Plk1
Pmpca
Pmpcb
Pnpt1
Pold1
Polg2
Polr2b
Polr2c
Polr2d
Polr2g
Polr2k
Polr3f
Polrmt
Pop5
Ppan
Ppil1
Ppil4
Ppp2r3c
Ppp2r4
Ppp4c
Ppwd1
Prelid1
Prim2
Prkrip1
Prkrir
Prmt1
Prmt5
Prpf18
Prpf19
Prpf3
Prpf38a
Prpf38b
Prpf40a
Prpf8
Psma4
Psma5
Psma6
Psmc1
Psmc2
Psmc5
Psmd2
Psmg2
Psmg3
Ptbp1
Ptcd1
Ptcd3
Pttg1
Pwp2
Pyroxd1
Qrsl1
Rab18
Racgap1
Rad50
Rangrf
Rars2
Rbbp5
Rbm19
Rbm28
Rbm47
Rbm8a
Rbmx2
Rcl1
Rex2
Rfc2
Rfwd2
Rgp1
Riok1
Rnaseh1
Rnf20
Rnf40
Rnmtl1
Rnpc3
Rock2
Romo1
Rpf2
Rpia
Rpl10a
Rpl11
Rpl12
Rpl13
Rpl14
Rpl15
Rpl17
Rpl18
Rpl19
Rpl21
Rpl23
Rpl23a
Rpl24
Rpl26
Rpl28
Rpl29
Rpl31
Rpl32
Rpl35
Rpl35a
Rpl36
Rpl36a
Rpl36al
Rpl37
Rpl37a
Rpl39
Rpl4
Rpl6
Rpl7
Rpl7a
Rpl7l1
Rpl8
Rpl9
Rplp0
Rplp2
Rprd1b
Rps11
Rps13
Rps15
Rps17
Rps18
Rps19
Rps2
Rps23
Rps25
Rps26
Rps27
Rps27rt
Rps28
Rps3
Rps4x
Rps7
Rpsa
Rptor
Rpusd4
Rraga
Rragc
Rrp12
Rrp15
Rrp9
Rsl1d1
Rsl24d1
Rtcb
Rtn4ip1
Ruvbl2
Sae1
Samm50
Sars2
Sbno1
Scgb1b7
Sco1
Sco2
Sdad1
Sec61a1
Seh1l
Set
Setd1b
Sf3a1
Sf3b1
Sf3b4
Sf3b5
Sf3b6
Sin3b
Ska2
Skiv2l
Skiv2l2
Skp1a
Skp2
Slc16a1
Slc25a26
Slc25a46
Slc25a51
Slc2a1
Slc30a9
Slc35b1
Slmo2
Smarca5
Smc1a
Smc2
Smc3
Smc4
Smc6
Smu1
Snapc1
Snapc5
Snrnp40
Snrpd1
Snrpd2
Snrpd3
Snrpf
Snrpg
Snw1
Spata5
Srrm1
Srsf1
Srsf10
Srsf2
Srsf3
Srsf7
Ssb
Ssbp1
Stard7
Stat3
Stil
Sub1
Sumo2
Supv3l1
Surf6
Suz12
Tada2a
Tada3
Taf12
Taf1c
Tamm41
Tars
Tars2
Taz
Tbca
Tbcb
Tbcd
Tbl3
Tbp
Tcp1
Tefm
Telo2
Tfam
Tfb1m
Tfb2m
Tfdp1
Tfrc
Tgif1
Thg1l
Thoc3
Timm10
Timm10b
Timm13
Timm22
Timm50
Timm9
Tma16
Toe1
Tomm20
Tomm22
Tomm40
Tomm7
Tomm70a
Top3a
Tpi1
Tpt1
Tpx2
Triap1
Trim28
Trit1
Trmt10c
Trmt112
Trmt6
Trmt61a
Trnt1
Trp53rk
Trrap
Trub2
Tsfm
Ttc1
Ttc27
Ttc4
Ttf2
Tti2
Tuba1a
Tuba1c
Tubb5
Tufm
Twistnb
Tyms
U2af2
U2surp
Uba3
Uba52
Ube2l3
Uqcc1
Uqcc2
Uqcr10
Uqcrb
Uqcrc1
Uqcrc2
Uqcrfs1
Uqcrq
Urb1
Urb2
Urm1
Usb1
Usmg5
Usp17la
Usp30
Usp36
Usp39
Utp15
Utp18
Utp20
Utp23
Utp6
Uxt
Vars2
Vbp1
Vdac1
Vhl
Vmn1r114
Vmn1r117
Vmn2r32
Vmn2r35
Vmn2r38
Vprbp
Vps13d
Vrk1
Wars2
Wbscr16
Wbscr22
Wdr1
Wdr12
Wdr18
Wdr24
Wdr25
Wdr3
Wdr36
Wdr43
Wdr5
Wdr61
Wdr73
Wdr74
Wdr77
Wdr82
Wdr83
Yae1d1
Yars
Yars2
Ybey
Yeats2
Yeats4
Ykt6
Yrdc
Zbtb2
Zbtb8os
Zfp207
Znhit6
Zpr1

## Sheet: Supplementary Data 1c
Supplementary Data 1c. List of genes depleted in both gemcitabine and selinxor screens.
2410127L17Rik
Aaas
Ago2
Ambra1
Ankrd52
Ap1m1
Ap3d1
Arid1a
Asun
Atp13a1
Bcl2
Bcor
Casp8
Ccz1
Cflar
Clcc1
Cnot2
Csde1
Csnk2a1
Cstf3
Ctdspl2
Cul5
Depdc5
Dnaja1
Dyrk1a
E130309D02Rik
Edc4
Eif2s2
Eif3h
Eif4g2
Eprs
Fam208a
Gnas
Gnpat
Hexim1
Ilk
Ints10
Jmjd6
Kdsr
Keap1
Kmt2d
Kpna4
Kpnb1
Lsm1
March5
Mcl1
Naa30
Naa35
Ncoa5
Ncor1
Nprl2
Nprl3
Paxip1
Pcbp2
Pdap1
Pik3r4
Ppm1f
Prrc2a
Prrc2c
Ptges3
Rab7
Rer1
Rfx3
Rnf7
Rpain
Sap18
Senp1
Sfmbt1
Sharpin
Sirt6
Slc35a2
Snai2
Sp1
Srsf5
Ss18
Stag2
Stip1
Stk11
Sys1
Tagln2
Tk1
Tlk2
Tmem30a
Traf2
Traf3
Tsc1
Tsc2
Ube2f
Ube2n
Usp34
Vcl
Vps51
Vps52
Wsb2
Zeb1
Zfp281
Zfx

## Sheet: Supplementary Data 1d
Supplementary Data 1d. GO term enrichment analysis of enriched genes.
Term	Overlap	P-value	Adjusted P-value	Odds Ratio	Combined Score	Genes
translation (GO:0006412)	120/214	6.86332e-104	1.72887e-100	30.3759	7215.58	RPL4;N6AMT1;RPL32;RPL31;RPL8;RPL10A;RPL9;YARS2;RPL6;RPL7;RPS15;RPS17;RPS19;RPS18;RPL36;RPL35;RPL37;RPS11;RPL39;RPS13;RARS2;RPL21;RPS7;RPL23;MRPS18A;RPSA;MRPS18C;TUFM;LARS2;RPL24;RPL26;RPL29;RPL28;UBA52;MRPL18;MRPL16;MRPL13;MRPL10;MRPL11;MRPL27;MRPL28;MRPL23;EEF2;MRPL24;RPS26;RPS25;RPS28;RPS27;COPS5;RSL24D1;FARSB;RPS23;MRPS17;HBS1L;MRPS15;MRPS16;GFM2;MRPS14;MRPS11;MRPS12;RPLP0;MRPL36;MRPL37;MRPL34…
ribosome biogenesis (GO:0042254)	108/192	1.40436e-93	1.76879e-90	30.1556	6447.28	RPL4;POP5;RPL32;RPL31;FCF1;PWP2;RPL10A;RPL8;RPL9;RPL6;RPL7;RRP9;RPS15;RPS17;RPS19;RPL36;RPL35;RPL37;RPL39;NOM1;RPL21;RPS7;IMP3;RPL23;WDR74;IMP4;EBNA1BP2;DKC1;RPL24;RPL26;RPL29;RPL28;UBA52;RPF2;EMG1;PDCD11;SURF6;UTP20;MDN1;NOP16;MRPL22;RCL1;RPS25;RPS28;TBL3;RPS27;EIF6;LAS1L;DDX49;PAK1IP1;WDR3;RPLP0;MRPL36;WDR43;RPL7A;RPLP2;RIOK1;RRP12;PELP1;UTP15;WDR36;DIS3;DDX54;URB2;DDX52;UTP18;LSG1;C1D;RPL37A;N…
mitochondrial translation (GO:0032543)	84/105	2.38058e-93	1.9989e-90	91.4197	19497.4	MRPS17;GFM1;MRPS15;MRPS16;GFM2;MRPS14;MRPS11;MRPS12;MRPL38;MRPL39;MRPS10;MRPL36;MRPL37;MRPL34;MRPL35;MRPL32;MRPL33;MRPL4;MRPL41;MRPL3;MRPL42;MRPL2;MRPL40;MRPL9;RARS2;MRPS28;TSFM;MRPS26;MRPS27;MRPS24;MRPS25;MRPL49;MRPS18A;MRPS2;MRPS21;MRPL47;MRPL48;MRPL45;MRPS7;QRSL1;MRPL46;MRPS6;MRPL43;MRPS5;MRPS18C;TUFM;MRPL44;MRPL52;LARS2;MRPL53;MRPL51;NOA1;MTRF1L;DAP3;MRPS35;MRPL18;MRPS33;MRPL19;MRPS34;MRPL16;…
rRNA processing (GO:0006364)	103/173	8.33034e-93	5.24603e-90	34.3249	7277.58	RPL4;POP5;RPL32;RPL31;FCF1;PWP2;RPL10A;RPL8;RPL9;RPL6;RPL7;RRP9;RPS15;RPS17;RPS19;RPL36;RPL35;RPL37;RPL39;RPL21;RPS7;IMP3;RPL23;WDR74;IMP4;EBNA1BP2;DKC1;NHP2;RPL24;RPL26;RPL29;RPL28;UBA52;NOP2;EMG1;PDCD11;UTP20;MDN1;RCL1;RPS25;RPS28;TBL3;LSM6;RPS27;EIF6;LAS1L;DDX49;WDR3;RPLP0;NAT10;TFB1M;WDR43;RPL7A;RPLP2;RIOK1;RRP12;RRP15;PELP1;UTP15;WDR36;DIS3;DDX54;DDX52;UTP18;NSA2;C1D;RPL37A;DDX27;RPL12;HEATR…
mitochondrial translational elongation (GO:0070125)	75/89	9.15374e-87	4.61165e-84	121.174	24005.9	MRPS17;GFM1;MRPS15;MRPS16;GFM2;MRPS14;MRPS11;MRPS12;MRPL38;MRPL39;MRPS10;MRPL36;MRPL37;MRPL34;MRPL35;MRPL32;MRPL33;MRPL4;MRPL41;MRPL3;MRPL42;MRPL2;MRPL40;MRPL9;MRPS28;TSFM;MRPS26;MRPS27;MRPS24;MRPS25;MRPL49;MRPS18A;MRPS2;MRPS21;MRPL47;MRPL48;MRPL45;MRPS7;MRPL46;MRPS6;MRPL43;MRPS5;MRPL44;MRPS18C;TUFM;MRPL52;MRPL53;MRPL51;DAP3;MRPS35;MRPL18;MRPS33;MRPL19;MRPS34;MRPL16;MRPL17;MRPL14;MRPL15;MRPS30;MR…
translational termination (GO:0006415)	77/96	9.74678e-86	4.09203e-83	91.8613	17981.4	MRPS17;N6AMT1;MRPS15;MRPS16;GFM2;MRPS14;MRPS11;MRPS12;MRPL38;MRPL39;MRPS10;MRPL36;MRPL37;MRPL34;MRPL35;MRPL32;MRPL33;MRPL4;MRPL41;MRPL3;MRPL42;TRMT112;MRPL2;MRPL40;MRPL9;MRPS28;MRPS26;MRPS27;MRPS24;MRPS25;MRPL49;MRPS18A;MRPS2;MRPS21;MRPL47;MRPL48;MRPL45;MRPS7;MRPL46;MRPS6;MRPL43;MRPS5;MRPL44;MRPS18C;MRPL52;MRPL53;MRPL51;ETF1;MTRF1L;DAP3;MRPS35;MRPL18;MRPS33;MRPL19;MRPS34;MRPL16;MRPL17;MRPL14;MRPL…
rRNA metabolic process (GO:0016072)	94/162	3.78532e-83	1.36217e-80	31.8981	6053.74	RPL4;POP5;DDX49;RPL32;RPL31;WDR3;DIS3L;RPLP0;FCF1;PWP2;RPL10A;RPL8;RPL9;RPL6;WDR43;RPL7;RRP9;RPS15;RPL7A;RPS17;RPS19;RPL36;RPL35;RPLP2;RPL37;RRP12;RPL39;PELP1;UTP15;WDR36;RPL21;RPS7;IMP3;DIS3;RPL23;WDR74;DDX54;IMP4;DDX52;UTP18;EBNA1BP2;DKC1;C1D;RPL37A;RPL24;RPL26;RPL29;RPL28;UBA52;DDX27;RPL12;HEATR1;RPL11;RPL36A;NOC4L;NOL6;EXOSC7;EMG1;EXOSC10;EXOSC4;PDCD11;BMS1;EXOSC9;PES1;EXOSC8;RPL14;RPL13;UTP2…
mitochondrial translational termination (GO:0070126)	73/89	1.08255e-82	3.40869e-80	102.945	19429.1	MRPS17;MRPS15;MRPS16;GFM2;MRPS14;MRPS11;MRPS12;MRPL38;MRPL39;MRPS10;MRPL36;MRPL37;MRPL34;MRPL35;MRPL32;MRPL33;MRPL4;MRPL41;MRPL3;MRPL42;MRPL2;MRPL40;MRPL9;MRPS28;MRPS26;MRPS27;MRPS24;MRPS25;MRPL49;MRPS18A;MRPS2;MRPS21;MRPL47;MRPL48;MRPL45;MRPS7;MRPL46;MRPS6;MRPL43;MRPS5;MRPL44;MRPS18C;MRPL52;MRPL53;MRPL51;MTRF1L;DAP3;MRPS35;MRPL18;MRPS33;MRPL19;MRPS34;MRPL16;MRPL17;MRPL14;MRPL15;MRPS30;MRPL12;MRP…
cellular macromolecule biosynthetic process (GO:0034645)	123/314	2.69349e-82	7.53879e-80	15.3024	2874.11	RPL4;RPL32;RPL31;RPL8;RPL10A;RPL9;YARS2;RPL6;RPL7;RPS15;RPS17;KAT5;RPS19;RPS18;RPL36;RPL35;RPL37;RPS11;RPL39;RPS13;RPL21;RPS7;RPL23;MRPS18A;RPSA;MRPS18C;TUFM;RRAGC;GRWD1;RPL24;RPL26;RPL29;RPL28;SET;MRPL18;MRPL13;MRPL10;MRPL11;ORC5;ORC4;ORC6;ORC3;MRPL27;MRPL28;CDC7;MRPL23;EEF2;MRPL24;RPS26;RPS25;RPS28;RPS27;COPS5;MMS19;RSL24D1;FARSB;RPS23;MRPS17;HBS1L;FEN1;MRPS15;MRPS16;MCM7;MRPS14;MRPS11;MRPS12;R…
translational elongation (GO:0006414)	77/104	8.05861e-81	2.02996e-78	64.616	11916.6	MRPS17;GFM1;MRPS15;MRPS16;GFM2;MRPS14;MRPS11;MRPS12;MRPL38;MRPL39;MRPS10;MRPL36;MRPL37;MRPL34;MRPL35;MRPL32;MRPL33;MRPL4;MRPL41;MRPL3;MRPL42;MRPL2;MRPL40;MRPL9;MRPS28;TSFM;MRPS26;MRPS27;MRPS24;MRPS25;MRPL49;MRPS18A;MRPS2;MRPS21;MRPL47;MRPL48;MRPL45;MRPS7;MRPL46;MRPS6;MRPL43;MRPS5;MRPS18C;TUFM;MRPL44;EEF1G;MRPL52;MRPL53;MRPL51;DAP3;MRPS35;MRPL18;MRPS33;MRPL19;MRPS34;MRPL16;MRPL17;MRPL14;MRPL15;MRP…
peptide biosynthetic process (GO:0043043)	89/162	8.94882e-76	2.04928e-73	27.9558	4830.9	RPL4;MRPS17;HBS1L;MRPS15;MRPS16;RPL32;RPL31;MRPS14;MRPS11;MRPS12;RPLP0;MRPL36;MRPL37;RPL10A;RPL8;MRPL34;RPL9;YARS2;MRPL35;RPL6;MRPL32;RPL7;RPS15;MRPL41;RPS4X;MRPL3;MRPL42;RPL7A;RPS17;RPS19;RPS18;RPL36;RPL35;RPLP2;RPL37;MRPL9;RPS11;RPL39;RPS13;RPL21;RPS7;RPL23;DHPS;MRPS18A;MRPS21;RPSA;MRPS7;MRPS6;MRPL43;MRPS5;MRPS18C;MRPL52;MRPL51;RPL37A;RPL24;RPL26;RPL29;RPL28;MRPL18;MRPS33;RPL12;RPL11;RPL36A;MRP…
ncRNA processing (GO:0034470)	97/201	2.10666e-75	4.42224e-73	21.5598	3707.19	RPL4;POP5;RPL32;RPL31;FCF1;PWP2;RPL8;RPL10A;RPL9;RPL6;RPL7;RRP9;THG1L;RPS15;RPS17;RPS19;RPL36;RPL35;RPL37;RPL39;RPL21;RPS7;IMP3;RPL23;WDR74;IMP4;EBNA1BP2;DKC1;RPL24;RPL26;RPL29;RPL28;UBA52;EMG1;PDCD11;UTP20;MDN1;INTS2;RCL1;RPS25;RPS28;TBL3;RPS27;LAS1L;DDX49;WDR3;RPLP0;WDR43;FARS2;RPL7A;RPLP2;RRP12;PELP1;UTP15;WDR36;DIS3;DDX54;DDX52;UTP18;MRPL44;C1D;RPL37A;DDX27;RPL12;HEATR1;RPL11;RPL36A;NOC4L;NOL…
gene expression (GO:0010467)	120/356	2.00847e-71	3.8918e-69	12.0084	1954.8	RPL4;RPL32;RPL31;HNRNPU;RPL8;RPL10A;RPL9;YARS2;RPL6;RPL7;RPS15;RPS17;RPS19;RPS18;MAGOH;RPL36;RPL35;RPL37;RPS11;RPL39;RPS13;NUP214;RPL21;RPS7;RPL23;MRPS18A;RPSA;THOC3;MRPS18C;SRRM1;RRAGC;DKC1;SRSF2;RPL24;SRSF3;RPL26;RPL29;RPL28;SRSF7;SEH1L;RBM8A;MRPL18;MRPL13;MRPL10;MRPL11;ALYREF;MRPL27;MRPL28;MRPL23;MRPL24;RPS26;RPS25;RPS28;RPS27;COPS5;HNRNPF;MMS19;RSL24D1;FARSB;RPS23;MRPS17;HBS1L;MRPS15;MRPS16;M…
SRP-dependent cotranslational protein targeting to membrane (GO:0006614)	51/90	1.25001e-44	2.24913e-42	28.7225	2903.57	RPL4;RPL32;RPL31;RPLP0;RPL10A;RPL8;RPL9;RPL6;RPL7;RPS15;RPS4X;RPL7A;SEC61A1;RPS17;RPS19;RPS18;RPL36;RPL35;RPLP2;RPL37;RPS11;RPL39;RPS13;RPL21;RPS7;RPL23;RPSA;RPL37A;RPL24;RPL26;RPL29;RPL28;UBA52;RPL12;RPL11;RPL36A;RPL14;RPS3;RPL13;RPL15;RPS2;RPL18;RPL17;RPL19;RPL35A;RPL23A;RPS26;RPS25;RPS28;RPS27;RPS23
nuclear-transcribed mRNA catabolic process, nonsense-mediated decay (GO:0000184)	56/113	1.45506e-44	2.44354e-42	21.6836	2188.71	RPL4;RPL32;RPL31;RPLP0;RPL10A;RPL8;RPL9;RPL6;RPL7;RPS15;RPS4X;RPL7A;RPS17;RPS19;RPS18;MAGOH;RPL36;RPL35;RPLP2;RPL37;RPS11;RPL39;RPS13;RPL21;RPS7;NCBP1;RPL23;RPSA;RPL37A;RPL24;ETF1;RPL26;PABPC1;RPL29;RPL28;UBA52;RBM8A;RPL12;RPL11;RPL36A;RPL14;RPS3;RPL13;RPL15;RPS2;RPL18;RPL17;RPL19;RPL35A;RPL23A;RPS26;RPS25;RPS28;RPS27;SKIV2L;RPS23
cytoplasmic translation (GO:0002181)	51/93	1.23994e-43	1.95213e-41	26.6667	2634.56	RPL4;RPL32;RPL31;RPLP0;RPL10A;RPL8;RPL9;RPL6;RPL7;RPS15;RPS4X;RPL7A;RPS17;RPS19;RPS18;RPL36;RPL35;RPL37;RPS11;RPL39;RPS13;RPL21;RPS7;RPL23;RPSA;RPL37A;RPL24;ETF1;RPL26;RPL29;RPL28;UBA52;RPL12;RPL11;RPL36A;RPL14;RPS3;RPL13;RPL15;RPS2;RPL18;RPL17;RPL19;RPL35A;RPL23A;RPS26;RPS25;RPS28;RPS27;EIF3I;RPS23
cotranslational protein targeting to membrane (GO:0006613)	51/94	2.59505e-43	3.84525e-41	26.0451	2553.92	RPL4;RPL32;RPL31;RPLP0;RPL10A;RPL8;RPL9;RPL6;RPL7;RPS15;RPS4X;RPL7A;SEC61A1;RPS17;RPS19;RPS18;RPL36;RPL35;RPLP2;RPL37;RPS11;RPL39;RPS13;RPL21;RPS7;RPL23;RPSA;RPL37A;RPL24;RPL26;RPL29;RPL28;UBA52;RPL12;RPL11;RPL36A;RPL14;RPS3;RPL13;RPL15;RPS2;RPL18;RPL17;RPL19;RPL35A;RPL23A;RPS26;RPS25;RPS28;RPS27;RPS23
protein targeting to ER (GO:0045047)	51/103	1.19605e-40	1.6738e-38	21.5271	1978.87	RPL4;RPL32;RPL31;RPLP0;RPL10A;RPL8;RPL9;RPL6;RPL7;RPS15;RPS4X;RPL7A;SEC61A1;RPS17;RPS19;RPS18;RPL36;RPL35;RPLP2;RPL37;RPS11;RPL39;RPS13;RPL21;RPS7;RPL23;RPSA;RPL37A;RPL24;RPL26;RPL29;RPL28;UBA52;RPL12;RPL11;RPL36A;RPL14;RPS3;RPL13;RPL15;RPS2;RPL18;RPL17;RPL19;RPL35A;RPL23A;RPS26;RPS25;RPS28;RPS27;RPS23
mitochondrial gene expression (GO:0140053)	35/42	1.53796e-40	2.03901e-38	108.012	9901.82	MRPS17;MRPS15;MRPS16;GFM2;MRPS14;MRPS11;MRPS12;MRPS34;MRPL16;MRPL12;MRPL57;MRPL2;IARS2;TEFM;MRPS28;PTCD3;RARS2;MRPS24;GATC;GATB;MRPS18A;MRPS2;MRPS21;MRPL47;TFB2M;MRPL23;MRPS7;POLRMT;QRSL1;MRPS6;LARS2;MRPL51;NOA1;FASTKD5;TFAM
nuclear-transcribed mRNA catabolic process (GO:0000956)	63/171	2.73177e-40	3.44066e-38	12.9452	1179.29	RPL4;RPL32;RPL31;RPLP0;RPL10A;RPL8;RPL9;RPL6;RPL7;RPS15;RPS4X;RPL7A;RPS17;RPS19;RPS18;MAGOH;RPL36;RPL35;RPLP2;RPL37;MTPAP;RPS11;RPL39;RPS13;RPL21;RPS7;NCBP1;RPL23;RPSA;RPL37A;RPL24;ETF1;RPL26;PABPC1;RPL29;RPL28;UBA52;RBM8A;RPL12;RPL11;RPL36A;EXOSC7;EXOSC10;EXOSC4;EXOSC9;EXOSC8;POLR2D;RPL14;RPS3;RPL13;POLR2G;RPL15;RPS2;RPL18;RPL17;RPL19;RPL35A;RPL23A;RPS26;RPS25;RPS28;RPS27;RPS23
cellular protein metabolic process (GO:0044267)	95/417	5.55676e-40	6.66546e-38	6.72513	607.874	RPL4;MRPS17;HBS1L;MRPS15;MRPS16;RPL32;RPL31;MRPS14;MRPS11;RPLP0;MRPS12;MRPL36;MRPL37;RPL8;MRPL34;RPL10A;RPL9;MRPL35;YARS2;RPL6;MRPL32;RPL7;UBE2L3;MRPL41;RPS15;RPS4X;MRPL42;MRPL3;RPL7A;RPS17;RPS19;RPS18;FDXR;RPL36;RPL35;RPLP2;RPL37;MRPL9;RPS11;RPL39;RPS13;RPL21;RPS7;RPL23;DHPS;MRPS18A;MRPS21;RPSA;MRPS7;MRPS6;MRPL43;MRPS5;MRPS18C;MRPL52;MRPL51;RPL37A;RPL24;RPL26;RPL29;RPL28;UBA52;MRPL18;RPL12;MRPS3…
ribosomal large subunit biogenesis (GO:0042273)	36/57	2.9096e-34	3.33149e-32	37.0476	2860.81	PAK1IP1;NIP7;RPLP0;MAK16;NOP2;RPL11;PPAN;MALSU1;RPL10A;RPF2;SDAD1;RPL6;RPL7;RPL7A;MRPL20;PES1;RPL14;SURF6;RRP15;MDN1;NOP16;WDR74;RPL35A;RPL23A;WDR12;NLE1;BOP1;RSL1D1;EBNA1BP2;NSA2;EIF6;LAS1L;NHP2;RPL24;RPL26;RSL24D1
mRNA splicing, via spliceosome (GO:0000398)	68/274	3.25042e-31	3.55992e-29	7.33049	514.61	DBR1;GEMIN2;DDX42;HNRNPU;PPWD1;WDR83;CWC25;PRPF19;USP39;EFTUD2;PTBP1;METTL14;SNRPD2;SNRPD1;RBMX2;MAGOH;CWC22;SNRPD3;PRMT5;NCBP1;RBM19;PRPF40A;CRNKL1;SRRM1;WDR77;PRPF3;SNRPG;SRSF2;CD2BP2;SRSF3;PABPC1;SNRPF;CACTIN;GEMIN8;SRSF7;SF3B4;SF3B5;RBM8A;SF3B6;SRSF1;DDX20;RNPC3;PRPF8;POLR2B;U2AF2;POLR2C;POLR2D;POLR2G;SF3B1;SRSF10;POLR2K;SF3A1;PPIL1;PRPF38A;ALYREF;LSM5;LSM3;U2SURP;CHERP;LSM2;SMU1;NUDT21;LSM8;…
mRNA processing (GO:0006397)	71/300	3.84433e-31	4.03495e-29	6.90113	483.31	DBR1;CCNH;GEMIN2;DDX42;HNRNPU;PPWD1;WDR83;CWC25;PRPF19;USP39;EFTUD2;PTBP1;METTL14;SNRPD2;SNRPD1;RBMX2;MAGOH;CWC22;SNRPD3;CMTR1;NCBP1;RBM19;PRPF40A;THOC3;CRNKL1;SRRM1;PRPF18;PRPF3;SNRPG;SRSF2;CD2BP2;SRSF3;PABPC1;SNRPF;CACTIN;SRSF7;SF3B4;SF3B5;RBM8A;SF3B6;SRSF1;RNPC3;PRPF8;POLR2B;U2AF2;POLR2C;POLR2D;RPRD1B;POLR2G;SF3B1;SRSF10;POLR2K;SF3A1;PPIL1;PRPF38A;ALYREF;LSM5;GTF2H4;GTF2H5;LSM3;U2SURP;CHERP;LS…
RNA splicing, via transesterification reactions with bulged adenosine as nucleophile (GO:0000377)	63/251	2.73616e-29	2.75696e-27	7.40526	487.032	DBR1;DDX42;HNRNPU;PPWD1;WDR83;CWC25;PRPF19;USP39;EFTUD2;PTBP1;METTL14;SNRPD2;SNRPD1;RBMX2;MAGOH;CWC22;SNRPD3;NCBP1;RBM19;PRPF40A;CRNKL1;SRRM1;PRPF3;SNRPG;SRSF2;CD2BP2;SRSF3;PABPC1;SNRPF;CACTIN;SRSF7;SF3B4;SF3B5;RBM8A;SF3B6;SRSF1;RNPC3;PRPF8;POLR2B;U2AF2;POLR2C;POLR2D;POLR2G;SF3B1;SRSF10;POLR2K;SF3A1;PPIL1;PRPF38A;ALYREF;LSM5;LSM3;U2SURP;CHERP;LSM2;SMU1;NUDT21;LSM8;SNRNP40;SNW1;LSM6;HNRNPF;CWF19L1
ribonucleoprotein complex assembly (GO:0022618)	46/136	8.07741e-28	7.82577e-26	11.1319	694.445	GEMIN2;MRPS11;NOP2;RPLP0;RPL11;SRSF1;PPAN;DDX20;PWP2;RPF2;PRPF19;USP39;RPL6;RPS15;MRPL20;RPS19;SNRPD2;SNRPD1;POLR2D;SNRPD3;SF3B1;SRSF10;MDN1;ABT1;PRMT5;NCBP1;RPSA;RPL23A;ERAL1;MRPS7;CRNKL1;NLE1;WDR77;BOP1;NUDT21;RPS28;RPS27;PRPF18;EIF6;SNRPG;RPL24;NAF1;SNRPF;GEMIN8;RSL24D1;EIF3A
maturation of LSU-rRNA (GO:0000470)	22/26	3.56873e-26	3.3295e-24	117.108	6861.96	DDX18;NIFK;MAK16;NOP2;URB1;RPF2;RPL10A;WDR12;RPL7;FTSJ3;RPL7A;BOP1;RSL1D1;NSA2;EIF6;LAS1L;PES1;ZNHIT6;RPL7L1;NHP2;RPL35;RRP15
ribosome assembly (GO:0042255)	27/50	2.00803e-23	1.80651e-21	25.1107	1312.34	DDX3X;MRPS11;RPLP0;NOP2;RPL11;PPAN;PWP2;RPF2;RPL6;RPS15;MRPL20;RPS19;C1QBP;MDN1;MRPS2;RPSA;RPL23A;ERAL1;MRPS7;NLE1;MRPL22;BOP1;RPS28;RPS27;EIF6;RPL24;RSL24D1
ribonucleoprotein complex biogenesis (GO:0022613)	29/60	2.97313e-23	2.58252e-21	20.0471	1039.84	PAK1IP1;NIP7;RPL11;MRPL36;MALSU1;RPF2;SDAD1;RPL7;RPS15;RPS17;EMG1;RPS19;PES1;RPL14;SURF6;RIOK1;NOM1;RPS7;NOP16;WDR74;RPL35A;URB2;WDR12;BOP1;RPS25;EBNA1BP2;RPS28;NAF1;RPL26
RNA processing (GO:0006396)	41/179	6.45677e-18	5.42153e-16	6.41766	254.02	SF3B4;NUFIP1;RBM8A;GEMIN2;SRSF1;DDX20;HNRNPU;RNPC3;USP39;PRPF8;PTBP1;SNRPD2;SNRPD1;U2AF2;MAGOH;SNRPD3;MTPAP;SF3B1;SF3A1;NCBP1;DDX54;USB1;LSM5;LSM3;SRRM1;MRPL44;SMU1;NUDT21;SNRNP40;LSM6;PRPF18;RRAGC;DKC1;PRPF3;HNRNPF;SNRPG;SRSF2;FASTKD5;SNRPF;NRDE2;SRSF7
mitochondrion organization (GO:0007005)	40/175	1.77459e-17	1.442e-15	6.39399	246.619	TOMM40;TIMM9;TIMM13;NRF1;PHB;TIMM10;TFB1M;PHB2;TOMM20;HSD17B10;HK2;THG1L;TOMM22;TIMM50;HSPD1;CHCHD4;SAMM50;AIFM1;OPA1;MSTO1;LONP1;USP30;DNM1L;PNPT1;MTX2;VPS13D;TIMM22;TFB2M;POLRMT;ATAD3A;PISD;DNM2;TIMM10B;SUPV3L1;POLG2;TOMM7;TFAM;CYCS;NDUFS1;SSBP1
mitochondrial ATP synthesis coupled electron transport (GO:0042775)	26/71	2.79378e-17	2.19923e-15	12.3309	470.011	NDUFB9;COX7B;NDUFA13;NDUFA11;UQCRB;NDUFB5;UQCR10;COX5B;COX7C;UQCRFS1;CYC1;COA6;COX10;NDUFA8;NDUFA6;NDUFA1;NDUFC2;COX6C;COX6B1;NDUFS8;NDUFS7;UQCRQ;UQCRC1;CYCS;NDUFS1;UQCRC2
DNA-dependent DNA replication (GO:0006261)	34/129	4.39279e-17	3.35316e-15	7.68704	289.525	PRIM2;MCM7;DDX21;MCM10;ORC5;ORC4;ORC6;CDC45;PSMD2;ORC3;POLD1;MCMBP;TEFM;GINS1;GINS2;RFC2;GINS3;GINS4;CDC7;NOC3L;PSMA5;PSMA6;PSMC5;DBF4;PSMA4;POLG2;PSMC1;PSMC2;MCM3;MCM4;MCM5;SSBP1;UBA52;MCM2
aerobic electron transport chain (GO:0019646)	25/70	2.29106e-16	1.6974e-14	11.8433	426.507	NDUFB9;COX7B;NDUFA13;NDUFA11;UQCRB;NDUFB5;UQCR10;COX5B;COX7C;UQCRFS1;CYC1;COX10;NDUFA8;NDUFA6;NDUFA1;NDUFC2;COX6C;COX6B1;NDUFS8;NDUFS7;UQCRQ;UQCRC1;CYCS;NDUFS1;UQCRC2
RNA splicing (GO:0008380)	29/98	3.0461e-16	2.19232e-14	8.98872	321.144	SF3B4;DBR1;RBM8A;GEMIN2;WDR83;RNPC3;USP39;PRPF8;PTBP1;SNRPD2;SNRPD1;MAGOH;SNRPD3;SF3B1;SRSF10;NCBP1;USB1;SRRM1;SMU1;SNRNP40;LSM6;PRPF18;RRAGC;PRPF3;SNRPG;SRSF2;SNRPF;NRDE2;SRSF7
ribosomal small subunit biogenesis (GO:0042274)	19/40	1.64644e-15	1.15205e-13	19.1832	652.998	NOM1;RPS7;MRPS11;WDR3;RPSA;DDX52;ERAL1;PWP2;MRPS7;RPS15;RPS25;EMG1;RPS17;RPS28;LSM6;RPS27;RPS19;SURF6;RIOK1
mitochondrial respiratory chain complex assembly (GO:0033108)	27/90	2.20714e-15	1.50264e-13	9.14815	308.723	COX19;NDUFB9;NDUFA13;NDUFA11;COX16;NDUFB5;COX18;COX17;PET117;CHCHD4;SAMM50;AIFM1;UQCRFS1;COA5;NDUFA8;NDUFA6;PET100;UQCC2;UQCC1;NDUFA1;NDUFC2;NDUFS8;NDUFS7;SCO1;SCO2;NDUFAF7;NDUFS1
maturation of LSU-rRNA from tricistronic rRNA transcript (SSU-rRNA, 5.8S rRNA, LSU-rRNA) (GO:0000463)	12/14	6.81602e-15	4.5183e-13	126.358	4121.72	DDX18;BOP1;NIFK;PES1;RPL7L1;ZNHIT6;RPL35;URB1;RPF2;WDR12;FTSJ3;RPL7
ribosomal large subunit assembly (GO:0000027)	15/25	1.60635e-14	1.03754e-12	31.6811	1006.26	DDX28;NOP2;RPL11;RPLP0;PPAN;RPL23A;RPF2;RPL6;NLE1;DHX30;MRPL20;BOP1;RPL24;RSL24D1;MDN1
mRNA metabolic process (GO:0016071)	26/95	8.27191e-14	5.20924e-12	8.03175	241.943	SF3B4;GEMIN2;SRSF1;USP39;PRPF8;LSM10;PTBP1;LSM11;U2AF2;SNRPD3;METTL16;SF3A1;PNPT1;SSB;NCBP1;LSM5;LSM3;LSM2;NUDT21;PRPF18;LSM6;PRPF3;SNRPG;SRSF2;SNRPF;SRSF7
protein targeting to mitochondrion (GO:0006626)	20/55	1.54414e-13	9.48703e-12	12.1203	357.537	MIPEP;NDUFA13;TOMM40;TIMM9;TIMM13;TIMM22;TIMM10;TOMM20;TOMM22;HSPD1;TIMM50;CHCHD4;TIMM10B;SAMM50;AIFM1;GRPEL1;TOMM7;PMPCB;PMPCA;ROMO1
tRNA processing (GO:0008033)	21/64	3.97355e-13	2.38318e-11	10.3658	295.984	POP5;PTCD1;AARS2;SSB;TRMT10C;ELAC2;URM1;RTCB;ZBTB8OS;TRNT1;ELP5;ADAT3;TRIT1;FARS2;THG1L;ADAT2;CTU2;CTU1;TRMT6;FAM98B;TRMT61A
maturation of 5.8S rRNA (GO:0000460)	12/17	4.07794e-13	2.38892e-11	50.5351	1441.67	NSA2;EXOSC10;EXOSC4;EIF6;LAS1L;PES1;MAK16;C1D;URB1;WDR12;RRP15;FTSJ3
tRNA wobble base modification (GO:0002097)	11/14	5.76254e-13	3.29906e-11	77.1294	2173.68	CTU2;CTU1;MOCS3;URM1;DPH3;KTI12;ELP3;ELP4;MTO1;ADAT2;GTPBP3
regulation of telomerase RNA localization to Cajal body (GO:1904872)	12/18	1.17228e-12	6.56219e-11	42.1104	1156.86	CCT2;EXOSC10;DKC1;RUVBL2;TCP1;NHP2;NAF1;CCT8;CCT7;CCT5;NOP10;CCT4
positive regulation of telomerase RNA localization to Cajal body (GO:1904874)	11/15	2.07121e-12	1.13421e-10	57.844	1556.17	CCT2;DKC1;RUVBL2;TCP1;NHP2;NAF1;CCT8;CCT7;CCT5;NOP10;CCT4
spliceosomal snRNP assembly (GO:0000387)	16/38	2.93253e-12	1.57171e-10	15.3679	408.096	PRMT5;GEMIN2;DDX20;PRPF19;PRPF8;LSM2;WDR77;SNRPD2;SNRPD1;PRPF3;SNRPG;CD2BP2;SNRPD3;SNRPF;GEMIN8;SRSF10
transcription, DNA-templated (GO:0006351)	37/221	7.66632e-12	4.02322e-10	4.31344	110.399	GTF3C4;ELL;CBFB;CCNH;DDX21;WDR61;TTF2;MRPL12;POLR2B;TAF1C;POLR2C;POLR2D;NELFB;POLR2G;NELFCD;POLR2K;TEFM;ABT1;PRMT5;KLF13;TBP;NCBP1;TAF12;EAF1;SMARCA5;TFB2M;MED4;POLRMT;GTF2H4;GTF2H5;CDK9;DRAP1;TFDP1;RRAGC;MED20;TFAM;MMS19
nuclear-transcribed mRNA catabolic process, exonucleolytic (GO:0000291)	15/35	1.03641e-11	5.32802e-10	15.8322	400.439	HBS1L;DIS3;WDR61;LSM5;LSM3;LSM2;EXOSC7;EXOSC4;LSM6;EXOSC9;EXOSC8;POLR2G;SKIV2L;EXOSC2;EXOSC1
tRNA aminoacylation for protein translation (GO:0006418)	16/43	2.8163e-11	1.41885e-09	12.5187	304.116	RARS2;AARS2;PARS2;MARS2;DARS2;YARS2;FARS2;WARS2;LARS2;SARS2;NARS2;IARS2;TARS2;VARS2;CARS2;FARSB
tRNA wobble uridine modification (GO:0002098)	10/14	3.34836e-11	1.65383e-09	52.5275	1266.96	CTU2;CTU1;MOCS3;URM1;DPH3;KTI12;ELP3;ELP4;MTO1;GTPBP3
maturation of 5.8S rRNA from tricistronic rRNA transcript (SSU-rRNA, 5.8S rRNA, LSU-rRNA) (GO:0000466)	12/22	3.44302e-11	1.66788e-09	25.2609	608.588	ABT1;EXOSC7;EXOSC10;EXOSC9;PES1;EXOSC8;UTP20;URB1;WDR12;EXOSC2;NOP9;FTSJ3
regulation of transcription initiation from RNA polymerase II promoter (GO:0060260)	19/64	3.84368e-11	1.82683e-09	8.94087	214.42	MED1;CBFB;CCNC;HNF1B;MED27;MED4;MED15;MED7;MED12;MED23;MED14;MED13;MED24;CCND1;TRIM28;MED10;SUB1;MED20;MED31
DNA replication initiation (GO:0006270)	15/38	4.33747e-11	2.02335e-09	13.765	328.448	PRIM2;MCM7;MCM10;CDC7;NOC3L;ORC5;ORC4;CDC45;ORC6;DBF4;ORC3;MCM3;MCM4;MCM5;MCM2
RNA modification (GO:0009451)	18/58	5.49411e-11	2.5163e-09	9.521	224.931	AARS2;SSB;NSUN4;URM1;NOP2;NAT10;TFB1M;ELP5;ADAT3;TRIT1;THG1L;FTSJ3;ADAT2;CTU2;CTU1;TRMT6;TRMT61A;NOP10
exonucleolytic catabolism of deadenylated mRNA (GO:0043928)	14/33	6.0499e-11	2.72137e-09	15.5381	365.586	HBS1L;DIS3;WDR61;LSM5;LSM3;LSM2;EXOSC7;EXOSC4;LSM6;EXOSC9;EXOSC8;SKIV2L;EXOSC2;EXOSC1
transcription by RNA polymerase II (GO:0006366)	44/320	7.56368e-11	3.34261e-09	3.43027	79.9428	ELL;CBFB;CCNH;DDX21;WDR61;TTF2;LSM10;SNAPC5;LSM11;SNAPC1;POLR2B;TAF1C;POLR2C;POLR2D;NELFB;RPRD1B;POLR2G;SNRPD3;NELFCD;POLR2K;ABT1;MED1;KLF13;TBP;NCBP1;TAF12;EAF1;INTS2;ELP2;ELP4;MED4;MED27;GTF2H4;GTF2H5;MED7;MED23;CDK9;DRAP1;NUDT21;SNW1;TFDP1;MED20;SNRPG;SNRPF
regulation of DNA-templated transcription, initiation (GO:2000142)	18/61	1.40647e-10	6.10846e-09	8.85535	200.882	MED1;CBFB;CCNC;MED27;MED4;MED15;MED7;MED12;MED23;FOSL1;MED14;MED13;MED24;CCND1;TRIM28;MED10;MED20;MED31
maturation of SSU-rRNA (GO:0030490)	14/35	1.57293e-10	6.7156e-09	14.0568	317.303	UTP6;MRPS11;WDR3;HEATR1;NAT10;DDX52;PWP2;RPS28;LSM6;RPS19;BMS1;NOL10;RIOK1;DCAF13
double-strand break repair via break-induced replication (GO:0000727)	9/12	1.69009e-10	7.09557e-09	62.967	1416.82	GINS2;CDC45;MCM7;GINS4;MCM3;MCM4;CDC7;MCM5;MCM2
establishment of protein localization to mitochondrion (GO:0072655)	16/48	1.92902e-10	7.96589e-09	10.5599	236.212	TOMM40;TIMM9;TIMM13;TIMM22;TIMM10;TOMM20;HK2;HSPD1;TIMM50;TOMM22;CHCHD4;TIMM10B;AIFM1;GRPEL1;TOMM7;ROMO1
RNA metabolic process (GO:0016070)	26/133	3.1385e-10	1.27514e-08	5.169	113.109	FTO;DDX3X;NUFIP1;DDX20;HNRNPU;LAGE3;EXOSC7;PTBP1;METTL14;RNASEH1;POLR2B;POLR2C;POLR2D;POLR2G;POLR2K;PNPT1;NCBP1;WDR74;DDX54;MRPL44;SUPV3L1;LSM8;SNRNP40;DKC1;HNRNPF;SKIV2L
regulation of mitochondrial translation (GO:0070129)	11/21	4.15012e-10	1.63346e-08	23.1303	499.678	RPUSD4;TRUB2;TSFM;NGRN;MRPS27;TRMT10C;UQCC2;MTG1;C1QBP;MTG2;MALSU1
rRNA modification (GO:0000154)	11/21	4.15012e-10	1.63346e-08	23.1303	499.678	TRMT112;NSUN4;DIMT1;DKC1;MTERF4;NHP2;NAT10;TFB2M;TFB1M;NOP10;FTSJ3
regulation of signal transduction by p53 class mediator (GO:1901796)	28/156	5.23109e-10	2.02725e-08	4.65864	99.5608	MEAF6;PAK1IP1;NOP2;RPL11;CHD4;RPF2;AURKA;RPS15;KAT5;RPL37;MTA2;MAP2K6;PRMT5;BRPF1;TBP;TAF12;PDPK1;RFC2;RPL23;TOP3A;MAPK14;MTOR;TPX2;BOP1;RAD50;KAT6A;CSNK2B;PIN1
DNA replication (GO:0006260)	23/108	5.60937e-10	2.14091e-08	5.74342	122.343	FEN1;SET;MCM7;RFC2;TOP3A;CDC7;MCM10;ORC5;ORC4;RAD50;ORC6;DBF4;CDC45;KAT5;POLG2;GRWD1;ORC3;POLD1;MCM3;MCMBP;MCM4;MCM5;MCM2
ribosomal small subunit assembly (GO:0000028)	10/17	5.73384e-10	2.15575e-08	30.011	638.618	ABT1;RPS15;RPS28;RPS27;RPS19;MRPS11;RPSA;ERAL1;MRPS7;PWP2
respiratory chain complex IV assembly (GO:0008535)	11/23	1.46168e-09	5.41467e-08	19.2732	392.089	COX19;COX16;PET100;SCO1;SCO2;COX18;COX17;PET117;COA6;COX10;COA5
histone acetylation (GO:0016573)	18/71	2.15764e-09	7.87694e-08	7.18075	143.287	NAA50;DR1;BRPF1;MEAF6;TAF12;TRRAP;ACTL6A;YEATS4;TADA2A;KAT5;YEATS2;RUVBL2;KAT6A;TADA3;WDR5;EP400;BRD8;DMAP1
protein insertion into mitochondrial membrane (GO:0051204)	11/24	2.58663e-09	9.30819e-08	17.7898	351.755	TIMM10B;NDUFA13;BCL2L11;SAMM50;COX18;TIMM9;TIMM13;TIMM22;ROMO1;TIMM10;TOMM22
pre-replicative complex assembly (GO:0036388)	17/64	2.76996e-09	9.8275e-08	7.64151	150.572	MCM7;PSMA5;ORC5;PSMA6;ORC4;PSMC5;PSMA4;ORC6;PSMD2;ORC3;PSMC1;PSMC2;MCM3;MCM4;MCM5;UBA52;MCM2
maturation of SSU-rRNA from tricistronic rRNA transcript (SSU-rRNA, 5.8S rRNA, LSU-rRNA) (GO:0000462)	12/30	3.27533e-09	1.14591e-07	14.028	274.062	ABT1;UTP6;TBL3;RPS19;MRPS11;BMS1;HEATR1;UTP20;NOL10;PWP2;NOP9;DCAF13
transcription elongation from RNA polymerase II promoter (GO:0006368)	17/67	5.94568e-09	2.05167e-07	7.18189	136.029	ELL;NCBP1;CCNH;EAF1;ELP2;WDR61;ELP4;GTF2H4;GTF2H5;CDK9;POLR2B;POLR2C;POLR2D;NELFB;POLR2G;NELFCD;POLR2K
tRNA aminoacylation (GO:0043039)	13/38	6.86134e-09	2.33564e-07	10.9499	205.829	RARS2;MARS2;GATC;DARS2;GATB;QRSL1;YARS2;FARS2;WARS2;LARS2;SARS2;IARS2;FARSB
RNA methylation (GO:0001510)	16/60	7.6212e-09	2.55971e-07	7.67507	143.465	TRMT10C;NSUN4;DIMT1;NOP2;MTERF4;TFB2M;TFB1M;MTO1;FTSJ3;GTPBP3;TRMT112;METTL14;TRMT6;METTL16;CMTR1;TRMT61A
mitochondrial electron transport, ubiquinol to cytochrome c (GO:0006122)	8/12	8.02904e-09	2.62664e-07	41.9297	781.577	UQCRB;UQCRQ;UQCRC1;CYCS;UQCRFS1;CYC1;UQCR10;UQCRC2
positive regulation of protein localization to chromosome, telomeric region (GO:1904816)	8/12	8.02904e-09	2.62664e-07	41.9297	781.577	CCT2;DKC1;TCP1;CCT8;CCT7;CCT5;CCT4;GNL3
tRNA 3'-end processing (GO:0042780)	6/6	9.20493e-09	2.97272e-07	114492	2.11851e+06	PTCD1;SSB;TRMT10C;ELAC2;TRNT1;HSD17B10
DNA-templated transcription, elongation (GO:0006354)	17/69	9.64719e-09	3.07611e-07	6.90493	127.442	ELL;NCBP1;CCNH;EAF1;ELP2;WDR61;ELP4;GTF2H4;GTF2H5;CDK9;POLR2B;POLR2C;POLR2D;NELFB;POLR2G;NELFCD;POLR2K
rRNA methylation (GO:0031167)	10/22	1.54513e-08	4.86522e-07	17.5018	314.781	TRMT112;EMG1;NSUN4;DIMT1;MTERF4;NOP2;TFB2M;TFB1M;METTL16;FTSJ3
nuclear-transcribed mRNA catabolic process, deadenylation-dependent decay (GO:0000288)	15/56	2.09834e-08	6.52557e-07	7.71453	136.389	HBS1L;DIS3;WDR61;LSM5;LSM3;LSM2;EXOSC7;EXOSC4;LSM6;EXOSC9;EXOSC8;POLR2D;SKIV2L;EXOSC2;EXOSC1
positive regulation of transcription initiation from RNA polymerase II promoter (GO:0060261)	10/23	2.62127e-08	8.0524e-07	16.1547	282.013	MED12;MED1;MED14;PSMC5;MED13;MED24;SUB1;PSMC2;HNF1B;MED4
tRNA modification (GO:0006400)	16/65	2.66054e-08	8.07459e-07	6.89009	120.178	MOCS3;AARS2;SSB;URM1;ELP5;MTO1;ADAT3;TRIT1;THG1L;GTPBP3;ADAT2;TRMT112;CTU2;CTU1;TRMT6;TRMT61A
positive regulation of establishment of protein localization to telomere (GO:1904851)	7/10	4.45996e-08	1.33746e-06	48.8668	827.097	CCT2;DKC1;TCP1;CCT8;CCT7;CCT5;CCT4
regulation of mRNA stability (GO:0043488)	24/146	5.23446e-08	1.55125e-06	4.17208	69.9466	NUP214;FTO;SET;DIS3;ROCK2;HNRNPU;PSMA5;EXOSC7;EIF4ENIF1;PSMA6;METTL14;PSMC5;PSMA4;EXOSC4;PSMD2;EXOSC9;PSMC1;EXOSC8;PSMC2;PABPC1;METTL16;UBA52;EXOSC2;EXOSC1
DNA metabolic process (GO:0006259)	35/277	5.85264e-08	1.71428e-06	3.08584	51.3909	PRIM2;FEN1;MCM7;TRRAP;DDX21;MCM10;HMGB1;TYMS;ORC5;ORC4;ORC6;RNASEH1;CDC45;KAT5;TRIM28;ORC3;POLD1;LONP1;RFC2;TOP3A;CDC7;LIG3;NOC3L;SMC1A;GTF2H4;HINFP;SUPV3L1;RAD50;DBF4;MCM3;MCM4;MMS19;MCM5;UBA52;MCM2
RNA 3'-end processing (GO:0031123)	16/69	6.61021e-08	1.91392e-06	6.36874	105.288	PNPT1;NCBP1;RBM8A;ALYREF;SRSF1;THOC3;SRRM1;SUPV3L1;NUDT21;U2AF2;MAGOH;SRSF2;SRSF3;RPRD1B;MTPAP;SRSF7
RNA splicing, via transesterification reactions (GO:0000375)	10/25	6.88631e-08	1.97121e-06	13.9993	230.864	SF3B4;DBR1;SNRNP40;GEMIN2;PRPF3;WDR83;PRPF8;SF3B1;SRSF10;SRRM1
mRNA 3'-end processing (GO:0031124)	17/79	8.38882e-08	2.37432e-06	5.78819	94.3115	NCBP1;RBM8A;ALYREF;SRSF1;THOC3;SRRM1;NUDT21;LSM11;U2AF2;MAGOH;POLR2D;SRSF2;SRSF3;RPRD1B;PABPC1;MTPAP;SRSF7
mitochondrial RNA metabolic process (GO:0000959)	8/15	9.2246e-08	2.55939e-06	23.956	388.059	PNPT1;FASTKD5;TFAM;TFB2M;MRPL12;POLRMT;TFB1M;TEFM
mitochondrial cytochrome c oxidase assembly (GO:0033617)	9/20	9.24592e-08	2.55939e-06	17.1656	278.023	COX19;COX16;PET100;SCO1;SCO2;COX18;COX17;PET117;COA5
nucleic acid metabolic process (GO:0090304)	16/71	1.01479e-07	2.77854e-06	6.1365	98.8187	FEN1;NCBP1;WDR74;HNRNPU;DDX54;PTBP1;LSM8;METTL14;RAD50;POLR2B;POLR2C;HNRNPF;POLR2D;POLR2G;MMS19;POLR2K
regulation of establishment of protein localization to telomere (GO:0070203)	7/11	1.1777e-07	3.12276e-06	36.6482	584.705	CCT2;DKC1;TCP1;CCT8;CCT7;CCT5;CCT4
regulation of protein localization to Cajal body (GO:1904869)	7/11	1.1777e-07	3.12276e-06	36.6482	584.705	CCT2;DKC1;TCP1;CCT8;CCT7;CCT5;CCT4
positive regulation of protein localization to Cajal body (GO:1904871)	7/11	1.1777e-07	3.12276e-06	36.6482	584.705	CCT2;DKC1;TCP1;CCT8;CCT7;CCT5;CCT4
positive regulation of translation (GO:0045727)	19/100	1.22051e-07	3.20257e-06	4.95776	78.9217	TRUB2;CDC123;DDX3X;MRPS27;TRMT10C;UQCC2;NAT10;EEF2;MTOR;RPS4X;RPUSD4;NGRN;METTL14;PKM;EIF6;C1QBP;POLR2D;POLR2G;RPL26
protein-DNA complex assembly (GO:0065004)	23/143	1.49081e-07	3.87149e-06	4.06076	63.8302	MCM7;CCNH;SMARCA5;GTF2H4;GTF2H5;ORC5;PSMA5;ORC4;PSMA6;CHAF1B;PSMC5;ORC6;PSMA4;PSMD2;GRWD1;ORC3;PSMC1;PSMC2;MCM3;MCM4;MCM5;UBA52;MCM2
histone H4 acetylation (GO:0043967)	13/48	1.5951e-07	4.10007e-06	7.81724	122.349	KMT2A;MEAF6;TRRAP;MCRS1;ACTL6A;YEATS4;RUVBL2;TADA3;EP400;WDR5;BRD8;DMAP1;OGT
histone H2A acetylation (GO:0043968)	8/16	1.77055e-07	4.50506e-06	20.9604	325.868	MEAF6;TRRAP;RUVBL2;ACTL6A;EP400;YEATS4;BRD8;DMAP1
mitochondrial RNA 3'-end processing (GO:0000965)	5/5	2.01601e-07	5.07833e-06	95410	1.47093e+06	SUPV3L1;PNPT1;TRMT10C;TRNT1;HSD17B10
inner mitochondrial membrane organization (GO:0007007)	13/49	2.08048e-07	5.18884e-06	7.59969	116.925	HSPA9;NDUFA13;MTX2;TIMM9;TIMM13;DNAJC11;TIMM22;TIMM10;LETM1;TIMM10B;SAMM50;OPA1;ROMO1
tRNA aminoacylation for mitochondrial protein translation (GO:0070127)	6/8	2.37998e-07	5.82056e-06	62.7632	957.201	AARS2;SARS2;DARS2;TARS2;YARS2;WARS2
pre-replicative complex assembly involved in nuclear cell cycle DNA replication (GO:0006267)	6/8	2.37998e-07	5.82056e-06	62.7632	957.201	MCM7;ORC3;MCM3;MCM4;MCM5;MCM2
histone mRNA metabolic process (GO:0008334)	10/28	2.43783e-07	5.90469e-06	11.6642	177.611	LSM10;EXOSC10;EXOSC4;LSM11;SSB;NCBP1;SNRPG;SNRPD3;SNRPF;MTPAP
metallo-sulfur cluster assembly (GO:0031163)	9/22	2.51971e-07	5.98789e-06	14.5232	220.665	HSPA9;ISCA1;NFS1;LYRM4;GLRX5;IBA57;MMS19;HSCB;CIAO1
positive regulation of DNA-templated transcription, initiation (GO:2000144)	9/22	2.51971e-07	5.98789e-06	14.5232	220.665	FOSL1;MED12;MED1;MED14;MED13;MED24;SUB1;HNF1B;MED4
protein insertion into mitochondrial inner membrane (GO:0045039)	7/12	2.71409e-07	6.38954e-06	29.317	443.263	TIMM10B;NDUFA13;TIMM9;TIMM13;ROMO1;TIMM22;TIMM10
positive regulation of protein localization to nucleus (GO:1900182)	15/68	3.41977e-07	7.9763e-06	5.96408	88.7964	CCT2;TFRC;MCRS1;PLK1;NMD3;TRIM28;DKC1;TCP1;CCT8;DMAP1;CCT7;ECT2;CCT5;CCT4;ZPR1
DNA-templated transcription, termination (GO:0006353)	15/70	5.10393e-07	1.17952e-05	5.7466	83.2573	PRMT5;TBP;NCBP1;CCNH;TTF2;GTF2H4;GTF2H5;LSM10;NUDT21;LSM11;TAF1C;SNRPG;SNRPD3;SNRPF;POLR2K
DNA strand elongation (GO:0022616)	8/18	5.54464e-07	1.24705e-05	16.7666	241.527	GINS1;GINS2;RAD50;MCM7;GINS3;GINS4;MCM3;MCM4
DNA strand elongation involved in DNA replication (GO:0006271)	8/18	5.54464e-07	1.24705e-05	16.7666	241.527	GINS1;GINS2;MCM7;GINS3;GINS4;MCM3;MCM4;LIG3
rRNA catabolic process (GO:0016075)	8/18	5.54464e-07	1.24705e-05	16.7666	241.527	EXOSC7;EXOSC10;EXOSC4;DIS3;EXOSC9;DIS3L;EXOSC8;EXOSC2
ribosomal subunit export from nucleus (GO:0000054)	7/13	5.64687e-07	1.24776e-05	24.4296	351.468	RPS15;LSG1;EIF6;NMD3;SDAD1;ABCE1;NOP9
spliceosomal tri-snRNP complex assembly (GO:0000244)	7/13	5.64687e-07	1.24776e-05	24.4296	351.468	PRPF3;DDX20;CD2BP2;PRPF19;PRPF8;SRSF10;LSM2
iron-sulfur cluster assembly (GO:0016226)	9/24	6.09516e-07	1.3351e-05	12.5855	180.106	HSPA9;ISCA1;NFS1;LYRM4;GLRX5;IBA57;MMS19;HSCB;CIAO1
regulation of translation (GO:0006417)	25/178	6.28093e-07	1.36394e-05	3.46358	49.4619	DDX3X;NAT10;MTIF2;MALSU1;TYMS;MRPL13;RPS4X;EIF4ENIF1;METTL14;MTG1;MTG2;RPS3;EIF4E;TSFM;EIF2B2;NCBP1;DAPK3;EEF2;MTOR;DHFR;EIF6;ETF1;RPL26;GAPDH;METAP1
histone exchange (GO:0043486)	11/38	6.90238e-07	1.48608e-05	8.55915	121.422	CENPW;MIS18A;MIS18BP1;ACTR6;SMARCA5;CENPM;OIP5;DMAP1;CENPO;CENPP;CENPQ
transcription-coupled nucleotide-excision repair (GO:0006283)	15/73	9.04544e-07	1.93097e-05	5.4485	75.8205	CCNH;RFC2;LIG3;PRPF19;GTF2H4;GTF2H5;COPS6;COPS5;POLR2B;POLD1;POLR2C;POLR2D;POLR2G;UBA52;POLR2K
mitochondrial electron transport, NADH to ubiquinone (GO:0006120)	11/39	9.21722e-07	1.95111e-05	8.25303	114.693	NDUFB9;NDUFA8;NDUFA13;NDUFA6;NDUFS8;NDUFA11;NDUFS7;NDUFB5;NDUFA1;NDUFC2;NDUFS1
7-methylguanosine mRNA capping (GO:0006370)	10/32	1.01356e-06	2.11004e-05	9.54145	131.692	NCBP1;CCNH;POLR2B;POLR2C;POLR2D;POLR2G;CMTR1;GTF2H4;POLR2K;GTF2H5
7-methylguanosine RNA capping (GO:0009452)	10/32	1.01356e-06	2.11004e-05	9.54145	131.692	NCBP1;CCNH;POLR2B;POLR2C;POLR2D;POLR2G;CMTR1;GTF2H4;POLR2K;GTF2H5
positive regulation of mitochondrial translation (GO:0070131)	7/14	1.08452e-06	2.23928e-05	20.9385	287.577	RPUSD4;TRUB2;NGRN;MRPS27;TRMT10C;UQCC2;C1QBP
tRNA surveillance (GO:0106354)	5/6	1.16361e-06	2.32629e-05	104.496	1427.83	EXOSC7;EXOSC10;EXOSC9;EXOSC8;EXOSC2
nuclear polyadenylation-dependent ncRNA catabolic process (GO:0071046)	5/6	1.16361e-06	2.32629e-05	104.496	1427.83	EXOSC7;EXOSC10;EXOSC9;EXOSC8;EXOSC2
nuclear polyadenylation-dependent rRNA catabolic process (GO:0071035)	5/6	1.16361e-06	2.32629e-05	104.496	1427.83	EXOSC7;EXOSC10;EXOSC9;EXOSC8;EXOSC2
nuclear polyadenylation-dependent tRNA catabolic process (GO:0071038)	5/6	1.16361e-06	2.32629e-05	104.496	1427.83	EXOSC7;EXOSC10;EXOSC9;EXOSC8;EXOSC2
nucleocytoplasmic transport (GO:0006913)	11/40	1.21888e-06	2.41761e-05	7.96803	108.505	LSG1;SNRPD2;NCBP1;SNRPD1;GEMIN2;DDX20;SNRPG;NUTF2;SNRPD3;SNRPF;GEMIN8
RNA catabolic process (GO:0006401)	12/49	1.55936e-06	3.06876e-05	6.81761	91.1599	SUPV3L1;EXOSC7;FEN1;RNASEH1;PNPT1;LSM6;NCBP1;SKIV2L;METTL16;LSM5;LSM2;ZPR1
positive regulation of TOR signaling (GO:0032008)	11/41	1.5971e-06	3.11867e-05	7.70202	102.801	RPTOR;RRAGA;SEH1L;MIOS;RRAGC;LAMTOR2;LAMTOR1;LAMTOR4;WDR24;LAMTOR3;TELO2
mitotic DNA replication (GO:1902969)	6/10	1.64845e-06	3.1458e-05	31.3783	417.823	GINS1;CDC45;GINS3;MCM3;MCM4;MCM2
nuclear-transcribed mRNA catabolic process, exonucleolytic, 3'-5' (GO:0034427)	6/10	1.64845e-06	3.1458e-05	31.3783	417.823	EXOSC7;EXOSC4;EXOSC9;EXOSC8;SKIV2L;EXOSC2
positive regulation of rRNA processing (GO:2000234)	6/10	1.64845e-06	3.1458e-05	31.3783	417.823	UTP15;TRMT112;DIMT1;HEATR1;RIOK1;WDR43
regulation of mRNA catabolic process (GO:0061013)	19/122	2.91505e-06	5.52106e-05	3.89431	49.6354	NUP214;SET;PNPT1;DIS3;PSMA5;EXOSC7;PSMA6;PSMC5;PSMA4;EXOSC4;PSMD2;EXOSC9;PSMC1;EXOSC8;PSMC2;PABPC1;UBA52;EXOSC2;EXOSC1
regulation of rRNA processing (GO:2000232)	7/16	3.33391e-06	6.26726e-05	16.2838	205.361	UTP15;USP36;TRMT112;DIMT1;HEATR1;RIOK1;WDR43
mRNA modification (GO:0016556)	8/22	3.43825e-06	6.40837e-05	11.9736	150.635	TRUB2;METTL14;TRMT10C;DKC1;TRMT6;METTL16;CMTR1;TRMT61A
mitochondrial transcription (GO:0006390)	6/11	3.4853e-06	6.40837e-05	25.1013	315.447	TFAM;TFB2M;MRPL12;POLRMT;TFB1M;TEFM
nuclear DNA replication (GO:0033260)	6/11	3.4853e-06	6.40837e-05	25.1013	315.447	MCM7;ORC3;MCM3;MCM4;MCM5;MCM2
positive regulation of RNA metabolic process (GO:0051254)	11/45	4.33605e-06	7.91487e-05	6.79447	83.9019	UTP15;SUPV3L1;TRMT112;PNPT1;U2AF2;DIMT1;HEATR1;NMD3;RIOK1;WDR43;ZPR1
CENP-A containing chromatin organization (GO:0061641)	9/30	5.20025e-06	9.35674e-05	8.9868	109.341	CENPW;MIS18A;MIS18BP1;SMARCA5;CENPM;OIP5;CENPO;CENPP;CENPQ
CENP-A containing nucleosome assembly (GO:0034080)	9/30	5.20025e-06	9.35674e-05	8.9868	109.341	CENPW;MIS18A;MIS18BP1;SMARCA5;CENPM;OIP5;CENPO;CENPP;CENPQ
mitochondrial electron transport, cytochrome c to oxygen (GO:0006123)	7/17	5.44301e-06	9.69304e-05	14.6547	177.632	COX7B;CYCS;COX5B;COX6C;COX7C;COX10;COX6B1
spliceosomal complex assembly (GO:0000245)	11/46	5.46412e-06	9.69304e-05	6.6	79.9742	SF3A1;SNRPD2;NCBP1;SNRPD1;SRSF1;SNRPG;PRPF19;USP39;SF3B1;SRSF10;CRNKL1
nucleotide-excision repair (GO:0006289)	17/105	5.606e-06	9.87519e-05	4.07247	49.243	SLC30A9;CCNH;RFC2;LIG3;PRPF19;GTF2H4;GTF2H5;COPS6;COPS5;POLR2B;POLD1;POLR2C;POLR2D;MMS19;POLR2G;UBA52;POLR2K
nuclear export (GO:0051168)	15/84	5.75007e-06	0.000100586	4.57725	55.2305	NUP214;NCBP1;RBM8A;ALYREF;SRSF1;NUTF2;THOC3;SRRM1;LSG1;U2AF2;MAGOH;SRSF2;SRSF3;SRSF7;EIF4E
mitochondrial transport (GO:0006839)	12/56	7.01807e-06	0.000121921	5.73089	68.0085	TIMM10B;TOMM40;MTX2;COX18;TIMM9;TIMM13;TOMM7;TIMM22;TIMM10;BAK1;TOMM20;TOMM22
RNA transport (GO:0050658)	14/76	8.0535e-06	0.00013895	4.75093	55.7256	NUP214;PNPT1;NCBP1;RBM8A;ALYREF;SRSF1;THOC3;SRRM1;U2AF2;MAGOH;SRSF2;SRSF3;SRSF7;EIF4E
DNA-templated transcription, initiation (GO:0006352)	22/168	9.2789e-06	0.000159004	3.18456	36.902	MED1;TBP;TAF12;CCNH;SMARCA5;TFB2M;POLRMT;TFB1M;MED27;GTF2H4;GTF2H5;MED7;CDK9;MED23;SNW1;POLR2B;TAF1C;POLR2C;POLR2D;TFAM;POLR2G;POLR2K
chromatin remodeling at centromere (GO:0031055)	9/32	9.38483e-06	0.000159464	8.20448	94.9784	CENPW;MIS18A;MIS18BP1;SMARCA5;CENPM;OIP5;CENPO;CENPP;CENPQ
import into nucleus (GO:0051170)	14/77	9.4324e-06	0.000159464	4.67527	54.0992	NUP214;GEMIN2;STAT3;DDX20;NUTF2;IPO7;PHB2;EIF4ENIF1;SNRPD2;SNRPD1;SNRPG;SNRPD3;SNRPF;GEMIN8
U4 snRNA 3'-end processing (GO:0034475)	5/8	1.00511e-05	0.000166571	34.8284	400.799	EXOSC7;EXOSC4;EXOSC9;EXOSC8;EXOSC2
mitochondrial RNA processing (GO:0000963)	5/8	1.00511e-05	0.000166571	34.8284	400.799	SUPV3L1;PNPT1;TRMT10C;ELAC2;FASTKD5
mitochondrial tRNA processing (GO:0090646)	5/8	1.00511e-05	0.000166571	34.8284	400.799	TRMT10C;ELAC2;TRNT1;HSD17B10;TRIT1
mitochondrial respiratory chain complex I assembly (GO:0032981)	12/58	1.03002e-05	0.000168482	5.48114	62.9418	NDUFB9;NDUFA8;NDUFA13;NDUFS8;NDUFA6;NDUFA11;NDUFS7;NDUFB5;NDUFAF7;NDUFA1;NDUFC2;NDUFS1
NADH dehydrogenase complex assembly (GO:0010257)	12/58	1.03002e-05	0.000168482	5.48114	62.9418	NDUFB9;NDUFA8;NDUFA13;NDUFS8;NDUFA6;NDUFA11;NDUFS7;NDUFB5;NDUFAF7;NDUFA1;NDUFC2;NDUFS1
endonucleolytic cleavage of tricistronic rRNA transcript (SSU-rRNA, 5.8S rRNA, LSU-rRNA) (GO:0000479)	6/13	1.19575e-05	0.000194328	17.9276	203.195	ABT1;RCL1;TBL3;BMS1;UTP20;NOP9
negative regulation of RNA splicing (GO:0033119)	7/19	1.30076e-05	0.000208701	12.2109	137.373	RPS26;PTBP1;U2AF2;C1QBP;SRSF10;SRSF7;RPS13
positive regulation of establishment of protein localization (GO:1904951)	7/19	1.30076e-05	0.000208701	12.2109	137.373	CCT2;DKC1;TCP1;CCT8;CCT7;CCT5;CCT4
regulation of mRNA splicing, via spliceosome (GO:0048024)	15/90	1.37551e-05	0.000219297	4.20975	47.1243	SF3B4;NCBP1;RBM8A;HNRNPU;SMU1;PTBP1;SNW1;U2AF2;C1QBP;CWC22;MAGOH;SRSF3;METTL16;SRSF7;SRSF10
positive regulation of viral transcription (GO:0050434)	8/26	1.42592e-05	0.000225905	9.31087	103.892	CDK9;POLR2B;POLR2C;POLR2D;NELFB;POLR2G;NELFCD;POLR2K
cellular respiration (GO:0045333)	10/42	1.52238e-05	0.00023968	6.55631	72.7268	NDUFS8;UQCRB;NDUFS7;UQCRC1;UQCRFS1;CYCS;NDUFS1;UQCR10;UQCRC2;COX10
snRNA transcription by RNA polymerase II (GO:0042795)	13/70	1.53946e-05	0.000240863	4.79451	53.1304	TBP;ELL;NCBP1;INTS2;SNAPC5;CDK9;SNAPC1;POLR2B;POLR2C;POLR2D;POLR2G;RPRD1B;POLR2K
snRNA transcription (GO:0009301)	13/71	1.80625e-05	0.000280861	4.7116	51.4586	TBP;ELL;NCBP1;INTS2;SNAPC5;CDK9;SNAPC1;POLR2B;POLR2C;POLR2D;POLR2G;RPRD1B;POLR2K
regulation of transcription elongation from RNA polymerase II promoter (GO:0034243)	8/27	1.94508e-05	0.000300593	8.82036	95.6799	ELL;EAF1;HNRNPU;NELFB;NELFCD;EAPP;WDR43;BRD4
endonucleolytic cleavage in 5'-ETS of tricistronic rRNA transcript (SSU-rRNA, 5.8S rRNA, LSU-rRNA) (GO:0000480)	4/5	2.12474e-05	0.0003167	83.5055	898.458	ABT1;TBL3;UTP20;NOP9
endonucleolytic cleavage to generate mature 5'-end of SSU-rRNA from (SSU-rRNA, 5.8S rRNA, LSU-rRNA) (GO:0000472)	4/5	2.12474e-05	0.0003167	83.5055	898.458	ABT1;TBL3;UTP20;NOP9
RNA localization to Cajal body (GO:0090670)	4/5	2.12474e-05	0.0003167	83.5055	898.458	CCT2;DKC1;TCP1;CCT4
rRNA 5'-end processing (GO:0000967)	4/5	2.12474e-05	0.0003167	83.5055	898.458	ABT1;TBL3;UTP20;NOP9
scaRNA localization to Cajal body (GO:0090666)	4/5	2.12474e-05	0.0003167	83.5055	898.458	CCT2;DKC1;TCP1;CCT4
tRNA thio-modification (GO:0034227)	4/5	2.12474e-05	0.0003167	83.5055	898.458	CTU2;CTU1;MOCS3;URM1
exonucleolytic trimming involved in rRNA processing (GO:0000459)	5/9	2.17575e-05	0.000316804	26.1199	280.412	EXOSC7;EXOSC10;EXOSC9;EXOSC8;EXOSC2
exonucleolytic trimming to generate mature 3'-end of 5.8S rRNA from tricistronic rRNA transcript (SSU-rRNA, 5.8S rRNA, LSU-rRNA) (GO:0000467)	5/9	2.17575e-05	0.000316804	26.1199	280.412	EXOSC7;EXOSC10;EXOSC9;EXOSC8;EXOSC2
mitochondrial tRNA modification (GO:0070900)	5/9	2.17575e-05	0.000316804	26.1199	280.412	RPUSD4;TRMT10C;HSD17B10;MTO1;TRIT1
nuclear RNA surveillance (GO:0071027)	5/9	2.17575e-05	0.000316804	26.1199	280.412	EXOSC7;EXOSC10;EXOSC4;EXOSC9;EXOSC8
cellular response to acid chemical (GO:0071229)	8/28	2.61403e-05	0.000378433	8.3789	88.4144	RPTOR;RRAGA;RRAGC;LAMTOR2;LAMTOR1;LAMTOR4;LAMTOR3;MTOR
cellular response to amino acid starvation (GO:0034198)	13/74	2.86487e-05	0.000412377	4.47918	46.854	ATP6V1G1;SEH1L;MIOS;WDR24;MTOR;RPTOR;RRAGA;RRAGC;LAMTOR2;LAMTOR1;ATP6V1E1;LAMTOR4;LAMTOR3
G1/S transition of mitotic cell cycle (GO:0000082)	14/85	3.03485e-05	0.000434363	4.14673	43.1375	CCNH;MAX;CUL2;CDC7;TYMS;HINFP;DHFR;DBF4;TFDP1;CDC45;CCND1;MYC;EIF4E;BRD4
mRNA methylation (GO:0080009)	6/15	3.22187e-05	0.000458524	13.9423	144.204	METTL14;TRMT10C;TRMT6;METTL16;CMTR1;TRMT61A
response to amino acid starvation (GO:1990928)	13/75	3.32181e-05	0.000470092	4.4067	45.4437	ATP6V1G1;SEH1L;MIOS;WDR24;MTOR;RPTOR;RRAGA;RRAGC;LAMTOR2;LAMTOR1;ATP6V1E1;LAMTOR4;LAMTOR3
centromere complex assembly (GO:0034508)	9/37	3.38527e-05	0.000476397	6.73762	69.3537	CENPW;MIS18A;MIS18BP1;SMARCA5;CENPM;OIP5;CENPO;CENPP;CENPQ
mitotic spindle organization (GO:0007052)	20/157	3.49662e-05	0.000489333	3.07984	31.6026	DCTN6;STIL;SEH1L;PLK1;BCCIP;KIF11;SMC3;SMC1A;SKA2;AURKA;TPX2;RPS27;BIRC5;CENPM;BUB3;CENPO;MAPRE1;CENPP;CENPQ;PAFAH1B1
rRNA 3'-end processing (GO:0031125)	5/10	4.18667e-05	0.000576296	20.8949	210.641	EXOSC7;EXOSC10;EXOSC9;EXOSC8;EXOSC2
rRNA pseudouridine synthesis (GO:0031118)	5/10	4.18667e-05	0.000576296	20.8949	210.641	RPUSD4;DKC1;NHP2;NAF1;NOP10
nuclear mRNA surveillance (GO:0071028)	5/10	4.18667e-05	0.000576296	20.8949	210.641	EXOSC7;EXOSC10;EXOSC4;EXOSC9;EXOSC8
snRNA 3'-end processing (GO:0034472)	8/30	4.53634e-05	0.000617677	7.61638	76.17	EXOSC7;TOE1;EXOSC4;EXOSC9;EXOSC8;INTS2;USB1;EXOSC2
ncRNA catabolic process (GO:0034661)	8/30	4.53634e-05	0.000617677	7.61638	76.17	EXOSC7;EXOSC10;EXOSC4;DIS3;EXOSC9;DIS3L;EXOSC8;EXOSC2
DNA replication-independent nucleosome assembly (GO:0006336)	9/39	5.30985e-05	0.000719114	6.28779	61.893	CENPW;MIS18A;MIS18BP1;SMARCA5;CENPM;OIP5;CENPO;CENPP;CENPQ
regulation of G2/M transition of mitotic cell cycle (GO:0010389)	19/149	5.3662e-05	0.000722859	3.0811	30.2958	PLK1;HAUS3;CDC7;HAUS2;AURKA;PSMA5;TPX2;PSMA6;PSMC5;TUBA1A;PSMA4;CCND1;HAUS8;PSMD2;PSMC1;PSMC2;MAPRE1;PAFAH1B1;BRD4
snRNA modification (GO:0040031)	4/6	6.14156e-05	0.000805759	41.7505	404.89	DKC1;NHP2;METTL16;NOP10
mitotic DNA replication initiation (GO:1902975)	4/6	6.14156e-05	0.000805759	41.7505	404.89	GINS3;MCM3;MCM4;MCM2
nuclear cell cycle DNA replication initiation (GO:1902315)	4/6	6.14156e-05	0.000805759	41.7505	404.89	GINS3;MCM3;MCM4;MCM2
peptidyl-diphthamide biosynthetic process from peptidyl-histidine (GO:0017183)	4/6	6.14156e-05	0.000805759	41.7505	404.89	DPH2;DPH3;DPH5;DPH6
peptidyl-diphthamide metabolic process (GO:0017182)	4/6	6.14156e-05	0.000805759	41.7505	404.89	DPH2;DPH3;DPH5;DPH6
protein transmembrane import into intracellular organelle (GO:0044743)	8/32	7.51341e-05	0.000975581	6.98095	66.2928	CHCHD4;TOMM40;AIFM1;GRPEL1;ROMO1;TOMM20;HSPD1;TIMM50
response to amino acid (GO:0043200)	8/32	7.51341e-05	0.000975581	6.98095	66.2928	RPTOR;RRAGA;RRAGC;LAMTOR2;LAMTOR1;LAMTOR4;LAMTOR3;MTOR
microtubule cytoskeleton organization involved in mitosis (GO:1902850)	17/128	7.83084e-05	0.00101158	3.22472	30.4892	DCTN6;STIL;SEH1L;PLK1;BCCIP;KIF11;SKA2;AURKA;RPS27;BIRC5;CENPM;BUB3;CENPO;MAPRE1;CENPP;CENPQ;PAFAH1B1
positive regulation of DNA biosynthetic process (GO:2000573)	11/61	9.12871e-05	0.00117323	4.61636	42.9391	CCT2;POLG2;RFC2;DKC1;MYC;TCP1;NAF1;CCT8;CCT7;CCT5;CCT4
histone H3 acetylation (GO:0043966)	9/42	9.87313e-05	0.00126246	5.71527	52.7126	DR1;BRPF1;TADA2A;MEAF6;TAF12;YEATS2;KAT6A;TADA3;WDR5
tRNA metabolic process (GO:0006399)	6/18	0.000106135	0.00135028	10.455	95.672	POP5;SSB;DARS2;YARS2;FARS2;THG1L
regulation of telomere maintenance via telomerase (GO:0032210)	10/52	0.000107966	0.00136666	4.99266	45.6014	CCT2;EXOSC10;TCP1;HNRNPU;NAT10;NAF1;CCT8;CCT7;CCT5;CCT4
mRNA export from nucleus (GO:0006406)	15/107	0.000109657	0.00138113	3.42879	31.2642	NUP214;SEH1L;RBM8A;NCBP1;ALYREF;SRSF1;THOC3;SRRM1;U2AF2;MAGOH;POLR2D;SRSF2;SRSF3;SRSF7;EIF4E
anaphase-promoting complex-dependent catabolic process (GO:0031145)	13/84	0.000112207	0.00140622	3.84628	34.9826	PLK1;AURKA;PSMA5;PSMA6;PSMC5;PSMA4;PTTG1;PSMD2;PSMC1;PSMC2;BUB3;SKP2;UBA52
cellular response to amino acid stimulus (GO:0071230)	8/34	0.000119541	0.00148337	6.44328	58.1947	RPTOR;RRAGA;RRAGC;LAMTOR2;LAMTOR1;LAMTOR4;LAMTOR3;MTOR
termination of RNA polymerase II transcription (GO:0006369)	8/34	0.000119541	0.00148337	6.44328	58.1947	LSM10;NUDT21;LSM11;NCBP1;SNRPG;TTF2;SNRPD3;SNRPF
double-strand break repair via homologous recombination (GO:0000724)	14/97	0.000134173	0.00165678	3.54497	31.6083	GINS2;FEN1;MCM7;GINS4;LIG3;CDC7;SMC6;NIPBL;RAD50;CDC45;MCM3;MCM4;MCM5;MCM2
cellular protein complex disassembly (GO:0043624)	4/7	0.00013808	0.00168846	27.8322	247.364	N6AMT1;TRMT112;ETF1;ABCE1
cytochrome complex assembly (GO:0017004)	4/7	0.00013808	0.00168846	27.8322	247.364	COX18;HCCS;COA6;COX10
intracellular protein transmembrane transport (GO:0065002)	9/44	0.00014457	0.00175082	5.38812	47.6404	CHCHD4;SEC61A1;TOMM40;AIFM1;GRPEL1;ROMO1;TOMM20;HSPD1;TIMM50
mRNA catabolic process (GO:0006402)	9/44	0.00014457	0.00175082	5.38812	47.6404	SUPV3L1;EXOSC10;EXOSC4;PNPT1;LSM6;EXOSC9;METTL16;LSM5;LSM2
mRNA-containing ribonucleoprotein complex export from nucleus (GO:0071427)	14/99	0.000167495	0.00201875	3.46119	30.0935	NUP214;SEH1L;RBM8A;NCBP1;ALYREF;SRSF1;THOC3;SRRM1;U2AF2;MAGOH;SRSF2;SRSF3;SRSF7;EIF4E
protein stabilization (GO:0050821)	20/179	0.000219115	0.00262833	2.65061	22.3338	USP36;CCT2;RPS7;CCNH;RPL23;RPL11;PHB;PHB2;GTPBP4;HSPD1;TCP1;PIN1;CCT8;VHL;NAA15;CCT7;GAPDH;TELO2;CCT5;CCT4
negative regulation of translation (GO:0017148)	13/90	0.000228728	0.00273065	3.54545	29.7215	FTO;DDX3X;ROCK2;DAPK3;MALSU1;TYMS;MRPL13;DHFR;EIF4ENIF1;METTL14;RPS3;METTL16;GAPDH
transcription initiation from RNA polymerase II promoter (GO:0006367)	17/140	0.000237363	0.00282037	2.90827	24.2722	MED1;DR1;TBP;TAF12;CCNH;MED27;GTF2H4;GTF2H5;MED7;CDK9;MED23;SNW1;POLR2B;POLR2C;POLR2D;POLR2G;POLR2K
regulation of cytoplasmic translational elongation (GO:1900247)	4/8	0.00026611	0.00311782	20.8731	171.819	DPH2;DPH3;DPH5;DPH6
rRNA base methylation (GO:0070475)	4/8	0.00026611	0.00311782	20.8731	171.819	TRMT112;EMG1;NOP2;METTL16
tubulin complex assembly (GO:0007021)	4/8	0.00026611	0.00311782	20.8731	171.819	VBP1;TCP1;TBCD;TBCA
glycolytic process (GO:0006096)	7/29	0.000269446	0.00314229	6.65702	54.715	LDHA;PFKL;TPI1;PKM;PGAM1;GAPDH;HK2
negative regulation of G0 to G1 transition (GO:0070317)	8/38	0.000273628	0.00317636	5.583	45.8015	UXT;SUZ12;TFDP1;APAF1;MAX;EED;MGA;CDC7
aerobic respiration (GO:0009060)	6/21	0.000275628	0.0031849	8.36272	68.5447	NDUFS8;UQCRB;NDUFS7;UQCRC1;UQCR10;UQCRC2
mRNA transport (GO:0051028)	14/104	0.000283582	0.00324998	3.26804	26.6934	NUP214;SEH1L;RBM8A;NCBP1;ALYREF;SRSF1;THOC3;SRRM1;U2AF2;MAGOH;SRSF2;SRSF3;SRSF7;EIF4E
histone H3-K4 trimethylation (GO:0080182)	5/14	0.000285131	0.00324998	11.6058	94.7332	KMT2A;WDR82;SETD1B;WDR61;OGT
negative regulation of mRNA splicing, via spliceosome (GO:0048025)	5/14	0.000285131	0.00324998	11.6058	94.7332	PTBP1;U2AF2;C1QBP;SRSF10;SRSF7
histone H3-K4 methylation (GO:0051568)	7/30	0.000337645	0.00383121	6.36725	50.8967	KMT2A;RBBP5;WDR82;SETD1B;WDR5;WDR61;OGT
RNA export from nucleus (GO:0006405)	14/106	0.000346407	0.00391301	3.19666	25.4707	NUP214;SEH1L;RBM8A;NCBP1;ALYREF;SRSF1;THOC3;SRRM1;U2AF2;MAGOH;SRSF2;SRSF3;SRSF7;EIF4E
regulation of TOR signaling (GO:0032006)	11/71	0.000368273	0.00414143	3.84495	30.4008	RPTOR;RRAGA;SEH1L;MIOS;RRAGC;LAMTOR2;LAMTOR1;LAMTOR4;WDR24;LAMTOR3;TELO2
negative regulation of mRNA processing (GO:0050686)	5/15	0.000411588	0.00460796	10.4447	81.4214	PTBP1;U2AF2;C1QBP;SRSF10;SRSF7
phosphorylation of RNA polymerase II C-terminal domain (GO:0070816)	4/9	0.000461593	0.00514493	16.6976	128.251	CDK9;CCNH;GTF2H4;GTF2H5
DNA duplex unwinding (GO:0032508)	9/51	0.000465412	0.00516463	4.48845	34.438	SUPV3L1;RAD50;MCM7;MCM4;SSBP1;UBA52;GTF2H4;GTF2H5;MCM2
regulation of G0 to G1 transition (GO:0070316)	8/41	0.000473321	0.00520653	5.07466	38.8503	UXT;SUZ12;TFDP1;APAF1;MAX;EED;MGA;CDC7
regulation of viral transcription (GO:0046782)	8/41	0.000473321	0.00520653	5.07466	38.8503	CDK9;POLR2B;POLR2C;POLR2D;NELFB;POLR2G;NELFCD;POLR2K
regulation of transcription involved in G1/S transition of mitotic cell cycle (GO:0000083)	7/32	0.00051529	0.00561911	5.85726	44.344	DHFR;CDC45;TFDP1;TYMS;BRD4;HINFP;ZPR1
mitochondrial membrane organization (GO:0007006)	7/32	0.00051529	0.00561911	5.85726	44.344	HSPA9;SAMM50;OPA1;MTX2;DNAJC11;BAK1;TIMM50
cell cycle G1/S phase transition (GO:0044843)	10/63	0.000553045	0.00597905	3.95416	29.6565	CCNA2;DBF4;CCND1;CCNH;MAX;MYC;CUL2;CDC7;EIF4E;HINFP
positive regulation of viral process (GO:0048524)	10/63	0.000553045	0.00597905	3.95416	29.6565	CDK9;DDX3X;POLR2B;POLR2C;POLR2D;NELFB;POLR2G;NELFCD;PABPC1;POLR2K
ATP-dependent chromatin remodeling (GO:0043044)	8/42	0.00056146	0.00601837	4.92515	36.8646	ACTR6;ACTL6A;MBD2;SMARCA5;CHD4;DMAP1;MTA2;ACTB
nucleic acid-templated transcription (GO:0097659)	8/42	0.00056146	0.00601837	4.92515	36.8646	RRAGC;POLR2B;POLR2C;POLR2D;MED20;POLR2G;MMS19;POLR2K
regulation of hematopoietic progenitor cell differentiation (GO:1901532)	11/75	0.000596428	0.00636611	3.60388	26.7572	PSMA5;PSMA6;METTL14;PSMC5;PSMA4;CBFB;KMT2A;PSMD2;PSMC1;PSMC2;PDCD2
canonical glycolysis (GO:0061621)	6/24	0.000607588	0.00640383	6.96784	51.6039	PFKL;TPI1;PKM;PGAM1;GAPDH;HK2
glucose catabolic process to pyruvate (GO:0061718)	6/24	0.000607588	0.00640383	6.96784	51.6039	PFKL;TPI1;PKM;PGAM1;GAPDH;HK2
ncRNA 3'-end processing (GO:0043628)	6/24	0.000607588	0.00640383	6.96784	51.6039	TOE1;PTCD1;SSB;ELAC2;INTS2;TRNT1
positive regulation of telomere maintenance via telomerase (GO:0032212)	7/33	0.000628387	0.00659545	5.63168	41.5187	CCT2;TCP1;NAF1;CCT8;CCT7;CCT5;CCT4
mitotic cell cycle phase transition (GO:0044772)	21/209	0.000652426	0.00681934	2.35284	17.2577	CCNH;MAX;PLK1;KDM8;CUL2;HAUS3;CDC7;HAUS2;HINFP;DNM2;AURKA;CCNA2;TUBA1A;DBF4;CCND1;HAUS8;MYC;SKP2;MAPRE1;EIF4E;PAFAH1B1
small nucleolar ribonucleoprotein complex assembly (GO:0000491)	4/10	0.000741413	0.00771743	13.9139	100.277	NUFIP1;RUVBL2;ZNHIT6;NAF1
histone lysine methylation (GO:0034968)	7/34	0.000760311	0.00788158	5.42282	38.9455	N6AMT1;TRMT112;KMT2A;RBBP5;WDR82;SETD1B;WDR5
glycolytic process through glucose-6-phosphate (GO:0061620)	6/25	0.000768688	0.00793576	6.60076	47.3329	PFKL;TPI1;PKM;PGAM1;GAPDH;HK2
positive regulation of mRNA catabolic process (GO:0061014)	8/44	0.000777479	0.00799375	4.65104	33.2989	FTO;EIF4ENIF1;METTL14;PNPT1;ROCK2;POLR2G;PABPC1;METTL16
pyruvate metabolic process (GO:0006090)	9/55	0.00082576	0.00845565	4.09729	29.0875	LDHA;PFKL;TPI1;PKM;SLC16A1;PGAM1;VDAC1;GAPDH;HK2
protein processing involved in protein targeting to mitochondrion (GO:0006627)	3/5	0.000899035	0.00891602	31.2787	219.395	MIPEP;PMPCB;PMPCA
regulation of histone H2B ubiquitination (GO:2001166)	3/5	0.000899035	0.00891602	31.2787	219.395	CDK9;RNF20;RNF40
regulation of system process (GO:0044057)	3/5	0.000899035	0.00891602	31.2787	219.395	MTG1;ROCK2;MTG2
ribosome localization (GO:0033750)	3/5	0.000899035	0.00891602	31.2787	219.395	LSG1;EIF6;ABCE1
RNA import into mitochondrion (GO:0035927)	3/5	0.000899035	0.00891602	31.2787	219.395	PNPT1;MRPL18;TOMM20
mature ribosome assembly (GO:0042256)	3/5	0.000899035	0.00891602	31.2787	219.395	DDX3X;EIF6;C1QBP
nuclear retention of pre-mRNA at the site of transcription (GO:0071033)	3/5	0.000899035	0.00891602	31.2787	219.395	EXOSC10;PRPF18;EXOSC2
positive regulation of histone ubiquitination (GO:0033184)	3/5	0.000899035	0.00891602	31.2787	219.395	CDK9;RNF20;RNF40
regulation of stem cell differentiation (GO:2000736)	12/91	0.000910685	0.0089857	3.18602	22.3063	PSMA5;PSMA6;NUDT21;PSMC5;PSMA4;CBFB;KMT2A;PSMD2;PSMC1;PSMC2;HNRNPU;NELFB
positive regulation of cell cycle G1/S phase transition (GO:1902808)	7/35	0.000913195	0.0089857	5.22887	36.5946	LSM10;RPTOR;DDX3X;LSM11;TFDP1;CCND1;PHB2
positive regulation of G1/S transition of mitotic cell cycle (GO:1900087)	6/26	0.000960868	0.009418	6.27039	43.5647	LSM10;RPTOR;DDX3X;LSM11;TFDP1;CCND1
regulation of mRNA polyadenylation (GO:1900363)	5/18	0.00104686	0.0101816	8.03311	55.1229	RNF20;CDK9;NUDT21;NCBP1;RNF40
regulation of transcription by RNA polymerase I (GO:0006356)	5/18	0.00104686	0.0101816	8.03311	55.1229	UTP15;DHX33;HEATR1;WDR43;POLR2K
positive regulation of telomere maintenance via telomere lengthening (GO:1904358)	7/36	0.00108929	0.0105536	5.0483	34.4406	CCT2;TCP1;NAF1;CCT8;CCT7;CCT5;CCT4
positive regulation of cysteine-type endopeptidase activity involved in apoptotic process (GO:0043280)	14/119	0.00111915	0.0108013	2.79897	19.0195	MTCH1;NDUFA13;DDX3X;APAF1;BCL10;HMGB1;HSPE1;HSPD1;CASP9;AIFM1;MYC;RPS3;CYCS;PDCD2
mitotic chromosome condensation (GO:0007076)	6/27	0.00118794	0.0114215	5.97149	40.2212	SET;PLK1;CSNK2B;NCAPG;SMC4;SMC2
positive regulation of mitotic cell cycle phase transition (GO:1901992)	9/58	0.0012234	0.0117176	3.84583	25.7906	LSM10;RPTOR;DDX3X;LSM11;TFDP1;CCND1;CDC7;PHB2;BRD4
regulation of gene expression, epigenetic (GO:0040029)	11/82	0.00127485	0.0121642	3.24737	21.6435	SUZ12;TBP;MYBBP1A;EED;TAF1C;SMARCA5;DDX21;CTCF;SF3B1;ACTB;POLR2K
histone H4-K16 acetylation (GO:0043984)	5/19	0.00136748	0.01295	7.45893	49.19	KMT2A;MEAF6;MCRS1;WDR5;OGT
protein import into mitochondrial matrix (GO:0030150)	5/19	0.00136748	0.01295	7.45893	49.19	TOMM40;GRPEL1;ROMO1;TOMM20;TIMM50
regulation of mitotic cell cycle (GO:0007346)	18/178	0.00143038	0.0134949	2.36525	15.4919	RNF20;PRMT5;DAPK3;PLK1;HNRNPU;CDK11B;RNF40;CDK9;PSMA5;PSMA6;PSMC5;PSMA4;PSMD2;PSMC1;PSMC2;PIN1;BUB3;EIF4E
regulation of DNA-templated transcription, elongation (GO:0032784)	6/28	0.0014539	0.0135643	5.69976	37.2394	TSFM;ELL;ALYREF;EAF1;HTATSF1;WDR43
internal peptidyl-lysine acetylation (GO:0018393)	6/28	0.0014539	0.0135643	5.69976	37.2394	NAA50;KAT5;TRRAP;RUVBL2;KAT6A;BRD8
transcription by RNA polymerase III (GO:0006383)	6/28	0.0014539	0.0135643	5.69976	37.2394	SNAPC5;GTF3C4;TBP;ELL;SNAPC1;POLR2K
sno(s)RNA 3'-end processing (GO:0031126)	4/12	0.00162341	0.0149794	10.4344	67.0222	EXOSC10;EXOSC4;DKC1;EXOSC2
negative regulation of transcription elongation from RNA polymerase II promoter (GO:0034244)	4/12	0.00162341	0.0149794	10.4344	67.0222	HNRNPU;NELFB;NELFCD;EAPP
peptidyl-methionine modification (GO:0018206)	4/12	0.00162341	0.0149794	10.4344	67.0222	NAA20;NAA25;NAA15;METAP1
activation of cysteine-type endopeptidase activity involved in apoptotic process by cytochrome c (GO:0008635)	3/6	0.00173666	0.0158502	20.8514	132.527	CASP9;APAF1;CYCS
mitochondrial ribosome assembly (GO:0061668)	3/6	0.00173666	0.0158502	20.8514	132.527	DDX28;DHX30;MRPS2
N-terminal peptidyl-methionine acetylation (GO:0017196)	3/6	0.00173666	0.0158502	20.8514	132.527	NAA20;NAA25;NAA15
cellular protein-containing complex assembly (GO:0034622)	17/168	0.00190056	0.0172834	2.36549	14.8212	CCT2;CENPW;VBP1;CLTC;TBCD;TBCA;PIK3C2A;HSPD1;CHCHD4;SAMM50;AIFM1;CSNK2B;TCP1;LONP1;PSMG3;AP2S1;PSMG2
termination of RNA polymerase I transcription (GO:0006363)	6/30	0.0021192	0.0192024	5.22423	32.1641	TBP;CCNH;TAF1C;GTF2H4;POLR2K;GTF2H5
regulation of transcription from RNA polymerase II promoter in response to hypoxia (GO:0061418)	10/75	0.00218797	0.0197545	3.22213	19.7348	PSMA5;PSMA6;PSMC5;PSMA4;PSMD2;PSMC1;CUL2;PSMC2;VHL;UBA52
mitochondrial calcium ion transmembrane transport (GO:0006851)	5/21	0.00221737	0.0199484	6.52588	39.8825	LETM1;PMPCB;PMPCA;PHB;PHB2
pseudouridine synthesis (GO:0001522)	4/13	0.00226027	0.020262	9.2745	56.5027	TRUB2;DKC1;NHP2;NOP10
apoptotic process (GO:0006915)	21/231	0.00229747	0.0204499	2.1039	12.7832	NCKAP1;APAF1;DAPK3;PAWR;MRPS30;CDK11B;HK2;MTOR;HSPD1;CASP9;BCL2L11;RRAGC;AIFM1;MYC;VDAC1;NDUFS1;NAE1;BAK1;OGT;GAPDH;MCM2
regulation of autophagy (GO:0010506)	21/231	0.00229747	0.0204499	2.1039	12.7832	USP36;ATP6V1G1;DAPK3;STAT3;HMGB1;PIK3C2A;WDR24;MTOR;RPTOR;RRAGA;KAT5;RRAGC;VDAC1;LAMTOR2;LAMTOR1;ATP6V1E1;LAMTOR4;DNM1L;LAMTOR3;GAPDH;EIF4E
protein methylation (GO:0006479)	7/41	0.00240436	0.0212239	4.30477	25.9598	N6AMT1;TRMT112;PRMT5;PRMT1;ETF1;FAM98B;SNRPD3
carbohydrate catabolic process (GO:0016052)	7/41	0.00240436	0.0212239	4.30477	25.9598	LDHA;PFKL;TPI1;PKM;PGAM1;GAPDH;HK2
regulation of RNA splicing (GO:0043484)	10/76	0.00241812	0.0212239	3.17314	19.1174	RPS26;PTBP1;U2AF2;HNRNPF;CWC22;SRSF3;METTL16;SRSF10;RPS13;ZPR1
positive regulation of growth (GO:0045927)	10/76	0.00241812	0.0212239	3.17314	19.1174	N6AMT1;RPTOR;SUPV3L1;DDX3X;DDX49;EXOSC4;NCBP1;EXOSC9;EXOSC2;ZPR1
regulation of mitotic cell cycle phase transition (GO:1901990)	18/188	0.00262369	0.0229482	2.22494	13.2232	PLK1;HAUS3;HAUS2;AURKA;PSMA5;TPX2;PSMA6;PSMC5;TUBA1A;PSMA4;HAUS8;PSMD2;PSMC1;PSMC2;BUB3;MAPRE1;UBA52;PAFAH1B1
regulation of DNA recombination at telomere (GO:0072695)	5/22	0.00276238	0.0238302	6.14168	36.1847	POLR2B;POLR2C;POLR2D;POLR2G;POLR2K
chaperone-mediated protein complex assembly (GO:0051131)	5/22	0.00276238	0.0238302	6.14168	36.1847	CCT2;LONP1;PSMG3;PSMG2;HSPD1
negative regulation of DNA recombination at telomere (GO:0048239)	5/22	0.00276238	0.0238302	6.14168	36.1847	POLR2B;POLR2C;POLR2D;POLR2G;POLR2K
positive regulation of translational initiation (GO:0045948)	5/22	0.00276238	0.0238302	6.14168	36.1847	CDC123;DDX3X;POLR2D;POLR2G;MTOR
cardiolipin biosynthetic process (GO:0032049)	3/7	0.0029356	0.0249824	15.6377	91.181	PGS1;TAMM41;CRLS1
rRNA-containing ribonucleoprotein complex export from nucleus (GO:0071428)	3/7	0.0029356	0.0249824	15.6377	91.181	LSG1;EIF6;ABCE1
mitochondrial DNA metabolic process (GO:0032042)	3/7	0.0029356	0.0249824	15.6377	91.181	TOP3A;LONP1;LIG3
polyadenylation-dependent snoRNA 3'-end processing (GO:0071051)	3/7	0.0029356	0.0249824	15.6377	91.181	EXOSC10;EXOSC4;EXOSC2
RNA biosynthetic process (GO:0032774)	6/32	0.00299155	0.0252876	4.82186	28.0245	PRIM2;PRMT5;TBP;TAF12;SMARCA5;TTF2
transcription initiation from RNA polymerase I promoter (GO:0006361)	6/32	0.00299155	0.0252876	4.82186	28.0245	TBP;CCNH;TAF1C;GTF2H4;POLR2K;GTF2H5
protein maturation by iron-sulfur cluster transfer (GO:0097428)	4/14	0.00305033	0.0256126	8.34661	48.3478	ISCA1;GLRX5;MMS19;CIAO1
negative regulation of DNA-templated transcription, elongation (GO:0032785)	4/14	0.00305033	0.0256126	8.34661	48.3478	HNRNPU;NELFB;NELFCD;EAPP
positive regulation of transcription by RNA polymerase I (GO:0045943)	5/23	0.00339805	0.0284375	5.80017	32.9714	UTP15;DHX33;HEATR1;MTOR;WDR43
apoptotic mitochondrial changes (GO:0008637)	6/33	0.00351669	0.029333	4.64303	26.2342	NDUFS1;BAK1;DNM1L;HK2;HSPD1;TIMM50
histone H4-K5 acetylation (GO:0043981)	4/15	0.00400988	0.0329019	7.58743	41.875	MEAF6;MCRS1;WDR5;OGT
histone H4-K8 acetylation (GO:0043982)	4/15	0.00400988	0.0329019	7.58743	41.875	MEAF6;MCRS1;WDR5;OGT
histone mRNA catabolic process (GO:0071044)	4/15	0.00400988	0.0329019	7.58743	41.875	SSB;EXOSC10;EXOSC4;MTPAP
tRNA 5'-end processing (GO:0099116)	4/15	0.00400988	0.0329019	7.58743	41.875	POP5;SSB;TRMT10C;HSD17B10
positive regulation of histone H3-K4 methylation (GO:0051571)	4/15	0.00400988	0.0329019	7.58743	41.875	SNW1;KMT2A;WDR5;WDR61
transcription by RNA polymerase I (GO:0006360)	6/34	0.00410735	0.0333755	4.47697	24.6009	TBP;CCNH;TAF1C;GTF2H4;POLR2K;GTF2H5
tRNA methylation (GO:0030488)	6/34	0.00410735	0.0333755	4.47697	24.6009	TRMT112;TRMT10C;HSD17B10;MTO1;TRMT61A;GTPBP3
positive regulation of telomerase activity (GO:0051973)	6/34	0.00410735	0.0333755	4.47697	24.6009	CCT2;DKC1;MYC;TCP1;NAF1;CCT4
chromosome condensation (GO:0030261)	7/45	0.00414146	0.0335445	3.85083	21.1284	SET;AIFM1;PLK1;CSNK2B;NCAPG;SMC4;SMC2
negative regulation of cell cycle G2/M phase transition (GO:1902750)	8/57	0.00429277	0.0345479	3.41476	18.6132	PSMA5;PSMA6;PSMC5;PSMA4;PSMD2;PSMC1;PSMC2;AURKA
positive regulation of gene expression, epigenetic (GO:0045815)	8/57	0.00429277	0.0345479	3.41476	18.6132	TBP;MYBBP1A;TAF1C;SMARCA5;DDX21;SF3B1;ACTB;POLR2K
box C/D snoRNP assembly (GO:0000492)	3/8	0.0045373	0.0353854	12.5095	67.4941	NUFIP1;RUVBL2;ZNHIT6
regulation of mitochondrial gene expression (GO:0062125)	3/8	0.0045373	0.0353854	12.5095	67.4941	TSFM;MTG1;MTG2
dynamin family protein polymerization involved in membrane fission (GO:0003373)	3/8	0.0045373	0.0353854	12.5095	67.4941	OPA1;DNM1L;DNM2
dynamin family protein polymerization involved in mitochondrial fission (GO:0003374)	3/8	0.0045373	0.0353854	12.5095	67.4941	OPA1;DNM1L;DNM2
endonucleolytic cleavage in ITS1 to separate SSU-rRNA from 5.8S rRNA and LSU-rRNA from tricistronic rRNA transcript (SSU-rRNA, 5.8S rRNA, LSU-rRNA) (GO:0000447)	3/8	0.0045373	0.0353854	12.5095	67.4941	ABT1;UTP20;NOP9
respiratory chain complex III assembly (GO:0017062)	3/8	0.0045373	0.0353854	12.5095	67.4941	UQCC2;UQCC1;UQCRFS1
snRNA transcription by RNA polymerase III (GO:0042796)	3/8	0.0045373	0.0353854	12.5095	67.4941	SNAPC5;ELL;SNAPC1
mitochondrial DNA replication (GO:0006264)	3/8	0.0045373	0.0353854	12.5095	67.4941	POLG2;SSBP1;TEFM
mitochondrial respiratory chain complex III assembly (GO:0034551)	3/8	0.0045373	0.0353854	12.5095	67.4941	UQCC2;UQCC1;UQCRFS1
negative regulation of mRNA polyadenylation (GO:1900364)	3/8	0.0045373	0.0353854	12.5095	67.4941	CDK9;RNF20;RNF40
spindle assembly (GO:0051225)	10/84	0.00504011	0.0390818	2.82891	14.9658	TPX2;HAUS8;BCCIP;RPS3;HAUS3;KIF11;SMC3;SMC1A;MAPRE1;HAUS2
regulation of hematopoietic stem cell differentiation (GO:1902036)	9/71	0.00504231	0.0390818	3.03737	16.0673	PSMA5;PSMA6;PSMC5;PSMA4;CBFB;KMT2A;PSMD2;PSMC1;PSMC2
DNA unwinding involved in DNA replication (GO:0006268)	4/16	0.00515446	0.0397067	6.95478	36.637	MCM7;MCM4;SSBP1;MCM2
N-terminal protein amino acid acetylation (GO:0006474)	4/16	0.00515446	0.0397067	6.95478	36.637	NAA50;NAA20;NAA25;NAA15
positive regulation of gene expression (GO:0010628)	35/482	0.00518885	0.0398498	1.65245	8.69396	DDX3X;TFRC;ROCK2;RPL11;NAT10;DDX21;CTCF;PHB;ACTB;RPS4X;METTL14;U2AF2;TAF1C;MYC;RPS3;SF3B1;POLR2K;MED1;TBP;RPS7;RPL23;STAT3;SMARCA5;EEF2;MAPK14;MTOR;HINFP;MED23;EIF6;MYBBP1A;TADA3;FAM98B;RPL26;GAPDH;ZPR1
regulation of macroautophagy (GO:0016241)	12/112	0.00532162	0.0407451	2.51417	13.1642	RPTOR;USP36;ATP6V1G1;RRAGA;RRAGC;LAMTOR2;LAMTOR1;ATP6V1E1;LAMTOR4;GAPDH;LAMTOR3;MTOR
regulation of mRNA processing (GO:0050684)	6/36	0.005504	0.0420139	4.17807	21.7355	NCBP1;CWC22;SRSF3;METTL16;SRSF10;CDK11B
positive regulation of histone methylation (GO:0031062)	5/26	0.00592866	0.0451187	4.97079	25.49	SNW1;KMT2A;WDR5;WDR61;OGT
negative regulation of cellular amide metabolic process (GO:0034249)	10/86	0.00595661	0.0451949	2.75417	14.1103	DHFR;EIF4ENIF1;DDX3X;DAPK3;RPS3;PIN1;MALSU1;TYMS;GAPDH;MRPL13
histone modification (GO:0016570)	12/114	0.00612551	0.0463368	2.46461	12.5579	NAA50;CCNA2;USP36;KAT5;SIN3B;TRRAP;PRMT1;RUVBL2;KAT6A;PHB;BRD8;MTA2
regulation of transcription from RNA polymerase II promoter in response to stress (GO:0043618)	10/87	0.00646102	0.0487284	2.71826	13.7054	PSMA5;PSMA6;PSMC5;PSMA4;PSMD2;PSMC1;CUL2;PSMC2;VHL;UBA52
negative regulation of mRNA 3'-end processing (GO:0031441)	3/9	0.00657517	0.0491479	10.424	52.3751	CDK9;RNF20;RNF40
negative regulation of ubiquitin protein ligase activity (GO:1904667)	3/9	0.00657517	0.0491479	10.424	52.3751	RPS7;RPL23;RPL11
phosphatidylglycerol biosynthetic process (GO:0006655)	3/9	0.00657517	0.0491479	10.424	52.3751	PGS1;TAMM41;CRLS1
regulation of primary metabolic process (GO:0080090)	13/130	0.00681513	0.0506411	2.32842	11.6156	MED1;FDPS;GGPS1;HMGCS1;ROCK2;PSMA5;PSMA6;PSMC5;PSMA4;SIN3B;PSMD2;PSMC1;PSMC2
G2/M transition of mitotic cell cycle (GO:0000086)	13/130	0.00681513	0.0506411	2.32842	11.6156	CCNH;PLK1;KDM8;HAUS3;HAUS2;DNM2;AURKA;CCNA2;TUBA1A;HAUS8;SKP2;MAPRE1;PAFAH1B1
mitotic sister chromatid segregation (GO:0000070)	11/102	0.0071034	0.0524735	2.531	12.5213	NAA50;NIPBL;SEH1L;SET;KIF18B;CSNK2B;PLK1;NCAPG;SMC1A;SMC4;SMC2
positive regulation of cellular protein metabolic process (GO:0032270)	11/102	0.0071034	0.0524735	2.531	12.5213	RPS4X;METTL14;DDX3X;EIF6;PLK1;NAT10;RPL26;BAK1;EEF2;OGT;MTOR
cell cycle G2/M phase transition (GO:0044839)	13/131	0.00725786	0.0534577	2.30857	11.3712	CCNH;PLK1;KDM8;HAUS3;HAUS2;DNM2;AURKA;CCNA2;TUBA1A;HAUS8;SKP2;MAPRE1;PAFAH1B1
regulation of generation of precursor metabolites and energy (GO:0043467)	7/50	0.00748222	0.0549496	3.40216	16.6544	NUP214;SEH1L;PNPT1;EIF6;NOA1;PGAM1;OGT
RNA destabilization (GO:0050779)	4/18	0.00805643	0.0588236	5.96061	28.7378	FTO;METTL14;ROCK2;METTL16
mitochondrial fission (GO:0000266)	4/18	0.00805643	0.0588236	5.96061	28.7378	OPA1;DNM1L;DNM2;SLC25A46
regulation of cellular amine metabolic process (GO:0033238)	7/51	0.00833761	0.0607007	3.32467	15.9151	PSMA5;PSMA6;PSMC5;PSMA4;PSMD2;PSMC1;PSMC2
positive regulation of transcription, DNA-templated (GO:0045893)	72/1183	0.00867664	0.0628932	1.37664	6.53508	DDX3X;ELL;KDM8;MED19;HNRNPU;CCNC;YEATS4;CTCF;HMGB1;TRIAP1;WDR43;MED12;RPTOR;MED14;MED13;TRIM28;KAT5;MED10;RUVBL2;MYC;MYBL2;PELP1;UTP15;ACTR2;MED1;SLC30A9;CHUK;HNF1B;MED4;DNM2;MED24;TFDP1;KAT6A;TFAM;UBA52;NUFIP1;KMT2A;MAX;HEATR1;NRF1;BCL10;PHB;MRPL12;LAGE3;DHX33;RPRD1B;VHL;BRD8;BRD4;RNF20;DR1;BRPF1;MCRS1;ALYREF;STAT3;SMARCA5;MTOR;HINFP;DRAP1;FOSL1;CDK9;PSMC5;SNW1;COPS5;TADA3;PIN1;MMS19;CEBPZ;NAA15…
negative regulation of cell cycle process (GO:0010948)	8/64	0.00868969	0.0628932	2.98681	14.1743	UXT;SUZ12;TFDP1;APAF1;EED;MAX;MGA;CDC7
protein modification by small protein removal (GO:0070646)	22/276	0.00871366	0.0628932	1.82006	8.63228	USP36;TRRAP;MCRS1;ACTL6A;TOMM20;ACTB;PSMA5;CCNA2;PSMA6;PSMC5;COPS6;PSMA4;COPS5;MYC;PSMD2;PSMC1;PSMC2;TADA3;USP30;SKP2;UBA52;OGT
regulation of RNA polymerase II transcription preinitiation complex assembly (GO:0045898)	3/10	0.00907536	0.0649455	8.93443	42.0114	PSMC5;PSMC2;HMGB1
RNA polymerase II preinitiation complex assembly (GO:0051123)	3/10	0.00907536	0.0649455	8.93443	42.0114	DR1;TBP;TAF12
positive regulation of transcription by RNA polymerase III (GO:0045945)	3/10	0.00907536	0.0649455	8.93443	42.0114	RPTOR;ELL;MTOR
regulation of cell cycle process (GO:0010564)	11/106	0.00940613	0.0671219	2.42392	11.311	PRMT5;DBF4;RACGAP1;DAPK3;PLK1;PIN1;RPRD1B;PRPF40A;KIF11;ECT2;AURKA
telomere maintenance via telomerase (GO:0007004)	5/29	0.00955691	0.0680052	4.34876	20.2239	RAD50;DKC1;NHP2;NOP10;TELO2
regulation of histone H3-K4 methylation (GO:0051569)	4/19	0.00984015	0.0696274	5.56295	25.708	SNW1;KMT2A;WDR5;WDR61
negative regulation of RNA metabolic process (GO:0051253)	4/19	0.00984015	0.0696274	5.56295	25.708	RPS26;PTBP1;NRDE2;RPS13
negative regulation of G2/M transition of mitotic cell cycle (GO:0010972)	8/66	0.0104117	0.0734652	2.88352	13.1627	PSMA5;PSMA6;PSMC5;PSMA4;PSMD2;PSMC1;PSMC2;AURKA
nucleobase-containing compound catabolic process (GO:0034655)	6/41	0.0104707	0.0736754	3.58026	16.323	EXOSC7;SUPV3L1;RNASEH1;PNPT1;NCBP1;SKIV2L
negative regulation of cellular protein metabolic process (GO:0032269)	10/94	0.0109795	0.0770402	2.49082	11.2379	DHFR;RGP1;EIF4ENIF1;DDX3X;DAPK3;RPS3;MALSU1;TYMS;GAPDH;MRPL13
RNA-dependent DNA biosynthetic process (GO:0006278)	5/30	0.0110445	0.0770664	4.17459	18.81	RAD50;DKC1;NHP2;NOP10;TELO2
peptidyl-lysine trimethylation (GO:0018023)	5/30	0.0110445	0.0770664	4.17459	18.81	KMT2A;WDR82;SETD1B;WDR61;OGT
regulation of cellular amino acid metabolic process (GO:0006521)	7/54	0.011335	0.0788439	3.11196	13.9412	PSMA5;PSMA6;PSMC5;PSMA4;PSMD2;PSMC1;PSMC2
regulation of gene silencing by miRNA (GO:0060964)	8/67	0.0113618	0.0788439	2.83449	12.6914	NUP214;SEH1L;POLR2B;POLR2C;POLR2D;STAT3;POLR2G;POLR2K
protein deubiquitination (GO:0016579)	21/267	0.011767	0.0811803	1.79259	7.9635	USP36;TRRAP;MCRS1;ACTL6A;TOMM20;ACTB;PSMA5;CCNA2;PSMA6;PSMC5;PSMA4;COPS5;MYC;PSMD2;PSMC1;PSMC2;TADA3;USP30;SKP2;UBA52;OGT
regulation of cell cycle phase transition (GO:1901987)	10/95	0.0117827	0.0811803	2.46139	10.9313	PSMA5;PSMA6;PSMC5;DBF4;PSMA4;PSMD2;PSMC1;PLK1;PSMC2;BUB3
positive regulation of cellular amide metabolic process (GO:0034250)	9/81	0.0117952	0.0811803	2.61414	11.6069	RPS4X;METTL14;DDX3X;EIF6;ROCK2;NAT10;RPL26;EEF2;MTOR
protein-DNA complex disassembly (GO:0032986)	4/20	0.0118614	0.081414	5.21499	23.1257	SET;RPL23;GRWD1;MYC
mitochondrial protein processing (GO:0034982)	3/11	0.0120575	0.0818678	7.81721	34.537	MIPEP;PMPCB;PMPCA
mitochondrion morphogenesis (GO:0070584)	3/11	0.0120575	0.0818678	7.81721	34.537	SUPV3L1;PNPT1;DNM1L
positive regulation of DNA-dependent DNA replication (GO:2000105)	3/11	0.0120575	0.0818678	7.81721	34.537	DBF4;CDC7;SSBP1
positive regulation of transcription elongation from RNA polymerase II promoter (GO:0032968)	3/11	0.0120575	0.0818678	7.81721	34.537	ELL;EAPP;BRD4
regulation of myeloid cell differentiation (GO:0045637)	8/68	0.0123743	0.0837924	2.78711	12.2414	HSPA9;CBFB;KMT2A;EIF6;PRMT1;RBBP5;WDR5;WDR61
regulation of gene silencing by RNA (GO:0060966)	7/55	0.0124881	0.0841111	3.04697	13.3548	NUP214;SEH1L;POLR2B;POLR2C;POLR2D;POLR2G;POLR2K
regulation of posttranscriptional gene silencing (GO:0060147)	7/55	0.0124881	0.0841111	3.04697	13.3548	NUP214;SEH1L;POLR2B;POLR2C;POLR2D;POLR2G;POLR2K
positive regulation of RNA splicing (GO:0033120)	5/31	0.0126824	0.0849652	4.01382	17.5305	SF3B4;SNW1;NCBP1;U2AF2;ZPR1
protein acetylation (GO:0006473)	5/31	0.0126824	0.0849652	4.01382	17.5305	NAA50;KAT5;KAT6A;NAT10;NAA15
negative regulation of gene expression (GO:0010629)	24/322	0.0138164	0.0923168	1.69218	7.24573	SUZ12;PNPT1;DDX3X;EED;ROCK2;DAPK3;MALSU1;ATP2B1;TYMS;LSM5;MRPL13;HINFP;LSM2;AURKA;DHFR;RPS26;EIF4ENIF1;PTBP1;LSM6;RPS3;VHL;METTL16;GAPDH;RPS13
regulation of transcription by RNA polymerase III (GO:0006359)	4/21	0.0141306	0.0938883	4.90797	20.905	RPTOR;ELL;POLR3F;MTOR
regulation of ubiquitin protein ligase activity (GO:1904666)	4/21	0.0141306	0.0938883	4.90797	20.905	RPS7;RPL23;PLK1;RPL11
cellular response to starvation (GO:0009267)	14/158	0.0141634	0.0938883	2.03672	8.67051	ATP6V1G1;SEH1L;MIOS;WDR24;MTOR;RPTOR;RRAGA;RRAGC;MYBBP1A;LAMTOR2;LAMTOR1;ATP6V1E1;LAMTOR4;LAMTOR3
mitotic spindle assembly (GO:0090307)	6/44	0.0146443	0.0968216	3.29709	13.9259	TPX2;RACGAP1;BCCIP;KIF11;SMC3;SMC1A
mitochondrial genome maintenance (GO:0000002)	3/12	0.0155356	0.102445	6.94827	28.9369	OPA1;TOP3A;LONP1
regulation of cell cycle G2/M phase transition (GO:1902749)	9/85	0.0158505	0.103978	2.47603	10.262	TPX2;TUBA1A;HAUS8;PLK1;HAUS3;MAPRE1;HAUS2;PAFAH1B1;AURKA
Wnt signaling pathway, planar cell polarity pathway (GO:0060071)	9/85	0.0158505	0.103978	2.47603	10.262	PSMA5;PSMA6;PSMC5;PSMA4;PSMD2;PSMC1;CLTC;PSMC2;AP2S1
RNA stabilization (GO:0043489)	5/33	0.0164342	0.107526	3.72673	15.3108	EIF4ENIF1;DKC1;HNRNPU;NAF1;PABPC1
positive regulation of signal transduction by p53 class mediator (GO:1901798)	4/22	0.0166569	0.108701	4.63506	18.9802	RPS15;RPS7;RPL23;RPL37
cellular response to hypoxia (GO:0071456)	12/131	0.0174593	0.113643	2.11063	8.54361	PSMA5;PSMA6;PSMC5;PSMA4;MYC;PSMD2;PSMC1;CUL2;PSMC2;VHL;UBA52;MTOR
regulation of telomerase activity (GO:0051972)	6/46	0.0179949	0.116827	3.13191	12.583	CCT2;DKC1;MYC;TCP1;NAF1;CCT4
regulation of cell cycle (GO:0051726)	22/296	0.0183795	0.119018	1.68541	6.73579	RNF20;CDC123;PNPT1;RPL23;DAPK3;PLK1;STAT3;HNRNPU;WDR12;CDK11B;RNF40;CDK9;BOP1;MYBBP1A;CCND1;MYC;PES1;BIRC5;RPRD1B;MYBL2;SKP2;MAP2K6
antigen processing and presentation of exogenous peptide antigen via MHC class I, TAP-dependent (GO:0002479)	8/73	0.0184505	0.119171	2.57204	10.2693	PSMA5;PSMA6;PSMC5;PSMA4;CHUK;PSMD2;PSMC1;PSMC2
positive regulation of transferase activity (GO:0051347)	13/148	0.0188594	0.121099	2.01605	8.00522	CCT2;RFC2;PLK1;UBE2L3;RAD50;POLG2;DKC1;MYC;TCP1;PIN1;NAF1;RPS2;CCT4
activation of protein kinase C activity (GO:1990051)	2/5	0.0191834	0.121099	13.8857	54.9002	PHB;PHB2
regulation of cytochrome-c oxidase activity (GO:1904959)	2/5	0.0191834	0.121099	13.8857	54.9002	COX17;PHB2
regulation of mitophagy (GO:1901524)	2/5	0.0191834	0.121099	13.8857	54.9002	VPS13D;VDAC1
rRNA transport (GO:0051029)	2/5	0.0191834	0.121099	13.8857	54.9002	PNPT1;MRPL18
spliceosomal conformational changes to generate catalytic conformation (GO:0000393)	2/5	0.0191834	0.121099	13.8857	54.9002	PRPF18;PRPF19
mitochondrial tRNA methylation (GO:0070901)	2/5	0.0191834	0.121099	13.8857	54.9002	TRMT10C;HSD17B10
negative regulation of CD4-positive, alpha-beta T cell differentiation (GO:0043371)	2/5	0.0191834	0.121099	13.8857	54.9002	CBFB;HMGB1
positive regulation of intrinsic apoptotic signaling pathway by p53 class mediator (GO:1902255)	2/5	0.0191834	0.121099	13.8857	54.9002	RPS7;RPL26
protein alkylation (GO:0008213)	4/23	0.0194483	0.121099	4.39088	17.3001	PRMT1;ETF1;FAM98B;SNRPD3
regulation of establishment of planar polarity (GO:0090175)	9/88	0.0195027	0.121099	2.38163	9.37695	PSMA5;PSMA6;PSMC5;PSMA4;PSMD2;PSMC1;CLTC;PSMC2;AP2S1
cell part morphogenesis (GO:0032990)	3/13	0.0195182	0.121099	6.25311	24.6148	SUPV3L1;PNPT1;DNM1L
transcription preinitiation complex assembly (GO:0070897)	3/13	0.0195182	0.121099	6.25311	24.6148	DR1;TBP;TAF12
mitochondrion transport along microtubule (GO:0047497)	3/13	0.0195182	0.121099	6.25311	24.6148	UXT;OPA1;LRPPRC
positive regulation of nuclear-transcribed mRNA poly(A) tail shortening (GO:0060213)	3/13	0.0195182	0.121099	6.25311	24.6148	EIF4ENIF1;POLR2G;PABPC1
protein localization to mitochondrion (GO:0070585)	3/13	0.0195182	0.121099	6.25311	24.6148	MTCH2;COX18;HK2
mitotic nuclear division (GO:0140014)	8/74	0.0198836	0.122516	2.53293	9.92368	TPX2;KIF18B;PLK1;BCCIP;KIF11;SMC3;SMC1A;SMC4
NIK/NF-kappaB signaling (GO:0038061)	8/74	0.0198836	0.122516	2.53293	9.92368	PSMA5;PSMA6;PSMC5;PSMA4;CHUK;PSMD2;PSMC1;PSMC2
chromatin remodeling (GO:0006338)	10/103	0.0198925	0.122516	2.24871	8.80912	DR1;TADA2A;MYC;RUVBL2;ACTL6A;MBD2;SMARCA5;CHD4;MTA2;ACTB
SCF-dependent proteasomal ubiquitin-dependent protein catabolic process (GO:0031146)	9/89	0.0208453	0.128071	2.35173	9.10269	PSMA5;PSMA6;PSMC5;PSMA4;PSMD2;PSMC1;CUL2;PSMC2;SKP2
fibroblast growth factor receptor signaling pathway (GO:0008543)	8/75	0.0213942	0.131124	2.495	9.59236	PTBP1;NCBP1;POLR2B;POLR2C;HNRNPF;POLR2D;POLR2G;POLR2K
protein complex oligomerization (GO:0051259)	9/90	0.0222531	0.136057	2.32258	8.83804	LETM1;NUDT21;PNPT1;OPA1;PRMT1;ZNHIT6;BCL10;DNM1L;ECT2
nucleotide-excision repair, DNA gap filling (GO:0006297)	4/24	0.0225114	0.137303	4.17112	15.8241	RFC2;POLD1;LIG3;UBA52
regulation of cell growth (GO:0001558)	17/217	0.0226215	0.137641	1.78132	6.74917	N6AMT1;NDUFA13;DDX3X;DDX49;TFRC;NCBP1;PHB;ATAD3A;CDK11B;MTOR;RPTOR;SUPV3L1;EXOSC4;EXOSC9;LAMTOR2;LAMTOR1;EXOSC2
positive regulation of cysteine-type endopeptidase activity (GO:2001056)	7/62	0.0230188	0.139722	2.6582	10.0252	NDUFA13;DDX3X;MYC;CYCS;HMGB1;BCL10;BAK1
telomere maintenance via telomere lengthening (GO:0010833)	5/36	0.0233345	0.140958	3.36554	12.6471	RAD50;DKC1;NHP2;NOP10;TELO2
transferrin transport (GO:0033572)	5/36	0.0233345	0.140958	3.36554	12.6471	ATP6V1G1;TFRC;CLTC;ATP6V1E1;DNM2
protein localization to nucleus (GO:0034504)	10/106	0.0237951	0.142343	2.17809	8.14231	NUP214;EIF4ENIF1;PLK1;RPL11;STAT3;HNRNPU;NUTF2;RPF2;IPO7;PHB2
protein modification by small protein conjugation or removal (GO:0070647)	3/14	0.0240095	0.142343	5.68435	21.1987	UBA3;NAE1;SAE1
quinone biosynthetic process (GO:1901663)	3/14	0.0240095	0.142343	5.68435	21.1987	FDXR;COQ6;COQ5
antiviral innate immune response (GO:0140374)	3/14	0.0240095	0.142343	5.68435	21.1987	PHB;ATAD3A;PHB2
cardiolipin metabolic process (GO:0032048)	3/14	0.0240095	0.142343	5.68435	21.1987	PGS1;TAMM41;CRLS1
regulation of IRE1-mediated unfolded protein response (GO:1903894)	3/14	0.0240095	0.142343	5.68435	21.1987	BCL2L11;COPS5;BAK1
N-terminal protein amino acid modification (GO:0031365)	3/14	0.0240095	0.142343	5.68435	21.1987	NAA50;NAA15;METAP1
regulation of apoptotic process (GO:0042981)	46/742	0.0240158	0.142343	1.39354	5.19657	MTCH1;USP36;MTCH2;DDX3X;TFRC;DDX42;DDX20;BCL10;PHB;HMGB1;TRIAP1;PHB2;HSPD1;CASP9;BCL2L11;AIFM1;OPA1;MYC;C1QBP;RPS3;NAE1;BAK1;VHL;DNM1L;SKP2;ECT2;HSPA9;MED1;PRELID1;STIL;APAF1;DAPK3;PLK1;PAWR;WDR73;ATAD3A;DNM2;SUPV3L1;RSL1D1;COPS5;BIRC5;PDCD2;VDAC1;NAA15;UBA52;TPT1
energy derivation by oxidation of organic compounds (GO:0015980)	4/25	0.025852	0.152271	3.97228	14.5201	MYC;CYCS;NDUFS1;COX10
positive regulation of DNA-templated transcription, elongation (GO:0032786)	4/25	0.025852	0.152271	3.97228	14.5201	ELL;ALYREF;EAPP;BRD4
regulation of erythrocyte differentiation (GO:0045646)	5/37	0.0259931	0.152271	3.2602	11.8995	HSPA9;MED1;PRMT1;STAT3;MAPK14
tRNA transport (GO:0051031)	5/37	0.0259931	0.152271	3.2602	11.8995	NUP214;SEH1L;SSB;TOMM20;NOL6
nucleotide-excision repair, DNA incision, 5'-to lesion (GO:0006296)	5/37	0.0259931	0.152271	3.2602	11.8995	RFC2;POLD1;GTF2H4;UBA52;GTF2H5
antigen processing and presentation of exogenous peptide antigen via MHC class I (GO:0042590)	8/78	0.0264098	0.154353	2.38769	8.67692	PSMA5;PSMA6;PSMC5;PSMA4;CHUK;PSMD2;PSMC1;PSMC2
regulation of cellular ketone metabolic process (GO:0010565)	7/64	0.0268987	0.156847	2.56466	9.27298	PSMA5;PSMA6;PSMC5;PSMA4;PSMD2;PSMC1;PSMC2
protein-DNA complex subunit organization (GO:0071824)	2/6	0.0279068	0.157971	10.4138	37.2696	MYC;RPL23
radial glial cell differentiation (GO:0060019)	2/6	0.0279068	0.157971	10.4138	37.2696	METTL14;STAT3
enzyme-directed rRNA pseudouridine synthesis (GO:0000455)	2/6	0.0279068	0.157971	10.4138	37.2696	RPUSD4;DKC1
establishment of mitochondrion localization, microtubule-mediated (GO:0034643)	2/6	0.0279068	0.157971	10.4138	37.2696	UXT;LRPPRC
response to DNA damage checkpoint signaling (GO:0072423)	2/6	0.0279068	0.157971	10.4138	37.2696	APAF1;SMC1A
snoRNA localization (GO:0048254)	2/6	0.0279068	0.157971	10.4138	37.2696	NOP58;ZNHIT6
molybdopterin cofactor biosynthetic process (GO:0032324)	2/6	0.0279068	0.157971	10.4138	37.2696	NFS1;MOCS3
neuroblast proliferation (GO:0007405)	2/6	0.0279068	0.157971	10.4138	37.2696	RACGAP1;PAFAH1B1
peptidyl-glutamine methylation (GO:0018364)	2/6	0.0279068	0.157971	10.4138	37.2696	N6AMT1;TRMT112
positive regulation of autophagy of mitochondrion in response to mitochondrial depolarization (GO:1904925)	2/6	0.0279068	0.157971	10.4138	37.2696	TOMM7;HK2
positive regulation of nuclear cell cycle DNA replication (GO:0010571)	2/6	0.0279068	0.157971	10.4138	37.2696	DBF4;CDC7
pronephros development (GO:0048793)	2/6	0.0279068	0.157971	10.4138	37.2696	SEC61A1;HNF1B
protein localization to nuclear envelope (GO:0090435)	2/6	0.0279068	0.157971	10.4138	37.2696	PLK1;NUTF2
interleukin-1-mediated signaling pathway (GO:0070498)	9/94	0.0285673	0.160603	2.21281	7.86764	PSMA5;PSMA6;PSMC5;PSMA4;CHUK;PSMD2;PSMC1;PSMC2;UBA52
mRNA destabilization (GO:0061157)	5/38	0.0288377	0.160603	3.16124	11.21	FTO;METTL14;ROCK2;POLR2D;METTL16
protein targeting (GO:0006605)	11/125	0.0289054	0.160603	2.01791	7.15093	TIMM10B;SEC61A1;TOMM40;TIMM9;RPL11;TIMM13;TOMM7;TIMM22;TIMM10;TOMM20;TOMM22
clathrin coat assembly (GO:0048268)	3/15	0.0290094	0.160603	5.21038	18.4455	CLTC;AP2S1;PIK3C2A
regulation of nuclear-transcribed mRNA poly(A) tail shortening (GO:0060211)	3/15	0.0290094	0.160603	5.21038	18.4455	EIF4ENIF1;POLR2G;PABPC1
tRNA splicing, via endonucleolytic cleavage and ligation (GO:0006388)	3/15	0.0290094	0.160603	5.21038	18.4455	RTCB;ZBTB8OS;FAM98B
ubiquinone biosynthetic process (GO:0006744)	3/15	0.0290094	0.160603	5.21038	18.4455	FDXR;COQ6;COQ5
ubiquinone metabolic process (GO:0006743)	3/15	0.0290094	0.160603	5.21038	18.4455	FDXR;COQ6;COQ5
negative regulation of ubiquitin-protein transferase activity (GO:0051444)	3/15	0.0290094	0.160603	5.21038	18.4455	RPS7;RPL23;RPL11
positive regulation of chromosome organization (GO:2001252)	3/15	0.0290094	0.160603	5.21038	18.4455	FEN1;RAD50;GNL3
positive regulation of apoptotic process (GO:0043065)	22/310	0.0290981	0.160741	1.60229	5.66744	MTCH1;MTCH2;DDX3X;APAF1;DAPK3;DDX20;PAWR;BCL10;HMGB1;DNM2;HSPD1;CASP9;BCL2L11;AIFM1;MYBBP1A;C1QBP;RPS3;PDCD2;BAK1;ECT2;DNM1L;UBA52
histone methylation (GO:0016571)	4/26	0.0294745	0.162464	3.79153	13.3622	N6AMT1;TRMT112;PRMT5;PRMT1
regulation of intracellular signal transduction (GO:1902531)	29/437	0.0304948	0.167721	1.49305	5.21103	MEAF6;PAK1IP1;RPL11;NOP2;CHD4;RPF2;AURKA;KAT5;RACGAP1;ECT2;MTA2;MAP2K6;PRMT5;BRPF1;TBP;TAF12;RFC2;PDPK1;TOP3A;MAPK14;MTOR;TPX2;BOP1;RAD50;RRAGC;KAT6A;CSNK2B;PIN1;TELO2
response to peptide hormone (GO:0043434)	6/52	0.0310937	0.170643	2.72254	9.44926	EIF2B2;EIF6;ROCK2;STAT3;EIF2B1;OGT
Fc-epsilon receptor signaling pathway (GO:0038095)	10/111	0.03148	0.172387	2.06972	7.15793	PSMA5;PSMA6;PSMC5;PSMA4;CHUK;PDPK1;PSMD2;PSMC1;PSMC2;BCL10
nucleotide-excision repair, DNA incision (GO:0033683)	5/39	0.0318715	0.174152	3.0681	10.5728	RFC2;POLD1;GTF2H4;UBA52;GTF2H5
activation of cysteine-type endopeptidase activity involved in apoptotic process (GO:0006919)	8/81	0.0321893	0.175509	2.28921	7.86599	CASP9;MTCH1;AIFM1;APAF1;CYCS;PDCD2;HSPE1;HSPD1
Fc receptor signaling pathway (GO:0038093)	10/112	0.0332045	0.180449	2.04932	6.97808	PSMA5;PSMA6;PSMC5;PSMA4;CHUK;PDPK1;PSMD2;PSMC1;PSMC2;BCL10
cellular response to DNA damage stimulus (GO:0006974)	24/350	0.0332916	0.180449	1.54453	5.25519	FEN1;MCM7;TRRAP;RFC2;MCM10;SMC6;SMC1A;MAPK14;GTF2H4;HINFP;CASP9;NIPBL;RAD50;BCL2L11;TRIM28;CCND1;RBBP5;MYC;POLD1;RPS3;MMS19;BAK1;NRDE2;MAP2K6
cellular senescence (GO:0090398)	4/27	0.033382	0.180449	3.62649	12.3291	OPA1;KAT6A;SMC6;MAPK14
positive regulation of erythrocyte differentiation (GO:0045648)	4/27	0.033382	0.180449	3.62649	12.3291	MED1;PRMT1;STAT3;MAPK14
cellular macromolecule catabolic process (GO:0044265)	6/53	0.0337532	0.182065	2.66447	9.02905	SUPV3L1;EXOSC7;RNASEH1;PNPT1;NCBP1;SKIV2L
regulation of programmed cell death (GO:0043067)	15/194	0.0341313	0.183421	1.75421	5.92491	USP36;PRELID1;APAF1;DAPK3;DDX42;PHB;TRIAP1;RSL1D1;PSMC5;BCL2L11;RPS3;BIRC5;NAE1;SKP2;TPT1
regulation of cyclin-dependent protein serine/threonine kinase activity (GO:0000079)	8/82	0.0342934	0.183421	2.25815	7.6163	CCNA2;CCND1;CCNH;PLK1;BCCIP;IPO7;ACTB;GTPBP4
cellular response to corticosteroid stimulus (GO:0071384)	3/16	0.0345143	0.183421	4.80933	16.19	BCL2L11;HNRNPU;UBE2L3
RNA splicing, via endonucleolytic cleavage and ligation (GO:0000394)	3/16	0.0345143	0.183421	4.80933	16.19	RTCB;ZBTB8OS;FAM98B
mitotic sister chromatid cohesion (GO:0007064)	3/16	0.0345143	0.183421	4.80933	16.19	NAA50;NIPBL;SMC1A
negative regulation of release of cytochrome c from mitochondria (GO:0090201)	3/16	0.0345143	0.183421	4.80933	16.19	PRELID1;OPA1;TRIAP1
positive regulation of TORC1 signaling (GO:1904263)	3/16	0.0345143	0.183421	4.80933	16.19	RRAGA;SEH1L;TELO2
positive regulation of macromolecule biosynthetic process (GO:0010557)	11/129	0.0352646	0.187014	1.9491	6.51948	RPS4X;METTL14;DDX3X;EIF6;PRMT1;MYC;NAT10;NMD3;RPL26;EEF2;MTOR
regulation of translational initiation (GO:0006446)	7/68	0.0359414	0.190202	2.39598	7.96871	CDC123;DDX3X;EIF2B2;NCBP1;POLR2D;MTIF2;POLR2G
regulation of cyclin-dependent protein kinase activity (GO:1904029)	6/54	0.0365555	0.192456	2.60883	8.63241	CCNA2;CCND1;CCNH;BCCIP;ACTB;GTPBP4
regulation of megakaryocyte differentiation (GO:0045652)	6/54	0.0365555	0.192456	2.60883	8.63241	CBFB;KMT2A;EIF6;PRMT1;RBBP5;WDR5
positive regulation of protein import into nucleus (GO:0042307)	4/28	0.0375768	0.192456	3.4752	11.4034	TRIM28;DMAP1;ECT2;ZPR1
calcium ion export (GO:1901660)	2/7	0.0378952	0.192456	8.33057	27.2654	LETM1;ATP2B1
regulation of miRNA mediated inhibition of translation (GO:1905616)	2/7	0.0378952	0.192456	8.33057	27.2654	EIF4ENIF1;STAT3
regulation of phospholipid transport (GO:2001138)	2/7	0.0378952	0.192456	8.33057	27.2654	PRELID1;TRIAP1
regulation of respiratory system process (GO:0044065)	2/7	0.0378952	0.192456	8.33057	27.2654	MTG1;MTG2
regulation of T cell mediated immune response to tumor cell (GO:0002840)	2/7	0.0378952	0.192456	8.33057	27.2654	HMGB1;HSPD1
histone H3-K14 acetylation (GO:0044154)	2/7	0.0378952	0.192456	8.33057	27.2654	BRPF1;MEAF6
histone H3-K4 dimethylation (GO:0044648)	2/7	0.0378952	0.192456	8.33057	27.2654	KMT2A;SETD1B
ribosomal large subunit export from nucleus (GO:0000055)	2/7	0.0378952	0.192456	8.33057	27.2654	NMD3;SDAD1
ribosomal small subunit export from nucleus (GO:0000056)	2/7	0.0378952	0.192456	8.33057	27.2654	RPS15;NOP9
RIG-I signaling pathway (GO:0039529)	2/7	0.0378952	0.192456	8.33057	27.2654	PHB;PHB2
membrane fission (GO:0090148)	2/7	0.0378952	0.192456	8.33057	27.2654	DNM1L;SLC25A46
tRNA threonylcarbamoyladenosine metabolic process (GO:0070525)	2/7	0.0378952	0.192456	8.33057	27.2654	LAGE3;TRIT1
mRNA pseudouridine synthesis (GO:1990481)	2/7	0.0378952	0.192456	8.33057	27.2654	TRUB2;DKC1
positive regulation of IRE1-mediated unfolded protein response (GO:1903896)	2/7	0.0378952	0.192456	8.33057	27.2654	BCL2L11;BAK1
positive regulation of miRNA mediated inhibition of translation (GO:1905618)	2/7	0.0378952	0.192456	8.33057	27.2654	EIF4ENIF1;STAT3
positive regulation of RNA polymerase II transcription preinitiation complex assembly (GO:0045899)	2/7	0.0378952	0.192456	8.33057	27.2654	PSMC5;PSMC2
protein localization to cytoplasmic stress granule (GO:1903608)	2/7	0.0378952	0.192456	8.33057	27.2654	DDX3X;SSB
response to UV (GO:0009411)	9/99	0.0381018	0.193115	2.08933	6.82687	CASP9;FEN1;CCND1;MYC;RUVBL2;POLD1;RPL26;TRIAP1;BAK1
regulation of release of cytochrome c from mitochondria (GO:0090199)	5/41	0.0385177	0.194832	2.89735	9.43561	PRELID1;BCL2L11;OPA1;TRIAP1;DNM1L
cellular response to lectin (GO:1990858)	10/115	0.0387727	0.195337	1.99046	6.46906	PSMA5;PSMA6;PSMC5;PSMA4;CHUK;PDPK1;PSMD2;PSMC1;PSMC2;BCL10
stimulatory C-type lectin receptor signaling pathway (GO:0002223)	10/115	0.0387727	0.195337	1.99046	6.46906	PSMA5;PSMA6;PSMC5;PSMA4;CHUK;PDPK1;PSMD2;PSMC1;PSMC2;BCL10
regulation of cellular respiration (GO:0043457)	3/17	0.0405177	0.203721	4.46557	14.3167	PRELID1;PNPT1;NOA1
cellular response to light stimulus (GO:0071482)	7/70	0.0411344	0.206148	2.31967	7.40187	CASP9;MYC;RUVBL2;POLD1;TRIAP1;RPL26;BAK1
positive regulation of programmed cell death (GO:0043068)	20/286	0.0411642	0.206148	1.57543	5.02592	MTCH1;MTCH2;DDX3X;APAF1;DAPK3;DDX20;PAWR;BCL10;HMGB1;DNM2;HSPD1;CASP9;BCL2L11;AIFM1;C1QBP;PDCD2;BAK1;ECT2;DNM1L;UBA52
beta-catenin-TCF complex assembly (GO:1904837)	4/29	0.04206	0.209386	3.33602	10.5707	KAT5;TRRAP;RBBP5;MYC
regulation of ubiquitin-protein transferase activity (GO:0051438)	4/29	0.04206	0.209386	3.33602	10.5707	PLK1;PIN1;RPS2;UBE2L3
nucleotide-excision repair, preincision complex assembly (GO:0006294)	4/29	0.04206	0.209386	3.33602	10.5707	CCNH;GTF2H4;UBA52;GTF2H5
regulation of ATP metabolic process (GO:1903578)	6/56	0.042596	0.211636	2.50421	7.90328	NUP214;SEH1L;EIF6;UQCC2;PGAM1;OGT
intrinsic apoptotic signaling pathway (GO:0097193)	9/102	0.0447574	0.221501	2.02161	6.28013	CASP9;BCL2L11;DDX3X;AIFM1;APAF1;MYBBP1A;C1QBP;CUL2;BAK1
positive regulation of cell growth (GO:0030307)	9/102	0.0447574	0.221501	2.02161	6.28013	N6AMT1;RPTOR;SUPV3L1;DDX3X;DDX49;EXOSC4;NCBP1;EXOSC9;EXOSC2
positive regulation of protein-containing complex assembly (GO:0031334)	10/118	0.0449526	0.222031	1.93486	6.00222	PSMC5;BCL2L11;DDX3X;TFRC;DHX33;PSMC2;RPS3;BAK1;GTF2H4;GTF2H5
regulation of carbohydrate catabolic process (GO:0043470)	5/43	0.0459491	0.226066	2.74457	8.45387	NUP214;SEH1L;EIF6;PGAM1;OGT
regulation of purine nucleotide metabolic process (GO:1900542)	5/43	0.0459491	0.226066	2.74457	8.45387	NUP214;SEH1L;EIF6;PGAM1;OGT
positive regulation of protein import (GO:1904591)	4/30	0.0468317	0.228418	3.20754	9.81891	TRIM28;DMAP1;ECT2;ZPR1
cellular response to glucocorticoid stimulus (GO:0071385)	3/18	0.04701	0.228418	4.16765	12.7422	BCL2L11;HNRNPU;UBE2L3
DNA conformation change (GO:0071103)	3/18	0.04701	0.228418	4.16765	12.7422	KAT6A;TOP3A;HMGB1
release of cytochrome c from mitochondria (GO:0001836)	3/18	0.04701	0.228418	4.16765	12.7422	BAK1;DNM1L;TIMM50
mitochondrial fusion (GO:0008053)	3/18	0.04701	0.228418	4.16765	12.7422	OPA1;USP30;THG1L
positive regulation of mRNA splicing, via spliceosome (GO:0048026)	3/18	0.04701	0.228418	4.16765	12.7422	SF3B4;SNW1;NCBP1
cellular response to organonitrogen compound (GO:0071417)	9/103	0.0471381	0.228418	2	6.10935	RPTOR;RRAGA;RRAGC;LAMTOR2;LAMTOR1;LAMTOR4;LAMTOR3;ACTB;MTOR
innate immune response activating cell surface receptor signaling pathway (GO:0002220)	10/119	0.0471526	0.228418	1.91701	5.85524	PSMA5;PSMA6;PSMC5;PSMA4;CHUK;PDPK1;PSMD2;PSMC1;PSMC2;BCL10
positive regulation of nucleic acid-templated transcription (GO:1903508)	32/511	0.0472799	0.228595	1.4027	4.28057	KMT2A;KDM8;YEATS4;BCL10;CTCF;PHB;MRPL12;MED12;MED14;MED13;KAT5;TRIM28;MYC;VHL;BRD4;RNF20;MED1;BRPF1;CHUK;STAT3;HNF1B;MED4;HINFP;DNM2;PSMC5;MED24;KAT6A;TADA3;TFAM;MMS19;NAA15;FOXA2
regulation of endodeoxyribonuclease activity (GO:0032071)	2/8	0.0490146	0.232082	6.94178	20.9339	RPS3;HMGB1
regulation of protein localization to nucleolus (GO:1904749)	2/8	0.0490146	0.232082	6.94178	20.9339	MCRS1;NMD3
establishment of protein localization to chromatin (GO:0071169)	2/8	0.0490146	0.232082	6.94178	20.9339	NIPBL;RUVBL2
regulation of RNA biosynthetic process (GO:2001141)	2/8	0.0490146	0.232082	6.94178	20.9339	MED1;NMD3
histone H3-K4 monomethylation (GO:0097692)	2/8	0.0490146	0.232082	6.94178	20.9339	KMT2A;SETD1B
ribosome disassembly (GO:0032790)	2/8	0.0490146	0.232082	6.94178	20.9339	GFM2;MTIF2
TORC1 signaling (GO:0038202)	2/8	0.0490146	0.232082	6.94178	20.9339	RPTOR;MTOR
translocation of molecules into host (GO:0044417)	2/8	0.0490146	0.232082	6.94178	20.9339	ALYREF;THOC3
viral mRNA export from host cell nucleus (GO:0046784)	2/8	0.0490146	0.232082	6.94178	20.9339	ALYREF;THOC3
negative regulation of alpha-beta T cell differentiation (GO:0046639)	2/8	0.0490146	0.232082	6.94178	20.9339	CBFB;HMGB1
protein localization to microtubule (GO:0035372)	2/8	0.0490146	0.232082	6.94178	20.9339	HNRNPU;MAPRE1
protein import (GO:0017038)	8/89	0.0516486	0.243868	2.06224	6.11103	NUP214;EIF4ENIF1;SAMM50;STAT3;NUTF2;IPO7;PHB2;TOMM22
'de novo' posttranslational protein folding (GO:0051084)	4/31	0.0518908	0.243868	3.08858	9.13792	CHCHD4;HSPA9;CCT2;HSPE1
positive regulation of protein targeting to mitochondrion (GO:1903955)	4/31	0.0518908	0.243868	3.08858	9.13792	USP36;TOMM7;SAE1;UBE2L3
positive regulation of ubiquitin-protein transferase activity (GO:0051443)	4/31	0.0518908	0.243868	3.08858	9.13792	PLK1;PIN1;RPS2;UBE2L3
regulation of autophagy of mitochondrion (GO:1903146)	3/19	0.0539793	0.25321	3.90697	11.405	USP36;VDAC1;DNM1L
regulation of cellular component organization (GO:0051128)	11/139	0.0553184	0.259009	1.79588	5.19843	RPTOR;TFRC;ROCK2;AP2S1;HNRNPU;LAMTOR2;LAMTOR1;ATAD3A;CDK11B;MTOR;AURKA
nucleic acid phosphodiester bond hydrolysis (GO:0090305)	7/75	0.0561688	0.262503	2.14854	6.1865	FEN1;RAD50;RFC2;POLD1;UBA52;GTF2H4;GTF2H5
regulation of DNA metabolic process (GO:0051052)	5/46	0.0585876	0.272795	2.54334	7.21606	CDK9;MYC;ALYREF;WDR18;SUB1
positive regulation of nucleocytoplasmic transport (GO:0046824)	5/46	0.0585876	0.272795	2.54334	7.21606	TRIM28;DMAP1;ECT2;NRDE2;ZPR1
positive regulation of transcription by RNA polymerase II (GO:0045944)	52/908	0.0589032	0.273759	1.27851	3.62055	DDX3X;ELL;MED19;HNRNPU;CCNC;YEATS4;HMGB1;TRIAP1;MED12;MED14;MED13;KAT5;MED10;RUVBL2;MYC;MYBL2;PELP1;ACTR2;MED1;SLC30A9;CHUK;HNF1B;MED4;GNL3;MED24;TFDP1;SUB1;KAT6A;EAPP;UBA52;NUFIP1;KMT2A;MAX;NRF1;LAGE3;RPRD1B;BRD8;BRD4;DR1;MCRS1;STAT3;SMARCA5;HINFP;DRAP1;FOSL1;CDK9;SNW1;COPS5;PIN1;CEBPZ;OGT;FOXA2
regulation of cell division (GO:0051302)	7/76	0.0595354	0.275173	2.11729	5.97328	ORC6;KIF18B;MYC;PLK1;PIN1;PRPF40A;AURKA
establishment of protein localization to organelle (GO:0072594)	7/76	0.0595354	0.275173	2.11729	5.97328	NUP214;EIF4ENIF1;STAT3;NUTF2;IPO7;PHB2;HK2
protein import into nucleus (GO:0006606)	7/76	0.0595354	0.275173	2.11729	5.97328	NUP214;EIF4ENIF1;RPL23;STAT3;NUTF2;IPO7;PHB2
T cell receptor signaling pathway (GO:0050852)	12/158	0.0602893	0.275261	1.71786	4.82479	PSMA5;PSMA6;PSMC5;EIF2B2;PSMA4;CHUK;PDPK1;PSMD2;PSMC1;PSMC2;BCL10;EIF2B1
cellular response to fibroblast growth factor stimulus (GO:0044344)	8/92	0.060552	0.275261	1.98828	5.57563	PTBP1;NCBP1;POLR2B;POLR2C;HNRNPF;POLR2D;POLR2G;POLR2K
negative regulation of mitotic cell cycle phase transition (GO:1901991)	8/92	0.060552	0.275261	1.98828	5.57563	PSMA5;PSMA6;PSMC5;PSMA4;PSMD2;PSMC1;PSMC2;AURKA
CD40 signaling pathway (GO:0023035)	2/9	0.0611401	0.275261	5.94978	16.6272	PHB;PHB2
regulation of DNA-directed DNA polymerase activity (GO:1900262)	2/9	0.0611401	0.275261	5.94978	16.6272	POLG2;RFC2
regulation of nuclear cell cycle DNA replication (GO:0033262)	2/9	0.0611401	0.275261	5.94978	16.6272	DBF4;CDC7
DNA topological change (GO:0006265)	2/9	0.0611401	0.275261	5.94978	16.6272	TOP3A;HMGB1
response to leptin (GO:0044321)	2/9	0.0611401	0.275261	5.94978	16.6272	CCND1;STAT3
histone arginine methylation (GO:0034969)	2/9	0.0611401	0.275261	5.94978	16.6272	PRMT5;PRMT1
negative regulation of RNA catabolic process (GO:1902369)	2/9	0.0611401	0.275261	5.94978	16.6272	NAF1;NRDE2
positive regulation of autophagy of mitochondrion (GO:1903599)	2/9	0.0611401	0.275261	5.94978	16.6272	VPS13D;VDAC1
positive regulation of DNA-directed DNA polymerase activity (GO:1900264)	2/9	0.0611401	0.275261	5.94978	16.6272	POLG2;RFC2
positive regulation of NLRP3 inflammasome complex assembly (GO:1900227)	2/9	0.0611401	0.275261	5.94978	16.6272	DDX3X;DHX33
regulation of nuclear division (GO:0051783)	3/20	0.0614119	0.275261	3.67695	10.2593	PRMT5;DAPK3;PIN1
negative regulation of telomere maintenance via telomerase (GO:0032211)	3/20	0.0614119	0.275261	3.67695	10.2593	EXOSC10;HNRNPU;NAT10
positive regulation of G2/M transition of mitotic cell cycle (GO:0010971)	3/20	0.0614119	0.275261	3.67695	10.2593	CCND1;CDC7;BRD4
positive regulation of interferon-alpha production (GO:0032727)	3/20	0.0614119	0.275261	3.67695	10.2593	DDX3X;CHUK;HSPD1
regulation of histone acetylation (GO:0035065)	4/33	0.0628635	0.280487	2.87527	7.95528	SET;TADA2A;KMT2A;RUVBL2
positive regulation of histone modification (GO:0031058)	4/33	0.0628635	0.280487	2.87527	7.95528	CDK9;NIPBL;TADA2A;RUVBL2
cellular response to UV (GO:0034644)	7/77	0.0630234	0.280487	2.08694	5.76882	CASP9;MYC;RUVBL2;POLD1;TRIAP1;RPL26;BAK1
positive regulation of type I interferon production (GO:0032481)	7/77	0.0630234	0.280487	2.08694	5.76882	DDX3X;CHUK;DHX33;POLR3F;GAPDH;POLR2K;HSPD1
positive regulation of DNA metabolic process (GO:0051054)	6/63	0.0684452	0.302855	2.19587	5.88871	RAD50;TRIM28;MYC;RPS3;HMGB1;GNL3
secondary alcohol biosynthetic process (GO:1902653)	4/34	0.0687707	0.302855	2.77929	7.44009	FDPS;ACLY;GGPS1;HMGCS1
sister chromatid segregation (GO:0000819)	4/34	0.0687707	0.302855	2.77929	7.44009	KIF18B;PLK1;SMC1A;SMC4
tRNA export from nucleus (GO:0006409)	4/34	0.0687707	0.302855	2.77929	7.44009	NUP214;SEH1L;SSB;NOL6
tRNA-containing ribonucleoprotein complex export from nucleus (GO:0071431)	4/34	0.0687707	0.302855	2.77929	7.44009	NUP214;SEH1L;SSB;NOL6
negative regulation of mitochondrion organization (GO:0010823)	4/34	0.0687707	0.302855	2.77929	7.44009	PRELID1;TFRC;OPA1;TRIAP1
regulation of protein serine/threonine kinase activity (GO:0071900)	9/111	0.0692136	0.304089	1.84236	4.92013	RPTOR;CCNA2;DDX3X;CCND1;CCNH;BCCIP;ACTB;GTPBP4;TELO2
protein localization to chromatin (GO:0071168)	3/21	0.0692921	0.304089	3.4725	9.26956	NIPBL;RUVBL2;PLK1
cellular response to oxygen-containing compound (GO:1901701)	21/323	0.0695128	0.304527	1.45585	3.88164	NDUFA13;CHUK;ROCK2;BCL10;HMGB1;MAPK14;ACTB;MTOR;RPTOR;RRAGA;SNW1;KAT5;RRAGC;RUVBL2;RPS3;LAMTOR2;ROMO1;LAMTOR1;CACTIN;LAMTOR4;LAMTOR3
adherens junction assembly (GO:0034333)	2/10	0.0741563	0.317147	5.20579	13.5433	TBCD;ACTB
regulation of attachment of spindle microtubules to kinetochore (GO:0051988)	2/10	0.0741563	0.317147	5.20579	13.5433	RACGAP1;ECT2
regulation of DNA methylation (GO:0044030)	2/10	0.0741563	0.317147	5.20579	13.5433	KMT2A;MYC
regulation of endoplasmic reticulum unfolded protein response (GO:1900101)	2/10	0.0741563	0.317147	5.20579	13.5433	COPS5;BAK1
cellular response to leucine (GO:0071233)	2/10	0.0741563	0.317147	5.20579	13.5433	RPTOR;MTOR
cytoplasmic pattern recognition receptor signaling pathway in response to virus (GO:0039528)	2/10	0.0741563	0.317147	5.20579	13.5433	PHB;PHB2
fructose 6-phosphate metabolic process (GO:0006002)	2/10	0.0741563	0.317147	5.20579	13.5433	PFKL;HK2
response to leucine (GO:0043201)	2/10	0.0741563	0.317147	5.20579	13.5433	RPTOR;MTOR
histone H2B ubiquitination (GO:0033523)	2/10	0.0741563	0.317147	5.20579	13.5433	RNF20;RNF40
low-density lipoprotein particle receptor catabolic process (GO:0032802)	2/10	0.0741563	0.317147	5.20579	13.5433	CLTC;AP2S1
low-density lipoprotein receptor particle metabolic process (GO:0032799)	2/10	0.0741563	0.317147	5.20579	13.5433	CLTC;AP2S1
positive regulation of mRNA 3'-end processing (GO:0031442)	2/10	0.0741563	0.317147	5.20579	13.5433	NUDT21;NCBP1
positive regulation of protein sumoylation (GO:0033235)	2/10	0.0741563	0.317147	5.20579	13.5433	SAE1;GNL3
protein deneddylation (GO:0000338)	2/10	0.0741563	0.317147	5.20579	13.5433	COPS6;COPS5
base-excision repair, gap-filling (GO:0006287)	4/35	0.0749529	0.318392	2.68949	6.96818	FEN1;RFC2;POLD1;LIG3
cholesterol biosynthetic process (GO:0006695)	4/35	0.0749529	0.318392	2.68949	6.96818	FDPS;ACLY;GGPS1;HMGCS1
regulation of mitotic spindle organization (GO:0060236)	4/35	0.0749529	0.318392	2.68949	6.96818	TPX2;CLTC;PLK1;HNRNPU
regulation of TORC1 signaling (GO:1903432)	4/35	0.0749529	0.318392	2.68949	6.96818	RRAGA;SEH1L;RRAGC;TELO2
positive regulation of canonical Wnt signaling pathway (GO:0090263)	10/130	0.0761887	0.323097	1.74027	4.4804	PSMA5;PSMA6;PSMC5;DDX3X;PSMA4;PSMD2;PSMC1;DAPK3;PSMC2;PIN1
mitotic G1 DNA damage checkpoint signaling (GO:0031571)	6/65	0.077192	0.325803	2.12121	5.43339	TFDP1;CCND1;PRMT1;TRIAP1;RPL26;AURKA
error-free translesion synthesis (GO:0070987)	3/22	0.0776029	0.325803	3.28956	8.40861	RFC2;POLD1;UBA52
negative regulation of myeloid cell differentiation (GO:0045638)	3/22	0.0776029	0.325803	3.28956	8.40861	HSPA9;PRMT1;WDR61
nucleotide-excision repair, DNA duplex unwinding (GO:0000717)	3/22	0.0776029	0.325803	3.28956	8.40861	GTF2H4;UBA52;GTF2H5
organelle fusion (GO:0048284)	3/22	0.0776029	0.325803	3.28956	8.40861	OPA1;USP30;THG1L
proteasomal ubiquitin-independent protein catabolic process (GO:0010499)	3/22	0.0776029	0.325803	3.28956	8.40861	PSMA5;PSMA6;PSMA4
iron ion transport (GO:0006826)	5/50	0.0782178	0.327838	2.31678	5.90376	ATP6V1G1;TFRC;CLTC;ATP6V1E1;DNM2
antigen processing and presentation of exogenous peptide antigen via MHC class II (GO:0019886)	8/98	0.0810888	0.339307	1.85514	4.6605	DCTN6;DCTN5;RACGAP1;CAPZB;CLTC;AP2S1;KIF11;DNM2
regulation of embryonic development (GO:0045995)	4/36	0.0814052	0.339503	2.60531	6.53493	NIPBL;RACGAP1;RBM19;FOXA2
regulation of protein import into nucleus (GO:0042306)	4/36	0.0814052	0.339503	2.60531	6.53493	TRIM28;DMAP1;ECT2;ZPR1
glucose 6-phosphate metabolic process (GO:0051156)	3/23	0.0863261	0.357657	3.12492	7.65487	RPIA;PGD;HK2
nucleotide-excision repair, DNA damage recognition (GO:0000715)	3/23	0.0863261	0.357657	3.12492	7.65487	COPS6;COPS5;UBA52
positive regulation of cell cycle G2/M phase transition (GO:1902751)	3/23	0.0863261	0.357657	3.12492	7.65487	CCND1;CDC7;BRD4
positive regulation of mRNA processing (GO:0050685)	3/23	0.0863261	0.357657	3.12492	7.65487	SF3B4;SNW1;NCBP1
telomere maintenance via recombination (GO:0000722)	2/11	0.0879561	0.361438	4.62712	11.2482	RAD50;SMC6
tetrahydrofolate metabolic process (GO:0046653)	2/11	0.0879561	0.361438	4.62712	11.2482	DHFR;TYMS
V(D)J recombination (GO:0033151)	2/11	0.0879561	0.361438	4.62712	11.2482	LIG3;HMGB1
nucleus localization (GO:0051647)	2/11	0.0879561	0.361438	4.62712	11.2482	MTOR;PAFAH1B1
positive regulation of phospholipid transport (GO:2001140)	2/11	0.0879561	0.361438	4.62712	11.2482	PRELID1;TRIAP1
positive regulation of myeloid cell differentiation (GO:0045639)	4/37	0.0881219	0.361529	2.52623	6.13629	MED1;PRMT1;STAT3;MAPK14
antigen processing and presentation of peptide antigen via MHC class II (GO:0002495)	8/100	0.0887486	0.363508	1.81462	4.39492	DCTN6;DCTN5;RACGAP1;CAPZB;CLTC;AP2S1;KIF11;DNM2
signal transduction in response to DNA damage (GO:0042770)	5/52	0.0892011	0.364769	2.21796	5.36051	CASP9;TRIAP1;PRPF19;MAPK14;HINFP
regulation of DNA replication (GO:0006275)	5/53	0.0949769	0.385907	2.17164	5.11231	CCNA2;ORC5;ORC3;SMC3;GTPBP4
sterol biosynthetic process (GO:0016126)	4/38	0.0950965	0.385907	2.4518	5.76874	FDPS;ACLY;GGPS1;HMGCS1
ncRNA export from nucleus (GO:0097064)	4/38	0.0950965	0.385907	2.4518	5.76874	NUP214;SEH1L;SSB;NOL6
negative regulation of ubiquitin-dependent protein catabolic process (GO:2000059)	4/38	0.0950965	0.385907	2.4518	5.76874	RPS7;RPL23;RPL11;OGT
regulation of cell size (GO:0008361)	3/24	0.0954425	0.385907	2.97596	6.99121	RPTOR;LAMTOR4;MTOR
DNA packaging (GO:0006323)	3/24	0.0954425	0.385907	2.97596	6.99121	CHAF1B;AIFM1;KAT6A
nucleotide-binding domain, leucine rich repeat containing receptor signaling pathway (GO:0035872)	3/24	0.0954425	0.385907	2.97596	6.99121	AAMP;UBA52;MAP2K6
negative regulation of cellular catabolic process (GO:0031330)	6/69	0.0964795	0.389474	1.98611	4.64437	RGP1;RRAGA;STAT3;NRDE2;EIF4E;MTOR
regulation of alternative mRNA splicing, via spliceosome (GO:0000381)	5/54	0.100938	0.403829	2.12721	4.87822	SMU1;PTBP1;RBM8A;MAGOH;HNRNPU
antigen processing and presentation of exogenous peptide antigen (GO:0002478)	8/103	0.100997	0.403829	1.75704	4.02831	DCTN6;DCTN5;RACGAP1;CAPZB;CLTC;AP2S1;KIF11;DNM2
regulation of protein targeting to mitochondrion (GO:1903214)	4/39	0.102322	0.403829	2.38162	5.42921	USP36;TOMM7;SAE1;UBE2L3
purine nucleoside monophosphate biosynthetic process (GO:0009127)	2/12	0.10244	0.403829	4.16419	9.48801	GMPS;PFAS
regulation of CD4-positive, alpha-beta T cell differentiation (GO:0043370)	2/12	0.10244	0.403829	4.16419	9.48801	CBFB;HMGB1
regulation of feeding behavior (GO:0060259)	2/12	0.10244	0.403829	4.16419	9.48801	STAT3;CFAP20
cellular response to thyroid hormone stimulus (GO:0097067)	2/12	0.10244	0.403829	4.16419	9.48801	MED1;BRD8
chromatin assembly or disassembly (GO:0006333)	2/12	0.10244	0.403829	4.16419	9.48801	CHAF1B;MTA2
regulation of sister chromatid cohesion (GO:0007063)	2/12	0.10244	0.403829	4.16419	9.48801	FEN1;CTCF
mitochondrion distribution (GO:0048311)	2/12	0.10244	0.403829	4.16419	9.48801	MSTO1;DNM1L
mitotic nuclear membrane disassembly (GO:0007077)	2/12	0.10244	0.403829	4.16419	9.48801	PLK1;VRK1
negative regulation of cell division (GO:0051782)	2/12	0.10244	0.403829	4.16419	9.48801	ORC6;MYC
negative regulation of microtubule polymerization (GO:0031115)	2/12	0.10244	0.403829	4.16419	9.48801	TBCD;MAPRE1
P-body assembly (GO:0033962)	2/12	0.10244	0.403829	4.16419	9.48801	EIF4ENIF1;LSM3
positive regulation of endoplasmic reticulum unfolded protein response (GO:1900103)	2/12	0.10244	0.403829	4.16419	9.48801	BCL2L11;BAK1
regulation of interferon-alpha production (GO:0032647)	3/25	0.104932	0.412362	2.84054	6.40382	DDX3X;CHUK;HSPD1
response to hexose (GO:0009746)	3/25	0.104932	0.412362	2.84054	6.40382	PFKL;EIF2B2;EIF2B1
regulation of G1/S transition of mitotic cell cycle (GO:2000045)	6/71	0.107	0.41885	1.9248	4.30178	LSM10;RPTOR;DDX3X;LSM11;TFDP1;CCND1
protein sumoylation (GO:0016925)	5/55	0.107082	0.41885	2.08456	4.65724	NUP214;SEH1L;TRIM28;SUMO2;SAE1
negative regulation of protein modification by small protein conjugation or removal (GO:1903321)	5/55	0.107082	0.41885	2.08456	4.65724	U2AF2;RPL11;RPS3;OGT;GTPBP4
sensory perception of mechanical stimulus (GO:0050954)	7/88	0.109399	0.427251	1.80248	3.98845	NDUFB9;NIPBL;WDR1;TIMM9;TIMM13;BIRC5;TIMM10
positive regulation of intrinsic apoptotic signaling pathway (GO:2001244)	4/40	0.109792	0.428119	2.31534	5.11499	BCL2L11;RPS7;RPS3;DNM1L
negative regulation of programmed cell death (GO:0043069)	23/381	0.1105	0.430217	1.34407	2.96062	HSPA9;MED1;PRELID1;STIL;DDX3X;TFRC;PLK1;WDR73;TRIAP1;PHB2;ATAD3A;HSPD1;SUPV3L1;PSMC5;COPS5;OPA1;MYC;BIRC5;VDAC1;VHL;NAA15;UBA52;TPT1
organelle organization (GO:0006996)	25/420	0.111844	0.434777	1.32444	2.90137	NRF1;PHB;TFB1M;PHB2;HSD17B10;SEC61A1;CAPZB;OPA1;MSTO1;MYC;LONP1;DNM1L;CENPW;MTX2;VPS13D;PRPF40A;WDR73;TFB2M;POLRMT;ATAD3A;POLG2;RAB18;TFAM;CYCS;SSBP1
DNA damage response, signal transduction by p53 class mediator resulting in cell cycle arrest (GO:0006977)	5/56	0.113404	0.435972	2.04358	4.44845	TFDP1;PRMT1;TRIAP1;RPL26;AURKA
positive regulation of establishment of protein localization to mitochondrion (GO:1903749)	5/56	0.113404	0.435972	2.04358	4.44845	USP36;TFDP1;TOMM7;SAE1;UBE2L3
regulation of cysteine-type endopeptidase activity involved in apoptotic process (GO:0043281)	7/89	0.114329	0.435972	1.78041	3.86112	NDUFA13;DDX3X;MYC;CYCS;HMGB1;TRIAP1;BCL10
DNA geometric change (GO:0032392)	3/26	0.114774	0.435972	2.71689	5.88149	SUPV3L1;RAD50;HMGB1
regulation of telomere maintenance (GO:0032204)	3/26	0.114774	0.435972	2.71689	5.88149	RAD50;MYC;GNL3
global genome nucleotide-excision repair (GO:0070911)	3/26	0.114774	0.435972	2.71689	5.88149	GTF2H4;UBA52;GTF2H5
RNA polyadenylation (GO:0043631)	3/26	0.114774	0.435972	2.71689	5.88149	PNPT1;PABPC1;MTPAP
mRNA polyadenylation (GO:0006378)	3/26	0.114774	0.435972	2.71689	5.88149	PNPT1;PABPC1;MTPAP
negative regulation of proteolysis involved in cellular protein catabolic process (GO:1903051)	3/26	0.114774	0.435972	2.71689	5.88149	RPS7;RPL23;RPL11
negative regulation of telomere maintenance via telomere lengthening (GO:1904357)	3/26	0.114774	0.435972	2.71689	5.88149	EXOSC10;HNRNPU;NAT10
organelle fission (GO:0048285)	3/26	0.114774	0.435972	2.71689	5.88149	OPA1;DNM1L;DNM2
non-canonical Wnt signaling pathway (GO:0035567)	9/124	0.116904	0.435972	1.63297	3.50502	PSMA5;PSMA6;PSMC5;PSMA4;PSMD2;PSMC1;CLTC;PSMC2;AP2S1
protein neddylation (GO:0045116)	2/13	0.117517	0.435972	3.78543	8.10526	UBA3;NAE1
regulation of cell aging (GO:0090342)	2/13	0.117517	0.435972	3.78543	8.10526	RSL1D1;PNPT1
regulation of mRNA metabolic process (GO:1903311)	2/13	0.117517	0.435972	3.78543	8.10526	NCBP1;CDK11B
regulation of protein acetylation (GO:1901983)	2/13	0.117517	0.435972	3.78543	8.10526	DDX3X;KAT5
establishment of protein localization to chromosome (GO:0070199)	2/13	0.117517	0.435972	3.78543	8.10526	NIPBL;RUVBL2
response to interleukin-6 (GO:0070741)	2/13	0.117517	0.435972	3.78543	8.10526	PHB;FOXA2
response to thyroid hormone (GO:0097066)	2/13	0.117517	0.435972	3.78543	8.10526	MED1;BRD8
tRNA 5'-leader removal (GO:0001682)	2/13	0.117517	0.435972	3.78543	8.10526	POP5;SSB
negative regulation of CD4-positive, alpha-beta T cell activation (GO:2000515)	2/13	0.117517	0.435972	3.78543	8.10526	CBFB;HMGB1
negative regulation of stem cell differentiation (GO:2000737)	2/13	0.117517	0.435972	3.78543	8.10526	HNRNPU;NELFB
pentose-phosphate shunt (GO:0006098)	2/13	0.117517	0.435972	3.78543	8.10526	RPIA;PGD
positive regulation of calcineurin-mediated signaling (GO:0106058)	2/13	0.117517	0.435972	3.78543	8.10526	PTBP1;CHERP
positive regulation of calcineurin-NFAT signaling cascade (GO:0070886)	2/13	0.117517	0.435972	3.78543	8.10526	PTBP1;CHERP
positive regulation of lipid transport (GO:0032370)	2/13	0.117517	0.435972	3.78543	8.10526	PRELID1;TRIAP1
positive regulation of mRNA metabolic process (GO:1903313)	2/13	0.117517	0.435972	3.78543	8.10526	NUDT21;PNPT1
positive regulation of protein acetylation (GO:1901985)	2/13	0.117517	0.435972	3.78543	8.10526	DDX3X;KAT5
positive regulation of vascular endothelial cell proliferation (GO:1905564)	2/13	0.117517	0.435972	3.78543	8.10526	PDPK1;HMGB1
pre-mRNA cleavage required for polyadenylation (GO:0098789)	2/13	0.117517	0.435972	3.78543	8.10526	NUDT21;NCBP1
protein heterotetramerization (GO:0051290)	2/13	0.117517	0.435972	3.78543	8.10526	NUDT21;FARSB
negative regulation of DNA recombination (GO:0045910)	5/57	0.119901	0.444162	2.00417	4.25103	POLR2B;POLR2C;POLR2D;POLR2G;POLR2K
regulation of phosphorylation (GO:0042325)	9/125	0.121174	0.448219	1.61881	3.41655	NUP214;SEH1L;EIF6;MCM7;PRKRIP1;PGAM1;PIN1;BCL10;OGT
DNA damage response, signal transduction by p53 class mediator (GO:0030330)	6/74	0.123836	0.457395	1.83959	3.84253	TFDP1;KAT5;PRMT1;TRIAP1;RPL26;AURKA
sensory perception of sound (GO:0007605)	7/91	0.124531	0.458145	1.73783	3.62025	NDUFB9;NIPBL;WDR1;TIMM9;TIMM13;BIRC5;TIMM10
protein peptidyl-prolyl isomerization (GO:0000413)	3/27	0.124949	0.458145	2.60355	5.41501	PPIL1;PPWD1;PIN1
cellular response to unfolded protein (GO:0034620)	3/27	0.124949	0.458145	2.60355	5.41501	HSPA9;BAK1;HSPD1
cytoplasmic pattern recognition receptor signaling pathway (GO:0002753)	3/27	0.124949	0.458145	2.60355	5.41501	AAMP;UBA52;MAP2K6
response to glucocorticoid (GO:0051384)	3/27	0.124949	0.458145	2.60355	5.41501	BCL2L11;HNRNPU;UBE2L3
positive regulation of intracellular signal transduction (GO:1902533)	31/546	0.130988	0.47959	1.26001	2.56115	SEH1L;DDX3X;TFRC;ROCK2;DDX21;BCL10;PHB;HMGB1;PHB2;WDR24;RPS15;RPTOR;BCL2L11;DHX33;C1QBP;RPS3;RPL37;DNM1L;ECT2;BRD4;MIOS;CHUK;PDPK1;RPL23;RRAGA;RRAGC;LAMTOR2;LAMTOR1;LAMTOR4;LAMTOR3;GAPDH
regulation of chromatin organization (GO:1902275)	2/14	0.133102	0.482421	3.4698	6.99734	CDK9;HNRNPU
regulation of intrinsic apoptotic signaling pathway in response to DNA damage by p53 class mediator (GO:1902165)	2/14	0.133102	0.482421	3.4698	6.99734	TRIAP1;RPL26
ribonucleoside monophosphate biosynthetic process (GO:0009156)	2/14	0.133102	0.482421	3.4698	6.99734	GMPS;PFAS
smooth muscle contraction (GO:0006939)	2/14	0.133102	0.482421	3.4698	6.99734	ROCK2;PIK3C2A
mRNA cleavage involved in mRNA processing (GO:0098787)	2/14	0.133102	0.482421	3.4698	6.99734	NUDT21;NCBP1
nuclear membrane disassembly (GO:0051081)	2/14	0.133102	0.482421	3.4698	6.99734	PLK1;VRK1
positive regulation of T cell receptor signaling pathway (GO:0050862)	2/14	0.133102	0.482421	3.4698	6.99734	RPS3;BCL10
negative regulation of autophagy (GO:0010507)	5/59	0.133401	0.482813	1.92974	3.88725	USP36;RRAGA;STAT3;EIF4E;MTOR
cellular response to epidermal growth factor stimulus (GO:0071364)	3/28	0.135433	0.487366	2.49928	4.99675	MED1;PDPK1;ZPR1
cristae formation (GO:0042407)	3/28	0.135433	0.487366	2.49928	4.99675	LETM1;SAMM50;DNAJC11
RNA phosphodiester bond hydrolysis (GO:0090501)	3/28	0.135433	0.487366	2.49928	4.99675	TOE1;RNASEH1;NHP2
nucleotide-binding oligomerization domain containing signaling pathway (GO:0070423)	3/28	0.135433	0.487366	2.49928	4.99675	AAMP;UBA52;MAP2K6
cellular protein catabolic process (GO:0044257)	5/60	0.140396	0.504504	1.89455	3.71956	PSMA6;CLTC;LONP1;AP2S1;PISD
nucleosome organization (GO:0034728)	7/94	0.140665	0.504751	1.67764	3.29049	CHAF1B;SET;ACTR6;GRWD1;SMARCA5;CTCF;DMAP1
intracellular steroid hormone receptor signaling pathway (GO:0030518)	4/44	0.141944	0.507892	2.08337	4.06742	MED1;TADA3;DDX54;PHB
mRNA stabilization (GO:0048255)	4/44	0.141944	0.507892	2.08337	4.06742	EIF4ENIF1;HNRNPU;PABPC1;MAPK14
antigen receptor-mediated signaling pathway (GO:0050851)	12/185	0.144548	0.516478	1.44769	2.80004	PSMA5;PSMA6;PSMC5;EIF2B2;PSMA4;CHUK;PDPK1;PSMD2;PSMC1;PSMC2;BCL10;EIF2B1
negative regulation of mRNA catabolic process (GO:1902373)	3/29	0.146207	0.521106	2.40303	4.62038	EIF4ENIF1;HNRNPU;PABPC1
ciliary basal body-plasma membrane docking (GO:0097711)	7/95	0.146257	0.521106	1.65849	3.18827	TUBA1A;HAUS8;PLK1;HAUS3;MAPRE1;HAUS2;PAFAH1B1
acetyl-CoA metabolic process (GO:0006084)	2/15	0.149116	0.526082	3.20272	6.09488	ACLY;HMGCS1
heterocycle biosynthetic process (GO:0018130)	2/15	0.149116	0.526082	3.20272	6.09488	NFS1;MOCS3
mitotic recombination (GO:0006312)	2/15	0.149116	0.526082	3.20272	6.09488	RAD50;SMC6
nucleosome positioning (GO:0016584)	2/15	0.149116	0.526082	3.20272	6.09488	SMARCA5;CTCF
peptidyl-arginine modification (GO:0018195)	2/15	0.149116	0.526082	3.20272	6.09488	PRMT5;PRMT1
positive regulation of double-strand break repair via homologous recombination (GO:1905168)	2/15	0.149116	0.526082	3.20272	6.09488	ACTR2;MMS19
positive regulation of sprouting angiogenesis (GO:1903672)	2/15	0.149116	0.526082	3.20272	6.09488	PKM;PDPK1
double-strand break repair via nonhomologous end joining (GO:0006303)	5/62	0.154849	0.545546	1.82789	3.40956	RAD50;KAT5;LIG3;HMGB1;PRPF19
mRNA splice site selection (GO:0006376)	3/30	0.157249	0.551684	2.3139	4.28055	SF3A1;SRSF1;SRSF10
positive regulation of DNA recombination (GO:0045911)	3/30	0.157249	0.551684	2.3139	4.28055	ACTR2;TFRC;MMS19
positive regulation of endopeptidase activity (GO:0010950)	3/30	0.157249	0.551684	2.3139	4.28055	PRELID1;ROCK2;STAT3
protein maturation (GO:0051604)	7/97	0.157751	0.552677	1.62147	2.99442	NAA50;ISCA1;MMS19;NAA15;OGT;CIAO1;HSPD1
interleukin-12-mediated signaling pathway (GO:0035722)	4/46	0.159261	0.556418	1.98395	3.64495	HSPA9;HNRNPF;RPLP0;TCP1
posttranscriptional regulation of gene expression (GO:0010608)	4/46	0.159261	0.556418	1.98395	3.64495	NUDT21;METTL16;EIF4E;METAP1
tumor necrosis factor-mediated signaling pathway (GO:0033209)	8/116	0.164108	0.571828	1.54449	2.79124	PSMA5;PSMA6;PSMC5;PSMA4;CHUK;PSMD2;PSMC1;PSMC2
purine ribonucleoside monophosphate biosynthetic process (GO:0009168)	2/16	0.165487	0.571828	2.9738	5.34945	GMPS;PFAS
regulation of intrinsic apoptotic signaling pathway in response to DNA damage (GO:1902229)	2/16	0.165487	0.571828	2.9738	5.34945	RPS3;TPT1
regulation of mitotic sister chromatid separation (GO:0010965)	2/16	0.165487	0.571828	2.9738	5.34945	PTTG1;PLK1
regulation of phosphate metabolic process (GO:0019220)	2/16	0.165487	0.571828	2.9738	5.34945	MCM7;PGAM1
killing by host of symbiont cells (GO:0051873)	2/16	0.165487	0.571828	2.9738	5.34945	ROMO1;GAPDH
mRNA cis splicing, via spliceosome (GO:0045292)	2/16	0.165487	0.571828	2.9738	5.34945	SRSF1;CACTIN
oligodendrocyte development (GO:0014003)	2/16	0.165487	0.571828	2.9738	5.34945	EIF2B2;EIF2B1
positive regulation of Wnt signaling pathway (GO:0030177)	10/153	0.166221	0.573577	1.4586	2.61736	PSMA5;PSMA6;PSMC5;DDX3X;PSMA4;PSMD2;PSMC1;DAPK3;PSMC2;PIN1
regulation of cellular component size (GO:0032535)	3/31	0.168537	0.579979	2.23115	3.97278	RPTOR;LAMTOR4;MTOR
organelle transport along microtubule (GO:0072384)	3/31	0.168537	0.579979	2.23115	3.97278	UXT;LRPPRC;PAFAH1B1
antimicrobial humoral immune response mediated by antimicrobial peptide (GO:0061844)	5/64	0.169887	0.583829	1.76574	3.12998	RPS19;ROMO1;HMGN2;RPL39;GAPDH
regulation of cellular response to stress (GO:0080135)	8/118	0.175156	0.601114	1.51624	2.64142	NUP214;CASP9;RPTOR;RSL1D1;SEH1L;PNPT1;ROCK2;MTOR
cellular response to interleukin-1 (GO:0071347)	10/155	0.175818	0.602565	1.43833	2.50025	PSMA5;PSMA6;PSMC5;PSMA4;CHUK;PSMD2;PSMC1;PSMC2;CACTIN;UBA52
base-excision repair (GO:0006284)	4/48	0.177305	0.60274	1.89357	3.27567	FEN1;RFC2;POLD1;LIG3
cellular response to interleukin-12 (GO:0071349)	4/48	0.177305	0.60274	1.89357	3.27567	HSPA9;HNRNPF;RPLP0;TCP1
cellular response to ionizing radiation (GO:0071479)	4/48	0.177305	0.60274	1.89357	3.27567	NIPBL;RPL26;ECT2;MAPK14
regulation of mitochondrion organization (GO:0010821)	4/48	0.177305	0.60274	1.89357	3.27567	USP36;VDAC1;DNM1L;PISD
nucleus organization (GO:0006997)	4/48	0.177305	0.60274	1.89357	3.27567	USP36;SEH1L;RPS19;WDR73
positive regulation of blood vessel endothelial cell migration (GO:0043536)	4/48	0.177305	0.60274	1.89357	3.27567	PDPK1;HMGB1;PIK3C2A;MAPK14
regulation of cellular catabolic process (GO:0031329)	5/65	0.177612	0.602972	1.73622	3.00045	RPTOR;RRAGA;RRAGC;DAPK3;WDR24
regulation of cellular amide metabolic process (GO:0034248)	3/32	0.180051	0.606348	2.1541	3.69323	PGAM1;EIF4E;METAP1
negative regulation of DNA biosynthetic process (GO:2000279)	3/32	0.180051	0.606348	2.1541	3.69323	EXOSC10;HNRNPU;NAT10
negative regulation of microtubule polymerization or depolymerization (GO:0031111)	3/32	0.180051	0.606348	2.1541	3.69323	TPX2;TBCD;MAPRE1
peptidyl-proline modification (GO:0018208)	3/32	0.180051	0.606348	2.1541	3.69323	PPIL1;PPWD1;PIN1
positive regulation of interleukin-10 production (GO:0032733)	3/32	0.180051	0.606348	2.1541	3.69323	STAT3;HMGB1;HSPD1
positive regulation of telomere maintenance (GO:0032206)	3/32	0.180051	0.606348	2.1541	3.69323	RAD50;NAF1;GNL3
DNA biosynthetic process (GO:0071897)	2/17	0.18215	0.60773	2.7754	4.7263	POLD1;TYMS
regulation of NLRP3 inflammasome complex assembly (GO:1900225)	2/17	0.18215	0.60773	2.7754	4.7263	DDX3X;DHX33
DNA replication checkpoint signaling (GO:0000076)	2/17	0.18215	0.60773	2.7754	4.7263	CDC45;NAE1
RNA interference (GO:0016246)	2/17	0.18215	0.60773	2.7754	4.7263	NRDE2;MRPL44
positive regulation of stem cell proliferation (GO:2000648)	2/17	0.18215	0.60773	2.7754	4.7263	HNRNPU;PDCD2
protein heterooligomerization (GO:0051291)	2/17	0.18215	0.60773	2.7754	4.7263	NUDT21;FARSB
protein localization to chromosome, centromeric region (GO:0071459)	2/17	0.18215	0.60773	2.7754	4.7263	CTCF;BUB3
response to unfolded protein (GO:0006986)	4/49	0.186575	0.620848	1.8514	3.10836	HSPA9;BAK1;HSPE1;HSPD1
mitotic cytokinesis (GO:0000281)	4/49	0.186575	0.620848	1.8514	3.10836	RACGAP1;ROCK2;PLK1;ECT2
regulation of cytokinesis (GO:0032465)	6/84	0.188235	0.625547	1.6029	2.67695	RACGAP1;PLK1;PIN1;PRPF40A;ECT2;AURKA
lytic vacuole organization (GO:0080171)	3/33	0.19177	0.627191	2.08219	3.43865	MBTPS1;LAMTOR1;MTOR
protein homooligomerization (GO:0051260)	8/121	0.192324	0.627191	1.47576	2.43289	LETM1;PNPT1;PRMT1;BCL10;SSBP1;ECT2;HSD17B10;THG1L
regulation of brown fat cell differentiation (GO:0090335)	2/18	0.199042	0.627191	2.6018	4.19992	FTO;HNRNPU
chromatin disassembly (GO:0031498)	2/18	0.199042	0.627191	2.6018	4.19992	SET;GRWD1
regulation of protein sumoylation (GO:0033233)	2/18	0.199042	0.627191	2.6018	4.19992	SAE1;GNL3
regulation of spindle organization (GO:0090224)	2/18	0.199042	0.627191	2.6018	4.19992	TPX2;CLTC
regulation of vascular endothelial cell proliferation (GO:1905562)	2/18	0.199042	0.627191	2.6018	4.19992	PDPK1;HMGB1
rRNA transcription (GO:0009303)	2/18	0.199042	0.627191	2.6018	4.19992	GTF3C4;NIFK
intracellular estrogen receptor signaling pathway (GO:0030520)	2/18	0.199042	0.627191	2.6018	4.19992	TADA3;DDX54
nucleosome disassembly (GO:0006337)	2/18	0.199042	0.627191	2.6018	4.19992	SET;GRWD1
positive regulation of response to endoplasmic reticulum stress (GO:1905898)	2/18	0.199042	0.627191	2.6018	4.19992	BCL2L11;BAK1
protein localization to centrosome (GO:0071539)	2/18	0.199042	0.627191	2.6018	4.19992	STIL;NUDCD3
positive regulation of proteasomal protein catabolic process (GO:1901800)	6/86	0.202448	0.627191	1.56266	2.496	PSMC5;HECTD1;SUMO2;PLK1;PSMC2;ARIH1
regulation of keratinocyte differentiation (GO:0045616)	3/34	0.203673	0.627191	2.01491	3.20621	MED1;CBFB;ROCK2
regulation of lamellipodium assembly (GO:0010591)	3/34	0.203673	0.627191	2.01491	3.20621	NCKAP1;ACTR2;CAPZB
organelle disassembly (GO:1903008)	3/34	0.203673	0.627191	2.01491	3.20621	GFM2;MTIF2;VRK1
organic cyclic compound biosynthetic process (GO:1901362)	3/34	0.203673	0.627191	2.01491	3.20621	NFS1;MOCS3;FDXR
positive regulation of interleukin-12 production (GO:0032735)	3/34	0.203673	0.627191	2.01491	3.20621	HMGB1;MAPK14;HSPD1
positive regulation of pri-miRNA transcription by RNA polymerase II (GO:1902895)	3/34	0.203673	0.627191	2.01491	3.20621	FOSL1;STAT3;GNL3
positive regulation of protein dephosphorylation (GO:0035307)	3/34	0.203673	0.627191	2.01491	3.20621	PTBP1;PIN1;MTOR
regulation of interleukin-12 production (GO:0032655)	4/51	0.205562	0.627191	1.77243	2.804	C1QBP;HMGB1;MAPK14;HSPD1
intrinsic apoptotic signaling pathway in response to DNA damage (GO:0008630)	4/51	0.205562	0.627191	1.77243	2.804	CASP9;BCL2L11;SNW1;BAK1
negative regulation of protein ubiquitination (GO:0031397)	4/51	0.205562	0.627191	1.77243	2.804	U2AF2;RPS3;OGT;GTPBP4
chromatin organization (GO:0006325)	9/142	0.205671	0.627191	1.41063	2.23088	SUPV3L1;DR1;TADA2A;MYC;RUVBL2;ACTL6A;SMARCA5;HMGN2;MTA2
positive regulation of cellular biosynthetic process (GO:0031328)	11/180	0.205718	0.627191	1.35725	2.14614	RPS4X;METTL14;DDX3X;EIF6;PRMT1;MYC;NAT10;NMD3;RPL26;EEF2;MTOR
protein retention in Golgi apparatus (GO:0045053)	1/5	0.209396	0.627191	5.2012	8.13223	VPS13D
pyrimidine deoxyribonucleotide biosynthetic process (GO:0009221)	1/5	0.209396	0.627191	5.2012	8.13223	TYMS
R-loop disassembly (GO:0062176)	1/5	0.209396	0.627191	5.2012	8.13223	DDX21
reelin-mediated signaling pathway (GO:0038026)	1/5	0.209396	0.627191	5.2012	8.13223	PAFAH1B1
regulation of cellular response to osmotic stress (GO:0106049)	1/5	0.209396	0.627191	5.2012	8.13223	LETM1
CD4-positive, alpha-beta T cell activation (GO:0035710)	1/5	0.209396	0.627191	5.2012	8.13223	HMGB1
regulation of cyclase activity (GO:0031279)	1/5	0.209396	0.627191	5.2012	8.13223	MAPK14
regulation of cysteine-type endopeptidase activity involved in execution phase of apoptosis (GO:2001270)	1/5	0.209396	0.627191	5.2012	8.13223	RPS3
regulation of DNA topoisomerase (ATP-hydrolyzing) activity (GO:2000371)	1/5	0.209396	0.627191	5.2012	8.13223	HNRNPU
cellular response to antibiotic (GO:0071236)	1/5	0.209396	0.627191	5.2012	8.13223	RPL23
cellular response to testosterone stimulus (GO:0071394)	1/5	0.209396	0.627191	5.2012	8.13223	ROCK2
chromatin maintenance (GO:0070827)	1/5	0.209396	0.627191	5.2012	8.13223	SUPV3L1
CRD-mediated mRNA stabilization (GO:0070934)	1/5	0.209396	0.627191	5.2012	8.13223	HNRNPU
regulation of miRNA catabolic process (GO:2000625)	1/5	0.209396	0.627191	5.2012	8.13223	PNPT1
dephosphorylation of RNA polymerase II C-terminal domain (GO:0070940)	1/5	0.209396	0.627191	5.2012	8.13223	RPRD1B
disaccharide biosynthetic process (GO:0046351)	1/5	0.209396	0.627191	5.2012	8.13223	SLC2A1
DNA ligation involved in DNA repair (GO:0051103)	1/5	0.209396	0.627191	5.2012	8.13223	LIG3
DNA replication, synthesis of RNA primer (GO:0006269)	1/5	0.209396	0.627191	5.2012	8.13223	PRIM2
regulation of plasma membrane organization (GO:1903729)	1/5	0.209396	0.627191	5.2012	8.13223	MYH9
embryonic viscerocranium morphogenesis (GO:0048703)	1/5	0.209396	0.627191	5.2012	8.13223	NIPBL
regulation of respiratory burst involved in inflammatory response (GO:0060264)	1/5	0.209396	0.627191	5.2012	8.13223	RPS19
extracellular exosome biogenesis (GO:0097734)	1/5	0.209396	0.627191	5.2012	8.13223	COPS5
fatty acid omega-oxidation (GO:0010430)	1/5	0.209396	0.627191	5.2012	8.13223	ADH7
glucose import across plasma membrane (GO:0098708)	1/5	0.209396	0.627191	5.2012	8.13223	SLC2A1
regulation of vascular associated smooth muscle contraction (GO:0003056)	1/5	0.209396	0.627191	5.2012	8.13223	ATP2B1
regulation of vitamin D receptor signaling pathway (GO:0070562)	1/5	0.209396	0.627191	5.2012	8.13223	SNW1
response to acetylcholine (GO:1905144)	1/5	0.209396	0.627191	5.2012	8.13223	ROCK2
histone-threonine phosphorylation (GO:0035405)	1/5	0.209396	0.627191	5.2012	8.13223	VRK1
RNA phosphodiester bond hydrolysis, exonucleolytic (GO:0090503)	1/5	0.209396	0.627191	5.2012	8.13223	TOE1
intracellular distribution of mitochondria (GO:0048312)	1/5	0.209396	0.627191	5.2012	8.13223	DNM1L
SRP-dependent cotranslational protein targeting to membrane, translocation (GO:0006616)	1/5	0.209396	0.627191	5.2012	8.13223	SEC61A1
mitochondrial DNA repair (GO:0043504)	1/5	0.209396	0.627191	5.2012	8.13223	LIG3
mRNA 3'-end processing by stem-loop binding and cleavage (GO:0006398)	1/5	0.209396	0.627191	5.2012	8.13223	LSM11
negative regulation of myosin-light-chain-phosphatase activity (GO:0035509)	1/5	0.209396	0.627191	5.2012	8.13223	ROCK2
oxaloacetate metabolic process (GO:0006107)	1/5	0.209396	0.627191	5.2012	8.13223	ACLY
oxidative DNA demethylation (GO:0035511)	1/5	0.209396	0.627191	5.2012	8.13223	FTO
oxidative RNA demethylation (GO:0035513)	1/5	0.209396	0.627191	5.2012	8.13223	FTO
p38MAPK cascade (GO:0038066)	1/5	0.209396	0.627191	5.2012	8.13223	MAPK14
peptidyl-cysteine S-nitrosylation (GO:0018119)	1/5	0.209396	0.627191	5.2012	8.13223	GAPDH
positive regulation of anoikis (GO:2000210)	1/5	0.209396	0.627191	5.2012	8.13223	MYBBP1A
positive regulation of attachment of spindle microtubules to kinetochore (GO:0051987)	1/5	0.209396	0.627191	5.2012	8.13223	HNRNPU
positive regulation of CD8-positive, alpha-beta T cell differentiation (GO:0043378)	1/5	0.209396	0.627191	5.2012	8.13223	CBFB
positive regulation of dendritic cell differentiation (GO:2001200)	1/5	0.209396	0.627191	5.2012	8.13223	HMGB1
positive regulation of deoxyribonuclease activity (GO:0032077)	1/5	0.209396	0.627191	5.2012	8.13223	RPS3
positive regulation of DNA ligation (GO:0051106)	1/5	0.209396	0.627191	5.2012	8.13223	HMGB1
positive regulation of DNA topoisomerase (ATP-hydrolyzing) activity (GO:2000373)	1/5	0.209396	0.627191	5.2012	8.13223	HNRNPU
positive regulation of dopamine receptor signaling pathway (GO:0060161)	1/5	0.209396	0.627191	5.2012	8.13223	PRMT5
positive regulation of feeding behavior (GO:2000253)	1/5	0.209396	0.627191	5.2012	8.13223	CFAP20
positive regulation of histone H3-K27 methylation (GO:0061087)	1/5	0.209396	0.627191	5.2012	8.13223	OGT
positive regulation of metallopeptidase activity (GO:1905050)	1/5	0.209396	0.627191	5.2012	8.13223	STAT3
positive regulation of nucleobase-containing compound transport (GO:0032241)	1/5	0.209396	0.627191	5.2012	8.13223	NRDE2
positive regulation of RNA export from nucleus (GO:0046833)	1/5	0.209396	0.627191	5.2012	8.13223	NRDE2
positive regulation of toll-like receptor 9 signaling pathway (GO:0034165)	1/5	0.209396	0.627191	5.2012	8.13223	HMGB1
positive regulation of translation in response to stress (GO:0032056)	1/5	0.209396	0.627191	5.2012	8.13223	DDX3X
postsynaptic endocytosis (GO:0140239)	1/5	0.209396	0.627191	5.2012	8.13223	DNM2
postsynaptic neurotransmitter receptor internalization (GO:0098884)	1/5	0.209396	0.627191	5.2012	8.13223	DNM2
protein localization to microtubule end (GO:1905725)	1/5	0.209396	0.627191	5.2012	8.13223	MAPRE1
protein localization to microtubule plus-end (GO:1904825)	1/5	0.209396	0.627191	5.2012	8.13223	MAPRE1
calcium ion transmembrane transport (GO:0070588)	6/87	0.209697	0.627349	1.54329	2.41076	LETM1;PMPCB;PMPCA;PHB;ATP2B1;PHB2
DNA repair (GO:0006281)	17/298	0.210871	0.630111	1.26241	1.96495	FTO;FEN1;SLC30A9;TRRAP;RFC2;SMARCA5;LIG3;SMC1A;GTF2H4;GTF2H5;HINFP;RAD50;KAT5;TRIM28;POLD1;MMS19;UBA52
regulation of intrinsic apoptotic signaling pathway (GO:2001242)	4/52	0.215258	0.632998	1.73541	2.66545	NDUFA13;DDX3X;BCL2L11;DNM1L
cellular response to virus (GO:0098586)	3/35	0.21574	0.632998	1.95184	2.9935	DDX3X;CHUK;MAPK14
regulation of muscle cell differentiation (GO:0051147)	3/35	0.21574	0.632998	1.95184	2.9935	CDK9;PTBP1;MAPK14
positive regulation of immunoglobulin production (GO:0002639)	3/35	0.21574	0.632998	1.95184	2.9935	TFRC;PHB;PHB2
actin filament capping (GO:0051693)	2/19	0.216109	0.632998	2.44863	3.75123	CAPZB;FLII
regulation of bicellular tight junction assembly (GO:2000810)	2/19	0.216109	0.632998	2.44863	3.75123	CBFB;ROCK2
barbed-end actin filament capping (GO:0051016)	2/19	0.216109	0.632998	2.44863	3.75123	CAPZB;FLII
cytoplasmic translational initiation (GO:0002183)	2/19	0.216109	0.632998	2.44863	3.75123	EIF3I;EIF3A
regulation of mitotic spindle assembly (GO:1901673)	2/19	0.216109	0.632998	2.44863	3.75123	PLK1;HNRNPU
DNA double-strand break processing (GO:0000729)	2/19	0.216109	0.632998	2.44863	3.75123	RAD50;KAT5
regulation of stem cell population maintenance (GO:2000036)	2/19	0.216109	0.632998	2.44863	3.75123	MYC;WDR43
histone deubiquitination (GO:0016578)	2/19	0.216109	0.632998	2.44863	3.75123	USP36;TRRAP
maintenance of protein localization in organelle (GO:0072595)	2/19	0.216109	0.632998	2.44863	3.75123	HNRNPU;HK2
peptidyl-lysine dimethylation (GO:0018027)	2/19	0.216109	0.632998	2.44863	3.75123	KMT2A;SETD1B
positive regulation of G protein-coupled receptor signaling pathway (GO:0045745)	2/19	0.216109	0.632998	2.44863	3.75123	PRMT5;PHB
positive regulation of mitochondrial fission (GO:0090141)	2/19	0.216109	0.632998	2.44863	3.75123	DNM1L;AURKA
positive regulation of neutrophil chemotaxis (GO:0090023)	2/19	0.216109	0.632998	2.44863	3.75123	C1QBP;DNM1L
positive regulation of NIK/NF-kappaB signaling (GO:1901224)	4/53	0.225077	0.65079	1.69991	2.53509	DDX3X;RPS3;PHB;PHB2
positive regulation of cellular process (GO:0048522)	33/625	0.225704	0.65079	1.16462	1.73358	N6AMT1;CDC123;DDX3X;DDX49;COX17;NOP2;SMC6;PHB;CIAO1;RPTOR;RPS4X;EXOSC4;RPS19;CCND1;MYC;C1QBP;EXOSC9;RPRD1B;ROMO1;VHL;EXOSC2;NCBP1;PRMT1;RPL23;DHPS;CDC7;WDR77;FOSL1;SUPV3L1;ACLY;BIRC5;FAM98B;EAPP
protein tetramerization (GO:0051262)	5/71	0.226476	0.65079	1.57788	2.34334	NUDT21;SSBP1;HSD17B10;THG1L;FARSB
regulation of glycolytic process (GO:0006110)	5/71	0.226476	0.65079	1.57788	2.34334	NUP214;SEH1L;EIF6;PGAM1;OGT
positive regulation of cellular protein localization (GO:1903829)	5/71	0.226476	0.65079	1.57788	2.34334	TFRC;PLK1;RANGRF;CENPQ;GNL3
membrane fusion (GO:0061025)	3/36	0.227953	0.65079	1.8926	2.79843	OPA1;DNM1L;DNM2
transition metal ion transport (GO:0000041)	3/36	0.227953	0.65079	1.8926	2.79843	SLC30A9;TFRC;COX17
negative regulation of DNA metabolic process (GO:0051053)	3/36	0.227953	0.65079	1.8926	2.79843	KMT2A;SUB1;RPS3
platelet aggregation (GO:0070527)	3/36	0.227953	0.65079	1.8926	2.79843	MYH9;ACTB;METAP1
positive regulation of binding (GO:0051099)	6/90	0.231967	0.65079	1.48794	2.17412	NCBP1;RPL11;DPH3;PIN1;NMD3;HMGB1
adaptive immune response based on somatic recombination of immune receptors built from immunoglobulin superfamily domains (GO:0002460)	2/20	0.233297	0.65079	2.31247	3.36566	STAT3;PHB
purine ribonucleoside monophosphate metabolic process (GO:0009167)	2/20	0.233297	0.65079	2.31247	3.36566	GMPS;PFAS
cellular response to interferon-beta (GO:0035458)	2/20	0.233297	0.65079	2.31247	3.36566	NDUFA13;PNPT1
cortical actin cytoskeleton organization (GO:0030866)	2/20	0.233297	0.65079	2.31247	3.36566	NCKAP1;ROCK2
regulation of protein localization to cell periphery (GO:1904375)	2/20	0.233297	0.65079	2.31247	3.36566	PLK1;ACTB
regulation of smooth muscle contraction (GO:0006940)	2/20	0.233297	0.65079	2.31247	3.36566	DAPK3;ATP2B1
eye morphogenesis (GO:0048592)	2/20	0.233297	0.65079	2.31247	3.36566	NIPBL;STAT3
hepaticobiliary system development (GO:0061008)	2/20	0.233297	0.65079	2.31247	3.36566	NIPBL;GFER
negative regulation of cyclin-dependent protein serine/threonine kinase activity (GO:0045736)	2/20	0.233297	0.65079	2.31247	3.36566	PLK1;IPO7
nucleobase-containing compound biosynthetic process (GO:0034654)	2/20	0.233297	0.65079	2.31247	3.36566	POLD1;TYMS
oligodendrocyte differentiation (GO:0048709)	2/20	0.233297	0.65079	2.31247	3.36566	EIF2B2;EIF2B1
positive regulation of activated T cell proliferation (GO:0042104)	2/20	0.233297	0.65079	2.31247	3.36566	RPS3;HMGB1
positive regulation of embryonic development (GO:0040019)	2/20	0.233297	0.65079	2.31247	3.36566	RBM19;FOXA2
positive regulation of peptidyl-lysine acetylation (GO:2000758)	2/20	0.233297	0.65079	2.31247	3.36566	TADA2A;RUVBL2
post-transcriptional gene silencing by RNA (GO:0035194)	2/20	0.233297	0.65079	2.31247	3.36566	EIF6;NRDE2
negative regulation of cellular macromolecule biosynthetic process (GO:2000113)	29/547	0.236366	0.65079	1.16906	1.68623	NDUFA13;SET;DDX3X;KDM8;CTCF;PHB;MALSU1;TYMS;PHB2;MRPL13;EIF4ENIF1;NIPBL;BTAF1;KAT5;TRIM28;RPS3;DMAP1;EED;DAPK3;MBD2;GTPBP4;HINFP;DHFR;SNW1;MYBBP1A;YEATS2;KAT6A;BIRC5;GAPDH
positive regulation of intracellular protein transport (GO:0090316)	9/148	0.240135	0.65079	1.34931	1.92486	USP36;TFDP1;TRIM28;TOMM7;DMAP1;ECT2;SAE1;UBE2L3;ZPR1
regulation of transport (GO:0051049)	3/37	0.240291	0.65079	1.83684	2.61916	MBTPS1;YRDC;ACTB
regulation of blood vessel endothelial cell migration (GO:0043535)	4/55	0.245042	0.65079	1.63307	2.29663	PDPK1;CSNK2B;HMGB1;MAPK14
5S class rRNA transcription by RNA polymerase III (GO:0042791)	1/6	0.245693	0.65079	4.16074	5.84031	GTF3C4
adiponectin-activated signaling pathway (GO:0033211)	1/6	0.245693	0.65079	4.16074	5.84031	CSNK2B
pteridine-containing compound biosynthetic process (GO:0042559)	1/6	0.245693	0.65079	4.16074	5.84031	DHFR
purine nucleobase biosynthetic process (GO:0009113)	1/6	0.245693	0.65079	4.16074	5.84031	GMPS
pyrimidine nucleotide-sugar transmembrane transport (GO:0090481)	1/6	0.245693	0.65079	4.16074	5.84031	SLC35B1
regulation of 3'-UTR-mediated mRNA stabilization (GO:1905868)	1/6	0.245693	0.65079	4.16074	5.84031	METTL16
ATP synthesis coupled electron transport (GO:0042773)	1/6	0.245693	0.65079	4.16074	5.84031	COA6
regulation of cellular response to hypoxia (GO:1900037)	1/6	0.245693	0.65079	4.16074	5.84031	ROCK2
regulation of DNA-dependent DNA replication initiation (GO:0030174)	1/6	0.245693	0.65079	4.16074	5.84031	WDR18
regulation of glucokinase activity (GO:0033131)	1/6	0.245693	0.65079	4.16074	5.84031	FOXA2
cellular response to lipoteichoic acid (GO:0071223)	1/6	0.245693	0.65079	4.16074	5.84031	MAPK14
regulation of hematopoietic stem cell proliferation (GO:1902033)	1/6	0.245693	0.65079	4.16074	5.84031	PDCD2
regulation of hyaluronan biosynthetic process (GO:1900125)	1/6	0.245693	0.65079	4.16074	5.84031	CLTC
cellular response to X-ray (GO:0071481)	1/6	0.245693	0.65079	4.16074	5.84031	NIPBL
centromeric sister chromatid cohesion (GO:0070601)	1/6	0.245693	0.65079	4.16074	5.84031	NAA50
regulation of macromolecule biosynthetic process (GO:0010556)	1/6	0.245693	0.65079	4.16074	5.84031	MED1
regulation of membrane tubulation (GO:1903525)	1/6	0.245693	0.65079	4.16074	5.84031	DNM2
regulation of microtubule motor activity (GO:2000574)	1/6	0.245693	0.65079	4.16074	5.84031	PAFAH1B1
ear development (GO:0043583)	1/6	0.245693	0.65079	4.16074	5.84031	NIPBL
regulation of pro-B cell differentiation (GO:2000973)	1/6	0.245693	0.65079	4.16074	5.84031	NUDT21
regulation of protein depolymerization (GO:1901879)	1/6	0.245693	0.65079	4.16074	5.84031	WDR1
regulation of response to reactive oxygen species (GO:1901031)	1/6	0.245693	0.65079	4.16074	5.84031	DHFR
regulation of superoxide metabolic process (GO:0090322)	1/6	0.245693	0.65079	4.16074	5.84031	DHFR
GDP-mannose metabolic process (GO:0019673)	1/6	0.245693	0.65079	4.16074	5.84031	GMPPB
glandular epithelial cell differentiation (GO:0002067)	1/6	0.245693	0.65079	4.16074	5.84031	WDR77
replication-born double-strand break repair via sister chromatid exchange (GO:1990414)	1/6	0.245693	0.65079	4.16074	5.84031	NIPBL
response to angiotensin (GO:1990776)	1/6	0.245693	0.65079	4.16074	5.84031	ROCK2
hexose import across plasma membrane (GO:0140271)	1/6	0.245693	0.65079	4.16074	5.84031	SLC2A1
response to lipoteichoic acid (GO:0070391)	1/6	0.245693	0.65079	4.16074	5.84031	MAPK14
histone H4-K12 acetylation (GO:0043983)	1/6	0.245693	0.65079	4.16074	5.84031	MEAF6
response to testosterone (GO:0033574)	1/6	0.245693	0.65079	4.16074	5.84031	ROCK2
histone-serine phosphorylation (GO:0035404)	1/6	0.245693	0.65079	4.16074	5.84031	VRK1
IMP biosynthetic process (GO:0006188)	1/6	0.245693	0.65079	4.16074	5.84031	PFAS
isoleucine metabolic process (GO:0006549)	1/6	0.245693	0.65079	4.16074	5.84031	HSD17B10
macromolecule biosynthetic process (GO:0009059)	1/6	0.245693	0.65079	4.16074	5.84031	RPS23
T-helper 17 cell lineage commitment (GO:0072540)	1/6	0.245693	0.65079	4.16074	5.84031	STAT3
medium-chain fatty acid biosynthetic process (GO:0051792)	1/6	0.245693	0.65079	4.16074	5.84031	OXSM
megakaryocyte development (GO:0035855)	1/6	0.245693	0.65079	4.16074	5.84031	MED1
tRNA pseudouridine synthesis (GO:0031119)	1/6	0.245693	0.65079	4.16074	5.84031	RPUSD4
mitochondrial protein catabolic process (GO:0035694)	1/6	0.245693	0.65079	4.16074	5.84031	PISD
morphogenesis of an endothelium (GO:0003159)	1/6	0.245693	0.65079	4.16074	5.84031	CSNK2B
mRNA 3'-splice site recognition (GO:0000389)	1/6	0.245693	0.65079	4.16074	5.84031	SF3A1
mRNA 5'-splice site recognition (GO:0000395)	1/6	0.245693	0.65079	4.16074	5.84031	SRSF1
negative regulation of cytosolic calcium ion concentration (GO:0051481)	1/6	0.245693	0.65079	4.16074	5.84031	ATP2B1
negative regulation of erythrocyte differentiation (GO:0045647)	1/6	0.245693	0.65079	4.16074	5.84031	HSPA9
negative regulation of fat cell proliferation (GO:0070345)	1/6	0.245693	0.65079	4.16074	5.84031	TFDP1
negative regulation of glucocorticoid receptor signaling pathway (GO:2000323)	1/6	0.245693	0.65079	4.16074	5.84031	PHB
negative regulation of hematopoietic progenitor cell differentiation (GO:1901533)	1/6	0.245693	0.65079	4.16074	5.84031	METTL14
nephron tubule development (GO:0072080)	1/6	0.245693	0.65079	4.16074	5.84031	HNF1B
neuroepithelial cell differentiation (GO:0060563)	1/6	0.245693	0.65079	4.16074	5.84031	BCCIP
pentose-phosphate shunt, non-oxidative branch (GO:0009052)	1/6	0.245693	0.65079	4.16074	5.84031	RPIA
positive regulation of activin receptor signaling pathway (GO:0032927)	1/6	0.245693	0.65079	4.16074	5.84031	CSNK2B
positive regulation of endoplasmic reticulum stress-induced intrinsic apoptotic signaling pathway (GO:1902237)	1/6	0.245693	0.65079	4.16074	5.84031	BCL2L11
positive regulation of hemoglobin biosynthetic process (GO:0046985)	1/6	0.245693	0.65079	4.16074	5.84031	PRMT1
positive regulation of histone phosphorylation (GO:0033129)	1/6	0.245693	0.65079	4.16074	5.84031	CDK9
positive regulation of immune response to tumor cell (GO:0002839)	1/6	0.245693	0.65079	4.16074	5.84031	HSPD1
positive regulation of kidney development (GO:0090184)	1/6	0.245693	0.65079	4.16074	5.84031	MYC
positive regulation of RNA binding (GO:1905216)	1/6	0.245693	0.65079	4.16074	5.84031	NCBP1
positive regulation of T cell mediated immune response to tumor cell (GO:0002842)	1/6	0.245693	0.65079	4.16074	5.84031	HSPD1
positive regulation of toll-like receptor 7 signaling pathway (GO:0034157)	1/6	0.245693	0.65079	4.16074	5.84031	DDX3X
protein insertion into mitochondrial membrane involved in apoptotic signaling pathway (GO:0001844)	1/6	0.245693	0.65079	4.16074	5.84031	BCL2L11
protein localization to nucleolus (GO:1902570)	1/6	0.245693	0.65079	4.16074	5.84031	RPF2
androgen metabolic process (GO:0008209)	2/21	0.250561	0.653378	2.19065	3.03197	MED1;HSD17B10
regulation of cell-substrate junction assembly (GO:0090109)	2/21	0.250561	0.653378	2.19065	3.03197	ROCK2;DAPK3
cellular response to estradiol stimulus (GO:0071392)	2/21	0.250561	0.653378	2.19065	3.03197	KAT5;RUVBL2
cellular response to steroid hormone stimulus (GO:0071383)	2/21	0.250561	0.653378	2.19065	3.03197	MED1;UBE2L3
error-prone translesion synthesis (GO:0042276)	2/21	0.250561	0.653378	2.19065	3.03197	RFC2;UBA52
extrinsic apoptotic signaling pathway in absence of ligand (GO:0097192)	2/21	0.250561	0.653378	2.19065	3.03197	CASP9;BAK1
histone ubiquitination (GO:0016574)	2/21	0.250561	0.653378	2.19065	3.03197	RNF20;RNF40
spindle assembly checkpoint signaling (GO:0071173)	2/21	0.250561	0.653378	2.19065	3.03197	PLK1;BUB3
stress granule assembly (GO:0034063)	2/21	0.250561	0.653378	2.19065	3.03197	DDX3X;RPS23
mitotic spindle assembly checkpoint signaling (GO:0007094)	2/21	0.250561	0.653378	2.19065	3.03197	PLK1;BUB3
mitotic spindle checkpoint signaling (GO:0071174)	2/21	0.250561	0.653378	2.19065	3.03197	PLK1;BUB3
neuron apoptotic process (GO:0051402)	2/21	0.250561	0.653378	2.19065	3.03197	NAE1;GAPDH
nucleotide-excision repair, DNA incision, 3'-to lesion (GO:0006295)	2/21	0.250561	0.653378	2.19065	3.03197	GTF2H4;GTF2H5
nucleotide-excision repair, preincision complex stabilization (GO:0006293)	2/21	0.250561	0.653378	2.19065	3.03197	GTF2H4;GTF2H5
positive regulation of antigen receptor-mediated signaling pathway (GO:0050857)	2/21	0.250561	0.653378	2.19065	3.03197	RPS3;BCL10
response to estradiol (GO:0032355)	3/38	0.252736	0.657688	1.78426	2.45409	KAT5;RUVBL2;STAT3
lysosome organization (GO:0007040)	3/38	0.252736	0.657688	1.78426	2.45409	MBTPS1;LAMTOR1;MTOR
regulation of exit from mitosis (GO:0007096)	3/39	0.26527	0.682263	1.73461	2.30184	BUB3;PHB2;UBA52
DNA integrity checkpoint signaling (GO:0031570)	3/39	0.26527	0.682263	1.73461	2.30184	CDC45;PRPF19;HINFP
DNA recombination (GO:0006310)	3/39	0.26527	0.682263	1.73461	2.30184	SUPV3L1;RAD50;HMGB1
response to peptide (GO:1901652)	3/39	0.26527	0.682263	1.73461	2.30184	EIF2B2;STAT3;EIF2B1
organophosphate biosynthetic process (GO:0090407)	3/39	0.26527	0.682263	1.73461	2.30184	NFS1;MOCS3;TPI1
regulation of mitotic nuclear division (GO:0007088)	4/57	0.265377	0.682263	1.57128	2.08447	PRMT5;DAPK3;PIN1;AURKA
positive regulation of proteolysis (GO:0045862)	4/57	0.265377	0.682263	1.57128	2.08447	NDUFA13;PLK1;BAK1;OGT
regulation of centrosome cycle (GO:0046605)	2/22	0.267857	0.682263	2.081	2.74131	NAT10;AURKA
regulation of endoplasmic reticulum stress-induced intrinsic apoptotic signaling pathway (GO:1902235)	2/22	0.267857	0.682263	2.081	2.74131	BCL2L11;OPA1
heme biosynthetic process (GO:0006783)	2/22	0.267857	0.682263	2.081	2.74131	FECH;COX10
negative regulation of cyclin-dependent protein kinase activity (GO:1904030)	2/22	0.267857	0.682263	2.081	2.74131	PLK1;IPO7
negative regulation of mitotic metaphase/anaphase transition (GO:0045841)	2/22	0.267857	0.682263	2.081	2.74131	PLK1;BUB3
positive regulation of granulocyte chemotaxis (GO:0071624)	2/22	0.267857	0.682263	2.081	2.74131	C1QBP;DNM1L
positive regulation of neutrophil migration (GO:1902624)	2/22	0.267857	0.682263	2.081	2.74131	C1QBP;DNM1L
positive regulation of peptidase activity (GO:0010952)	2/22	0.267857	0.682263	2.081	2.74131	NDUFA13;PRELID1
cellular response to hormone stimulus (GO:0032870)	5/76	0.26983	0.682263	1.46638	1.9209	MED1;STAT3;BRD8;UBE2L3;PELP1
positive regulation of mitochondrion organization (GO:0010822)	4/58	0.275659	0.682263	1.5421	1.98714	BCL2L11;BAK1;DNM1L;AURKA
regulation of microtubule polymerization (GO:0031113)	3/40	0.277877	0.682263	1.68764	2.16115	RPS3;TBCD;MAPRE1
response to organonitrogen compound (GO:0010243)	3/40	0.277877	0.682263	1.68764	2.16115	DHFR;RRAGC;MTOR
proton-transporting ATP synthase complex assembly (GO:0043461)	1/7	0.280326	0.682263	3.4671	4.40946	ATPAF2
aldehyde biosynthetic process (GO:0046184)	1/7	0.280326	0.682263	3.4671	4.40946	TPI1
astrocyte differentiation (GO:0048708)	1/7	0.280326	0.682263	3.4671	4.40946	STAT3
regulation of CD8-positive, alpha-beta T cell differentiation (GO:0043376)	1/7	0.280326	0.682263	3.4671	4.40946	CBFB
cellular cation homeostasis (GO:0030003)	1/7	0.280326	0.682263	3.4671	4.40946	LETM1
regulation of fat cell proliferation (GO:0070344)	1/7	0.280326	0.682263	3.4671	4.40946	TFDP1
regulation of glucocorticoid receptor signaling pathway (GO:2000322)	1/7	0.280326	0.682263	3.4671	4.40946	PHB
regulation of hemoglobin biosynthetic process (GO:0046984)	1/7	0.280326	0.682263	3.4671	4.40946	PRMT1
regulation of histone H3-K27 methylation (GO:0061085)	1/7	0.280326	0.682263	3.4671	4.40946	OGT
regulation of MDA-5 signaling pathway (GO:0039533)	1/7	0.280326	0.682263	3.4671	4.40946	C1QBP
regulation of myosin-light-chain-phosphatase activity (GO:0035507)	1/7	0.280326	0.682263	3.4671	4.40946	ROCK2
DNA ligation (GO:0006266)	1/7	0.280326	0.682263	3.4671	4.40946	LIG3
regulation of toll-like receptor 7 signaling pathway (GO:0034155)	1/7	0.280326	0.682263	3.4671	4.40946	DDX3X
glyceraldehyde-3-phosphate metabolic process (GO:0019682)	1/7	0.280326	0.682263	3.4671	4.40946	TPI1
Golgi disassembly (GO:0090166)	1/7	0.280326	0.682263	3.4671	4.40946	VRK1
response to host defenses (GO:0052200)	1/7	0.280326	0.682263	3.4671	4.40946	UBA52
response to increased oxygen levels (GO:0036296)	1/7	0.280326	0.682263	3.4671	4.40946	ATP6V1G1
smooth muscle cell migration (GO:0014909)	1/7	0.280326	0.682263	3.4671	4.40946	AAMP
synaptic vesicle budding from presynaptic endocytic zone membrane (GO:0016185)	1/7	0.280326	0.682263	3.4671	4.40946	DNM2
T-helper 17 cell differentiation (GO:0072539)	1/7	0.280326	0.682263	3.4671	4.40946	STAT3
tRNA transcription by RNA polymerase III (GO:0042797)	1/7	0.280326	0.682263	3.4671	4.40946	GTF3C4
modulation by symbiont of host defense response (GO:0052031)	1/7	0.280326	0.682263	3.4671	4.40946	UBA52
mRNA transcription by RNA polymerase II (GO:0042789)	1/7	0.280326	0.682263	3.4671	4.40946	MED1
negative regulation of DNA repair (GO:0045738)	1/7	0.280326	0.682263	3.4671	4.40946	RPS3
negative regulation of RIG-I signaling pathway (GO:0039536)	1/7	0.280326	0.682263	3.4671	4.40946	C1QBP
negative regulation of stress-activated protein kinase signaling cascade (GO:0070303)	1/7	0.280326	0.682263	3.4671	4.40946	MYC
negative regulation of telomere capping (GO:1904354)	1/7	0.280326	0.682263	3.4671	4.40946	RAD50
nucleobase biosynthetic process (GO:0046112)	1/7	0.280326	0.682263	3.4671	4.40946	GMPS
oxygen transport (GO:0015671)	1/7	0.280326	0.682263	3.4671	4.40946	MYC
pantothenate metabolic process (GO:0015939)	1/7	0.280326	0.682263	3.4671	4.40946	AASDHPPT
pentose metabolic process (GO:0019321)	1/7	0.280326	0.682263	3.4671	4.40946	RPIA
pexophagy (GO:0000425)	1/7	0.280326	0.682263	3.4671	4.40946	USP30
photoreceptor cell differentiation (GO:0046530)	1/7	0.280326	0.682263	3.4671	4.40946	STAT3
positive regulation by symbiont of host autophagy (GO:0075044)	1/7	0.280326	0.682263	3.4671	4.40946	PHB2
positive regulation of aspartic-type endopeptidase activity involved in amyloid precursor protein catabolic process (GO:1902961)	1/7	0.280326	0.682263	3.4671	4.40946	ROCK2
positive regulation of chemokine (C-X-C motif) ligand 2 production (GO:2000343)	1/7	0.280326	0.682263	3.4671	4.40946	HMGB1
positive regulation of cytoplasmic translation (GO:2000767)	1/7	0.280326	0.682263	3.4671	4.40946	PKM
positive regulation of fibroblast apoptotic process (GO:2000271)	1/7	0.280326	0.682263	3.4671	4.40946	BCL2L11
positive regulation of gastrulation (GO:2000543)	1/7	0.280326	0.682263	3.4671	4.40946	FOXA2
positive regulation of helicase activity (GO:0051096)	1/7	0.280326	0.682263	3.4671	4.40946	SSBP1
positive regulation of humoral immune response (GO:0002922)	1/7	0.280326	0.682263	3.4671	4.40946	PHB
positive regulation of lymphocyte apoptotic process (GO:0070230)	1/7	0.280326	0.682263	3.4671	4.40946	PRELID1
positive regulation of miRNA metabolic process (GO:2000630)	1/7	0.280326	0.682263	3.4671	4.40946	PNPT1
positive regulation of mitophagy in response to mitochondrial depolarization (GO:0098779)	1/7	0.280326	0.682263	3.4671	4.40946	TOMM7
positive regulation of mRNA binding (GO:1902416)	1/7	0.280326	0.682263	3.4671	4.40946	CDK9
positive regulation of respiratory burst (GO:0060267)	1/7	0.280326	0.682263	3.4671	4.40946	RPS19
positive regulation of trophoblast cell migration (GO:1901165)	1/7	0.280326	0.682263	3.4671	4.40946	C1QBP
posttranslational protein targeting to membrane, translocation (GO:0031204)	1/7	0.280326	0.682263	3.4671	4.40946	SEC61A1
cytoskeleton-dependent intracellular transport (GO:0030705)	2/23	0.285145	0.690655	1.9818	2.48668	TUBA1C;TUBA1A
DNA methylation (GO:0006306)	2/23	0.285145	0.690655	1.9818	2.48668	N6AMT1;DMAP1
response to nutrient levels (GO:0031667)	2/23	0.285145	0.690655	1.9818	2.48668	RPTOR;MTOR
positive regulation of histone acetylation (GO:0035066)	2/23	0.285145	0.690655	1.9818	2.48668	TADA2A;RUVBL2
positive regulation of protein autophosphorylation (GO:0031954)	2/23	0.285145	0.690655	1.9818	2.48668	RAD50;DDX3X
positive regulation of apoptotic signaling pathway (GO:2001235)	4/59	0.286005	0.692071	1.51398	1.89513	BCL2L11;RPS3;BCL10;DNM1L
negative regulation of apoptotic signaling pathway (GO:2001234)	5/78	0.287658	0.695404	1.42605	1.77684	NDUFA13;PRELID1;DDX3X;OPA1;TRIAP1
peptidyl-serine phosphorylation (GO:0018105)	9/156	0.288893	0.697719	1.27534	1.58359	CHUK;PDPK1;ROCK2;PLK1;VRK1;CDC7;MAPK14;MTOR;AURKA
cortical cytoskeleton organization (GO:0030865)	3/41	0.290538	0.699012	1.64314	2.03095	NCKAP1;ROCK2;PPP2R3C
regulation of mitochondrial membrane potential (GO:0051881)	3/41	0.290538	0.699012	1.64314	2.03095	PRELID1;NDUFS1;BAK1
regulation of response to DNA damage stimulus (GO:2001020)	3/41	0.290538	0.699012	1.64314	2.03095	CASP9;CDK9;MYC
gluconeogenesis (GO:0006094)	3/41	0.290538	0.699012	1.64314	2.03095	TPI1;PGAM1;GAPDH
C21-steroid hormone metabolic process (GO:0008207)	2/24	0.302391	0.710514	1.89162	2.26245	FDXR;HSD17B10
defense response to fungus (GO:0050832)	2/24	0.302391	0.710514	1.89162	2.26245	BCL10;GAPDH
establishment of mitotic spindle orientation (GO:0000132)	2/24	0.302391	0.710514	1.89162	2.26245	PLK1;PAFAH1B1
response to gamma radiation (GO:0010332)	2/24	0.302391	0.710514	1.89162	2.26245	MYC;RPL26
heterochromatin assembly (GO:0031507)	2/24	0.302391	0.710514	1.89162	2.26245	MBD2;NRDE2
histone monoubiquitination (GO:0010390)	2/24	0.302391	0.710514	1.89162	2.26245	RNF20;RNF40
porphyrin-containing compound biosynthetic process (GO:0006779)	2/24	0.302391	0.710514	1.89162	2.26245	FECH;COX10
positive regulation of lamellipodium assembly (GO:0010592)	2/24	0.302391	0.710514	1.89162	2.26245	ACTR2;NCKAP1
regulation of DNA recombination (GO:0000018)	3/42	0.303239	0.710514	1.60092	1.91028	RAD50;PPP4C;ALYREF
regulation of ubiquitin-dependent protein catabolic process (GO:2000058)	3/42	0.303239	0.710514	1.60092	1.91028	RPS7;RPL23;RPL11
translesion synthesis (GO:0019985)	3/42	0.303239	0.710514	1.60092	1.91028	RFC2;POLD1;UBA52
negative regulation of protein catabolic process (GO:0042177)	3/42	0.303239	0.710514	1.60092	1.91028	RGP1;PIN1;PHB
lipid biosynthetic process (GO:0008610)	5/80	0.305692	0.710514	1.38788	1.64488	ACLY;GGPS1;OXSM;FDXR;MCAT
positive regulation of macromolecule metabolic process (GO:0010604)	20/384	0.31221	0.710514	1.14528	1.3332	MED1;DDX3X;TFRC;RPS7;ROCK2;RPL23;RPL11;STAT3;CTCF;PHB;MAPK14;MTOR;HINFP;MED23;TRIM28;MYC;TADA3;RPS3;FAM98B;ZPR1
adenosine to inosine editing (GO:0006382)	1/8	0.313371	0.710514	2.97165	3.4482	ADAT2
regulation of apoptotic cell clearance (GO:2000425)	1/8	0.313371	0.710514	2.97165	3.4482	HMGB1
regulation of cardiac muscle cell action potential involved in regulation of contraction (GO:0098909)	1/8	0.313371	0.710514	2.97165	3.4482	RANGRF
regulation of chemokine (C-C motif) ligand 5 production (GO:0071649)	1/8	0.313371	0.710514	2.97165	3.4482	DDX3X
regulation of dendritic cell chemotaxis (GO:2000508)	1/8	0.313371	0.710514	2.97165	3.4482	C1QBP
regulation of extent of cell growth (GO:0061387)	1/8	0.313371	0.710514	2.97165	3.4482	DNM2
cellular response to interleukin-21 (GO:0098757)	1/8	0.313371	0.710514	2.97165	3.4482	STAT3
regulation of intrinsic apoptotic signaling pathway by p53 class mediator (GO:1902253)	1/8	0.313371	0.710514	2.97165	3.4482	RPS7
regulation of metaphase/anaphase transition of cell cycle (GO:1902099)	1/8	0.313371	0.710514	2.97165	3.4482	PLK1
regulation of myeloid leukocyte differentiation (GO:0002761)	1/8	0.313371	0.710514	2.97165	3.4482	MTOR
DNA damage induced protein phosphorylation (GO:0006975)	1/8	0.313371	0.710514	2.97165	3.4482	MAP2K6
regulation of nitrogen compound metabolic process (GO:0051171)	1/8	0.313371	0.710514	2.97165	3.4482	ROCK2
regulation of protein K63-linked ubiquitination (GO:1900044)	1/8	0.313371	0.710514	2.97165	3.4482	DDX3X
regulation of protein localization to cell cortex (GO:1904776)	1/8	0.313371	0.710514	2.97165	3.4482	PLK1
regulation of protein localization to early endosome (GO:1902965)	1/8	0.313371	0.710514	2.97165	3.4482	ROCK2
regulation of proton transport (GO:0010155)	1/8	0.313371	0.710514	2.97165	3.4482	PHB2
regulation of translational termination (GO:0006449)	1/8	0.313371	0.710514	2.97165	3.4482	ETF1
regulation of wound healing, spreading of epidermal cells (GO:1903689)	1/8	0.313371	0.710514	2.97165	3.4482	MTOR
RNA secondary structure unwinding (GO:0010501)	1/8	0.313371	0.710514	2.97165	3.4482	DDX3X
interleukin-21-mediated signaling pathway (GO:0038114)	1/8	0.313371	0.710514	2.97165	3.4482	STAT3
isoprenoid metabolic process (GO:0006720)	1/8	0.313371	0.710514	2.97165	3.4482	GGPS1
spermidine metabolic process (GO:0008216)	1/8	0.313371	0.710514	2.97165	3.4482	DHPS
stress-induced premature senescence (GO:0090400)	1/8	0.313371	0.710514	2.97165	3.4482	MAPK14
synaptic vesicle budding (GO:0070142)	1/8	0.313371	0.710514	2.97165	3.4482	DNM2
T-helper cell lineage commitment (GO:0002295)	1/8	0.313371	0.710514	2.97165	3.4482	STAT3
tRNA transcription (GO:0009304)	1/8	0.313371	0.710514	2.97165	3.4482	GTF3C4
mitophagy (GO:0000423)	1/8	0.313371	0.710514	2.97165	3.4482	PHB2
vascular associated smooth muscle contraction (GO:0014829)	1/8	0.313371	0.710514	2.97165	3.4482	PIK3C2A
mitotic spindle elongation (GO:0000022)	1/8	0.313371	0.710514	2.97165	3.4482	RACGAP1
mitotic spindle midzone assembly (GO:0051256)	1/8	0.313371	0.710514	2.97165	3.4482	RACGAP1
negative regulation of B cell apoptotic process (GO:0002903)	1/8	0.313371	0.710514	2.97165	3.4482	BCL10
negative regulation of calcium ion import (GO:0090281)	1/8	0.313371	0.710514	2.97165	3.4482	VDAC1
negative regulation of keratinocyte proliferation (GO:0010839)	1/8	0.313371	0.710514	2.97165	3.4482	MED1
negative regulation of mitochondrial fusion (GO:0010637)	1/8	0.313371	0.710514	2.97165	3.4482	TFRC
negative regulation of mitochondrial membrane potential (GO:0010917)	1/8	0.313371	0.710514	2.97165	3.4482	PRELID1
negative regulation of muscle cell differentiation (GO:0051148)	1/8	0.313371	0.710514	2.97165	3.4482	PTBP1
negative regulation of nitrogen compound metabolic process (GO:0051172)	1/8	0.313371	0.710514	2.97165	3.4482	CLTC
phosphatidylinositol-3-phosphate biosynthetic process (GO:0036092)	1/8	0.313371	0.710514	2.97165	3.4482	PIK3C2A
platelet activating factor metabolic process (GO:0046469)	1/8	0.313371	0.710514	2.97165	3.4482	PAFAH1B1
positive regulation of Arp2/3 complex-mediated actin nucleation (GO:2000601)	1/8	0.313371	0.710514	2.97165	3.4482	NCKAP1
positive regulation of aspartic-type peptidase activity (GO:1905247)	1/8	0.313371	0.710514	2.97165	3.4482	ROCK2
positive regulation of chromosome segregation (GO:0051984)	1/8	0.313371	0.710514	2.97165	3.4482	SMC6
positive regulation of dendritic cell chemotaxis (GO:2000510)	1/8	0.313371	0.710514	2.97165	3.4482	C1QBP
positive regulation of isomerase activity (GO:0010912)	1/8	0.313371	0.710514	2.97165	3.4482	HNRNPU
positive regulation of leukocyte differentiation (GO:1902107)	1/8	0.313371	0.710514	2.97165	3.4482	HMGB1
positive regulation of myotube differentiation (GO:0010831)	1/8	0.313371	0.710514	2.97165	3.4482	MAPK14
positive regulation of protein localization to early endosome (GO:1902966)	1/8	0.313371	0.710514	2.97165	3.4482	ROCK2
positive regulation of protein localization to endosome (GO:1905668)	1/8	0.313371	0.710514	2.97165	3.4482	ROCK2
progesterone receptor signaling pathway (GO:0050847)	1/8	0.313371	0.710514	2.97165	3.4482	PHB
protein localization to microtubule cytoskeleton (GO:0072698)	1/8	0.313371	0.710514	2.97165	3.4482	MAPRE1
DNA synthesis involved in DNA repair (GO:0000731)	3/43	0.315963	0.714264	1.56082	1.79827	RFC2;POLD1;UBA52
DNA-dependent DNA replication maintenance of fidelity (GO:0045005)	3/43	0.315963	0.714264	1.56082	1.79827	CDK9;POLD1;ALYREF
regulation of cellular macromolecule biosynthetic process (GO:2000112)	24/468	0.316758	0.714264	1.12691	1.29552	RNF20;PRMT5;TRRAP;DAPK3;STAT3;PHB;SMC3;CDK11B;RPL6;HINFP;UBE2L3;DNM2;MED23;ORC5;DRAP1;CCNA2;SBNO1;MYBBP1A;ORC3;MYBL2;VHL;SRSF10;EIF4E;METAP1
I-kappaB kinase/NF-kappaB signaling (GO:0007249)	4/62	0.317334	0.714264	1.43545	1.64761	CHUK;ROCK2;BCL10;UBA52
modification-dependent protein catabolic process (GO:0019941)	11/201	0.31834	0.714264	1.2059	1.38031	RNF20;PTTG1;PLK1;PSMC2;LONP1;ARIH1;BUB3;UBA52;RNF40;UBE2L3;AURKA
positive regulation of cell cycle process (GO:0090068)	6/101	0.318726	0.714264	1.31489	1.50347	FEN1;DBF4;RACGAP1;CDC7;ECT2;AURKA
receptor catabolic process (GO:0032801)	2/25	0.319562	0.714264	1.80928	2.06404	CLTC;AP2S1
regulation of epidermal cell differentiation (GO:0045604)	2/25	0.319562	0.714264	1.80928	2.06404	CBFB;ROCK2
regulation of mitochondrial fission (GO:0090140)	2/25	0.319562	0.714264	1.80928	2.06404	DNM1L;AURKA
regulation of neutrophil chemotaxis (GO:0090022)	2/25	0.319562	0.714264	1.80928	2.06404	C1QBP;DNM1L
regulation of spindle assembly (GO:0090169)	2/25	0.319562	0.714264	1.80928	2.06404	PLK1;HNRNPU
in utero embryonic development (GO:0001701)	2/25	0.319562	0.714264	1.80928	2.06404	STIL;HINFP
organophosphate ester transport (GO:0015748)	2/25	0.319562	0.714264	1.80928	2.06404	PRELID1;TRIAP1
phosphatidylglycerol metabolic process (GO:0046471)	2/25	0.319562	0.714264	1.80928	2.06404	PGS1;CRLS1
positive regulation of peptidyl-threonine phosphorylation (GO:0010800)	2/25	0.319562	0.714264	1.80928	2.06404	RPTOR;PLK1
positive regulation of release of cytochrome c from mitochondria (GO:0090200)	2/25	0.319562	0.714264	1.80928	2.06404	BCL2L11;DNM1L
membrane organization (GO:0061024)	13/242	0.320145	0.714933	1.18261	1.34697	MTCH1;ACTR2;TFRC;COX18;CLTC;PIK3C2A;ACTB;TIMM50;DNM2;OPA1;AP2S1;DNM1L;UBA52
post-translational protein modification (GO:0043687)	18/345	0.321806	0.718007	1.14709	1.30058	MBTPS1;CUL2;PSMA5;PSMA6;PSMC5;COPS6;PSMA4;COPS5;RBBP5;PSMD2;PSMC1;PSMC2;UBA3;WDR5;NAE1;VHL;SKP2;DCAF13
positive regulation of protein ubiquitination (GO:0031398)	5/82	0.323884	0.722004	1.35169	1.52385	PLK1;PIN1;BCL10;RPS2;UBE2L3
regulation of proteasomal ubiquitin-dependent protein catabolic process (GO:0032434)	6/102	0.326885	0.724606	1.30112	1.45485	HECTD1;PLK1;SUMO2;RPL11;ARIH1;OGT
cellular response to reactive oxygen species (GO:0034614)	4/63	0.327845	0.724606	1.41104	1.57362	CHUK;RPS3;ROMO1;ECT2
monocarboxylic acid biosynthetic process (GO:0072330)	4/63	0.327845	0.724606	1.41104	1.57362	ACLY;OXSM;HSD17B10;MCAT
hexose biosynthetic process (GO:0019319)	3/44	0.328696	0.724606	1.52267	1.69416	TPI1;PGAM1;GAPDH
homotypic cell-cell adhesion (GO:0034109)	3/44	0.328696	0.724606	1.52267	1.69416	MYH9;ACTB;METAP1
cellular response to drug (GO:0035690)	2/26	0.336627	0.724606	1.73381	1.88773	TFRC;MYC
chaperone cofactor-dependent protein refolding (GO:0051085)	2/26	0.336627	0.724606	1.73381	1.88773	HSPA9;HSPE1
clathrin-dependent endocytosis (GO:0072583)	2/26	0.336627	0.724606	1.73381	1.88773	CLTC;AP2S1
glial cell development (GO:0021782)	2/26	0.336627	0.724606	1.73381	1.88773	EIF2B2;EIF2B1
snRNA processing (GO:0016180)	2/26	0.336627	0.724606	1.73381	1.88773	TOE1;INTS2
meiosis I (GO:0007127)	2/26	0.336627	0.724606	1.73381	1.88773	BCL2L11;PTTG1
TOR signaling (GO:0031929)	2/26	0.336627	0.724606	1.73381	1.88773	RPTOR;MTOR
negative regulation of intrinsic apoptotic signaling pathway in response to DNA damage (GO:1902230)	2/26	0.336627	0.724606	1.73381	1.88773	TRIAP1;TPT1
negative regulation of macroautophagy (GO:0016242)	2/26	0.336627	0.724606	1.73381	1.88773	USP36;MTOR
positive regulation of microtubule polymerization or depolymerization (GO:0031112)	2/26	0.336627	0.724606	1.73381	1.88773	RPS3;MAPRE1
negative regulation of intrinsic apoptotic signaling pathway (GO:2001243)	4/64	0.338376	0.724606	1.38745	1.50344	NDUFA13;DDX3X;OPA1;TPT1
regulation of DNA repair (GO:0006282)	3/45	0.341424	0.724606	1.48634	1.59726	CDK9;TRIM28;RPS3
regulation of pri-miRNA transcription by RNA polymerase II (GO:1902893)	3/45	0.341424	0.724606	1.48634	1.59726	FOSL1;STAT3;GNL3
protein deacetylation (GO:0006476)	3/45	0.341424	0.724606	1.48634	1.59726	SIN3B;PHB;MTA2
protein-containing complex assembly (GO:0065003)	14/267	0.343166	0.724606	1.15257	1.23272	CDC123;KMT2A;NIFK;TRRAP;SLC2A1;SAMM50;KAT5;OPA1;RBBP5;MYC;ZNHIT6;CSNK2B;DNM1L;MDN1
purine nucleobase metabolic process (GO:0006144)	1/9	0.3449	0.724606	2.60005	2.76776	GMPS
androgen biosynthetic process (GO:0006702)	1/9	0.3449	0.724606	2.60005	2.76776	MED1
anoikis (GO:0043276)	1/9	0.3449	0.724606	2.60005	2.76776	MTOR
ATF6-mediated unfolded protein response (GO:0036500)	1/9	0.3449	0.724606	2.60005	2.76776	MBTPS1
regulation of aspartic-type endopeptidase activity involved in amyloid precursor protein catabolic process (GO:1902959)	1/9	0.3449	0.724606	2.60005	2.76776	ROCK2
axon regeneration (GO:0031103)	1/9	0.3449	0.724606	2.60005	2.76776	DHFR
bone cell development (GO:0098751)	1/9	0.3449	0.724606	2.60005	2.76776	MED1
regulation of cellular response to oxidative stress (GO:1900407)	1/9	0.3449	0.724606	2.60005	2.76776	DHFR
regulation of endothelial cell development (GO:1901550)	1/9	0.3449	0.724606	2.60005	2.76776	ROCK2
regulation of fibroblast apoptotic process (GO:2000269)	1/9	0.3449	0.724606	2.60005	2.76776	BCL2L11
cellular response to interleukin-9 (GO:0071355)	1/9	0.3449	0.724606	2.60005	2.76776	STAT3
cellular response to leptin stimulus (GO:0044320)	1/9	0.3449	0.724606	2.60005	2.76776	STAT3
regulation of helicase activity (GO:0051095)	1/9	0.3449	0.724606	2.60005	2.76776	SSBP1
cytolysis by host of symbiont cells (GO:0051838)	1/9	0.3449	0.724606	2.60005	2.76776	ROMO1
cytolysis in other organism involved in symbiotic interaction (GO:0051801)	1/9	0.3449	0.724606	2.60005	2.76776	ROMO1
regulation of mitotic centrosome separation (GO:0046602)	1/9	0.3449	0.724606	2.60005	2.76776	KIF11
embryonic digestive tract morphogenesis (GO:0048557)	1/9	0.3449	0.724606	2.60005	2.76776	NIPBL
embryonic forelimb morphogenesis (GO:0035115)	1/9	0.3449	0.724606	2.60005	2.76776	NIPBL
regulation of skeletal muscle cell differentiation (GO:2001014)	1/9	0.3449	0.724606	2.60005	2.76776	UQCC2
regulation of sterol biosynthetic process (GO:0106118)	1/9	0.3449	0.724606	2.60005	2.76776	MBTPS1
fructose 1,6-bisphosphate metabolic process (GO:0030388)	1/9	0.3449	0.724606	2.60005	2.76776	PFKL
regulation of transmembrane transporter activity (GO:0022898)	1/9	0.3449	0.724606	2.60005	2.76776	ACTB
glycerolipid biosynthetic process (GO:0045017)	1/9	0.3449	0.724606	2.60005	2.76776	CRLS1
histone phosphorylation (GO:0016572)	1/9	0.3449	0.724606	2.60005	2.76776	CCNA2
interleukin-23-mediated signaling pathway (GO:0038155)	1/9	0.3449	0.724606	2.60005	2.76776	STAT3
interleukin-9-mediated signaling pathway (GO:0038113)	1/9	0.3449	0.724606	2.60005	2.76776	STAT3
sensory organ morphogenesis (GO:0090596)	1/9	0.3449	0.724606	2.60005	2.76776	NIPBL
short-chain fatty acid metabolic process (GO:0046459)	1/9	0.3449	0.724606	2.60005	2.76776	OXSM
isoprenoid biosynthetic process (GO:0008299)	1/9	0.3449	0.724606	2.60005	2.76776	GGPS1
ketone biosynthetic process (GO:0042181)	1/9	0.3449	0.724606	2.60005	2.76776	TPI1
kinetochore assembly (GO:0051382)	1/9	0.3449	0.724606	2.60005	2.76776	CENPW
L-ascorbic acid metabolic process (GO:0019852)	1/9	0.3449	0.724606	2.60005	2.76776	SLC2A1
maintenance of apical/basal cell polarity (GO:0035090)	1/9	0.3449	0.724606	2.60005	2.76776	WDR1
maintenance of epithelial cell apical/basal polarity (GO:0045199)	1/9	0.3449	0.724606	2.60005	2.76776	WDR1
T-helper 1 type immune response (GO:0042088)	1/9	0.3449	0.724606	2.60005	2.76776	HMGB1
tetrahydrofolate interconversion (GO:0035999)	1/9	0.3449	0.724606	2.60005	2.76776	TYMS
mitochondrial fragmentation involved in apoptotic process (GO:0043653)	1/9	0.3449	0.724606	2.60005	2.76776	DNM1L
negative regulation of biomineralization (GO:0110150)	1/9	0.3449	0.724606	2.60005	2.76776	ROCK2
negative regulation of membrane potential (GO:0045837)	1/9	0.3449	0.724606	2.60005	2.76776	PRELID1
negative regulation of nitric oxide biosynthetic process (GO:0045019)	1/9	0.3449	0.724606	2.60005	2.76776	ROCK2
negative regulation of nitric oxide metabolic process (GO:1904406)	1/9	0.3449	0.724606	2.60005	2.76776	ROCK2
neuronal ion channel clustering (GO:0045161)	1/9	0.3449	0.724606	2.60005	2.76776	MTCH1
peptidyl-cysteine modification (GO:0018198)	1/9	0.3449	0.724606	2.60005	2.76776	CHCHD4
peroxisome fission (GO:0016559)	1/9	0.3449	0.724606	2.60005	2.76776	DNM1L
positive regulation of B cell differentiation (GO:0045579)	1/9	0.3449	0.724606	2.60005	2.76776	PPP2R3C
positive regulation of CD8-positive, alpha-beta T cell activation (GO:2001187)	1/9	0.3449	0.724606	2.60005	2.76776	CBFB
positive regulation of cell-cell adhesion mediated by cadherin (GO:2000049)	1/9	0.3449	0.724606	2.60005	2.76776	FOXA2
positive regulation of protein polyubiquitination (GO:1902916)	1/9	0.3449	0.724606	2.60005	2.76776	DDX3X
protein hexamerization (GO:0034214)	1/9	0.3449	0.724606	2.60005	2.76776	LETM1
regulation of RNA metabolic process (GO:0051252)	4/65	0.348918	0.732436	1.36464	1.43685	USP36;PTBP1;MED1;HNRNPF
cellular response to oxidative stress (GO:0034599)	7/125	0.350429	0.73451	1.23489	1.2949	PNPT1;CHUK;PYROXD1;LONP1;RPS3;CYCS;ROMO1
regulation of cell junction assembly (GO:1901888)	2/27	0.353561	0.73451	1.66437	1.73044	CBFB;ROCK2
release of sequestered calcium ion into cytosol (GO:0051209)	2/27	0.353561	0.73451	1.66437	1.73044	LETM1;CHERP
stress-activated protein kinase signaling cascade (GO:0031098)	2/27	0.353561	0.73451	1.66437	1.73044	CHUK;UBA52
microtubule polymerization or depolymerization (GO:0031109)	2/27	0.353561	0.73451	1.66437	1.73044	KIF18B;PIN1
negative regulation of protein polymerization (GO:0032272)	2/27	0.353561	0.73451	1.66437	1.73044	TBCD;MAPRE1
peptidyl-lysine methylation (GO:0018022)	2/27	0.353561	0.73451	1.66437	1.73044	N6AMT1;TRMT112
positive regulation of cellular component movement (GO:0051272)	2/27	0.353561	0.73451	1.66437	1.73044	RPS19;CFAP20
positive regulation of gene silencing by miRNA (GO:2000637)	2/27	0.353561	0.73451	1.66437	1.73044	EIF4ENIF1;STAT3
positive regulation of toll-like receptor signaling pathway (GO:0034123)	2/27	0.353561	0.73451	1.66437	1.73044	DDX3X;HMGB1
protein export from nucleus (GO:0006611)	2/27	0.353561	0.73451	1.66437	1.73044	NUP214;NUTF2
regulation of double-strand break repair via homologous recombination (GO:0010569)	3/46	0.354133	0.73451	1.4517	1.50698	ACTR2;PPP4C;MMS19
erythrocyte differentiation (GO:0030218)	3/46	0.354133	0.73451	1.4517	1.50698	HSPA9;MED1;RPS19
postreplication repair (GO:0006301)	3/46	0.354133	0.73451	1.4517	1.50698	RFC2;POLD1;UBA52
cellular response to nutrient levels (GO:0031669)	4/66	0.359463	0.73451	1.34256	1.37363	RPTOR;RRAGA;RRAGC;MTOR
chromosome organization (GO:0051276)	6/106	0.359755	0.73451	1.24882	1.27671	COPS6;COPS5;CENPW;MYC;HMGN2;UBA52
peptidyl-lysine modification (GO:0018205)	6/106	0.359755	0.73451	1.24882	1.27671	NUP214;SEH1L;KAT5;TRIM28;SUMO2;SAE1
positive regulation of endothelial cell migration (GO:0010595)	5/86	0.360563	0.73451	1.28467	1.31047	PDPK1;ROCK2;HMGB1;MAPK14;AAMP
regulation of cellular metabolic process (GO:0031323)	3/47	0.366811	0.73451	1.41863	1.42276	ACLY;EIF6;LAMTOR1
regulation of protein localization to nucleus (GO:1900180)	3/47	0.366811	0.73451	1.41863	1.42276	TFRC;PLK1;PIN1
epidermal growth factor receptor signaling pathway (GO:0007173)	3/47	0.366811	0.73451	1.41863	1.42276	PDPK1;PIK3C2A;AAMP
histone deacetylation (GO:0016575)	3/47	0.366811	0.73451	1.41863	1.42276	SIN3B;PHB;MTA2
vascular endothelial growth factor receptor signaling pathway (GO:0048010)	4/67	0.370004	0.73451	1.32118	1.31357	NCKAP1;ROCK2;MAPK14;AAMP
regulation of calcineurin-NFAT signaling cascade (GO:0070884)	2/28	0.37034	0.73451	1.60027	1.5896	PTBP1;CHERP
cellular response to interleukin-6 (GO:0071354)	2/28	0.37034	0.73451	1.60027	1.5896	STAT3;PHB
regulation of immunoglobulin production (GO:0002637)	2/28	0.37034	0.73451	1.60027	1.5896	PHB;PHB2
regulation of microtubule polymerization or depolymerization (GO:0031110)	2/28	0.37034	0.73451	1.60027	1.5896	MAPRE1;SKA2
regulation of multicellular organismal development (GO:2000026)	2/28	0.37034	0.73451	1.60027	1.5896	NIPBL;RACGAP1
response to interferon-beta (GO:0035456)	2/28	0.37034	0.73451	1.60027	1.5896	NDUFA13;PNPT1
sulfur compound transport (GO:0072348)	2/28	0.37034	0.73451	1.60027	1.5896	SLC25A26;RACGAP1
phagosome acidification (GO:0090383)	2/28	0.37034	0.73451	1.60027	1.5896	ATP6V1G1;ATP6V1E1
positive regulation of microtubule polymerization (GO:0031116)	2/28	0.37034	0.73451	1.60027	1.5896	RPS3;MAPRE1
protein depolymerization (GO:0051261)	2/28	0.37034	0.73451	1.60027	1.5896	KIF18B;WDR1
peptidyl-serine modification (GO:0018209)	9/169	0.372583	0.73451	1.17092	1.15604	CHUK;PDPK1;ROCK2;PLK1;VRK1;CDC7;MAPK14;MTOR;AURKA
acetyl-CoA biosynthetic process (GO:0006085)	1/10	0.374982	0.73451	2.31104	2.26684	ACLY
apical protein localization (GO:0045176)	1/10	0.374982	0.73451	2.31104	2.26684	ACTB
B cell homeostasis (GO:0001782)	1/10	0.374982	0.73451	2.31104	2.26684	PPP2R3C
regulation of carbohydrate biosynthetic process (GO:0043255)	1/10	0.374982	0.73451	2.31104	2.26684	OGT
cellular response to acetylcholine (GO:1905145)	1/10	0.374982	0.73451	2.31104	2.26684	ROCK2
cellular response to leucine starvation (GO:1990253)	1/10	0.374982	0.73451	2.31104	2.26684	MTOR
regulation of hair cycle (GO:0042634)	1/10	0.374982	0.73451	2.31104	2.26684	NIPBL
cellular response to oxygen levels (GO:0071453)	1/10	0.374982	0.73451	2.31104	2.26684	ATP6V1G1
regulation of histone phosphorylation (GO:0033127)	1/10	0.374982	0.73451	2.31104	2.26684	CDK9
regulation of microtubule nucleation (GO:0010968)	1/10	0.374982	0.73451	2.31104	2.26684	RANGRF
DNA damage response, signal transduction by p53 class mediator resulting in transcription of p21 class mediator (GO:0006978)	1/10	0.374982	0.73451	2.31104	2.26684	KAT5
DNA dealkylation (GO:0035510)	1/10	0.374982	0.73451	2.31104	2.26684	FTO
DNA dealkylation involved in DNA repair (GO:0006307)	1/10	0.374982	0.73451	2.31104	2.26684	FTO
DNA replication-dependent nucleosome assembly (GO:0006335)	1/10	0.374982	0.73451	2.31104	2.26684	CHAF1B
DNA replication-dependent nucleosome organization (GO:0034723)	1/10	0.374982	0.73451	2.31104	2.26684	CHAF1B
dosage compensation (GO:0007549)	1/10	0.374982	0.73451	2.31104	2.26684	HNRNPU
regulation of phospholipid metabolic process (GO:1903725)	1/10	0.374982	0.73451	2.31104	2.26684	PHB2
endothelial tube morphogenesis (GO:0061154)	1/10	0.374982	0.73451	2.31104	2.26684	CSNK2B
regulation of protein neddylation (GO:2000434)	1/10	0.374982	0.73451	2.31104	2.26684	RPL11
forelimb morphogenesis (GO:0035136)	1/10	0.374982	0.73451	2.31104	2.26684	NIPBL
genetic imprinting (GO:0071514)	1/10	0.374982	0.73451	2.31104	2.26684	CTCF
histone H3-K36 demethylation (GO:0070544)	1/10	0.374982	0.73451	2.31104	2.26684	KDM8
retinoic acid receptor signaling pathway (GO:0048384)	1/10	0.374982	0.73451	2.31104	2.26684	SNW1
I-kappaB phosphorylation (GO:0007252)	1/10	0.374982	0.73451	2.31104	2.26684	CHUK
leptin-mediated signaling pathway (GO:0033210)	1/10	0.374982	0.73451	2.31104	2.26684	STAT3
long-chain fatty acid import into cell (GO:0044539)	1/10	0.374982	0.73451	2.31104	2.26684	SLC2A1
UV protection (GO:0009650)	1/10	0.374982	0.73451	2.31104	2.26684	FEN1
mitotic DNA replication checkpoint signaling (GO:0033314)	1/10	0.374982	0.73451	2.31104	2.26684	NAE1
modification-dependent macromolecule catabolic process (GO:0043632)	1/10	0.374982	0.73451	2.31104	2.26684	UBA52
modulation by symbiont of host process (GO:0044003)	1/10	0.374982	0.73451	2.31104	2.26684	UBA52
muscle cell migration (GO:0014812)	1/10	0.374982	0.73451	2.31104	2.26684	AAMP
negative regulation of cellular protein catabolic process (GO:1903363)	1/10	0.374982	0.73451	2.31104	2.26684	RGP1
negative regulation of interferon-beta production (GO:0032688)	1/10	0.374982	0.73451	2.31104	2.26684	CACTIN
negative regulation of lipopolysaccharide-mediated signaling pathway (GO:0031665)	1/10	0.374982	0.73451	2.31104	2.26684	CACTIN
negative regulation of peptidyl-lysine acetylation (GO:2000757)	1/10	0.374982	0.73451	2.31104	2.26684	SET
negative regulation of transcription by competitive promoter binding (GO:0010944)	1/10	0.374982	0.73451	2.31104	2.26684	PHB
negative regulation of transcription from RNA polymerase II promoter in response to stress (GO:0097201)	1/10	0.374982	0.73451	2.31104	2.26684	VHL
negative regulation of viral-induced cytoplasmic pattern recognition receptor signaling pathway (GO:0039532)	1/10	0.374982	0.73451	2.31104	2.26684	C1QBP
neuron projection regeneration (GO:0031102)	1/10	0.374982	0.73451	2.31104	2.26684	DHFR
peptidyl-amino acid modification (GO:0018193)	1/10	0.374982	0.73451	2.31104	2.26684	METAP1
peptidyl-lysine acetylation (GO:0018394)	1/10	0.374982	0.73451	2.31104	2.26684	KAT5
positive regulation of behavior (GO:0048520)	1/10	0.374982	0.73451	2.31104	2.26684	CFAP20
positive regulation of keratinocyte migration (GO:0051549)	1/10	0.374982	0.73451	2.31104	2.26684	MTOR
positive regulation of lipase activity (GO:0060193)	1/10	0.374982	0.73451	2.31104	2.26684	PDPK1
positive regulation of mesenchymal cell proliferation (GO:0002053)	1/10	0.374982	0.73451	2.31104	2.26684	MYC
positive regulation of myoblast fusion (GO:1901741)	1/10	0.374982	0.73451	2.31104	2.26684	MAPK14
positive regulation of T cell apoptotic process (GO:0070234)	1/10	0.374982	0.73451	2.31104	2.26684	PRELID1
positive regulation of tissue remodeling (GO:0034105)	1/10	0.374982	0.73451	2.31104	2.26684	ROCK2
positive regulation of transcription of nucleolar large rRNA by RNA polymerase I (GO:1901838)	1/10	0.374982	0.73451	2.31104	2.26684	MTOR
primary miRNA processing (GO:0031053)	1/10	0.374982	0.73451	2.31104	2.26684	MRPL44
production of siRNA involved in RNA interference (GO:0030422)	1/10	0.374982	0.73451	2.31104	2.26684	MRPL44
protein K11-linked deubiquitination (GO:0035871)	1/10	0.374982	0.73451	2.31104	2.26684	USP30
negative regulation of binding (GO:0051100)	5/88	0.378963	0.741521	1.25358	1.21637	BTAF1;PIN1;ACTB;GTPBP4;AURKA
regulation of interleukin-10 production (GO:0032653)	3/48	0.379445	0.741521	1.38703	1.3441	STAT3;HMGB1;HSPD1
positive regulation of DNA repair (GO:0045739)	3/48	0.379445	0.741521	1.38703	1.3441	TRIM28;RPS3;HMGB1
regulation of protein ubiquitination (GO:0031396)	6/109	0.384541	0.750899	1.21225	1.15855	U2AF2;RPS3;BCL10;OGT;GTPBP4;UBE2L3
establishment of mitotic spindle localization (GO:0040001)	2/29	0.386943	0.75209	1.54092	1.46307	PLK1;PAFAH1B1
intrinsic apoptotic signaling pathway in response to endoplasmic reticulum stress (GO:0070059)	2/29	0.386943	0.75209	1.54092	1.46307	AIFM1;BAK1
MyD88-dependent toll-like receptor signaling pathway (GO:0002755)	2/29	0.386943	0.75209	1.54092	1.46307	UBA52;HSPD1
negative regulation of interferon-gamma production (GO:0032689)	2/29	0.386943	0.75209	1.54092	1.46307	C1QBP;HMGB1
positive regulation of dephosphorylation (GO:0035306)	2/29	0.386943	0.75209	1.54092	1.46307	PTBP1;PIN1
positive regulation of viral genome replication (GO:0045070)	2/29	0.386943	0.75209	1.54092	1.46307	DDX3X;PABPC1
regulation of type I interferon production (GO:0032479)	5/89	0.38816	0.753873	1.23859	1.17213	DHX33;POLR3F;PIN1;GAPDH;POLR2K
receptor internalization (GO:0031623)	3/49	0.392023	0.756046	1.35681	1.27056	TFRC;CLTC;DNM2
regulation of interferon-beta production (GO:0032648)	3/49	0.392023	0.756046	1.35681	1.27056	DDX3X;POLR3F;CACTIN
response to glucose (GO:0009749)	3/49	0.392023	0.756046	1.35681	1.27056	PFKL;EIF2B2;EIF2B1
cellular response to tumor necrosis factor (GO:0071356)	10/194	0.399606	0.756046	1.13113	1.03756	PSMA5;PSMA6;PSMC5;PSMA4;CHUK;PSMD2;PSMC1;PSMC2;RPS3;CACTIN
establishment of spindle orientation (GO:0051294)	2/30	0.40335	0.756046	1.48581	1.34904	PLK1;PAFAH1B1
regulation of type I interferon-mediated signaling pathway (GO:0060338)	2/30	0.40335	0.756046	1.48581	1.34904	ABCE1;CACTIN
TRIF-dependent toll-like receptor signaling pathway (GO:0035666)	2/30	0.40335	0.756046	1.48581	1.34904	CHUK;UBA52
microtubule polymerization (GO:0046785)	2/30	0.40335	0.756046	1.48581	1.34904	TPX2;PIN1
negative regulation of gene expression, epigenetic (GO:0045814)	2/30	0.40335	0.756046	1.48581	1.34904	SUZ12;EED
primary neural tube formation (GO:0014020)	2/30	0.40335	0.756046	1.48581	1.34904	STIL;BCL10
actin filament depolymerization (GO:0030042)	1/11	0.403685	0.756046	2.07983	1.88665	WDR1
protein oxidation (GO:0018158)	1/11	0.403685	0.756046	2.07983	1.88665	CHCHD4
protein polyglutamylation (GO:0018095)	1/11	0.403685	0.756046	2.07983	1.88665	CFAP20
rDNA heterochromatin assembly (GO:0000183)	1/11	0.403685	0.756046	2.07983	1.88665	MBD2
axonal transport of mitochondrion (GO:0019896)	1/11	0.403685	0.756046	2.07983	1.88665	OPA1
regulation of coagulation (GO:0050818)	1/11	0.403685	0.756046	2.07983	1.88665	FOXA2
cellular response to increased oxygen levels (GO:0036295)	1/11	0.403685	0.756046	2.07983	1.88665	ATP6V1G1
regulation of histone H3-K9 acetylation (GO:2000615)	1/11	0.403685	0.756046	2.07983	1.88665	KMT2A
copper ion transport (GO:0006825)	1/11	0.403685	0.756046	2.07983	1.88665	COX17
regulation of mesenchymal cell proliferation (GO:0010464)	1/11	0.403685	0.756046	2.07983	1.88665	MYC
regulation of mitochondrial fusion (GO:0010635)	1/11	0.403685	0.756046	2.07983	1.88665	TFRC
regulation of mRNA 3'-end processing (GO:0031440)	1/11	0.403685	0.756046	2.07983	1.88665	NCBP1
DNA damage response, signal transduction resulting in transcription (GO:0042772)	1/11	0.403685	0.756046	2.07983	1.88665	KAT5
regulation of phospholipase activity (GO:0010517)	1/11	0.403685	0.756046	2.07983	1.88665	PDPK1
erythrocyte development (GO:0048821)	1/11	0.403685	0.756046	2.07983	1.88665	MED1
fatty acid homeostasis (GO:0055089)	1/11	0.403685	0.756046	2.07983	1.88665	POLD1
regulation of T cell apoptotic process (GO:0070232)	1/11	0.403685	0.756046	2.07983	1.88665	PRELID1
regulation of T cell mediated immunity (GO:0002709)	1/11	0.403685	0.756046	2.07983	1.88665	HMGB1
regulation of toll-like receptor 9 signaling pathway (GO:0034163)	1/11	0.403685	0.756046	2.07983	1.88665	HMGB1
glycerol metabolic process (GO:0006071)	1/11	0.403685	0.756046	2.07983	1.88665	TPI1
Golgi inheritance (GO:0048313)	1/11	0.403685	0.756046	2.07983	1.88665	VRK1
interleukin-35-mediated signaling pathway (GO:0070757)	1/11	0.403685	0.756046	2.07983	1.88665	STAT3
isotype switching (GO:0045190)	1/11	0.403685	0.756046	2.07983	1.88665	HSPD1
synaptic vesicle transport (GO:0048489)	1/11	0.403685	0.756046	2.07983	1.88665	DNM2
T cell homeostasis (GO:0043029)	1/11	0.403685	0.756046	2.07983	1.88665	PPP2R3C
tetrahydrobiopterin metabolic process (GO:0046146)	1/11	0.403685	0.756046	2.07983	1.88665	DHFR
miRNA mediated inhibition of translation (GO:0035278)	1/11	0.403685	0.756046	2.07983	1.88665	EIF6
vasoconstriction (GO:0042310)	1/11	0.403685	0.756046	2.07983	1.88665	PIK3C2A
monocyte differentiation (GO:0030224)	1/11	0.403685	0.756046	2.07983	1.88665	MYH9
negative regulation of calcium ion transmembrane transport (GO:1903170)	1/11	0.403685	0.756046	2.07983	1.88665	VDAC1
negative regulation of defense response to virus (GO:0050687)	1/11	0.403685	0.756046	2.07983	1.88665	C1QBP
negative regulation of receptor signaling pathway via STAT (GO:1904893)	1/11	0.403685	0.756046	2.07983	1.88665	VHL
negative regulation of translation, ncRNA-mediated (GO:0040033)	1/11	0.403685	0.756046	2.07983	1.88665	EIF6
positive regulation of actin nucleation (GO:0051127)	1/11	0.403685	0.756046	2.07983	1.88665	NCKAP1
positive regulation of cellular respiration (GO:1901857)	1/11	0.403685	0.756046	2.07983	1.88665	PRELID1
positive regulation of DNA methylation-dependent heterochromatin assembly (GO:0090309)	1/11	0.403685	0.756046	2.07983	1.88665	TRIM28
positive regulation of posttranscriptional gene silencing (GO:0060148)	1/11	0.403685	0.756046	2.07983	1.88665	STAT3
proteasome assembly (GO:0043248)	1/11	0.403685	0.756046	2.07983	1.88665	PSMG2
regulation of cellular component movement (GO:0051270)	3/50	0.404535	0.756514	1.32787	1.20174	RPS19;ROCK2;DAPK3
regulation of complement activation (GO:0030449)	3/50	0.404535	0.756514	1.32787	1.20174	C1QBP;PHB;PHB2
toll-like receptor signaling pathway (GO:0002224)	5/91	0.406522	0.759664	1.20966	1.08884	CHUK;HMGB1;BCL10;UBA52;HSPD1
protein-containing complex subunit organization (GO:0043933)	6/112	0.40933	0.764346	1.17776	1.05201	SEH1L;KMT2A;NIFK;SLC2A1;DNM1L;MDN1
defense response to virus (GO:0051607)	7/133	0.41091	0.766728	1.15599	1.02812	EXOSC4;TTC4;PHB;SKP2;ABCE1;PHB2;ATAD3A
regulation of lipid metabolic process (GO:0019216)	5/92	0.415677	0.769573	1.19569	1.04963	MED1;FDPS;SIN3B;GGPS1;HMGCS1
protein modification by small protein conjugation (GO:0032446)	20/409	0.41795	0.769573	1.07024	0.933675	NUP214;RNF20;SEH1L;MOCS3;URM1;PLK1;CUL2;WDR61;BCL10;RNF40;UBE2L3;RRAGA;TRIM28;SUMO2;UBA3;NAE1;ARIH1;VHL;SAE1;UBA52
positive regulation of NF-kappaB transcription factor activity (GO:0051092)	8/155	0.418759	0.769573	1.13239	0.985702	PSMA6;TFRC;DHX33;CHUK;STAT3;RPS3;BCL10;UBA52
activation of protein kinase B activity (GO:0032148)	2/31	0.419544	0.769573	1.4345	1.24599	PDPK1;MTOR
purine nucleoside bisphosphate metabolic process (GO:0034032)	2/31	0.419544	0.769573	1.4345	1.24599	ACLY;OXSM
regulation of cellular senescence (GO:2000772)	2/31	0.419544	0.769573	1.4345	1.24599	RSL1D1;PNPT1
regulation of developmental growth (GO:0048638)	2/31	0.419544	0.769573	1.4345	1.24599	NIPBL;DNM2
ribonucleoside bisphosphate metabolic process (GO:0033875)	2/31	0.419544	0.769573	1.4345	1.24599	ACLY;OXSM
steroid hormone biosynthetic process (GO:0120178)	2/31	0.419544	0.769573	1.4345	1.24599	MED1;FDXR
tube closure (GO:0060606)	2/31	0.419544	0.769573	1.4345	1.24599	STIL;BCL10
MyD88-independent toll-like receptor signaling pathway (GO:0002756)	2/31	0.419544	0.769573	1.4345	1.24599	CHUK;UBA52
negative regulation of proteasomal ubiquitin-dependent protein catabolic process (GO:0032435)	2/31	0.419544	0.769573	1.4345	1.24599	RPL11;OGT
negative regulation of response to biotic stimulus (GO:0002832)	2/31	0.419544	0.769573	1.4345	1.24599	C1QBP;CACTIN
negative regulation of response to DNA damage stimulus (GO:2001021)	2/31	0.419544	0.769573	1.4345	1.24599	RPS3;TPT1
positive regulation of mononuclear cell migration (GO:0071677)	2/31	0.419544	0.769573	1.4345	1.24599	C1QBP;HMGB1
positive regulation of proteolysis involved in cellular protein catabolic process (GO:1903052)	2/31	0.419544	0.769573	1.4345	1.24599	PSMC5;PSMC2
cytoskeleton-dependent cytokinesis (GO:0061640)	4/72	0.422388	0.769573	1.22371	1.05463	RACGAP1;ROCK2;PLK1;ECT2
extrinsic apoptotic signaling pathway (GO:0097191)	4/72	0.422388	0.769573	1.22371	1.05463	CASP9;DDX3X;PDPK1;BAK1
response to ionizing radiation (GO:0010212)	4/72	0.422388	0.769573	1.22371	1.05463	KAT5;MYC;ECT2;MAPK14
negative regulation of supramolecular fiber organization (GO:1902904)	4/72	0.422388	0.769573	1.22371	1.05463	TPX2;VBP1;TBCD;MAPRE1
cellular response to lipid (GO:0071396)	11/219	0.423612	0.769573	1.10049	0.945252	MED1;NDUFA13;SNW1;KAT5;ROCK2;RUVBL2;BCL10;HMGB1;CACTIN;MAPK14;UBE2L3
activation of protein kinase activity (GO:0032147)	6/114	0.425809	0.769573	1.15582	0.9868	TPX2;PDPK1;PHB;ECT2;PHB2;MTOR
myeloid cell differentiation (GO:0030099)	3/52	0.429321	0.769573	1.27354	1.07684	HSPA9;RPS19;KAT6A
negative regulation of protein metabolic process (GO:0051248)	3/52	0.429321	0.769573	1.27354	1.07684	VBP1;PIN1;PHB
protein homotetramerization (GO:0051289)	3/52	0.429321	0.769573	1.27354	1.07684	SSBP1;HSD17B10;THG1L
regulation of actin filament depolymerization (GO:0030834)	1/12	0.431071	0.769573	1.89065	1.59095	WDR1
regulation of alcohol biosynthetic process (GO:1902930)	1/12	0.431071	0.769573	1.89065	1.59095	MBTPS1
regulation of amyloid precursor protein catabolic process (GO:1902991)	1/12	0.431071	0.769573	1.89065	1.59095	ROCK2
attachment of mitotic spindle microtubules to kinetochore (GO:0051315)	1/12	0.431071	0.769573	1.89065	1.59095	SEH1L
autophagy of peroxisome (GO:0030242)	1/12	0.431071	0.769573	1.89065	1.59095	USP30
brain morphogenesis (GO:0048854)	1/12	0.431071	0.769573	1.89065	1.59095	PAFAH1B1
regulation of cholesterol esterification (GO:0010872)	1/12	0.431071	0.769573	1.89065	1.59095	LAMTOR1
regulation of chromatin binding (GO:0035561)	1/12	0.431071	0.769573	1.89065	1.59095	BTAF1
regulation of dendritic cell differentiation (GO:2001198)	1/12	0.431071	0.769573	1.89065	1.59095	HMGB1
regulation of DNA-dependent DNA replication (GO:0090329)	1/12	0.431071	0.769573	1.89065	1.59095	WDR18
cellular response to growth hormone stimulus (GO:0071378)	1/12	0.431071	0.769573	1.89065	1.59095	STAT3
regulation of hemopoiesis (GO:1903706)	1/12	0.431071	0.769573	1.89065	1.59095	CBFB
regulation of keratinocyte migration (GO:0051547)	1/12	0.431071	0.769573	1.89065	1.59095	MTOR
regulation of myoblast fusion (GO:1901739)	1/12	0.431071	0.769573	1.89065	1.59095	MAPK14
digestive system development (GO:0055123)	1/12	0.431071	0.769573	1.89065	1.59095	NIPBL
dosage compensation by inactivation of X chromosome (GO:0009048)	1/12	0.431071	0.769573	1.89065	1.59095	HNRNPU
regulation of RNA export from nucleus (GO:0046831)	1/12	0.431071	0.769573	1.89065	1.59095	NRDE2
ethanol oxidation (GO:0006069)	1/12	0.431071	0.769573	1.89065	1.59095	ADH7
eye photoreceptor cell differentiation (GO:0001754)	1/12	0.431071	0.769573	1.89065	1.59095	STAT3
gas transport (GO:0015669)	1/12	0.431071	0.769573	1.89065	1.59095	MYC
replicative senescence (GO:0090399)	1/12	0.431071	0.769573	1.89065	1.59095	ROMO1
megakaryocyte differentiation (GO:0030219)	1/12	0.431071	0.769573	1.89065	1.59095	MED1
tricarboxylic acid metabolic process (GO:0072350)	1/12	0.431071	0.769573	1.89065	1.59095	ACLY
microtubule anchoring (GO:0034453)	1/12	0.431071	0.769573	1.89065	1.59095	BCCIP
mitotic G1/S transition checkpoint signaling (GO:0044819)	1/12	0.431071	0.769573	1.89065	1.59095	CCND1
morphogenesis of a polarized epithelium (GO:0001738)	1/12	0.431071	0.769573	1.89065	1.59095	ACTB
mRNA transcription (GO:0009299)	1/12	0.431071	0.769573	1.89065	1.59095	MED1
negative regulation of amyloid fibril formation (GO:1905907)	1/12	0.431071	0.769573	1.89065	1.59095	VBP1
negative regulation of histone acetylation (GO:0035067)	1/12	0.431071	0.769573	1.89065	1.59095	SET
negative regulation of production of miRNAs involved in gene silencing by miRNA (GO:1903799)	1/12	0.431071	0.769573	1.89065	1.59095	STAT3
nuclear body organization (GO:0030575)	1/12	0.431071	0.769573	1.89065	1.59095	ZPR1
positive regulation of actin filament depolymerization (GO:0030836)	1/12	0.431071	0.769573	1.89065	1.59095	WDR1
positive regulation of protein depolymerization (GO:1901881)	1/12	0.431071	0.769573	1.89065	1.59095	WDR1
positive regulation of ubiquitin protein ligase activity (GO:1904668)	1/12	0.431071	0.769573	1.89065	1.59095	PLK1
posttranslational protein targeting to endoplasmic reticulum membrane (GO:0006620)	1/12	0.431071	0.769573	1.89065	1.59095	SEC61A1
protein localization to condensed chromosome (GO:1903083)	1/12	0.431071	0.769573	1.89065	1.59095	BUB3
chromatin assembly (GO:0031497)	4/73	0.432754	0.772026	1.20591	1.01005	CHAF1B;GRWD1;SMARCA5;CTCF
activation of phospholipase C activity (GO:0007202)	2/32	0.43551	0.772026	1.38661	1.1526	PHB;PHB2
regulation of cellular biosynthetic process (GO:0031326)	2/32	0.43551	0.772026	1.38661	1.1526	MED1;EIF6
regulation of centrosome duplication (GO:0010824)	2/32	0.43551	0.772026	1.38661	1.1526	STIL;NAT10
cellular response to topologically incorrect protein (GO:0035967)	2/32	0.43551	0.772026	1.38661	1.1526	HSPA9;BAK1
DNA damage checkpoint signaling (GO:0000077)	2/32	0.43551	0.772026	1.38661	1.1526	PRPF19;HINFP
intra-Golgi vesicle-mediated transport (GO:0006891)	2/32	0.43551	0.772026	1.38661	1.1526	COPA;COPB1
liver development (GO:0001889)	2/32	0.43551	0.772026	1.38661	1.1526	GFER;AURKA
positive regulation of immune effector process (GO:0002699)	2/32	0.43551	0.772026	1.38661	1.1526	RPS19;PHB
positive regulation of lamellipodium organization (GO:1902745)	2/32	0.43551	0.772026	1.38661	1.1526	NCKAP1;ACTR2
proteolysis involved in cellular protein catabolic process (GO:0051603)	4/74	0.443068	0.784873	1.18862	0.967575	PSMA6;LONP1;PRPF19;UBA52
neutrophil degranulation (GO:0043312)	23/481	0.450395	0.785599	1.04499	0.833517	ACTR2;CCT2;DDX3X;APAF1;PGAM1;COPB1;NDUFC2;HMGB1;EEF2;MAPK14;PSMA5;ACLY;PFKL;PKM;PSMD2;DNAJC5;PSMC2;CSNK2B;RAB18;LAMTOR2;LAMTOR1;CCT8;LAMTOR3
regulation of sprouting angiogenesis (GO:1903670)	2/33	0.451235	0.785599	1.34181	1.06777	PKM;PDPK1
signal transduction by p53 class mediator (GO:0072331)	2/33	0.451235	0.785599	1.34181	1.06777	MYBBP1A;TRIAP1
phosphatidylcholine biosynthetic process (GO:0006656)	2/33	0.451235	0.785599	1.34181	1.06777	STARD7;CSNK2B
cellular transition metal ion homeostasis (GO:0046916)	5/96	0.45203	0.785599	1.14289	0.907466	COX19;ATP6V1G1;SLC30A9;TFRC;MYC
regulation of proteolysis (GO:0030162)	3/54	0.453727	0.785599	1.22347	0.966856	PLK1;BAK1;OGT
positive regulation of DNA-binding transcription factor activity (GO:0051091)	12/246	0.456461	0.785599	1.06685	0.836678	PSMA6;COPS5;TFDP1;TFRC;DHX33;CHUK;TAF12;STAT3;RPS3;BCL10;PHB2;UBA52
purine ribonucleoside triphosphate metabolic process (GO:0009205)	1/13	0.4572	0.785599	1.73301	1.35631	OPA1
antifungal innate immune response (GO:0061760)	1/13	0.4572	0.785599	1.73301	1.35631	BCL10
regulation of actomyosin structure organization (GO:0110020)	1/13	0.4572	0.785599	1.73301	1.35631	ROCK2
regulation of antigen receptor-mediated signaling pathway (GO:0050854)	1/13	0.4572	0.785599	1.73301	1.35631	CBFB
regulation of chemokine (C-X-C motif) ligand 2 production (GO:2000341)	1/13	0.4572	0.785599	1.73301	1.35631	HMGB1
cellular component maintenance (GO:0043954)	1/13	0.4572	0.785599	1.73301	1.35631	SUPV3L1
cellular response to interleukin-15 (GO:0071350)	1/13	0.4572	0.785599	1.73301	1.35631	STAT3
regulation of histone modification (GO:0031056)	1/13	0.4572	0.785599	1.73301	1.35631	CDK9
central nervous system projection neuron axonogenesis (GO:0021952)	1/13	0.4572	0.785599	1.73301	1.35631	PAFAH1B1
DNA deamination (GO:0045006)	1/13	0.4572	0.785599	1.73301	1.35631	EXOSC4
regulation of nucleocytoplasmic transport (GO:0046822)	1/13	0.4572	0.785599	1.73301	1.35631	NUP214
embryonic hemopoiesis (GO:0035162)	1/13	0.4572	0.785599	1.73301	1.35631	KMT2A
regulation of tube diameter (GO:0035296)	1/13	0.4572	0.785599	1.73301	1.35631	ROCK2
glucose import (GO:0046323)	1/13	0.4572	0.785599	1.73301	1.35631	SLC2A1
Golgi ribbon formation (GO:0090161)	1/13	0.4572	0.785599	1.73301	1.35631	PRMT5
inner dynein arm assembly (GO:0036159)	1/13	0.4572	0.785599	1.73301	1.35631	DNAAF5
interleukin-15-mediated signaling pathway (GO:0035723)	1/13	0.4572	0.785599	1.73301	1.35631	STAT3
kinetochore organization (GO:0051383)	1/13	0.4572	0.785599	1.73301	1.35631	CENPW
spinal cord development (GO:0021510)	1/13	0.4572	0.785599	1.73301	1.35631	ZPR1
synaptic vesicle localization (GO:0097479)	1/13	0.4572	0.785599	1.73301	1.35631	DNM2
mitochondrial outer membrane permeabilization (GO:0097345)	1/13	0.4572	0.785599	1.73301	1.35631	BCL2L11
vascular process in circulatory system (GO:0003018)	1/13	0.4572	0.785599	1.73301	1.35631	ROCK2
mitotic DNA integrity checkpoint signaling (GO:0044774)	1/13	0.4572	0.785599	1.73301	1.35631	NAE1
negative regulation of DNA-dependent DNA replication (GO:2000104)	1/13	0.4572	0.785599	1.73301	1.35631	LIG3
negative regulation of hippo signaling (GO:0035331)	1/13	0.4572	0.785599	1.73301	1.35631	MAPK14
negative regulation of histone methylation (GO:0031061)	1/13	0.4572	0.785599	1.73301	1.35631	WDR5
negative regulation of intrinsic apoptotic signaling pathway in response to DNA damage by p53 class mediator (GO:1902166)	1/13	0.4572	0.785599	1.73301	1.35631	TRIAP1
negative regulation of locomotion (GO:0040013)	1/13	0.4572	0.785599	1.73301	1.35631	PIN1
negative regulation of macromolecule biosynthetic process (GO:0010558)	1/13	0.4572	0.785599	1.73301	1.35631	CLTC
negative regulation of viral release from host cell (GO:1902187)	1/13	0.4572	0.785599	1.73301	1.35631	TRIM28
plasma membrane repair (GO:0001778)	1/13	0.4572	0.785599	1.73301	1.35631	MYH9
polyamine metabolic process (GO:0006595)	1/13	0.4572	0.785599	1.73301	1.35631	DHPS
positive regulation of heterochromatin assembly (GO:0031453)	1/13	0.4572	0.785599	1.73301	1.35631	TRIM28
positive regulation of histone deacetylation (GO:0031065)	1/13	0.4572	0.785599	1.73301	1.35631	NIPBL
positive regulation of neuron migration (GO:2001224)	1/13	0.4572	0.785599	1.73301	1.35631	NIPBL
positive regulation of protein localization to cell surface (GO:2000010)	1/13	0.4572	0.785599	1.73301	1.35631	RANGRF
positive regulation of transporter activity (GO:0032411)	1/13	0.4572	0.785599	1.73301	1.35631	KMT2A
regulation of protein binding (GO:0043393)	6/118	0.458536	0.787356	1.11431	0.868846	PLK1;RPL11;PIN1;NMD3;ACTB;AURKA
ubiquitin-dependent protein catabolic process (GO:0006511)	17/354	0.459435	0.788362	1.04949	0.816253	RNF20;PLK1;RNF40;UBE2L3;AURKA;PSMA5;PSMA6;PSMC5;PSMA4;KAT5;PTTG1;PSMD2;PSMC1;PSMC2;ARIH1;BUB3;SKP2
actomyosin structure organization (GO:0031032)	4/76	0.46352	0.792742	1.15548	0.888458	WDR1;ROCK2;FLII;MYH9
positive regulation of interleukin-6 production (GO:0032755)	4/76	0.46352	0.792742	1.15548	0.888458	STAT3;HMGB1;BCL10;HSPD1
positive regulation of response to DNA damage stimulus (GO:2001022)	3/55	0.465766	0.792742	1.19987	0.91679	TRIM28;MYC;RPS3
negative regulation of apoptotic process (GO:0043066)	23/485	0.466506	0.792742	1.03572	0.78972	HSPA9;MED1;PRELID1;STIL;SET;DDX3X;TFRC;PLK1;WDR73;TRIAP1;PHB2;ATAD3A;HSPD1;SUPV3L1;COPS5;OPA1;MYC;BIRC5;VDAC1;VHL;NAA15;UBA52;TPT1
neutrophil activation involved in immune response (GO:0002283)	23/485	0.466506	0.792742	1.03572	0.78972	ACTR2;CCT2;DDX3X;APAF1;PGAM1;COPB1;NDUFC2;HMGB1;EEF2;MAPK14;PSMA5;ACLY;PFKL;PKM;PSMD2;DNAJC5;PSMC2;CSNK2B;RAB18;LAMTOR2;LAMTOR1;CCT8;LAMTOR3
regulation of activated T cell proliferation (GO:0046006)	2/34	0.466708	0.792742	1.29981	0.990522	RPS3;HMGB1
regulation of amyloid-beta formation (GO:1902003)	2/34	0.466708	0.792742	1.29981	0.990522	ROCK2;PIN1
regulation of transmembrane transport (GO:0034762)	2/34	0.466708	0.792742	1.29981	0.990522	SLC2A1;ACTB
response to steroid hormone (GO:0048545)	2/34	0.466708	0.792742	1.29981	0.990522	MED1;UBE2L3
negative regulation of blood vessel endothelial cell migration (GO:0043537)	2/34	0.466708	0.792742	1.29981	0.990522	CSNK2B;HMGB1
neural tube closure (GO:0001843)	2/34	0.466708	0.792742	1.29981	0.990522	STIL;BCL10
phosphatidylinositol 3-kinase signaling (GO:0014065)	2/34	0.466708	0.792742	1.29981	0.990522	C1QBP;PIK3C2A
positive regulation of mitochondrial outer membrane permeabilization involved in apoptotic signaling pathway (GO:1901030)	2/34	0.466708	0.792742	1.29981	0.990522	TFDP1;BAK1
protein destabilization (GO:0031648)	2/34	0.466708	0.792742	1.29981	0.990522	KDM8;PLK1
protein localization to chromosome (GO:0034502)	2/34	0.466708	0.792742	1.29981	0.990522	PLK1;CTCF
proteasomal protein catabolic process (GO:0010498)	10/205	0.467878	0.793264	1.0667	0.810209	PSMA5;PSMA6;PSMC5;PSMA4;KAT5;PSMD2;PSMC1;PSMC2;SKP2;PRPF19
cholesterol metabolic process (GO:0008203)	4/77	0.473646	0.793264	1.13959	0.851614	ACLY;FDPS;GGPS1;HMGCS1
negative regulation of developmental process (GO:0051093)	4/77	0.473646	0.793264	1.13959	0.851614	SUZ12;TFRC;ROCK2;WDR77
positive regulation of protein modification by small protein conjugation or removal (GO:1903322)	4/77	0.473646	0.793264	1.13959	0.851614	BCL10;SAE1;UBE2L3;GNL3
protein polyubiquitination (GO:0000209)	15/314	0.474532	0.793264	1.04351	0.777861	RNF20;CBFB;PRPF19;UBE2L3;PSMA5;PSMA6;PSMC5;PSMA4;HECTD1;PSMD2;PSMC1;PSMC2;ARIH1;SKP2;UBA52
macroautophagy (GO:0016236)	6/120	0.474732	0.793264	1.09464	0.815514	TOMM40;CSNK2B;TOMM7;VDAC1;TOMM20;TOMM22
telomere maintenance (GO:0000723)	3/56	0.477687	0.793264	1.17717	0.869696	RAD50;POLD1;SMC6
neutrophil mediated immunity (GO:0002446)	23/488	0.478569	0.793264	1.02887	0.758232	ACTR2;CCT2;DDX3X;APAF1;PGAM1;COPB1;NDUFC2;HMGB1;EEF2;MAPK14;PSMA5;ACLY;PFKL;PKM;PSMD2;DNAJC5;PSMC2;CSNK2B;RAB18;LAMTOR2;LAMTOR1;CCT8;LAMTOR3
double-strand break repair (GO:0006302)	8/164	0.481503	0.793264	1.06655	0.779482	FEN1;RAD50;KAT5;SMARCA5;LIG3;SMC6;HMGB1;PRPF19
cellular response to hydrogen peroxide (GO:0070301)	2/35	0.481918	0.793264	1.26035	0.920036	RPS3;ECT2
regulation of lipid biosynthetic process (GO:0046890)	2/35	0.481918	0.793264	1.26035	0.920036	EIF6;MTOR
regulation of T cell receptor signaling pathway (GO:0050856)	2/35	0.481918	0.793264	1.26035	0.920036	RPS3;BCL10
response to estrogen (GO:0043627)	2/35	0.481918	0.793264	1.26035	0.920036	RBBP5;PELP1
intracellular pH reduction (GO:0051452)	2/35	0.481918	0.793264	1.26035	0.920036	ATP6V1G1;ATP6V1E1
protein localization to vacuole (GO:0072665)	1/14	0.482131	0.793264	1.59961	1.16698	LAMTOR4
activation of cysteine-type endopeptidase activity (GO:0097202)	1/14	0.482131	0.793264	1.59961	1.16698	BAK1
aorta development (GO:0035904)	1/14	0.482131	0.793264	1.59961	1.16698	HECTD1
cellular copper ion homeostasis (GO:0006878)	1/14	0.482131	0.793264	1.59961	1.16698	COX19
regulation of DNA methylation-dependent heterochromatin assembly (GO:0090308)	1/14	0.482131	0.793264	1.59961	1.16698	TRIM28
regulation of gastrulation (GO:0010470)	1/14	0.482131	0.793264	1.59961	1.16698	FOXA2
regulation of histone deacetylation (GO:0031063)	1/14	0.482131	0.793264	1.59961	1.16698	NIPBL
regulation of lamellipodium organization (GO:1902743)	1/14	0.482131	0.793264	1.59961	1.16698	CAPZB
coenzyme A metabolic process (GO:0015936)	1/14	0.482131	0.793264	1.59961	1.16698	ACLY
covalent chromatin modification (GO:0016569)	1/14	0.482131	0.793264	1.59961	1.16698	MBD2
regulation of retinoic acid receptor signaling pathway (GO:0048385)	1/14	0.482131	0.793264	1.59961	1.16698	SNW1
ether lipid metabolic process (GO:0046485)	1/14	0.482131	0.793264	1.59961	1.16698	PAFAH1B1
regulation of transcription of nucleolar large rRNA by RNA polymerase I (GO:1901836)	1/14	0.482131	0.793264	1.59961	1.16698	MTOR
regulation of trophoblast cell migration (GO:1901163)	1/14	0.482131	0.793264	1.59961	1.16698	C1QBP
respiratory electron transport chain (GO:0022904)	1/14	0.482131	0.793264	1.59961	1.16698	UQCRFS1
growth hormone receptor signaling pathway via JAK-STAT (GO:0060397)	1/14	0.482131	0.793264	1.59961	1.16698	STAT3
response to UV-A (GO:0070141)	1/14	0.482131	0.793264	1.59961	1.16698	CCND1
response to X-ray (GO:0010165)	1/14	0.482131	0.793264	1.59961	1.16698	NIPBL
striated muscle cell development (GO:0055002)	1/14	0.482131	0.793264	1.59961	1.16698	FLII
sulfate transport (GO:0008272)	1/14	0.482131	0.793264	1.59961	1.16698	RACGAP1
T-helper cell differentiation (GO:0042093)	1/14	0.482131	0.793264	1.59961	1.16698	HMGB1
myeloid dendritic cell activation (GO:0001773)	1/14	0.482131	0.793264	1.59961	1.16698	HMGB1
ncRNA transcription (GO:0098781)	1/14	0.482131	0.793264	1.59961	1.16698	NIFK
negative regulation of interleukin-12 production (GO:0032695)	1/14	0.482131	0.793264	1.59961	1.16698	C1QBP
neuromuscular process controlling balance (GO:0050885)	1/14	0.482131	0.793264	1.59961	1.16698	PAFAH1B1
nuclear migration (GO:0007097)	1/14	0.482131	0.793264	1.59961	1.16698	PAFAH1B1
nuclear pore organization (GO:0006999)	1/14	0.482131	0.793264	1.59961	1.16698	SEH1L
ovarian follicle development (GO:0001541)	1/14	0.482131	0.793264	1.59961	1.16698	EIF2B2
positive regulation of alpha-beta T cell differentiation (GO:0046638)	1/14	0.482131	0.793264	1.59961	1.16698	CBFB
positive regulation of brown fat cell differentiation (GO:0090336)	1/14	0.482131	0.793264	1.59961	1.16698	HNRNPU
positive regulation of cyclase activity (GO:0031281)	1/14	0.482131	0.793264	1.59961	1.16698	MAPK14
positive regulation of protein deacetylation (GO:0090312)	1/14	0.482131	0.793264	1.59961	1.16698	NIPBL
pre-miRNA processing (GO:0031054)	1/14	0.482131	0.793264	1.59961	1.16698	MRPL44
protein localization to kinetochore (GO:0034501)	1/14	0.482131	0.793264	1.59961	1.16698	BUB3
protein modification process (GO:0036211)	4/78	0.483699	0.795325	1.12414	0.816451	MCRS1;UBA3;UBA52;UBE2L3
negative regulation of canonical Wnt signaling pathway (GO:0090090)	8/165	0.488385	0.802507	1.0597	0.759438	PSMA5;PSMA6;PSMC5;PSMA4;PSMD2;RUVBL2;PSMC1;PSMC2
regulation of reactive oxygen species metabolic process (GO:2000377)	3/57	0.489482	0.803784	1.15531	0.825365	EIF6;ROMO1;MAPK14
transmembrane receptor protein tyrosine kinase signaling pathway (GO:0007169)	19/404	0.490161	0.804375	1.02637	0.731826	NCKAP1;ACTR2;ATP6V1G1;NCBP1;ROCK2;STAT3;PIK3C2A;MAPK14;ACTB;PTBP1;POLR2B;HNRNPF;POLR2C;POLR2D;AP2S1;POLR2G;ATP6V1E1;AAMP;POLR2K
recombinational repair (GO:0000725)	4/79	0.493675	0.806587	1.10909	0.782881	FEN1;RAD50;LIG3;SMC6
regulation of cellular response to heat (GO:1900034)	4/79	0.493675	0.806587	1.10909	0.782881	RPTOR;NUP214;SEH1L;MTOR
positive regulation of proteasomal ubiquitin-dependent protein catabolic process (GO:0032436)	4/79	0.493675	0.806587	1.10909	0.782881	HECTD1;SUMO2;PLK1;ARIH1
positive regulation of ubiquitin-dependent protein catabolic process (GO:2000060)	4/79	0.493675	0.806587	1.10909	0.782881	HECTD1;SUMO2;PLK1;ARIH1
cellular response to chemical stress (GO:0062197)	5/101	0.496554	0.806587	1.08308	0.758226	PNPT1;DDX3X;PYROXD1;LONP1;CYCS
axonal transport (GO:0098930)	2/36	0.496857	0.806587	1.22322	0.855586	OPA1;PAFAH1B1
intrinsic apoptotic signaling pathway by p53 class mediator (GO:0072332)	2/36	0.496857	0.806587	1.22322	0.855586	SNW1;MYBBP1A
positive regulation of innate immune response (GO:0045089)	2/36	0.496857	0.806587	1.22322	0.855586	RPS19;POLR3F
positive regulation of interferon-beta production (GO:0032728)	2/36	0.496857	0.806587	1.22322	0.855586	DDX3X;POLR3F
receptor metabolic process (GO:0043112)	3/58	0.501145	0.806587	1.13425	0.783606	TFRC;CLTC;DNM2
cellular iron ion homeostasis (GO:0006879)	3/58	0.501145	0.806587	1.13425	0.783606	ATP6V1G1;TFRC;MYC
eye development (GO:0001654)	3/58	0.501145	0.806587	1.13425	0.783606	NIPBL;SCO2;RAB18
nucleosome assembly (GO:0006334)	3/58	0.501145	0.806587	1.13425	0.783606	CHAF1B;GRWD1;SMARCA5
positive regulation of protein binding (GO:0032092)	3/58	0.501145	0.806587	1.13425	0.783606	RPL11;PIN1;NMD3
regulation of NIK/NF-kappaB signaling (GO:1901222)	4/80	0.503569	0.806587	1.09444	0.750822	DDX3X;RPS3;PHB;PHB2
regulation of protein localization to plasma membrane (GO:1903076)	4/80	0.503569	0.806587	1.09444	0.750822	PDPK1;CLTC;RANGRF;ACTB
protein trimerization (GO:0070206)	1/15	0.505918	0.806587	1.48528	1.01204	PNPT1
regulation of aerobic respiration (GO:1903715)	1/15	0.505918	0.806587	1.48528	1.01204	UQCC2
regulation of amyloid fibril formation (GO:1905906)	1/15	0.505918	0.806587	1.48528	1.01204	VBP1
Arp2/3 complex-mediated actin nucleation (GO:0034314)	1/15	0.505918	0.806587	1.48528	1.01204	ACTR2
C21-steroid hormone biosynthetic process (GO:0006700)	1/15	0.505918	0.806587	1.48528	1.01204	FDXR
regulation of cytoplasmic translation (GO:2000765)	1/15	0.505918	0.806587	1.48528	1.01204	PKM
cellular response to arsenic-containing substance (GO:0071243)	1/15	0.505918	0.806587	1.48528	1.01204	DDX3X
cellular response to estrogen stimulus (GO:0071391)	1/15	0.505918	0.806587	1.48528	1.01204	PELP1
regulation of nuclear-transcribed mRNA catabolic process, deadenylation-dependent decay (GO:1900151)	1/15	0.505918	0.806587	1.48528	1.01204	PABPC1
electron transport chain (GO:0022900)	1/15	0.505918	0.806587	1.48528	1.01204	UQCRFS1
embryonic cranial skeleton morphogenesis (GO:0048701)	1/15	0.505918	0.806587	1.48528	1.01204	NIPBL
endoplasmic reticulum tubular network organization (GO:0071786)	1/15	0.505918	0.806587	1.48528	1.01204	RAB18
GTP metabolic process (GO:0046039)	1/15	0.505918	0.806587	1.48528	1.01204	OPA1
response to ethanol (GO:0045471)	1/15	0.505918	0.806587	1.48528	1.01204	ADH7
RNA phosphodiester bond hydrolysis, endonucleolytic (GO:0090502)	1/15	0.505918	0.806587	1.48528	1.01204	RNASEH1
interleukin-27-mediated signaling pathway (GO:0070106)	1/15	0.505918	0.806587	1.48528	1.01204	STAT3
steroid hormone mediated signaling pathway (GO:0043401)	1/15	0.505918	0.806587	1.48528	1.01204	MED1
medium-chain fatty acid metabolic process (GO:0051791)	1/15	0.505918	0.806587	1.48528	1.01204	OXSM
modulation by host of viral genome replication (GO:0044827)	1/15	0.505918	0.806587	1.48528	1.01204	PHB
myoblast differentiation (GO:0045445)	1/15	0.505918	0.806587	1.48528	1.01204	HINFP
negative regulation of androgen receptor signaling pathway (GO:0060766)	1/15	0.505918	0.806587	1.48528	1.01204	PHB
negative regulation of cellular component movement (GO:0051271)	1/15	0.505918	0.806587	1.48528	1.01204	PIN1
negative regulation of endoplasmic reticulum stress-induced intrinsic apoptotic signaling pathway (GO:1902236)	1/15	0.505918	0.806587	1.48528	1.01204	OPA1
phosphatidylethanolamine biosynthetic process (GO:0006646)	1/15	0.505918	0.806587	1.48528	1.01204	PISD
positive regulation of DNA damage response, signal transduction by p53 class mediator (GO:0043517)	1/15	0.505918	0.806587	1.48528	1.01204	RPL26
positive regulation of keratinocyte differentiation (GO:0045618)	1/15	0.505918	0.806587	1.48528	1.01204	MED1
positive regulation of nuclear-transcribed mRNA catabolic process, deadenylation-dependent decay (GO:1900153)	1/15	0.505918	0.806587	1.48528	1.01204	PABPC1
protein homotrimerization (GO:0070207)	1/15	0.505918	0.806587	1.48528	1.01204	PNPT1
protein localization to cell-cell junction (GO:0150105)	1/15	0.505918	0.806587	1.48528	1.01204	ACTB
proteasome-mediated ubiquitin-dependent protein catabolic process (GO:0043161)	15/321	0.509252	0.811389	1.01926	0.687809	PLK1;CUL2;AURKA;PSMA5;PSMA6;PSMC5;PSMA4;KAT5;PTTG1;PSMD2;PSMC1;PSMC2;BUB3;SKP2;UBA52
acyl-CoA metabolic process (GO:0006637)	2/37	0.511518	0.811406	1.18821	0.796544	HMGCS1;OXSM
regulation of microtubule cytoskeleton organization (GO:0070507)	2/37	0.511518	0.811406	1.18821	0.796544	MAPRE1;SKA2
regulation of protein autophosphorylation (GO:0031952)	2/37	0.511518	0.811406	1.18821	0.796544	RAD50;DDX3X
lysosome localization (GO:0032418)	2/37	0.511518	0.811406	1.18821	0.796544	MYH9;LAMTOR1
phagosome maturation (GO:0090382)	2/37	0.511518	0.811406	1.18821	0.796544	ATP6V1G1;ATP6V1E1
phospholipid biosynthetic process (GO:0008654)	2/37	0.511518	0.811406	1.18821	0.796544	FDPS;CRLS1
positive regulation of cytokinesis (GO:0032467)	2/37	0.511518	0.811406	1.18821	0.796544	RACGAP1;ECT2
fatty acid oxidation (GO:0019395)	3/59	0.51267	0.811701	1.11393	0.744245	ADH7;HSD17B10;MCAT
response to reactive oxygen species (GO:0000302)	3/59	0.51267	0.811701	1.11393	0.744245	CHUK;RPS3;ROMO1
selective autophagy (GO:0061912)	3/59	0.51267	0.811701	1.11393	0.744245	USP30;PHB2;UBA52
regulation of interleukin-8 production (GO:0032677)	4/81	0.513376	0.812309	1.08017	0.720197	STAT3;HMGB1;BCL10;CACTIN
ephrin receptor signaling pathway (GO:0048013)	4/82	0.523094	0.816417	1.06626	0.690932	ACTR2;ROCK2;AP2S1;ACTB
apical junction assembly (GO:0043297)	3/60	0.524053	0.816417	1.09433	0.707119	WDR1;TBCD;ECT2
Notch signaling pathway (GO:0007219)	3/60	0.524053	0.816417	1.09433	0.707119	SNW1;MYC;NLE1
peptidyl-threonine phosphorylation (GO:0018107)	3/60	0.524053	0.816417	1.09433	0.707119	PDPK1;ROCK2;CSNK2B
regulation of phosphoprotein phosphatase activity (GO:0043666)	2/38	0.525895	0.816417	1.15514	0.742358	CSNK2B;MTOR
negative regulation of endothelial cell migration (GO:0010596)	2/38	0.525895	0.816417	1.15514	0.742358	CSNK2B;HMGB1
negative regulation of innate immune response (GO:0045824)	2/38	0.525895	0.816417	1.15514	0.742358	RPS19;CACTIN
negative regulation of proteasomal protein catabolic process (GO:1901799)	2/38	0.525895	0.816417	1.15514	0.742358	RPL11;OGT
positive regulation of production of molecular mediator of immune response (GO:0002702)	2/38	0.525895	0.816417	1.15514	0.742358	PHB;PHB2
regulation of activin receptor signaling pathway (GO:0032925)	1/16	0.528613	0.816417	1.38619	0.883692	CSNK2B
apoptotic DNA fragmentation (GO:0006309)	1/16	0.528613	0.816417	1.38619	0.883692	HMGB1
regulation of chromatin silencing (GO:0031935)	1/16	0.528613	0.816417	1.38619	0.883692	CDC45
regulation of defense response to virus (GO:0050688)	1/16	0.528613	0.816417	1.38619	0.883692	C1QBP
regulation of establishment of cell polarity (GO:2000114)	1/16	0.528613	0.816417	1.38619	0.883692	ROCK2
regulation of interleukin-1 production (GO:0032652)	1/16	0.528613	0.816417	1.38619	0.883692	HMGB1
regulation of isotype switching (GO:0045191)	1/16	0.528613	0.816417	1.38619	0.883692	TFRC
dendritic cell chemotaxis (GO:0002407)	1/16	0.528613	0.816417	1.38619	0.883692	HMGB1
regulation of monocyte differentiation (GO:0045655)	1/16	0.528613	0.816417	1.38619	0.883692	MYC
digestive tract morphogenesis (GO:0048546)	1/16	0.528613	0.816417	1.38619	0.883692	NIPBL
regulation of oxidative phosphorylation (GO:0002082)	1/16	0.528613	0.816417	1.38619	0.883692	UQCC2
regulation of Rac protein signal transduction (GO:0035020)	1/16	0.528613	0.816417	1.38619	0.883692	OGT
response to organophosphorus (GO:0046683)	1/16	0.528613	0.816417	1.38619	0.883692	TYMS
retrograde axonal transport (GO:0008090)	1/16	0.528613	0.816417	1.38619	0.883692	PAFAH1B1
necroptotic process (GO:0070266)	1/16	0.528613	0.816417	1.38619	0.883692	DNM1L
negative regulation of DNA replication (GO:0008156)	1/16	0.528613	0.816417	1.38619	0.883692	GTPBP4
negative regulation of histone modification (GO:0031057)	1/16	0.528613	0.816417	1.38619	0.883692	SET
negative regulation of immune effector process (GO:0002698)	1/16	0.528613	0.816417	1.38619	0.883692	RPS19
negative regulation of receptor signaling pathway via JAK-STAT (GO:0046426)	1/16	0.528613	0.816417	1.38619	0.883692	VHL
negative regulation of telomere maintenance (GO:0032205)	1/16	0.528613	0.816417	1.38619	0.883692	RAD50
negative regulation of type I interferon-mediated signaling pathway (GO:0060339)	1/16	0.528613	0.816417	1.38619	0.883692	CACTIN
neural tube development (GO:0021915)	1/16	0.528613	0.816417	1.38619	0.883692	STIL
nuclear transport (GO:0051169)	1/16	0.528613	0.816417	1.38619	0.883692	NUTF2
platelet-derived growth factor receptor signaling pathway (GO:0048008)	1/16	0.528613	0.816417	1.38619	0.883692	PIK3C2A
positive regulation by host of viral transcription (GO:0043923)	1/16	0.528613	0.816417	1.38619	0.883692	SNW1
positive regulation of immunoglobulin mediated immune response (GO:0002891)	1/16	0.528613	0.816417	1.38619	0.883692	TFRC
positive regulation of isotype switching (GO:0045830)	1/16	0.528613	0.816417	1.38619	0.883692	TFRC
positive regulation of myeloid leukocyte cytokine production involved in immune response (GO:0061081)	1/16	0.528613	0.816417	1.38619	0.883692	BCL10
positive regulation of syncytium formation by plasma membrane fusion (GO:0060143)	1/16	0.528613	0.816417	1.38619	0.883692	MAPK14
protein localization to microtubule organizing center (GO:1905508)	1/16	0.528613	0.816417	1.38619	0.883692	STIL
iron ion homeostasis (GO:0055072)	3/61	0.535287	0.825207	1.07541	0.67208	ATP6V1G1;TFRC;MYC
pattern recognition receptor signaling pathway (GO:0002221)	3/61	0.535287	0.825207	1.07541	0.67208	HMGB1;BCL10;UBA52
positive regulation of interleukin-8 production (GO:0032757)	3/61	0.535287	0.825207	1.07541	0.67208	STAT3;HMGB1;BCL10
small GTPase mediated signal transduction (GO:0007264)	5/106	0.539646	0.827885	1.02919	0.634849	CCNA2;TRIM28;RRAGC;RAB18;MAPK14
protein monoubiquitination (GO:0006513)	2/39	0.539982	0.827885	1.12386	0.692546	RNF20;RNF40
regulation of ion transmembrane transporter activity (GO:0032412)	2/39	0.539982	0.827885	1.12386	0.692546	RANGRF;PHB2
regulation of nitric-oxide synthase activity (GO:0050999)	2/39	0.539982	0.827885	1.12386	0.692546	DHFR;DNM2
regulation of peptidyl-threonine phosphorylation (GO:0010799)	2/39	0.539982	0.827885	1.12386	0.692546	RPTOR;PLK1
regulation of T cell differentiation (GO:0045580)	2/39	0.539982	0.827885	1.12386	0.692546	PRELID1;CBFB
replication fork processing (GO:0031297)	2/39	0.539982	0.827885	1.12386	0.692546	CDK9;ALYREF
membrane protein proteolysis (GO:0033619)	2/39	0.539982	0.827885	1.12386	0.692546	MBTPS1;MYH9
protein acylation (GO:0043543)	2/39	0.539982	0.827885	1.12386	0.692546	KAT6A;NAT10
response to insulin (GO:0032868)	4/84	0.542244	0.830511	1.0395	0.636213	PKM;EIF6;PDPK1;OGT
glucose metabolic process (GO:0006006)	3/62	0.546369	0.830511	1.05713	0.638991	TPI1;PGAM1;GAPDH
stress-activated MAPK cascade (GO:0051403)	3/62	0.546369	0.830511	1.05713	0.638991	CHUK;MAPK14;UBA52
negative regulation of kinase activity (GO:0033673)	3/62	0.546369	0.830511	1.05713	0.638991	PDPK1;PRKRIP1;HNRNPU
acyl-CoA biosynthetic process (GO:0071616)	1/17	0.550267	0.830511	1.29948	0.776248	ACLY
regulation of Arp2/3 complex-mediated actin nucleation (GO:0034315)	1/17	0.550267	0.830511	1.29948	0.776248	NCKAP1
regulation of cholesterol biosynthetic process (GO:0045540)	1/17	0.550267	0.830511	1.29948	0.776248	MBTPS1
regulation of establishment of endothelial barrier (GO:1903140)	1/17	0.550267	0.830511	1.29948	0.776248	ROCK2
cellular response to gamma radiation (GO:0071480)	1/17	0.550267	0.830511	1.29948	0.776248	RPL26
copper ion homeostasis (GO:0055070)	1/17	0.550267	0.830511	1.29948	0.776248	COX19
diol biosynthetic process (GO:0034312)	1/17	0.550267	0.830511	1.29948	0.776248	DHFR
regulation of receptor recycling (GO:0001919)	1/17	0.550267	0.830511	1.29948	0.776248	LAMTOR1
establishment of protein localization to endoplasmic reticulum (GO:0072599)	1/17	0.550267	0.830511	1.29948	0.776248	SEC61A1
regulation of stem cell proliferation (GO:0072091)	1/17	0.550267	0.830511	1.29948	0.776248	HNRNPU
gliogenesis (GO:0042063)	1/17	0.550267	0.830511	1.29948	0.776248	METTL14
snRNA metabolic process (GO:0016073)	1/17	0.550267	0.830511	1.29948	0.776248	INTS2
negative regulation of amyloid-beta formation (GO:1902430)	1/17	0.550267	0.830511	1.29948	0.776248	PIN1
negative regulation of intrinsic apoptotic signaling pathway by p53 class mediator (GO:1902254)	1/17	0.550267	0.830511	1.29948	0.776248	TRIAP1
negative regulation of phagocytosis (GO:0050765)	1/17	0.550267	0.830511	1.29948	0.776248	HMGB1
positive regulation of cyclin-dependent protein serine/threonine kinase activity (GO:0045737)	1/17	0.550267	0.830511	1.29948	0.776248	CCND1
positive regulation of cytokine production involved in inflammatory response (GO:1900017)	1/17	0.550267	0.830511	1.29948	0.776248	STAT3
positive regulation of macrophage activation (GO:0043032)	1/17	0.550267	0.830511	1.29948	0.776248	HSPD1
positive regulation of muscle hypertrophy (GO:0014742)	1/17	0.550267	0.830511	1.29948	0.776248	ROCK2
positive regulation of stem cell differentiation (GO:2000738)	1/17	0.550267	0.830511	1.29948	0.776248	NUDT21
positive regulation of transcription of Notch receptor target (GO:0007221)	1/17	0.550267	0.830511	1.29948	0.776248	SNW1
preassembly of GPI anchor in ER membrane (GO:0016254)	1/17	0.550267	0.830511	1.29948	0.776248	PIGW
retrograde vesicle-mediated transport, Golgi to endoplasmic reticulum (GO:0006890)	4/85	0.55167	0.83213	1.02661	0.610633	COPA;RACGAP1;COPB1;KIF11
autophagy of mitochondrion (GO:0000422)	2/40	0.553777	0.833811	1.09423	0.646683	USP30;PHB2
positive regulation of catalytic activity (GO:0043085)	2/40	0.553777	0.833811	1.09423	0.646683	SSBP1;MAPK14
positive regulation of double-strand break repair (GO:2000781)	2/40	0.553777	0.833811	1.09423	0.646683	ACTR2;MMS19
regulation of protein dephosphorylation (GO:0035304)	2/41	0.567277	0.842511	1.06612	0.604391	PTBP1;PIN1
visual system development (GO:0150063)	2/41	0.567277	0.842511	1.06612	0.604391	SCO2;RAB18
regulation of innate immune response (GO:0045088)	3/64	0.568062	0.842511	1.02236	0.578169	POLR3F;CACTIN;ABCE1
glycerophospholipid biosynthetic process (GO:0046474)	8/177	0.568563	0.842511	0.983835	0.555516	PGS1;TAMM41;STARD7;CSNK2B;PIK3C2A;CDIPT;CRLS1;PISD
3'-UTR-mediated mRNA stabilization (GO:0070935)	1/18	0.570927	0.842511	1.22298	0.685471	MAPK14
alternative mRNA splicing, via spliceosome (GO:0000380)	1/18	0.570927	0.842511	1.22298	0.685471	SRSF1
regulation of B cell differentiation (GO:0045577)	1/18	0.570927	0.842511	1.22298	0.685471	PPP2R3C
regulation of cellular protein catabolic process (GO:1903362)	1/18	0.570927	0.842511	1.22298	0.685471	RGP1
regulation of chromosome segregation (GO:0051983)	1/18	0.570927	0.842511	1.22298	0.685471	SMC6
regulation of establishment or maintenance of cell polarity (GO:0032878)	1/18	0.570927	0.842511	1.22298	0.685471	ROCK2
regulation of fatty acid metabolic process (GO:0019217)	1/18	0.570927	0.842511	1.22298	0.685471	EIF6
regulation of membrane depolarization (GO:0003254)	1/18	0.570927	0.842511	1.22298	0.685471	RANGRF
regulation of mitochondrial outer membrane permeabilization involved in apoptotic signaling pathway (GO:1901028)	1/18	0.570927	0.842511	1.22298	0.685471	BAK1
dendritic cell migration (GO:0036336)	1/18	0.570927	0.842511	1.22298	0.685471	HMGB1
embryonic axis specification (GO:0000578)	1/18	0.570927	0.842511	1.22298	0.685471	STIL
regulation of protein-containing complex disassembly (GO:0043244)	1/18	0.570927	0.842511	1.22298	0.685471	ETF1
establishment of vesicle localization (GO:0051650)	1/18	0.570927	0.842511	1.22298	0.685471	DNM2
regulation of telomere maintenance via telomere lengthening (GO:1904356)	1/18	0.570927	0.842511	1.22298	0.685471	NAF1
response to axon injury (GO:0048678)	1/18	0.570927	0.842511	1.22298	0.685471	DHFR
interleukin-6-mediated signaling pathway (GO:0070102)	1/18	0.570927	0.842511	1.22298	0.685471	STAT3
microtubule depolymerization (GO:0007019)	1/18	0.570927	0.842511	1.22298	0.685471	KIF18B
negative regulation of fibroblast proliferation (GO:0048147)	1/18	0.570927	0.842511	1.22298	0.685471	MYC
negative regulation of interleukin-8 production (GO:0032717)	1/18	0.570927	0.842511	1.22298	0.685471	CACTIN
neuron maturation (GO:0042551)	1/18	0.570927	0.842511	1.22298	0.685471	MTCH1
outer dynein arm assembly (GO:0036158)	1/18	0.570927	0.842511	1.22298	0.685471	DNAAF5
phosphatidylglycerol acyl-chain remodeling (GO:0036148)	1/18	0.570927	0.842511	1.22298	0.685471	CRLS1
positive regulation of amyloid-beta formation (GO:1902004)	1/18	0.570927	0.842511	1.22298	0.685471	ROCK2
positive regulation of cardiac muscle hypertrophy (GO:0010613)	1/18	0.570927	0.842511	1.22298	0.685471	ROCK2
positive regulation of cell cycle phase transition (GO:1901989)	1/18	0.570927	0.842511	1.22298	0.685471	PHB2
positive regulation of cell migration involved in sprouting angiogenesis (GO:0090050)	1/18	0.570927	0.842511	1.22298	0.685471	PIK3C2A
positive regulation of myoblast differentiation (GO:0045663)	1/18	0.570927	0.842511	1.22298	0.685471	MAPK14
positive regulation of nitric-oxide synthase activity (GO:0051000)	1/18	0.570927	0.842511	1.22298	0.685471	DHFR
positive regulation of phosphoprotein phosphatase activity (GO:0032516)	1/18	0.570927	0.842511	1.22298	0.685471	MTOR
programmed necrotic cell death (GO:0097300)	1/18	0.570927	0.842511	1.22298	0.685471	DNM1L
regulation of cell differentiation (GO:0045595)	7/156	0.57853	0.85323	0.976366	0.534331	CDK9;SUZ12;PTBP1;CBFB;UQCC2;PDCD2;VHL
regulation of double-strand break repair (GO:2000779)	2/42	0.580479	0.855103	1.03941	0.565338	ACTR2;PPP4C
positive regulation of ATPase activity (GO:0032781)	2/42	0.580479	0.855103	1.03941	0.565338	HNRNPU;SSBP1
cell-cell junction assembly (GO:0007043)	3/66	0.589104	0.856053	0.9898	0.523755	WDR1;TBCD;ACTB
ERBB signaling pathway (GO:0038127)	3/66	0.589104	0.856053	0.9898	0.523755	PDPK1;PIK3C2A;AAMP
positive regulation of T cell proliferation (GO:0042102)	3/66	0.589104	0.856053	0.9898	0.523755	TFRC;RPS3;HMGB1
Rac protein signal transduction (GO:0016601)	1/19	0.590639	0.856053	1.15497	0.608151	NCKAP1
branching involved in ureteric bud morphogenesis (GO:0001658)	1/19	0.590639	0.856053	1.15497	0.608151	MYC
regulation of cell-cell adhesion mediated by cadherin (GO:2000047)	1/19	0.590639	0.856053	1.15497	0.608151	FOXA2
regulation of centriole replication (GO:0046599)	1/19	0.590639	0.856053	1.15497	0.608151	STIL
cellular response to interleukin-7 (GO:0098761)	1/19	0.590639	0.856053	1.15497	0.608151	STAT3
regulation of glucose transmembrane transport (GO:0010827)	1/19	0.590639	0.856053	1.15497	0.608151	SLC2A1
regulation of mitochondrial membrane permeability (GO:0046902)	1/19	0.590639	0.856053	1.15497	0.608151	BAK1
regulation of nervous system process (GO:0031644)	1/19	0.590639	0.856053	1.15497	0.608151	ROCK2
DNA alkylation (GO:0006305)	1/19	0.590639	0.856053	1.15497	0.608151	DMAP1
DNA methylation or demethylation (GO:0044728)	1/19	0.590639	0.856053	1.15497	0.608151	DMAP1
endoplasmic reticulum mannose trimming (GO:1904380)	1/19	0.590639	0.856053	1.15497	0.608151	UBA52
regulation of RIG-I signaling pathway (GO:0039535)	1/19	0.590639	0.856053	1.15497	0.608151	C1QBP
ethanol metabolic process (GO:0006067)	1/19	0.590639	0.856053	1.15497	0.608151	ADH7
fatty acid transmembrane transport (GO:1902001)	1/19	0.590639	0.856053	1.15497	0.608151	SLC2A1
folic acid metabolic process (GO:0046655)	1/19	0.590639	0.856053	1.15497	0.608151	DHFR
interleukin-7-mediated signaling pathway (GO:0038111)	1/19	0.590639	0.856053	1.15497	0.608151	STAT3
telomere capping (GO:0016233)	1/19	0.590639	0.856053	1.15497	0.608151	RAD50
ureteric bud morphogenesis (GO:0060675)	1/19	0.590639	0.856053	1.15497	0.608151	MYC
mitochondrion localization (GO:0051646)	1/19	0.590639	0.856053	1.15497	0.608151	MSTO1
negative regulation of amyloid precursor protein catabolic process (GO:1902992)	1/19	0.590639	0.856053	1.15497	0.608151	PIN1
neuromuscular process (GO:0050905)	1/19	0.590639	0.856053	1.15497	0.608151	PAFAH1B1
nuclear membrane organization (GO:0071763)	1/19	0.590639	0.856053	1.15497	0.608151	PLK1
nucleotide-sugar biosynthetic process (GO:0009226)	1/19	0.590639	0.856053	1.15497	0.608151	GMPPB
positive regulation of leukocyte activation (GO:0002696)	1/19	0.590639	0.856053	1.15497	0.608151	HSPD1
positive regulation of monocyte chemotaxis (GO:0090026)	1/19	0.590639	0.856053	1.15497	0.608151	HMGB1
regulation of cytokine production involved in inflammatory response (GO:1900015)	2/43	0.593382	0.857069	1.01401	0.529227	STAT3;MAPK14
cellular response to retinoic acid (GO:0071300)	2/43	0.593382	0.857069	1.01401	0.529227	NDUFA13;SNW1
substantia nigra development (GO:0021762)	2/43	0.593382	0.857069	1.01401	0.529227	ACTB;COX6B1
myofibril assembly (GO:0030239)	2/43	0.593382	0.857069	1.01401	0.529227	WDR1;FLII
negative regulation of type I interferon production (GO:0032480)	2/43	0.593382	0.857069	1.01401	0.529227	PIN1;CACTIN
positive regulation of phospholipase C activity (GO:0010863)	2/43	0.593382	0.857069	1.01401	0.529227	PHB;PHB2
positive regulation of autophagy (GO:0010508)	4/90	0.597193	0.862079	0.966668	0.498333	KAT5;HMGB1;PIK3C2A;PHB2
peptidyl-threonine modification (GO:0018210)	3/67	0.599374	0.864733	0.974283	0.498705	PDPK1;ROCK2;CSNK2B
positive regulation of supramolecular fiber organization (GO:1902905)	4/91	0.605959	0.865427	0.955507	0.478654	NCKAP1;WDR1;RPS3;MAPRE1
positive regulation of cell division (GO:0051781)	2/44	0.605986	0.865427	0.989811	0.495795	RACGAP1;ECT2
protein K63-linked ubiquitination (GO:0070534)	2/44	0.605986	0.865427	0.989811	0.495795	HECTD1;PRPF19
branched-chain amino acid catabolic process (GO:0009083)	1/20	0.609447	0.865427	1.09413	0.541816	HSD17B10
branched-chain amino acid metabolic process (GO:0009081)	1/20	0.609447	0.865427	1.09413	0.541816	HSD17B10
cardiac ventricle development (GO:0003231)	1/20	0.609447	0.865427	1.09413	0.541816	HECTD1
cellular response to nitrogen compound (GO:1901699)	1/20	0.609447	0.865427	1.09413	0.541816	ROCK2
regulation of hippo signaling (GO:0035330)	1/20	0.609447	0.865427	1.09413	0.541816	MAPK14
regulation of lymphocyte differentiation (GO:0045619)	1/20	0.609447	0.865427	1.09413	0.541816	PRELID1
dopaminergic neuron differentiation (GO:0071542)	1/20	0.609447	0.865427	1.09413	0.541816	FOXA2
embryonic digestive tract development (GO:0048566)	1/20	0.609447	0.865427	1.09413	0.541816	NIPBL
regulation of programmed necrotic cell death (GO:0062098)	1/20	0.609447	0.865427	1.09413	0.541816	OGT
endoplasmic reticulum calcium ion homeostasis (GO:0032469)	1/20	0.609447	0.865427	1.09413	0.541816	BAK1
energy reserve metabolic process (GO:0006112)	1/20	0.609447	0.865427	1.09413	0.541816	MYC
folic acid-containing compound metabolic process (GO:0006760)	1/20	0.609447	0.865427	1.09413	0.541816	DHFR
glucose transmembrane transport (GO:1904659)	1/20	0.609447	0.865427	1.09413	0.541816	SLC2A1
growth hormone receptor signaling pathway (GO:0060396)	1/20	0.609447	0.865427	1.09413	0.541816	STAT3
lipopolysaccharide-mediated signaling pathway (GO:0031663)	1/20	0.609447	0.865427	1.09413	0.541816	BCL10
maintenance of protein location in nucleus (GO:0051457)	1/20	0.609447	0.865427	1.09413	0.541816	HNRNPU
microtubule nucleation (GO:0007020)	1/20	0.609447	0.865427	1.09413	0.541816	TPX2
myeloid cell development (GO:0061515)	1/20	0.609447	0.865427	1.09413	0.541816	MED1
organic cation transport (GO:0015695)	1/20	0.609447	0.865427	1.09413	0.541816	SLC25A26
positive regulation of cyclin-dependent protein kinase activity (GO:1904031)	1/20	0.609447	0.865427	1.09413	0.541816	CCND1
positive regulation of epidermal cell differentiation (GO:0045606)	1/20	0.609447	0.865427	1.09413	0.541816	MED1
positive regulation of lymphocyte differentiation (GO:0045621)	1/20	0.609447	0.865427	1.09413	0.541816	PPP2R3C
positive regulation of protein processing (GO:0010954)	1/20	0.609447	0.865427	1.09413	0.541816	MYH9
production of small RNA involved in gene silencing by RNA (GO:0070918)	1/20	0.609447	0.865427	1.09413	0.541816	MRPL44
negative regulation of transforming growth factor beta receptor signaling pathway (GO:0030512)	3/68	0.609475	0.865427	0.959243	0.474977	PDPK1;PIN1;UBA52
positive regulation of cellular component biogenesis (GO:0044089)	4/92	0.614608	0.872224	0.944599	0.459803	BCL2L11;TFRC;RPS3;BAK1
regulation of canonical Wnt signaling pathway (GO:0060828)	11/253	0.616269	0.874089	0.944172	0.457047	PSMA5;PSMA6;PSMC5;PSMA4;DDX3X;PSMD2;PSMC1;RUVBL2;DAPK3;PSMC2;PIN1
cellular response to radiation (GO:0071478)	2/45	0.618291	0.875478	0.966741	0.464805	ECT2;MAPK14
mitotic G2/M transition checkpoint (GO:0044818)	2/45	0.618291	0.875478	0.966741	0.464805	PLK1;NAE1
positive regulation of Notch signaling pathway (GO:0045747)	2/45	0.618291	0.875478	0.966741	0.464805	SNW1;STAT3
positive regulation of protein polymerization (GO:0032273)	3/69	0.619404	0.87656	0.94466	0.45249	NCKAP1;RPS3;MAPRE1
regulation of protein-containing complex assembly (GO:0043254)	5/116	0.62018	0.877167	0.93598	0.447159	BCL2L11;DDX3X;TFRC;RPS3;BAK1
actin nucleation (GO:0045010)	1/21	0.627391	0.880935	1.03937	0.484538	ACTR2
regulation of anoikis (GO:2000209)	1/21	0.627391	0.880935	1.03937	0.484538	MYBBP1A
regulation of cholesterol metabolic process (GO:0090181)	1/21	0.627391	0.880935	1.03937	0.484538	MBTPS1
regulation of lipopolysaccharide-mediated signaling pathway (GO:0031664)	1/21	0.627391	0.880935	1.03937	0.484538	CACTIN
retinol metabolic process (GO:0042572)	1/21	0.627391	0.880935	1.03937	0.484538	ADH7
innate immune response in mucosa (GO:0002227)	1/21	0.627391	0.880935	1.03937	0.484538	RPL39
intrinsic apoptotic signaling pathway in response to DNA damage by p53 class mediator (GO:0042771)	1/21	0.627391	0.880935	1.03937	0.484538	SNW1
zinc ion transport (GO:0006829)	1/21	0.627391	0.880935	1.03937	0.484538	SLC30A9
negative regulation of microtubule depolymerization (GO:0007026)	1/21	0.627391	0.880935	1.03937	0.484538	TPX2
negative regulation of protein localization to cell periphery (GO:1904376)	1/21	0.627391	0.880935	1.03937	0.484538	CLTC
negative regulation of protein localization to plasma membrane (GO:1903077)	1/21	0.627391	0.880935	1.03937	0.484538	CLTC
negative regulation of reproductive process (GO:2000242)	1/21	0.627391	0.880935	1.03937	0.484538	WDR77
positive regulation of phosphatase activity (GO:0010922)	1/21	0.627391	0.880935	1.03937	0.484538	MTOR
negative regulation of transcription by RNA polymerase II (GO:0000122)	30/684	0.628966	0.882654	0.951938	0.441393	CBFB;MAX;DDX20;HNRNPU;CTCF;PHB;HMGB1;ZBTB2;UXT;NIPBL;SIN3B;KAT5;CCND1;MYC;C1QBP;DMAP1;VHL;MTA2;TGIF1;MED1;DR1;EED;RPL23;PLK1;MBD2;STAT3;DRAP1;SNW1;YEATS2;UBA52
MAPK cascade (GO:0000165)	13/303	0.638333	0.891557	0.930829	0.417844	CHUK;WDR83;PSMA5;PSMA6;PSMC5;PSMA4;MYC;PSMD2;PSMC1;PSMC2;LAMTOR2;UBA52;LAMTOR3
fatty acid biosynthetic process (GO:0006633)	3/71	0.638741	0.891557	0.916779	0.410952	ACLY;OXSM;MCAT
Fc-gamma receptor signaling pathway involved in phagocytosis (GO:0038096)	3/71	0.638741	0.891557	0.916779	0.410952	NCKAP1;ACTR2;ACTB
phosphatidylinositol-mediated signaling (GO:0048015)	3/71	0.638741	0.891557	0.916779	0.410952	C1QBP;PIK3C2A;OGT
regulation of DNA binding (GO:0051101)	2/47	0.642009	0.891557	0.923678	0.409331	CSNK2B;HMGB1
epithelial to mesenchymal transition (GO:0001837)	2/47	0.642009	0.891557	0.923678	0.409331	TRIM28;ROCK2
regulation of T cell activation (GO:0050863)	2/47	0.642009	0.891557	0.923678	0.409331	PRELID1;HSPD1
telomere organization (GO:0032200)	2/47	0.642009	0.891557	0.923678	0.409331	RAD50;POLD1
regulation of chromosome organization (GO:0033044)	1/22	0.644512	0.891557	0.989822	0.434791	MYC
cell projection assembly (GO:0030031)	1/22	0.644512	0.891557	0.989822	0.434791	NCKAP1
cellular response to osmotic stress (GO:0071470)	1/22	0.644512	0.891557	0.989822	0.434791	DDX3X
regulation of lipid storage (GO:0010883)	1/22	0.644512	0.891557	0.989822	0.434791	FTO
regulation of response to cytokine stimulus (GO:0060759)	1/22	0.644512	0.891557	0.989822	0.434791	CBFB
fatty-acyl-CoA metabolic process (GO:0035337)	1/22	0.644512	0.891557	0.989822	0.434791	ACLY
female gonad development (GO:0008585)	1/22	0.644512	0.891557	0.989822	0.434791	EIF2B2
regulation of viral release from host cell (GO:1902186)	1/22	0.644512	0.891557	0.989822	0.434791	TRIM28
homologous chromosome segregation (GO:0045143)	1/22	0.644512	0.891557	0.989822	0.434791	PTTG1
limb morphogenesis (GO:0035108)	1/22	0.644512	0.891557	0.989822	0.434791	NIPBL
lipid droplet organization (GO:0034389)	1/22	0.644512	0.891557	0.989822	0.434791	RAB18
membrane protein intracellular domain proteolysis (GO:0031293)	1/22	0.644512	0.891557	0.989822	0.434791	MBTPS1
mitochondrial calcium ion homeostasis (GO:0051560)	1/22	0.644512	0.891557	0.989822	0.434791	LETM1
negative regulation of biomineral tissue development (GO:0070168)	1/22	0.644512	0.891557	0.989822	0.434791	ROCK2
negative regulation of interleukin-2 production (GO:0032703)	1/22	0.644512	0.891557	0.989822	0.434791	KAT5
negative regulation of phosphate metabolic process (GO:0045936)	1/22	0.644512	0.891557	0.989822	0.434791	PRKRIP1
osteoclast differentiation (GO:0030316)	1/22	0.644512	0.891557	0.989822	0.434791	MAPK14
positive regulation of amyloid precursor protein catabolic process (GO:1902993)	1/22	0.644512	0.891557	0.989822	0.434791	ROCK2
Fc-gamma receptor signaling pathway (GO:0038094)	3/72	0.648147	0.896094	0.903445	0.391767	NCKAP1;ACTR2;ACTB
regulation of transcription by RNA polymerase II (GO:0006357)	98/2206	0.65333	0.902262	0.962334	0.40964	CCNH;HNRNPU;CCNC;YEATS4;UXT;TRIM28;CCND1;KAT5;RUVBL2;MYC;CCNL1;MED1;SLC30A9;RPL23;HNF1B;MED4;MED7;WDR77;SUB1;KAT6A;UBA52;KMT2A;CBFB;MAX;NOP2;NRF1;PHB;HTATSF1;CIAO1;ZBTB2;MED31;RPRD1B;DMAP1;DR1;PLK1;SMARCA5;KTI12;DRAP1;FOSL1;CDK9;SNW1;TADA2A;COPS5;YEATS2;TADA3;PIN1;OGT;DDX3X;MED19;CHD4;CTCF;HMGB1;TRIAP1;MED15;MED12;MED14;NIPBL;MED13;SIN3B;MED10;C1QBP;MYBL2;PELP1;TGIF1;ACTR2;KLF13;CHUK;EED;ACTL6A;M…
regulation of interleukin-2 production (GO:0032663)	2/48	0.653425	0.902262	0.90355	0.384486	KAT5;RPS3
negative regulation of cell differentiation (GO:0045596)	8/191	0.654266	0.902262	0.907896	0.385168	SUZ12;MED1;PTBP1;METTL14;HNRNPU;WDR61;NELFB;FOXA2
negative regulation of Wnt signaling pathway (GO:0030178)	8/191	0.654266	0.902262	0.907896	0.385168	PSMA5;PSMA6;PSMC5;PSMA4;PSMD2;RUVBL2;PSMC1;PSMC2
endoplasmic reticulum organization (GO:0007029)	3/73	0.657379	0.902262	0.890492	0.373557	SEC61A1;RAB18;DNM1L
insulin receptor signaling pathway (GO:0008286)	3/73	0.657379	0.902262	0.890492	0.373557	ATP6V1G1;PIK3C2A;ATP6V1E1
artery development (GO:0060840)	1/23	0.660847	0.902262	0.94478	0.39136	HECTD1
regulation of B cell receptor signaling pathway (GO:0050855)	1/23	0.660847	0.902262	0.94478	0.39136	CBFB
blood vessel endothelial cell migration (GO:0043534)	1/23	0.660847	0.902262	0.94478	0.39136	MYH9
diacylglycerol metabolic process (GO:0046339)	1/23	0.660847	0.902262	0.94478	0.39136	PGS1
regulation of necroptotic process (GO:0060544)	1/23	0.660847	0.902262	0.94478	0.39136	OGT
DNA catabolic process, endonucleolytic (GO:0000737)	1/23	0.660847	0.902262	0.94478	0.39136	HMGB1
regulation of peptidase activity (GO:0052547)	1/23	0.660847	0.902262	0.94478	0.39136	NDUFA13
ear morphogenesis (GO:0042471)	1/23	0.660847	0.902262	0.94478	0.39136	NIPBL
ERK1 and ERK2 cascade (GO:0070371)	1/23	0.660847	0.902262	0.94478	0.39136	MYC
regulation of steroid metabolic process (GO:0019218)	1/23	0.660847	0.902262	0.94478	0.39136	LAMTOR1
regulation of telomere capping (GO:1904353)	1/23	0.660847	0.902262	0.94478	0.39136	RAD50
hexose transmembrane transport (GO:0008645)	1/23	0.660847	0.902262	0.94478	0.39136	SLC2A1
membrane protein ectodomain proteolysis (GO:0006509)	1/23	0.660847	0.902262	0.94478	0.39136	MYH9
vesicle transport along microtubule (GO:0047496)	1/23	0.660847	0.902262	0.94478	0.39136	PAFAH1B1
negative regulation of phosphoprotein phosphatase activity (GO:0032515)	1/23	0.660847	0.902262	0.94478	0.39136	ROCK2
positive regulation of interleukin-17 production (GO:0032740)	1/23	0.660847	0.902262	0.94478	0.39136	PHB
positive regulation of JUN kinase activity (GO:0043507)	1/23	0.660847	0.902262	0.94478	0.39136	RPS3
adherens junction organization (GO:0034332)	2/49	0.664548	0.903886	0.884279	0.361359	TBCD;ACTB
regulation of cellular protein metabolic process (GO:0032268)	2/49	0.664548	0.903886	0.884279	0.361359	EIF4E;METAP1
cellular response to mechanical stimulus (GO:0071260)	2/49	0.664548	0.903886	0.884279	0.361359	BCL10;BAK1
regulation of stress-activated MAPK cascade (GO:0032872)	2/49	0.664548	0.903886	0.884279	0.361359	COPS5;MYC
response to hydrogen peroxide (GO:0042542)	2/49	0.664548	0.903886	0.884279	0.361359	RPS3;ECT2
negative regulation of catabolic process (GO:0009895)	2/49	0.664548	0.903886	0.884279	0.361359	PIN1;PHB
positive regulation of reactive oxygen species metabolic process (GO:2000379)	2/49	0.664548	0.903886	0.884279	0.361359	ROMO1;MAPK14
regulation of cytokine-mediated signaling pathway (GO:0001959)	3/74	0.666434	0.904985	0.877903	0.356266	CHUK;CBFB;ABCE1
Fc receptor mediated stimulatory signaling pathway (GO:0002431)	3/74	0.666434	0.904985	0.877903	0.356266	NCKAP1;ACTR2;ACTB
negative regulation of protein binding (GO:0032091)	3/74	0.666434	0.904985	0.877903	0.356266	PIN1;ACTB;AURKA
positive regulation of I-kappaB kinase/NF-kappaB signaling (GO:0043123)	7/171	0.674339	0.909734	0.886362	0.349246	TFRC;CHUK;DDX21;BCL10;ECT2;GAPDH;BRD4
actin polymerization or depolymerization (GO:0008154)	2/50	0.675382	0.909734	0.865811	0.339811	WDR1;FLII
negative regulation of ERK1 and ERK2 cascade (GO:0070373)	2/50	0.675382	0.909734	0.865811	0.339811	PIN1;PHB
neuron migration (GO:0001764)	2/50	0.675382	0.909734	0.865811	0.339811	ELP3;PAFAH1B1
apoptotic nuclear changes (GO:0030262)	1/24	0.676432	0.909734	0.903656	0.353261	HMGB1
regulation of cardiac muscle hypertrophy (GO:0010611)	1/24	0.676432	0.909734	0.903656	0.353261	ROCK2
regulation of keratinocyte proliferation (GO:0010837)	1/24	0.676432	0.909734	0.903656	0.353261	MED1
regulation of monooxygenase activity (GO:0032768)	1/24	0.676432	0.909734	0.903656	0.353261	DNM2
negative regulation of neuron differentiation (GO:0045665)	1/24	0.676432	0.909734	0.903656	0.353261	MED1
negative regulation of NIK/NF-kappaB signaling (GO:1901223)	1/24	0.676432	0.909734	0.903656	0.353261	DDX3X
negative regulation of protein depolymerization (GO:1901880)	1/24	0.676432	0.909734	0.903656	0.353261	TPX2
peptidyl-glutamic acid modification (GO:0018200)	1/24	0.676432	0.909734	0.903656	0.353261	CFAP20
positive regulation of cellular response to transforming growth factor beta stimulus (GO:1903846)	1/24	0.676432	0.909734	0.903656	0.353261	SNW1
positive regulation of p38MAPK cascade (GO:1900745)	1/24	0.676432	0.909734	0.903656	0.353261	PRMT1
positive regulation of phospholipase activity (GO:0010518)	1/24	0.676432	0.909734	0.903656	0.353261	PDPK1
positive regulation of transforming growth factor beta receptor signaling pathway (GO:0030511)	1/24	0.676432	0.909734	0.903656	0.353261	SNW1
protein alpha-1,2-demannosylation (GO:0036508)	1/24	0.676432	0.909734	0.903656	0.353261	UBA52
protein exit from endoplasmic reticulum (GO:0032527)	1/24	0.676432	0.909734	0.903656	0.353261	RANGRF
regulation of transforming growth factor beta receptor signaling pathway (GO:0017015)	4/100	0.67942	0.913266	0.865518	0.334536	SNW1;PDPK1;PIN1;UBA52
water-soluble vitamin metabolic process (GO:0006767)	3/76	0.684017	0.918938	0.853762	0.324235	DHFR;SLC2A1;AASDHPPT
regulation of protein modification process (GO:0031399)	2/51	0.685929	0.918938	0.848097	0.319716	CDK9;PIN1
inositol lipid-mediated signaling (GO:0048017)	2/51	0.685929	0.918938	0.848097	0.319716	PIK3C2A;OGT
mesenchymal cell differentiation (GO:0048762)	2/51	0.685929	0.918938	0.848097	0.319716	TRIM28;ROCK2
mitotic nuclear membrane organization (GO:0101024)	2/51	0.685929	0.918938	0.848097	0.319716	SEH1L;VRK1
mitotic nuclear membrane reassembly (GO:0007084)	2/51	0.685929	0.918938	0.848097	0.319716	SEH1L;VRK1
regulation of nucleic acid-templated transcription (GO:1903506)	18/430	0.690052	0.918938	0.906311	0.336231	RNF20;PRMT5;TRRAP;DAPK3;STAT3;PHB;CDK11B;RPL6;HINFP;UBE2L3;DNM2;MED23;DRAP1;SBNO1;MYBBP1A;MYBL2;VHL;SRSF10
central nervous system development (GO:0007417)	11/268	0.690465	0.918938	0.888356	0.329038	NCKAP1;DHX30;COX7B;NIPBL;EIF2B2;STAT3;SLC2A1;RAB18;ELP3;SPATA5;ZPR1
cellular response to organic cyclic compound (GO:0071407)	6/150	0.691141	0.918938	0.865223	0.319623	MED1;KAT5;ROCK2;RUVBL2;ACTB;UBE2L3
protein quality control for misfolded or incompletely synthesized proteins (GO:0006515)	1/25	0.691301	0.918938	0.865958	0.319694	LONP1
receptor signaling pathway via STAT (GO:0097696)	1/25	0.691301	0.918938	0.865958	0.319694	STAT3
regulation of cardiac muscle cell action potential (GO:0098901)	1/25	0.691301	0.918938	0.865958	0.319694	RANGRF
regulation of cholesterol transport (GO:0032374)	1/25	0.691301	0.918938	0.865958	0.319694	LAMTOR1
regulation of microtubule depolymerization (GO:0031114)	1/25	0.691301	0.918938	0.865958	0.319694	TPX2
regulation of myotube differentiation (GO:0010830)	1/25	0.691301	0.918938	0.865958	0.319694	MAPK14
regulation of rhodopsin mediated signaling pathway (GO:0022400)	1/25	0.691301	0.918938	0.865958	0.319694	METAP1
negative regulation of cell junction assembly (GO:1901889)	1/25	0.691301	0.918938	0.865958	0.319694	ROCK2
negative regulation of response to endoplasmic reticulum stress (GO:1903573)	1/25	0.691301	0.918938	0.865958	0.319694	OPA1
negative regulation of sequestering of calcium ion (GO:0051283)	1/25	0.691301	0.918938	0.865958	0.319694	CHERP
peroxisome organization (GO:0007031)	1/25	0.691301	0.918938	0.865958	0.319694	DNM1L
positive regulation of lipid metabolic process (GO:0045834)	1/25	0.691301	0.918938	0.865958	0.319694	MTOR
purine ribonucleotide metabolic process (GO:0009150)	3/77	0.692546	0.920107	0.84218	0.309401	ACLY;OPA1;OXSM
fatty acid beta-oxidation (GO:0006635)	2/52	0.696194	0.922521	0.831092	0.300961	HSD17B10;MCAT
negative regulation of protein-containing complex assembly (GO:0031333)	2/52	0.696194	0.922521	0.831092	0.300961	DDX3X;HMGB1
plasma membrane bounded cell projection morphogenesis (GO:0120039)	2/52	0.696194	0.922521	0.831092	0.300961	NCKAP1;DNM2
positive regulation of protein localization to cell periphery (GO:1904377)	2/52	0.696194	0.922521	0.831092	0.300961	PDPK1;RANGRF
positive regulation of protein localization to plasma membrane (GO:1903078)	2/52	0.696194	0.922521	0.831092	0.300961	PDPK1;RANGRF
regulation of macromolecule metabolic process (GO:0060255)	8/200	0.703749	0.923126	0.864927	0.303878	ROCK2;MYC;C1D;PIN1;CTCF;LAMTOR1;CACTIN;HINFP
regulation of I-kappaB kinase/NF-kappaB signaling (GO:0043122)	9/224	0.705037	0.923126	0.868846	0.303666	TFRC;CHUK;PDPK1;DDX21;BCL10;CACTIN;ECT2;GAPDH;BRD4
purine-containing compound biosynthetic process (GO:0072522)	1/26	0.705488	0.923126	0.831276	0.290003	GMPS
regulation of actin filament bundle assembly (GO:0032231)	1/26	0.705488	0.923126	0.831276	0.290003	ROCK2
regulation of biomineral tissue development (GO:0070167)	1/26	0.705488	0.923126	0.831276	0.290003	ROCK2
regulation of mitotic metaphase/anaphase transition (GO:0030071)	1/26	0.705488	0.923126	0.831276	0.290003	PLK1
regulation of monocyte chemotaxis (GO:0090025)	1/26	0.705488	0.923126	0.831276	0.290003	HMGB1
regulation of myelination (GO:0031641)	1/26	0.705488	0.923126	0.831276	0.290003	ZPR1
DNA modification (GO:0006304)	1/26	0.705488	0.923126	0.831276	0.290003	EXOSC4
regulation of protein insertion into mitochondrial membrane involved in apoptotic signaling pathway (GO:1900739)	1/26	0.705488	0.923126	0.831276	0.290003	TFDP1
regulation of regulatory T cell differentiation (GO:0045589)	1/26	0.705488	0.923126	0.831276	0.290003	CBFB
histone lysine demethylation (GO:0070076)	1/26	0.705488	0.923126	0.831276	0.290003	KDM8
retinoic acid metabolic process (GO:0042573)	1/26	0.705488	0.923126	0.831276	0.290003	ADH7
metanephros development (GO:0001656)	1/26	0.705488	0.923126	0.831276	0.290003	NIPBL
mononuclear cell differentiation (GO:1903131)	1/26	0.705488	0.923126	0.831276	0.290003	MYH9
negative regulation of protein localization to membrane (GO:1905476)	1/26	0.705488	0.923126	0.831276	0.290003	CLTC
negative regulation of protein transport (GO:0051224)	1/26	0.705488	0.923126	0.831276	0.290003	DPH3
positive regulation of interleukin-2 production (GO:0032743)	1/26	0.705488	0.923126	0.831276	0.290003	RPS3
positive regulation of ion transmembrane transporter activity (GO:0032414)	1/26	0.705488	0.923126	0.831276	0.290003	COX17
positive regulation of protein insertion into mitochondrial membrane involved in apoptotic signaling pathway (GO:1900740)	1/26	0.705488	0.923126	0.831276	0.290003	TFDP1
bicellular tight junction assembly (GO:0070830)	2/53	0.706179	0.923126	0.814753	0.283442	TBCD;ECT2
regulation of immune effector process (GO:0002697)	2/53	0.706179	0.923126	0.814753	0.283442	C1QBP;PHB2
negative regulation of cysteine-type endopeptidase activity (GO:2000117)	2/53	0.706179	0.923126	0.814753	0.283442	DDX3X;TRIAP1
positive regulation of B cell activation (GO:0050871)	2/53	0.706179	0.923126	0.814753	0.283442	TFRC;PPP2R3C
positive regulation of chemokine production (GO:0032722)	2/53	0.706179	0.923126	0.814753	0.283442	DDX3X;HMGB1
positive regulation of macroautophagy (GO:0016239)	2/53	0.706179	0.923126	0.814753	0.283442	VPS13D;VDAC1
positive regulation of developmental process (GO:0051094)	7/177	0.708593	0.925477	0.854807	0.294459	TFRC;C1QBP;RBM19;VHL;DNM1L;AURKA;FOXA2
cellular metal ion homeostasis (GO:0006875)	4/104	0.708827	0.925477	0.830722	0.285888	LETM1;ATP2B1;TPT1;CHERP
axon development (GO:0061564)	3/79	0.70908	0.925477	0.819931	0.281882	DHFR;ACTB;ZPR1
cellular response to insulin stimulus (GO:0032869)	5/129	0.711291	0.927883	0.837279	0.285239	ATP6V1G1;PKM;PDPK1;ATP6V1E1;PIK3C2A
positive regulation of cellular metabolic process (GO:0031325)	4/105	0.715863	0.928355	0.822454	0.274919	ACLY;PRELID1;ROMO1;MAPK14
regulation of focal adhesion assembly (GO:0051893)	2/54	0.715888	0.928355	0.799043	0.267065	ROCK2;DAPK3
regulation of humoral immune response (GO:0002920)	2/54	0.715888	0.928355	0.799043	0.267065	C1QBP;PHB2
regulation of proteasomal protein catabolic process (GO:0061136)	2/54	0.715888	0.928355	0.799043	0.267065	PSMC5;PSMC2
nuclear membrane reassembly (GO:0031468)	2/54	0.715888	0.928355	0.799043	0.267065	SEH1L;VRK1
positive regulation of leukocyte chemotaxis (GO:0002690)	2/54	0.715888	0.928355	0.799043	0.267065	C1QBP;HMGB1
glycerophospholipid metabolic process (GO:0006650)	3/80	0.717087	0.928355	0.80924	0.26912	PIGW;CRLS1;PAFAH1B1
regulation of blood coagulation (GO:0030193)	1/27	0.719024	0.928355	0.799262	0.263645	FOXA2
regulation of cardiac muscle cell contraction (GO:0086004)	1/27	0.719024	0.928355	0.799262	0.263645	RANGRF
bile acid biosynthetic process (GO:0006699)	1/27	0.719024	0.928355	0.799262	0.263645	HSD17B10
cellular response to cadmium ion (GO:0071276)	1/27	0.719024	0.928355	0.799262	0.263645	CHUK
regulation of toll-like receptor signaling pathway (GO:0034121)	1/27	0.719024	0.928355	0.799262	0.263645	CACTIN
negative regulation of endothelial cell apoptotic process (GO:2000352)	1/27	0.719024	0.928355	0.799262	0.263645	PDPK1
negative regulation of plasma membrane bounded cell projection assembly (GO:0120033)	1/27	0.719024	0.928355	0.799262	0.263645	CAPZB
nucleobase-containing small molecule interconversion (GO:0015949)	1/27	0.719024	0.928355	0.799262	0.263645	TYMS
positive regulation of calcium ion transmembrane transport (GO:1904427)	1/27	0.719024	0.928355	0.799262	0.263645	PDPK1
positive regulation of mitotic cell cycle (GO:0045931)	1/27	0.719024	0.928355	0.799262	0.263645	EIF4E
positive regulation of muscle cell differentiation (GO:0051149)	1/27	0.719024	0.928355	0.799262	0.263645	MAPK14
positive regulation of nuclear division (GO:0051785)	1/27	0.719024	0.928355	0.799262	0.263645	AURKA
positive regulation of striated muscle cell differentiation (GO:0051155)	1/27	0.719024	0.928355	0.799262	0.263645	MAPK14
positive regulation of protein serine/threonine kinase activity (GO:0071902)	4/106	0.722774	0.932719	0.814348	0.264385	RPTOR;DDX3X;CCND1;TELO2
positive regulation of tumor necrosis factor superfamily cytokine production (GO:1903557)	3/81	0.724922	0.935011	0.798823	0.256975	STAT3;HMGB1;BCL10
negative regulation of cysteine-type endopeptidase activity involved in apoptotic process (GO:0043154)	2/55	0.725327	0.935055	0.783925	0.251744	DDX3X;TRIAP1
negative regulation of nucleic acid-templated transcription (GO:1903507)	19/464	0.728402	0.935915	0.885136	0.280502	NDUFA13;SET;EED;KDM8;MBD2;CTCF;PHB;PHB2;HINFP;NIPBL;BTAF1;SNW1;MYBBP1A;YEATS2;KAT5;TRIM28;KAT6A;BIRC5;DMAP1
carbohydrate derivative biosynthetic process (GO:1901137)	1/28	0.731938	0.935915	0.769619	0.240167	TPI1
cellular zinc ion homeostasis (GO:0006882)	1/28	0.731938	0.935915	0.769619	0.240167	SLC30A9
regulation of insulin secretion involved in cellular response to glucose stimulus (GO:0061178)	1/28	0.731938	0.935915	0.769619	0.240167	FOXA2
cytosolic calcium ion transport (GO:0060401)	1/28	0.731938	0.935915	0.769619	0.240167	ATP2B1
regulation of muscle contraction (GO:0006937)	1/28	0.731938	0.935915	0.769619	0.240167	DAPK3
regulation of neuron migration (GO:2001222)	1/28	0.731938	0.935915	0.769619	0.240167	NIPBL
regulation of sodium ion transmembrane transport (GO:1902305)	1/28	0.731938	0.935915	0.769619	0.240167	RANGRF
GPI anchor metabolic process (GO:0006505)	1/28	0.731938	0.935915	0.769619	0.240167	PIGW
sarcomere organization (GO:0045214)	1/28	0.731938	0.935915	0.769619	0.240167	WDR1
macromolecule catabolic process (GO:0009057)	1/28	0.731938	0.935915	0.769619	0.240167	MTOR
mucosal immune response (GO:0002385)	1/28	0.731938	0.935915	0.769619	0.240167	RPL39
positive regulation of fibroblast proliferation (GO:0048146)	1/28	0.731938	0.935915	0.769619	0.240167	MYC
positive regulation of monooxygenase activity (GO:0032770)	1/28	0.731938	0.935915	0.769619	0.240167	DHFR
protein localization to Golgi apparatus (GO:0034067)	1/28	0.731938	0.935915	0.769619	0.240167	VPS13D
protein localization to lysosome (GO:0061462)	1/28	0.731938	0.935915	0.769619	0.240167	LAMTOR4
regulation of G protein-coupled receptor signaling pathway (GO:0008277)	3/82	0.732586	0.936268	0.78867	0.245414	ROCK2;PHB;METAP1
negative regulation of transcription, DNA-templated (GO:0045892)	40/948	0.73405	0.936811	0.911864	0.281929	NDUFA13;SET;CBFB;MAX;KDM8;DDX20;HNRNPU;CTCF;HMGB1;PHB;PHB2;ZBTB2;UXT;NIPBL;BTAF1;TRIM28;CCND1;SIN3B;KAT5;MYC;C1QBP;VHL;DMAP1;MTA2;TGIF1;MED1;DR1;EED;RPL23;MBD2;STAT3;PLK1;HINFP;DRAP1;SNW1;MYBBP1A;YEATS2;KAT6A;BIRC5;UBA52
protein-containing complex disassembly (GO:0032984)	2/56	0.734499	0.936811	0.769368	0.237402	MYC;RPL23
sensory organ development (GO:0007423)	2/56	0.734499	0.936811	0.769368	0.237402	SCO2;RAB18
tight junction assembly (GO:0120192)	2/56	0.734499	0.936811	0.769368	0.237402	TBCD;ECT2
dicarboxylic acid metabolic process (GO:0043648)	2/57	0.743408	0.941159	0.755339	0.223966	DHFR;ACLY
aggrephagy (GO:0035973)	1/29	0.744259	0.941159	0.742094	0.219189	UBA52
regulation of actin polymerization or depolymerization (GO:0008064)	1/29	0.744259	0.941159	0.742094	0.219189	WDR1
regulation of DNA biosynthetic process (GO:2000278)	1/29	0.744259	0.941159	0.742094	0.219189	MYC
regulation of double-strand break repair via nonhomologous end joining (GO:2001032)	1/29	0.744259	0.941159	0.742094	0.219189	ACTR2
regulation of fatty acid biosynthetic process (GO:0042304)	1/29	0.744259	0.941159	0.742094	0.219189	EIF6
regulation of gluconeogenesis (GO:0006111)	1/29	0.744259	0.941159	0.742094	0.219189	OGT
determination of bilateral symmetry (GO:0009855)	1/29	0.744259	0.941159	0.742094	0.219189	STIL
glial cell differentiation (GO:0010001)	1/29	0.744259	0.941159	0.742094	0.219189	STAT3
response to cadmium ion (GO:0046686)	1/29	0.744259	0.941159	0.742094	0.219189	CHUK
mismatch repair (GO:0006298)	1/29	0.744259	0.941159	0.742094	0.219189	POLD1
negative regulation of epithelial to mesenchymal transition (GO:0010719)	1/29	0.744259	0.941159	0.742094	0.219189	FOXA2
negative regulation of myeloid leukocyte differentiation (GO:0002762)	1/29	0.744259	0.941159	0.742094	0.219189	MYC
negative regulation of transferase activity (GO:0051348)	1/29	0.744259	0.941159	0.742094	0.219189	HNRNPU
positive regulation of extrinsic apoptotic signaling pathway (GO:2001238)	1/29	0.744259	0.941159	0.742094	0.219189	BCL10
production of miRNAs involved in gene silencing by miRNA (GO:0035196)	1/29	0.744259	0.941159	0.742094	0.219189	MRPL44
protein K11-linked ubiquitination (GO:0070979)	1/29	0.744259	0.941159	0.742094	0.219189	UBE2L3
vascular transport (GO:0010232)	3/84	0.747408	0.942773	0.769116	0.223923	SLC16A1;TFRC;SLC2A1
regulation of interleukin-6 production (GO:0032675)	4/110	0.749166	0.942773	0.783452	0.226257	STAT3;BCL10;HMGB1;HSPD1
response to endoplasmic reticulum stress (GO:0034976)	4/110	0.749166	0.942773	0.783452	0.226257	MBTPS1;BCL2L11;AIFM1;BAK1
endoplasmic reticulum to Golgi vesicle-mediated transport (GO:0006888)	7/185	0.750395	0.942773	0.816044	0.234331	DCTN6;DCTN5;COPA;CAPZB;COPB1;RANGRF;YKT6
chordate embryonic development (GO:0043009)	2/58	0.752061	0.942773	0.741812	0.211371	STIL;HINFP
regulation of pathway-restricted SMAD protein phosphorylation (GO:0060393)	2/58	0.752061	0.942773	0.741812	0.211371	CSNK2B;PIN1
[truncated: 521 more rows]

## Sheet: Supplementary Data 1e
Supplementary Data 1e. GO term enrichment analysis of depleted genes.
Term	Overlap	P-value	Adjusted P-value	Odds Ratio	Combined Score	Genes
negative regulation of TOR signaling (GO:0032007)	6/38	2.71003e-08	2.72629e-05	40.943	713.379	STK11;NPRL2;NPRL3;TSC2;TSC1;DEPDC5
negative regulation of extrinsic apoptotic signaling pathway (GO:2001237)	6/80	2.50428e-06	0.00125965	17.6677	227.869	CASP8;BCL2;SNAI2;TRAF2;CFLAR;MCL1
negative regulation of intracellular signal transduction (GO:1902532)	8/198	5.45042e-06	0.00182771	9.32608	113.03	CASP8;NPRL2;NPRL3;BCL2;TSC2;TSC1;DEPDC5;MCL1
negative regulation of autophagy (GO:0010507)	5/59	9.84036e-06	0.00207242	19.9769	230.313	TLK2;BCL2;TSC1;EIF4G2;MCL1
intrinsic apoptotic signaling pathway (GO:0097193)	6/102	1.03003e-05	0.00207242	13.6037	156.216	STK11;CUL5;BCL2;TRAF2;PPM1F;MCL1
regulation of autophagy (GO:0010506)	8/231	1.676e-05	0.0028101	7.93269	87.2319	STK11;NPRL2;BCL2;TLK2;KEAP1;DEPDC5;EIF4G2;MCL1
regulation of TOR signaling (GO:0032006)	5/71	2.44434e-05	0.00351287	16.3348	173.462	NPRL2;NPRL3;TSC2;TSC1;DEPDC5
negative regulation of anoikis (GO:2000811)	3/16	5.91553e-05	0.00743878	48.8298	475.375	BCL2;SNAI2;MCL1
regulation of anoikis (GO:2000209)	3/21	0.000138043	0.0153018	35.2571	313.363	BCL2;SNAI2;MCL1
regulation of tumor necrosis factor-mediated signaling pathway (GO:0010803)	4/58	0.00018046	0.0153018	15.8096	136.279	CASP8;SHARPIN;TRAF2;CFLAR
negative regulation of extrinsic apoptotic signaling pathway in absence of ligand (GO:2001240)	3/23	0.000182526	0.0153018	31.7282	273.136	BCL2;SNAI2;MCL1
negative regulation of signal transduction in absence of ligand (GO:1901099)	3/23	0.000182526	0.0153018	31.7282	273.136	BCL2;SNAI2;MCL1
negative regulation of intrinsic apoptotic signaling pathway (GO:2001243)	4/64	0.000264315	0.0204539	14.2244	117.186	DNAJA1;BCL2;SNAI2;MCL1
positive regulation of cysteine-type endopeptidase activity involved in apoptotic process (GO:0043280)	5/119	0.000285487	0.0205143	9.43412	76.9948	CASP8;TRAF2;CFLAR;PPM1F;SENP1
regulation of extrinsic apoptotic signaling pathway in absence of ligand (GO:2001239)	3/28	0.000331755	0.0208916	25.3762	203.291	BCL2;SNAI2;MCL1
regulation of translational initiation (GO:0006446)	4/68	0.000333805	0.0208916	13.3327	106.727	CSDE1;AGO2;EIF3H;EIF4G2
negative regulation of cellular catabolic process (GO:0031330)	4/69	0.000353039	0.0208916	13.1269	104.345	TLK2;BCL2;EIF4G2;MCL1
extrinsic apoptotic signaling pathway (GO:0097191)	4/72	0.000415495	0.0232216	12.5459	97.6825	CASP8;BCL2;TRAF2;MCL1
regulation of cytokine-mediated signaling pathway (GO:0001959)	4/74	0.000461277	0.0233459	12.1862	93.6082	CASP8;SHARPIN;TRAF2;CFLAR
death-inducing signaling complex assembly (GO:0071550)	2/7	0.000481203	0.0233459	83.7811	640.022	CASP8;TRAF2
positive regulation of growth (GO:0045927)	4/76	0.000510547	0.0233459	11.8465	89.7966	CSNK2A1;BCL2;PPM1F;EIF4G2
protein import into nucleus (GO:0006606)	4/76	0.000510547	0.0233459	11.8465	89.7966	RPAIN;TSC2;KPNA4;KPNB1
negative regulation of apoptotic signaling pathway (GO:2001234)	4/78	0.000563453	0.0246449	11.5251	86.2245	CSNK2A1;BCL2;CFLAR;MCL1
negative regulation of extrinsic apoptotic signaling pathway via death domain receptors (GO:1902042)	3/34	0.000593355	0.0248714	20.4585	152.001	CASP8;TRAF2;CFLAR
activation of cysteine-type endopeptidase activity involved in apoptotic process (GO:0006919)	4/81	0.000649952	0.0259306	11.0744	81.271	CASP8;TRAF2;CFLAR;SENP1
platelet aggregation (GO:0070527)	3/36	0.000703029	0.0259306	19.2166	139.515	GNAS;ILK;VCL
spindle assembly (GO:0051225)	4/84	0.00074547	0.0259306	10.6575	76.7501	NCOR1;STAG2;AAAS;KPNB1
regulation of I-kappaB kinase/NF-kappaB signaling (GO:0043122)	6/224	0.000781287	0.0259306	5.95373	42.5963	SHARPIN;CASP8;TRAF3;UBE2N;TRAF2;CFLAR
anoikis (GO:0043276)	2/9	0.000819717	0.0259306	59.8376	425.239	STK11;TSC2
endosome to melanosome transport (GO:0035646)	2/9	0.000819717	0.0259306	59.8376	425.239	AP3D1;AP1M1
endosome to pigment granule transport (GO:0043485)	2/9	0.000819717	0.0259306	59.8376	425.239	AP3D1;AP1M1
negative regulation of ubiquitin-dependent protein catabolic process (GO:2000059)	3/38	0.000824831	0.0259306	18.1167	128.635	CSNK2A1;TLK2;EIF3H
negative regulation of establishment of protein localization (GO:1904950)	2/10	0.00102141	0.0302217	52.3553	360.548	DNAJA1;PPM1F
methylguanosine-cap decapping (GO:0110156)	2/10	0.00102141	0.0302217	52.3553	360.548	EDC4;LSM1
regulation of extrinsic apoptotic signaling pathway via death domain receptors (GO:1902041)	3/42	0.00110683	0.0318134	16.2553	110.638	CASP8;TRAF2;CFLAR
homotypic cell-cell adhesion (GO:0034109)	3/44	0.00126799	0.0335683	15.4608	103.129	GNAS;ILK;VCL
mitotic spindle assembly (GO:0090307)	3/44	0.00126799	0.0335683	15.4608	103.129	STAG2;AAAS;KPNB1
protein K63-linked ubiquitination (GO:0070534)	3/44	0.00126799	0.0335683	15.4608	103.129	TRAF3;UBE2N;TRAF2
cellular protein modification process (GO:0006464)	13/1025	0.00133404	0.0341154	2.88894	19.1235	UBE2F;CSNK2A1;WSB2;CUL5;DYRK1A;PIK3R4;KEAP1;ILK;SIRT6;RNF7;PPM1F;STK11;TLK2
negative regulation of cellular macromolecule biosynthetic process (GO:2000113)	9/547	0.00135648	0.0341154	3.68125	24.3068	HEXIM1;NCOR1;ZEB1;SFMBT1;RFX3;SAP18;TSC1;BCOR;PPM1F
positive regulation of I-kappaB kinase/NF-kappaB signaling (GO:0043123)	5/171	0.00147343	0.0361528	6.46183	42.1322	SHARPIN;CASP8;UBE2N;TRAF2;CFLAR
protein neddylation (GO:0045116)	2/13	0.00175374	0.0410293	38.0708	241.598	UBE2F;RNF7
positive regulation of vascular endothelial cell proliferation (GO:1905564)	2/13	0.00175374	0.0410293	38.0708	241.598	SP1;SIRT6
negative regulation of nucleic acid-templated transcription (GO:1903507)	8/464	0.00188319	0.0430565	3.83343	24.054	HEXIM1;NCOR1;ZEB1;SFMBT1;RFX3;SAP18;BCOR;PPM1F
negative regulation of DNA damage response, signal transduction by p53 class mediator (GO:0043518)	2/14	0.00203957	0.0446046	34.8965	216.184	DYRK1A;SNAI2
negative regulation of TORC1 signaling (GO:1904262)	2/14	0.00203957	0.0446046	34.8965	216.184	STK11;DEPDC5
negative regulation of transcription, DNA-templated (GO:0045892)	12/948	0.00209545	0.0448516	2.86078	17.6453	HEXIM1;NCOR1;ZEB1;NCOA5;SFMBT1;CNOT2;RFX3;SNAI2;SAP18;SIRT6;BCOR;PPM1F
regulation of focal adhesion assembly (GO:0051893)	3/54	0.00229309	0.0480594	12.423	75.5054	TSC1;VCL;PPM1F
nuclear-transcribed mRNA catabolic process, deadenylation-dependent decay (GO:0000288)	3/56	0.00254482	0.0522467	11.953	71.4038	EDC4;CNOT2;LSM1
regulation of defense response to virus (GO:0050688)	2/16	0.00267262	0.0527188	29.9083	177.197	TRAF3;PCBP2
N-terminal protein amino acid acetylation (GO:0006474)	2/16	0.00267262	0.0527188	29.9083	177.197	NAA30;NAA35
circulatory system development (GO:0072359)	4/126	0.00331303	0.0621902	6.97374	39.8193	STK11;CASP8;TSC2;BCOR
negative regulation of signal transduction by p53 class mediator (GO:1901797)	2/18	0.00338616	0.0621902	26.1671	148.84	DYRK1A;SNAI2
regulation of vascular endothelial cell proliferation (GO:1905562)	2/18	0.00338616	0.0621902	26.1671	148.84	SP1;SIRT6
negative regulation of kinase activity (GO:0033673)	3/62	0.00340006	0.0621902	10.7342	61.0129	NPRL2;TSC2;PPM1F
regulation of extrinsic apoptotic signaling pathway (GO:2001236)	3/64	0.0037196	0.0643263	10.3812	58.0741	CASP8;TRAF2;CFLAR
regulation of histone H3-K4 methylation (GO:0051569)	2/19	0.00377262	0.0643263	24.6266	137.416	PAXIP1;BCOR
NLS-bearing protein import into nucleus (GO:0006607)	2/19	0.00377262	0.0643263	24.6266	137.416	KPNA4;KPNB1
positive regulation of focal adhesion assembly (GO:0051894)	2/19	0.00377262	0.0643263	24.6266	137.416	TSC1;PPM1F
regulation of programmed necrotic cell death (GO:0062098)	2/20	0.00417861	0.0700613	23.2573	127.398	CASP8;CFLAR
extrinsic apoptotic signaling pathway in absence of ligand (GO:0097192)	2/21	0.00460393	0.0747025	22.0321	118.551	BCL2;MCL1
stress granule assembly (GO:0034063)	2/21	0.00460393	0.0747025	22.0321	118.551	CSDE1;PRRC2C
regulation of vacuole organization (GO:0044088)	2/22	0.0050484	0.0795474	20.9295	110.689	NPRL2;NPRL3
positive regulation of intracellular signal transduction (GO:1902533)	8/546	0.00506067	0.0795474	3.23545	17.1034	HEXIM1;SHARPIN;CASP8;BCL2;UBE2N;ILK;TRAF2;CFLAR
apoptotic process (GO:0006915)	5/231	0.00536459	0.0826851	4.73187	24.7379	STK11;CASP8;BCL2;TSC2;CFLAR
regulation of necroptotic process (GO:0060544)	2/23	0.00551182	0.0826851	19.9318	103.663	CASP8;CFLAR
cellular response to amino acid starvation (GO:0034198)	3/74	0.00558905	0.0826851	8.91459	46.2395	NPRL2;NPRL3;DEPDC5
mitotic nuclear division (GO:0140014)	3/74	0.00558905	0.0826851	8.91459	46.2395	STAG2;AAAS;KPNB1
response to amino acid starvation (GO:1990928)	3/75	0.0058017	0.0841008	8.79034	45.2668	NPRL2;NPRL3;DEPDC5
nucleotide-binding domain, leucine rich repeat containing receptor signaling pathway (GO:0035872)	2/24	0.00599399	0.0841008	19.0249	97.3503	CASP8;UBE2N
positive regulation of cell-substrate junction organization (GO:0150117)	2/24	0.00599399	0.0841008	19.0249	97.3503	TSC1;PPM1F
establishment of protein localization to organelle (GO:0072594)	3/76	0.00601915	0.0841008	8.66948	44.3254	RPAIN;TSC2;KPNB1
import into nucleus (GO:0051170)	3/77	0.00624141	0.0860118	8.5519	43.4141	RPAIN;TSC2;KPNB1
negative regulation of intrinsic apoptotic signaling pathway in response to DNA damage (GO:1902230)	2/26	0.00701388	0.0916359	17.4377	86.4887	BCL2;SNAI2
negative regulation of macroautophagy (GO:0016242)	2/26	0.00701388	0.0916359	17.4377	86.4887	TSC2;TSC1
regulation of protein insertion into mitochondrial membrane involved in apoptotic signaling pathway (GO:1900739)	2/26	0.00701388	0.0916359	17.4377	86.4887	CASP8;BCL2
positive regulation of protein insertion into mitochondrial membrane involved in apoptotic signaling pathway (GO:1900740)	2/26	0.00701388	0.0916359	17.4377	86.4887	CASP8;BCL2
cellular response to starvation (GO:0009267)	4/158	0.00735731	0.0948904	5.51571	27.0935	NPRL2;NPRL3;PIK3R4;DEPDC5
cytoplasmic pattern recognition receptor signaling pathway (GO:0002753)	2/27	0.00755121	0.0949565	16.7394	81.7893	CASP8;UBE2N
melanosome organization (GO:0032438)	2/27	0.00755121	0.0949565	16.7394	81.7893	AP3D1;AP1M1
regulation of DNA damage response, signal transduction by p53 class mediator (GO:0043516)	2/28	0.00810656	0.0970857	16.0947	77.4975	DYRK1A;SNAI2
nucleotide-binding oligomerization domain containing signaling pathway (GO:0070423)	2/28	0.00810656	0.0970857	16.0947	77.4975	CASP8;UBE2N
regulation of protein transport (GO:0051223)	2/28	0.00810656	0.0970857	16.0947	77.4975	DNAJA1;PPM1F
positive regulation of phosphatidylinositol 3-kinase activity (GO:0043552)	2/28	0.00810656	0.0970857	16.0947	77.4975	PIK3R4;AMBRA1
regulation of response to biotic stimulus (GO:0002831)	2/29	0.00867973	0.100832	15.4979	73.5647	CASP8;TRAF3
intrinsic apoptotic signaling pathway in response to endoplasmic reticulum stress (GO:0070059)	2/29	0.00867973	0.100832	15.4979	73.5647	BCL2;TRAF2
extrinsic apoptotic signaling pathway via death domain receptors (GO:0008625)	2/30	0.00927055	0.100832	14.9436	69.9497	CASP8;BCL2
histone H3-K4 methylation (GO:0051568)	2/30	0.00927055	0.100832	14.9436	69.9497	KMT2D;PAXIP1
positive regulation of lipid kinase activity (GO:0090218)	2/30	0.00927055	0.100832	14.9436	69.9497	PIK3R4;AMBRA1
positive regulation of phosphate metabolic process (GO:0045937)	2/30	0.00927055	0.100832	14.9436	69.9497	PTGES3;ILK
TRIF-dependent toll-like receptor signaling pathway (GO:0035666)	2/30	0.00927055	0.100832	14.9436	69.9497	CASP8;TRAF3
protein import (GO:0017038)	3/89	0.00929404	0.100832	7.35416	34.4055	RPAIN;TSC2;KPNB1
negative regulation of apoptotic process (GO:0043066)	7/485	0.00932143	0.100832	3.16074	14.7778	DNAJA1;CSNK2A1;BCL2;SNAI2;NAA35;CFLAR;MCL1
positive regulation of autophagy (GO:0010508)	3/90	0.00958123	0.101409	7.26926	33.7871	STK11;NPRL2;TSC2
toll-like receptor signaling pathway (GO:0002224)	3/91	0.00987356	0.101409	7.18629	33.1855	CASP8;TRAF3;PIK3R4
negative regulation of proteasomal ubiquitin-dependent protein catabolic process (GO:0032435)	2/31	0.00987884	0.101409	14.4276	66.6174	TLK2;EIF3H
negative regulation of response to DNA damage stimulus (GO:2001021)	2/31	0.00987884	0.101409	14.4276	66.6174	DYRK1A;SNAI2
MyD88-independent toll-like receptor signaling pathway (GO:0002756)	2/31	0.00987884	0.101409	14.4276	66.6174	CASP8;TRAF3
negative regulation of intracellular steroid hormone receptor signaling pathway (GO:0033144)	2/32	0.0105044	0.104803	13.946	63.5373	NCOR1;CNOT2
regulation of intracellular estrogen receptor signaling pathway (GO:0033146)	2/32	0.0105044	0.104803	13.946	63.5373	KMT2D;CNOT2
regulation of translation (GO:0006417)	4/178	0.0110649	0.104803	4.87678	21.9649	CSDE1;EIF3H;TSC1;EIF4G2
mRNA metabolic process (GO:0016071)	3/95	0.0110946	0.104803	6.87246	30.9349	CSTF3;PCBP2;SRSF5
protein modification by small protein removal (GO:0070646)	5/276	0.0111061	0.104803	3.93711	17.718	TRAF3;USP34;KEAP1;TRAF2;SENP1
negative regulation of JNK cascade (GO:0046329)	2/33	0.0111471	0.104803	13.4954	60.6832	DNAJA1;NCOR1
exonucleolytic catabolism of deadenylated mRNA (GO:0043928)	2/33	0.0111471	0.104803	13.4954	60.6832	EDC4;LSM1
positive regulation of histone modification (GO:0031058)	2/33	0.0111471	0.104803	13.4954	60.6832	PAXIP1;UBE2N
signal transduction by p53 class mediator (GO:0072331)	2/33	0.0111471	0.104803	13.4954	60.6832	STK11;PAXIP1
histone lysine methylation (GO:0034968)	2/34	0.0118067	0.108968	13.073	58.0323	KMT2D;PAXIP1
positive regulation of mitochondrial outer membrane permeabilization involved in apoptotic signaling pathway (GO:1901030)	2/34	0.0118067	0.108968	13.073	58.0323	CASP8;BCL2
regulation of autophagosome assembly (GO:2000785)	2/35	0.0124831	0.110158	12.6762	55.5648	NPRL2;NPRL3
regulation of JUN kinase activity (GO:0043506)	2/35	0.0124831	0.110158	12.6762	55.5648	DNAJA1;TRAF2
nuclear-transcribed mRNA catabolic process, exonucleolytic (GO:0000291)	2/35	0.0124831	0.110158	12.6762	55.5648	EDC4;LSM1
regulation of phosphatidylinositol 3-kinase activity (GO:0043551)	2/35	0.0124831	0.110158	12.6762	55.5648	PIK3R4;AMBRA1
regulation of TORC1 signaling (GO:1903432)	2/35	0.0124831	0.110158	12.6762	55.5648	STK11;DEPDC5
cell-matrix adhesion (GO:0007160)	3/100	0.0127385	0.111435	6.51656	28.4326	ILK;TSC1;VCL
phosphorylation (GO:0016310)	6/400	0.0132592	0.114522	3.26474	14.1137	STK11;CSNK2A1;DYRK1A;PIK3R4;TLK2;ILK
regulation of proteasomal ubiquitin-dependent protein catabolic process (GO:0032434)	3/102	0.0134331	0.114522	6.38427	27.5164	TLK2;KEAP1;EIF3H
positive regulation of cell growth (GO:0030307)	3/102	0.0134331	0.114522	6.38427	27.5164	CSNK2A1;BCL2;EIF4G2
regulation of JNK cascade (GO:0046328)	3/105	0.0145147	0.118888	6.19556	26.2233	NCOR1;TRAF3;TRAF2
regulation of apoptotic signaling pathway (GO:2001233)	2/38	0.014611	0.118888	11.6181	49.098	CSNK2A1;BCL2
negative regulation of proteasomal protein catabolic process (GO:1901799)	2/38	0.014611	0.118888	11.6181	49.098	TLK2;EIF3H
ncRNA export from nucleus (GO:0097064)	2/38	0.014611	0.118888	11.6181	49.098	TSC1;AAAS
protein modification by small protein conjugation (GO:0032446)	6/409	0.0146525	0.118888	3.19036	13.4733	UBE2F;CUL5;UBE2N;KEAP1;RNF7;AAAS
regulation of cell cycle (GO:0051726)	5/296	0.0146541	0.118888	3.66278	15.468	STK11;CSNK2A1;TSC2;TSC1;EIF4G2
protein localization to nucleus (GO:0034504)	3/106	0.0148859	0.119802	6.1351	25.8124	RPAIN;TSC2;KPNB1
regulation of protein ubiquitination (GO:0031396)	3/109	0.0160317	0.127999	5.96056	24.6361	DNAJA1;PAXIP1;UBE2N
regulation of response to DNA damage stimulus (GO:2001020)	2/41	0.0168834	0.133738	10.7228	43.7643	UBE2N;MCL1
negative regulation of transcription by RNA polymerase II (GO:0000122)	8/684	0.0180641	0.141842	2.55661	10.2618	HEXIM1;NCOR1;ZEB1;NCOA5;CNOT2;SNAI2;SIRT6;BCOR
protein polyubiquitination (GO:0000209)	5/314	0.0184386	0.141842	3.44625	13.7619	SHARPIN;TRAF3;BCL2;UBE2N;TRAF2
regulation of cell-substrate adhesion (GO:0010810)	2/43	0.0184765	0.141842	10.1987	40.7057	TSC1;PPM1F
regulation of transcription by RNA polymerase II (GO:0006357)	18/2206	0.0185215	0.141842	1.84476	7.35841	HEXIM1;KMT2D;SS18;NCOA5;RFX3;SIRT6;ARID1A;ZFX;JMJD6;SENP1;NCOR1;ZEB1;SP1;CNOT2;AGO2;SNAI2;SAP18;BCOR
cytosolic transport (GO:0016482)	3/116	0.0188935	0.141842	5.58934	22.1837	SYS1;VPS51;VPS52
positive regulation of angiogenesis (GO:0045766)	3/116	0.0188935	0.141842	5.58934	22.1837	SP1;AGO2;SIRT6
tumor necrosis factor-mediated signaling pathway (GO:0033209)	3/116	0.0188935	0.141842	5.58934	22.1837	TRAF3;ILK;TRAF2
positive regulation of cell-matrix adhesion (GO:0001954)	2/44	0.0192959	0.14379	9.95539	39.3025	TSC1;PPM1F
regulation of cellular response to stress (GO:0080135)	3/118	0.0197598	0.146165	5.49158	21.5495	PTGES3;AAAS;MCL1
macroautophagy (GO:0016236)	3/120	0.0206478	0.151618	5.39716	20.9418	CSNK2A1;PIK3R4;AMBRA1
regulation of cell growth (GO:0001558)	4/217	0.0213409	0.155572	3.97597	15.2961	STK11;CSNK2A1;BCL2;EIF4G2
epithelium development (GO:0060429)	3/122	0.0215575	0.156021	5.30592	20.359	SNAI2;TAGLN2;VCL
regulation of phosphorylation (GO:0042325)	3/125	0.0229627	0.158962	5.17466	19.5286	PTGES3;ILK;AAAS
regulation of chromosome separation (GO:1905818)	1/5	0.0240181	0.158962	51.8203	193.235	CSNK2A1
negative regulation of vitamin D biosynthetic process (GO:0010957)	1/5	0.0240181	0.158962	51.8203	193.235	SNAI2
deadenylation-independent decapping of nuclear-transcribed mRNA (GO:0031087)	1/5	0.0240181	0.158962	51.8203	193.235	EDC4
regulation of mitophagy (GO:1901524)	1/5	0.0240181	0.158962	51.8203	193.235	TSC2
oxidative RNA demethylation (GO:0035513)	1/5	0.0240181	0.158962	51.8203	193.235	JMJD6
regulation of sequestering of zinc ion (GO:0061088)	1/5	0.0240181	0.158962	51.8203	193.235	AP3D1
regulation of vitamin D receptor signaling pathway (GO:0070562)	1/5	0.0240181	0.158962	51.8203	193.235	SNAI2
response to mitochondrial depolarisation (GO:0098780)	1/5	0.0240181	0.158962	51.8203	193.235	AMBRA1
rRNA transport (GO:0051029)	1/5	0.0240181	0.158962	51.8203	193.235	TSC1
positive regulation of oxidative stress-induced neuron death (GO:1903223)	1/5	0.0240181	0.158962	51.8203	193.235	MCL1
mRNA cleavage (GO:0006379)	1/5	0.0240181	0.158962	51.8203	193.235	CSTF3
mRNA cleavage involved in gene silencing by miRNA (GO:0035279)	1/5	0.0240181	0.158962	51.8203	193.235	AGO2
intrinsic apoptotic signaling pathway in response to DNA damage (GO:0008630)	2/51	0.0254449	0.16403	8.53018	31.3163	BCL2;MCL1
positive regulation of multicellular organismal process (GO:0051240)	5/345	0.0263725	0.16403	3.12708	11.3683	PAXIP1;AGO2;GNAS;RFX3;SIRT6
post-translational protein modification (GO:0043687)	5/345	0.0263725	0.16403	3.12708	11.3683	UBE2F;WSB2;CUL5;KEAP1;RNF7
regulation of intrinsic apoptotic signaling pathway (GO:2001242)	2/52	0.0263804	0.16403	8.35916	30.3866	BCL2;MCL1
endocytic recycling (GO:0032456)	2/52	0.0263804	0.16403	8.35916	30.3866	VPS51;VPS52
RNA metabolic process (GO:0016070)	3/133	0.0269487	0.16403	4.85426	17.5424	PCBP2;AGO2;LSM1
positive regulation of B cell activation (GO:0050871)	2/53	0.0273297	0.16403	8.19484	29.4996	PAXIP1;BCL2
regulation of apoptotic process (GO:0042981)	8/742	0.0277135	0.16403	2.34749	8.4177	DNAJA1;CASP8;BCL2;NAA35;SAP18;TRAF2;CFLAR;MCL1
cellular response to DNA damage stimulus (GO:0006974)	5/350	0.0278281	0.16403	3.08097	11.0351	RPAIN;STK11;BCL2;TLK2;MCL1
regulation of proteolysis (GO:0030162)	2/54	0.0282927	0.16403	8.03684	28.6526	CASP8;TRAF3
ribonucleoprotein complex assembly (GO:0022618)	3/136	0.0285328	0.16403	4.74404	16.8731	PTGES3;SRSF5;EIF2S2
aminophospholipid transport (GO:0015917)	1/6	0.0287528	0.16403	41.4542	147.122	TMEM30A
pyrimidine nucleotide-sugar transmembrane transport (GO:0090481)	1/6	0.0287528	0.16403	41.4542	147.122	SLC35A2
negative regulation of establishment of protein localization to mitochondrion (GO:1903748)	1/6	0.0287528	0.16403	41.4542	147.122	DNAJA1
cellular lipid biosynthetic process (GO:0097384)	1/6	0.0287528	0.16403	41.4542	147.122	GNPAT
negative regulation of vitamin metabolic process (GO:0046137)	1/6	0.0287528	0.16403	41.4542	147.122	SNAI2
regulation of tooth mineralization (GO:0070170)	1/6	0.0287528	0.16403	41.4542	147.122	BCOR
glycerol ether biosynthetic process (GO:0046504)	1/6	0.0287528	0.16403	41.4542	147.122	GNPAT
regulation of vitamin D biosynthetic process (GO:0060556)	1/6	0.0287528	0.16403	41.4542	147.122	SNAI2
intracellular pH elevation (GO:0051454)	1/6	0.0287528	0.16403	41.4542	147.122	BCL2
macromolecule biosynthetic process (GO:0009059)	1/6	0.0287528	0.16403	41.4542	147.122	EIF4G2
N-terminal peptidyl-methionine acetylation (GO:0017196)	1/6	0.0287528	0.16403	41.4542	147.122	NAA30
negative regulation of amyloid precursor protein biosynthetic process (GO:0042985)	1/6	0.0287528	0.16403	41.4542	147.122	AGO2
regulation of gene silencing by RNA (GO:0060966)	2/55	0.0292691	0.16403	7.88481	27.843	AGO2;AAAS
regulation of posttranscriptional gene silencing (GO:0060147)	2/55	0.0292691	0.16403	7.88481	27.843	AGO2;AAAS
regulation of cellular component organization (GO:0051128)	3/139	0.0301655	0.16403	4.63869	16.2403	STK11;TSC2;TRAF2
positive regulation of establishment of protein localization to mitochondrion (GO:1903749)	2/56	0.0302589	0.16403	7.7384	27.0686	CASP8;BCL2
positive regulation of cell junction assembly (GO:1901890)	2/57	0.0312619	0.16403	7.59732	26.3274	TSC1;PPM1F
cytokine-mediated signaling pathway (GO:0019221)	7/621	0.0313726	0.16403	2.44341	8.45866	ZEB1;TRAF3;BCL2;UBE2N;ILK;TRAF2;MCL1
protein localization to organelle (GO:0033365)	3/142	0.0318467	0.16403	4.53788	15.6413	DNAJA1;SYS1;TMEM30A
negative regulation of DNA-binding transcription factor activity (GO:0043433)	3/143	0.0324178	0.16403	4.50524	15.4487	PAXIP1;TRAF3;KEAP1
positive regulation of apoptotic signaling pathway (GO:2001235)	2/59	0.0333069	0.16403	7.33001	24.9366	BCL2;TRAF2
selective autophagy (GO:0061912)	2/59	0.0333069	0.16403	7.33001	24.9366	UBE2N;AMBRA1
adenylate cyclase-activating dopamine receptor signaling pathway (GO:0007191)	1/7	0.0334648	0.16403	34.5434	117.353	GNAS
regulation of chromatin assembly or disassembly (GO:0001672)	1/7	0.0334648	0.16403	34.5434	117.353	TLK2
regulation of cytoplasmic mRNA processing body assembly (GO:0010603)	1/7	0.0334648	0.16403	34.5434	117.353	CNOT2
negative regulation of protein kinase activity by regulation of protein phosphorylation (GO:0044387)	1/7	0.0334648	0.16403	34.5434	117.353	PPM1F
nuclear-transcribed mRNA catabolic process, deadenylation-independent decay (GO:0031086)	1/7	0.0334648	0.16403	34.5434	117.353	EDC4
deadenylation-dependent decapping of nuclear-transcribed mRNA (GO:0000290)	1/7	0.0334648	0.16403	34.5434	117.353	LSM1
regulation of miRNA mediated inhibition of translation (GO:1905616)	1/7	0.0334648	0.16403	34.5434	117.353	AGO2
desmosome organization (GO:0002934)	1/7	0.0334648	0.16403	34.5434	117.353	SNAI2
regulation of muscle organ development (GO:0048634)	1/7	0.0334648	0.16403	34.5434	117.353	SFMBT1
regulation of oxidative stress-induced neuron intrinsic apoptotic signaling pathway (GO:1903376)	1/7	0.0334648	0.16403	34.5434	117.353	MCL1
regulation of skeletal muscle satellite cell proliferation (GO:0014842)	1/7	0.0334648	0.16403	34.5434	117.353	CFLAR
histone H3-K4 dimethylation (GO:0044648)	1/7	0.0334648	0.16403	34.5434	117.353	KMT2D
positive regulation of intracellular estrogen receptor signaling pathway (GO:0033148)	1/7	0.0334648	0.16403	34.5434	117.353	KMT2D
positive regulation of miRNA mediated inhibition of translation (GO:1905618)	1/7	0.0334648	0.16403	34.5434	117.353	AGO2
rRNA-containing ribonucleoprotein complex export from nucleus (GO:0071428)	1/7	0.0334648	0.16403	34.5434	117.353	TSC1
TRAIL-activated apoptotic signaling pathway (GO:0036462)	1/7	0.0334648	0.16403	34.5434	117.353	CASP8
miRNA loading onto RISC involved in gene silencing by miRNA (GO:0035280)	1/7	0.0334648	0.16403	34.5434	117.353	AGO2
positive regulation of trophoblast cell migration (GO:1901165)	1/7	0.0334648	0.16403	34.5434	117.353	AGO2
protein desumoylation (GO:0016926)	1/7	0.0334648	0.16403	34.5434	117.353	SENP1
protein phosphorylation (GO:0006468)	6/496	0.0336781	0.16403	2.6122	8.85773	STK11;CSNK2A1;DYRK1A;PIK3R4;TLK2;ILK
peptidyl-threonine phosphorylation (GO:0018107)	2/60	0.0343486	0.16403	7.20327	24.2836	CSNK2A1;DYRK1A
regulation of canonical Wnt signaling pathway (GO:0060828)	4/253	0.0347605	0.16403	3.39491	11.4044	STK11;USP34;SNAI2;ILK
positive regulation of intracellular protein transport (GO:0090316)	3/148	0.0353537	0.16403	4.34879	14.5352	CASP8;TMEM30A;BCL2
double-strand break repair via nonhomologous end joining (GO:0006303)	2/62	0.0364696	0.16403	6.96246	23.0546	PAXIP1;UBE2N
positive regulation of cysteine-type endopeptidase activity (GO:2001056)	2/62	0.0364696	0.16403	6.96246	23.0546	CASP8;PPM1F
I-kappaB kinase/NF-kappaB signaling (GO:0007249)	2/62	0.0364696	0.16403	6.96246	23.0546	SHARPIN;TRAF2
regulation of cytokine production (GO:0001817)	3/150	0.0365653	0.16403	4.28919	14.1914	CASP8;TRAF3;SNAI2
response to cytokine (GO:0034097)	3/150	0.0365653	0.16403	4.28919	14.1914	CASP8;BCL2;MCL1
positive regulation of DNA metabolic process (GO:0051054)	2/63	0.0375487	0.16403	6.84797	22.4758	UBE2N;SIRT6
negative regulation of programmed cell death (GO:0043069)	5/381	0.0379935	0.16403	2.82247	9.23045	DNAJA1;BCL2;NAA35;CFLAR;MCL1
positive regulation of nucleic acid-templated transcription (GO:1903508)	6/511	0.0380768	0.16403	2.53265	8.27709	SP1;DYRK1A;RFX3;ILK;ARID1A;JMJD6
protein retention in ER lumen (GO:0006621)	1/8	0.0381541	0.16403	29.6071	96.7006	RER1
negative regulation of keratinocyte proliferation (GO:0010839)	1/8	0.0381541	0.16403	29.6071	96.7006	SNAI2
cell migration involved in heart development (GO:0060973)	1/8	0.0381541	0.16403	29.6071	96.7006	SNAI2
regulation of establishment of protein localization to mitochondrion (GO:1903747)	1/8	0.0381541	0.16403	29.6071	96.7006	DNAJA1
cellular response to UV-B (GO:0071493)	1/8	0.0381541	0.16403	29.6071	96.7006	STK11
peptidyl-lysine hydroxylation (GO:0017185)	1/8	0.0381541	0.16403	29.6071	96.7006	JMJD6
peptidyl-serine autophosphorylation (GO:0036289)	1/8	0.0381541	0.16403	29.6071	96.7006	DYRK1A
positive regulation of cysteine-type endopeptidase activity involved in apoptotic signaling pathway (GO:2001269)	1/8	0.0381541	0.16403	29.6071	96.7006	CASP8
response to hydroperoxide (GO:0033194)	1/8	0.0381541	0.16403	29.6071	96.7006	SP1
histone H3-K4 monomethylation (GO:0097692)	1/8	0.0381541	0.16403	29.6071	96.7006	KMT2D
positive regulation of intracellular steroid hormone receptor signaling pathway (GO:0033145)	1/8	0.0381541	0.16403	29.6071	96.7006	KMT2D
RNA secondary structure unwinding (GO:0010501)	1/8	0.0381541	0.16403	29.6071	96.7006	AGO2
self proteolysis (GO:0097264)	1/8	0.0381541	0.16403	29.6071	96.7006	CASP8
skeletal muscle tissue regeneration (GO:0043403)	1/8	0.0381541	0.16403	29.6071	96.7006	CFLAR
skeletal myofibril assembly (GO:0014866)	1/8	0.0381541	0.16403	29.6071	96.7006	CFLAR
synaptic vesicle budding (GO:0070142)	1/8	0.0381541	0.16403	29.6071	96.7006	AP3D1
TORC1 signaling (GO:0038202)	1/8	0.0381541	0.16403	29.6071	96.7006	NPRL3
mitophagy (GO:0000423)	1/8	0.0381541	0.16403	29.6071	96.7006	AMBRA1
positive regulation of Wnt signaling pathway (GO:0030177)	3/153	0.0384225	0.164481	4.20277	13.6973	CSNK2A1;USP34;ILK
positive regulation of NF-kappaB transcription factor activity (GO:0051092)	3/155	0.039687	0.165684	4.14705	13.3814	UBE2N;TRAF2;CFLAR
regulation of cell-matrix adhesion (GO:0001952)	2/65	0.0397433	0.165684	6.62991	21.3835	TSC1;VCL
regulation of cellular catabolic process (GO:0031329)	2/65	0.0397433	0.165684	6.62991	21.3835	KEAP1;DEPDC5
peptidyl-serine phosphorylation (GO:0018105)	3/156	0.0403272	0.165684	4.11973	13.2273	CSNK2A1;DYRK1A;TLK2
regulation of signal transduction by p53 class mediator (GO:1901796)	3/156	0.0403272	0.165684	4.11973	13.2273	HEXIM1;STK11;CSNK2A1
mitotic spindle organization (GO:0007052)	3/157	0.0409726	0.165684	4.09277	13.0758	STAG2;AAAS;KPNB1
negative regulation of signal transduction (GO:0009968)	4/267	0.0410498	0.165684	3.21191	10.2555	CSNK2A1;BCL2;TSC2;SNAI2
protein deubiquitination (GO:0016579)	4/267	0.0410498	0.165684	3.21191	10.2555	TRAF3;USP34;KEAP1;TRAF2
regulation of transcription, DNA-templated (GO:0006355)	17/2244	0.041154	0.165684	1.68664	5.38112	HEXIM1;KMT2D;SFMBT1;DYRK1A;RFX3;ILK;ARID1A;ZFX;PPM1F;JMJD6;NCOR1;ZEB1;SP1;CNOT2;SNAI2;SAP18;BCOR
regulation of gene silencing by miRNA (GO:0060964)	2/67	0.0419855	0.165684	6.42526	20.3709	AGO2;AAAS
peptidyl-threonine modification (GO:0018210)	2/67	0.0419855	0.165684	6.42526	20.3709	CSNK2A1;DYRK1A
protein ubiquitination (GO:0016567)	6/525	0.0425009	0.165684	2.46255	7.77731	CUL5;BCL2;UBE2N;KEAP1;TRAF2;RNF7
amyloid-beta formation (GO:0034205)	1/9	0.0428209	0.165684	25.9049	81.6195	DYRK1A
astral microtubule organization (GO:0030953)	1/9	0.0428209	0.165684	25.9049	81.6195	KPNB1
negative regulation of glycoprotein biosynthetic process (GO:0010561)	1/9	0.0428209	0.165684	25.9049	81.6195	AGO2
negative regulation of necroptotic process (GO:0060546)	1/9	0.0428209	0.165684	25.9049	81.6195	CASP8
regulation of endothelial cell development (GO:1901550)	1/9	0.0428209	0.165684	25.9049	81.6195	VCL
regulation of endothelial cell differentiation (GO:0045601)	1/9	0.0428209	0.165684	25.9049	81.6195	ZEB1
regulation of protein deacetylation (GO:0090311)	1/9	0.0428209	0.165684	25.9049	81.6195	DYRK1A
epithelial cilium movement involved in determination of left/right asymmetry (GO:0060287)	1/9	0.0428209	0.165684	25.9049	81.6195	RFX3
epithelial to mesenchymal transition involved in endocardial cushion formation (GO:0003198)	1/9	0.0428209	0.165684	25.9049	81.6195	SNAI2
regulation of sterol biosynthetic process (GO:0106118)	1/9	0.0428209	0.165684	25.9049	81.6195	KPNB1
galactose metabolic process (GO:0006012)	1/9	0.0428209	0.165684	25.9049	81.6195	SLC35A2
regulation of transmembrane transporter activity (GO:0022898)	1/9	0.0428209	0.165684	25.9049	81.6195	BCL2
small RNA loading onto RISC (GO:0070922)	1/9	0.0428209	0.165684	25.9049	81.6195	AGO2
RNA 3'-end processing (GO:0031123)	2/69	0.0442741	0.17065	6.23284	19.43	CSTF3;SRSF5
positive regulation of cell-substrate adhesion (GO:0010811)	2/70	0.0454355	0.171763	6.14087	18.9842	ILK;PPM1F
snRNA transcription by RNA polymerase II (GO:0042795)	2/70	0.0454355	0.171763	6.14087	18.9842	SP1;INTS10
heart development (GO:0007507)	3/164	0.0456361	0.171763	3.91344	12.081	CASP8;TSC2;BCOR
regulation of glycolytic process (GO:0006110)	2/71	0.0466082	0.171763	6.05156	18.554	NCOR1;AAAS
nucleic acid metabolic process (GO:0090304)	2/71	0.0466082	0.171763	6.05156	18.554	PCBP2;LSM1
snRNA transcription (GO:0009301)	2/71	0.0466082	0.171763	6.05156	18.554	SP1;INTS10
negative regulation of cell adhesion mediated by integrin (GO:0033629)	1/10	0.0474653	0.171763	23.0255	70.176	SNAI2
adherens junction assembly (GO:0034333)	1/10	0.0474653	0.171763	23.0255	70.176	VCL
negative regulation of cell-cell adhesion mediated by cadherin (GO:2000048)	1/10	0.0474653	0.171763	23.0255	70.176	PPM1F
negative regulation of glycolytic process (GO:0045820)	1/10	0.0474653	0.171763	23.0255	70.176	NCOR1
negative regulation of phosphatidylinositol 3-kinase signaling (GO:0014067)	1/10	0.0474653	0.171763	23.0255	70.176	TSC2
negative regulation of purine nucleotide metabolic process (GO:1900543)	1/10	0.0474653	0.171763	23.0255	70.176	NCOR1
ether lipid biosynthetic process (GO:0008611)	1/10	0.0474653	0.171763	23.0255	70.176	GNPAT
formation of translation preinitiation complex (GO:0001731)	1/10	0.0474653	0.171763	23.0255	70.176	EIF2S2
regulation of type B pancreatic cell development (GO:2000074)	1/10	0.0474653	0.171763	23.0255	70.176	RFX3
production of siRNA involved in RNA interference (GO:0030422)	1/10	0.0474653	0.171763	23.0255	70.176	AGO2
protein localization to endosome (GO:0036010)	1/10	0.0474653	0.171763	23.0255	70.176	TMEM30A
response to ionizing radiation (GO:0010212)	2/72	0.0477919	0.172325	5.96481	18.1384	STK11;PAXIP1
positive regulation of JNK cascade (GO:0046330)	2/73	0.0489866	0.174396	5.8805	17.7368	TRAF3;TRAF2
peptidyl-serine modification (GO:0018209)	3/169	0.0491218	0.174396	3.7946	11.4349	CSNK2A1;DYRK1A;TLK2
DNA damage response, signal transduction by p53 class mediator (GO:0030330)	2/74	0.0501921	0.174396	5.79854	17.3486	PAXIP1;CNOT2
regulation of stress fiber assembly (GO:0051492)	2/74	0.0501921	0.174396	5.79854	17.3486	TSC1;PPM1F
nuclear-transcribed mRNA catabolic process (GO:0000956)	3/171	0.0505517	0.174396	3.74905	11.19	CNOT2;CSDE1;LSM1
pyrimidine nucleoside salvage (GO:0043097)	1/11	0.0520874	0.174396	20.7219	61.2297	TK1
pyrimidine-containing compound salvage (GO:0008655)	1/11	0.0520874	0.174396	20.7219	61.2297	TK1
negative regulation of defense response to virus (GO:0050687)	1/11	0.0520874	0.174396	20.7219	61.2297	PCBP2
regulation of amyloid precursor protein biosynthetic process (GO:0042984)	1/11	0.0520874	0.174396	20.7219	61.2297	AGO2
negative regulation of intracellular estrogen receptor signaling pathway (GO:0033147)	1/11	0.0520874	0.174396	20.7219	61.2297	CNOT2
negative regulation of programmed necrotic cell death (GO:0062099)	1/11	0.0520874	0.174396	20.7219	61.2297	CASP8
negative regulation of steroid biosynthetic process (GO:0010894)	1/11	0.0520874	0.174396	20.7219	61.2297	SNAI2
negative regulation of translation, ncRNA-mediated (GO:0040033)	1/11	0.0520874	0.174396	20.7219	61.2297	AGO2
chromatin-mediated maintenance of transcription (GO:0048096)	1/11	0.0520874	0.174396	20.7219	61.2297	ARID1A
Notch signaling involved in heart development (GO:0061314)	1/11	0.0520874	0.174396	20.7219	61.2297	SNAI2
cyclooxygenase pathway (GO:0019371)	1/11	0.0520874	0.174396	20.7219	61.2297	PTGES3
regulation of mitochondrial depolarization (GO:0051900)	1/11	0.0520874	0.174396	20.7219	61.2297	BCL2
positive regulation of macrophage differentiation (GO:0045651)	1/11	0.0520874	0.174396	20.7219	61.2297	CASP8
insulin-like growth factor receptor signaling pathway (GO:0048009)	1/11	0.0520874	0.174396	20.7219	61.2297	TSC2
positive regulation of phospholipid transport (GO:2001140)	1/11	0.0520874	0.174396	20.7219	61.2297	TMEM30A
miRNA mediated inhibition of translation (GO:0035278)	1/11	0.0520874	0.174396	20.7219	61.2297	AGO2
regulation of RNA splicing (GO:0043484)	2/76	0.052635	0.174396	5.64125	16.61	DYRK1A;JMJD6
regulation of organelle assembly (GO:1902115)	2/77	0.0538721	0.174396	5.56575	16.2584	NPRL2;NPRL3
positive regulation of endothelial cell proliferation (GO:0001938)	2/77	0.0538721	0.174396	5.56575	16.2584	SP1;SIRT6
glycerophospholipid biosynthetic process (GO:0046474)	3/177	0.0549622	0.174396	3.61867	10.4982	GNPAT;CSNK2A1;PIK3R4
organelle assembly (GO:0070925)	5/425	0.0559056	0.174396	2.52109	7.27106	NCOR1;CSDE1;RFX3;PRRC2C;AMBRA1
regulation of cellular response to heat (GO:1900034)	2/79	0.0563772	0.174396	5.42064	15.5881	PTGES3;AAAS
positive regulation of proteasomal ubiquitin-dependent protein catabolic process (GO:0032436)	2/79	0.0563772	0.174396	5.42064	15.5881	KEAP1;SIRT6
mRNA 3'-end processing (GO:0031124)	2/79	0.0563772	0.174396	5.42064	15.5881	CSTF3;SRSF5
RNA processing (GO:0006396)	3/179	0.0564722	0.174396	3.57719	10.2809	CSTF3;LSM1;SRSF5
regulation of alcohol biosynthetic process (GO:1902930)	1/12	0.0566873	0.174396	18.8371	54.0664	KPNB1
negative regulation of gene silencing by miRNA (GO:0060965)	1/12	0.0566873	0.174396	18.8371	54.0664	NCOR1
autophagy of peroxisome (GO:0030242)	1/12	0.0566873	0.174396	18.8371	54.0664	PIK3R4
brain morphogenesis (GO:0048854)	1/12	0.0566873	0.174396	18.8371	54.0664	VPS51
negative regulation of JUN kinase activity (GO:0043508)	1/12	0.0566873	0.174396	18.8371	54.0664	DNAJA1
negative regulation of microtubule polymerization (GO:0031115)	1/12	0.0566873	0.174396	18.8371	54.0664	DYRK1A
negative regulation of production of miRNAs involved in gene silencing by miRNA (GO:1903799)	1/12	0.0566873	0.174396	18.8371	54.0664	NCOR1
cellular response to nitrogen levels (GO:0043562)	1/12	0.0566873	0.174396	18.8371	54.0664	NPRL2
cellular response to nitrogen starvation (GO:0006995)	1/12	0.0566873	0.174396	18.8371	54.0664	NPRL2
negative regulation of transcription elongation from RNA polymerase II promoter (GO:0034244)	1/12	0.0566873	0.174396	18.8371	54.0664	HEXIM1
nucleoside salvage (GO:0043174)	1/12	0.0566873	0.174396	18.8371	54.0664	TK1
regulation of myoblast fusion (GO:1901739)	1/12	0.0566873	0.174396	18.8371	54.0664	CFLAR
peptidyl-methionine modification (GO:0018206)	1/12	0.0566873	0.174396	18.8371	54.0664	NAA30
regulation of nucleobase-containing compound metabolic process (GO:0019219)	1/12	0.0566873	0.174396	18.8371	54.0664	PCBP2
epithelial cell-cell adhesion (GO:0090136)	1/12	0.0566873	0.174396	18.8371	54.0664	VCL
sphingoid metabolic process (GO:0046519)	1/12	0.0566873	0.174396	18.8371	54.0664	KDSR
maintenance of protein localization in endoplasmic reticulum (GO:0035437)	1/12	0.0566873	0.174396	18.8371	54.0664	RER1
toll-like receptor 3 signaling pathway (GO:0034138)	1/12	0.0566873	0.174396	18.8371	54.0664	CASP8
positive regulation of protein ubiquitination (GO:0031398)	2/82	0.06021	0.179077	5.21658	14.6582	PAXIP1;UBE2N
positive regulation of transcription, DNA-templated (GO:0045893)	10/1183	0.0606636	0.179077	1.83536	5.14343	KMT2D;SS18;SP1;AGO2;DYRK1A;RFX3;ILK;ARID1A;JMJD6;SENP1
regulation of actomyosin structure organization (GO:0110020)	1/13	0.0612651	0.179077	17.2665	48.2175	TSC1
negative regulation of histone methylation (GO:0031061)	1/13	0.0612651	0.179077	17.2665	48.2175	BCOR
negative regulation of intrinsic apoptotic signaling pathway in response to DNA damage by p53 class mediator (GO:1902166)	1/13	0.0612651	0.179077	17.2665	48.2175	BCL2
regulation of histone modification (GO:0031056)	1/13	0.0612651	0.179077	17.2665	48.2175	UBE2N
chromatin organization involved in regulation of transcription (GO:0034401)	1/13	0.0612651	0.179077	17.2665	48.2175	ARID1A
cytoplasmic sequestering of protein (GO:0051220)	1/13	0.0612651	0.179077	17.2665	48.2175	KEAP1
regulation of nucleocytoplasmic transport (GO:0046822)	1/13	0.0612651	0.179077	17.2665	48.2175	AAAS
regulation of protein exit from endoplasmic reticulum (GO:0070861)	1/13	0.0612651	0.179077	17.2665	48.2175	TMEM30A
positive regulation of heterochromatin assembly (GO:0031453)	1/13	0.0612651	0.179077	17.2665	48.2175	SIRT6
response to iron ion (GO:0010039)	1/13	0.0612651	0.179077	17.2665	48.2175	BCL2
response to UV-B (GO:0010224)	1/13	0.0612651	0.179077	17.2665	48.2175	STK11
positive regulation of nuclear-transcribed mRNA poly(A) tail shortening (GO:0060213)	1/13	0.0612651	0.179077	17.2665	48.2175	AGO2
positive regulation of protein exit from endoplasmic reticulum (GO:0070863)	1/13	0.0612651	0.179077	17.2665	48.2175	TMEM30A
toll-like receptor 9 signaling pathway (GO:0034162)	1/13	0.0612651	0.179077	17.2665	48.2175	PIK3R4
protein localization to mitochondrion (GO:0070585)	1/13	0.0612651	0.179077	17.2665	48.2175	DNAJA1
regulation of defense response (GO:0031347)	2/83	0.061507	0.179077	5.15192	14.3667	CASP8;TRAF3
negative regulation of defense response (GO:0031348)	2/85	0.0641298	0.179077	5.02727	13.8091	SHARPIN;PCBP2
B cell activation (GO:0042113)	2/85	0.0641298	0.179077	5.02727	13.8091	CASP8;BCL2
negative regulation of phosphorylation (GO:0042326)	2/86	0.0654552	0.179077	4.96717	13.5424	NCOR1;NPRL2
regulation of neuron death (GO:1901214)	2/86	0.0654552	0.179077	4.96717	13.5424	TRAF2;TSC1
activation of cysteine-type endopeptidase activity (GO:0097202)	1/14	0.0658209	0.179077	15.9375	43.363	CASP8
negative regulation of bone mineralization (GO:0030502)	1/14	0.0658209	0.179077	15.9375	43.363	BCOR
negative regulation of cartilage development (GO:0061037)	1/14	0.0658209	0.179077	15.9375	43.363	SNAI2
pyrimidine nucleoside biosynthetic process (GO:0046134)	1/14	0.0658209	0.179077	15.9375	43.363	TK1
amyloid precursor protein catabolic process (GO:0042987)	1/14	0.0658209	0.179077	15.9375	43.363	DYRK1A
negative regulation of DNA-templated transcription, elongation (GO:0032785)	1/14	0.0658209	0.179077	15.9375	43.363	HEXIM1
negative regulation of mRNA splicing, via spliceosome (GO:0048025)	1/14	0.0658209	0.179077	15.9375	43.363	SAP18
regulation of chromatin organization (GO:1902275)	1/14	0.0658209	0.179077	15.9375	43.363	TLK2
negative regulation of translational initiation (GO:0045947)	1/14	0.0658209	0.179077	15.9375	43.363	AGO2
negative regulation of viral transcription (GO:0032897)	1/14	0.0658209	0.179077	15.9375	43.363	HEXIM1
regulation of intrinsic apoptotic signaling pathway in response to DNA damage by p53 class mediator (GO:1902165)	1/14	0.0658209	0.179077	15.9375	43.363	BCL2
cytoplasmic sequestering of transcription factor (GO:0042994)	1/14	0.0658209	0.179077	15.9375	43.363	KEAP1
peptidyl-serine dephosphorylation (GO:0070262)	1/14	0.0658209	0.179077	15.9375	43.363	PPM1F
ether lipid metabolic process (GO:0046485)	1/14	0.0658209	0.179077	15.9375	43.363	GNPAT
regulation of trophoblast cell migration (GO:1901163)	1/14	0.0658209	0.179077	15.9375	43.363	AGO2
histone H3-K4 trimethylation (GO:0080182)	1/14	0.0658209	0.179077	15.9375	43.363	KMT2D
positive regulation of protein deacetylation (GO:0090312)	1/14	0.0658209	0.179077	15.9375	43.363	DYRK1A
pre-miRNA processing (GO:0031054)	1/14	0.0658209	0.179077	15.9375	43.363	AGO2
N-terminal protein amino acid modification (GO:0031365)	1/14	0.0658209	0.179077	15.9375	43.363	NAA35
negative regulation of Wnt signaling pathway (GO:0030178)	3/191	0.0659413	0.179077	3.34682	9.09997	STK11;TSC2;SNAI2
retrograde transport, endosome to Golgi (GO:0042147)	2/88	0.0681334	0.179077	4.85116	13.0316	VPS51;VPS52
cellular response to tumor necrosis factor (GO:0071356)	3/194	0.0684159	0.179077	3.29375	8.83433	TRAF3;ILK;TRAF2
regulation of cysteine-type endopeptidase activity involved in apoptotic process (GO:0043281)	2/89	0.0694861	0.179077	4.79516	12.7869	CSNK2A1;PPM1F
regulation of type I interferon production (GO:0032479)	2/89	0.0694861	0.179077	4.79516	12.7869	TRAF3;PCBP2
post-Golgi vesicle-mediated transport (GO:0006892)	2/89	0.0694861	0.179077	4.79516	12.7869	SYS1;AP1M1
transcription by RNA polymerase II (GO:0006366)	4/320	0.0703257	0.179077	2.66599	7.07717	NCOR1;SP1;CSTF3;INTS10
negative regulation of androgen receptor signaling pathway (GO:0060766)	1/15	0.0703548	0.179077	14.7984	39.2779	NCOR1
negative regulation of chondrocyte differentiation (GO:0032331)	1/15	0.0703548	0.179077	14.7984	39.2779	SNAI2
androgen receptor signaling pathway (GO:0030521)	1/15	0.0703548	0.179077	14.7984	39.2779	ARID1A
anterograde synaptic vesicle transport (GO:0048490)	1/15	0.0703548	0.179077	14.7984	39.2779	AP3D1
negative regulation of mRNA processing (GO:0050686)	1/15	0.0703548	0.179077	14.7984	39.2779	SAP18
regulation of establishment of protein localization (GO:0070201)	1/15	0.0703548	0.179077	14.7984	39.2779	DNAJA1
regulation of macrophage differentiation (GO:0045649)	1/15	0.0703548	0.179077	14.7984	39.2779	CASP8
regulation of nuclear-transcribed mRNA catabolic process, deadenylation-dependent decay (GO:1900151)	1/15	0.0703548	0.179077	14.7984	39.2779	AGO2
regulation of nuclear-transcribed mRNA poly(A) tail shortening (GO:0060211)	1/15	0.0703548	0.179077	14.7984	39.2779	AGO2
peptidyl-tyrosine autophosphorylation (GO:0038083)	1/15	0.0703548	0.179077	14.7984	39.2779	DYRK1A
establishment of spindle localization (GO:0051293)	1/15	0.0703548	0.179077	14.7984	39.2779	KPNB1
positive regulation of chromatin organization (GO:1905269)	1/15	0.0703548	0.179077	14.7984	39.2779	UBE2N
positive regulation of chromosome organization (GO:2001252)	1/15	0.0703548	0.179077	14.7984	39.2779	SIRT6
positive regulation of histone H3-K4 methylation (GO:0051571)	1/15	0.0703548	0.179077	14.7984	39.2779	PAXIP1
histone H3 deacetylation (GO:0070932)	1/15	0.0703548	0.179077	14.7984	39.2779	SIRT6
histone mRNA catabolic process (GO:0071044)	1/15	0.0703548	0.179077	14.7984	39.2779	LSM1
positive regulation of nuclear-transcribed mRNA catabolic process, deadenylation-dependent decay (GO:1900153)	1/15	0.0703548	0.179077	14.7984	39.2779	AGO2
macrophage differentiation (GO:0030225)	1/15	0.0703548	0.179077	14.7984	39.2779	CASP8
synaptic vesicle transport along microtubule (GO:0099517)	1/15	0.0703548	0.179077	14.7984	39.2779	AP3D1
prostanoid biosynthetic process (GO:0046457)	1/15	0.0703548	0.179077	14.7984	39.2779	PTGES3
negative regulation of protein kinase activity (GO:0006469)	2/90	0.0708476	0.179077	4.74043	12.549	TSC2;PPM1F
negative regulation of translation (GO:0017148)	2/90	0.0708476	0.179077	4.74043	12.549	AGO2;TSC1
regulation of mRNA splicing, via spliceosome (GO:0048024)	2/90	0.0708476	0.179077	4.74043	12.549	SAP18;JMJD6
regulation of signal transduction (GO:0009966)	3/198	0.0717807	0.180981	3.22553	8.4965	SHARPIN;TSC2;ILK
regulation of lipid metabolic process (GO:0019216)	2/92	0.0735966	0.182806	4.63462	12.0925	NCOR1;SP1
positive regulation of transcription by RNA polymerase II (GO:0045944)	8/908	0.0736843	0.182806	1.89793	4.94973	KMT2D;SS18;PAXIP1;SP1;AGO2;RFX3;JMJD6;SENP1
activation of NF-kappaB-inducing kinase activity (GO:0007250)	1/16	0.074867	0.182806	13.8111	35.799	TRAF2
apoptotic DNA fragmentation (GO:0006309)	1/16	0.074867	0.182806	13.8111	35.799	KPNB1
negative regulation of epithelial cell differentiation (GO:0030857)	1/16	0.074867	0.182806	13.8111	35.799	ZEB1
regulation of intrinsic apoptotic signaling pathway in response to DNA damage (GO:1902229)	1/16	0.074867	0.182806	13.8111	35.799	SNAI2
regulation of isotype switching (GO:0045191)	1/16	0.074867	0.182806	13.8111	35.799	PAXIP1
nuclear transport (GO:0051169)	1/16	0.074867	0.182806	13.8111	35.799	AAAS
oogenesis (GO:0048477)	1/16	0.074867	0.182806	13.8111	35.799	KMT2D
positive regulation by host of viral transcription (GO:0043923)	1/16	0.074867	0.182806	13.8111	35.799	SP1
Golgi to endosome transport (GO:0006895)	1/16	0.074867	0.182806	13.8111	35.799	SYS1
positive regulation of immunoglobulin mediated immune response (GO:0002891)	1/16	0.074867	0.182806	13.8111	35.799	PAXIP1
positive regulation of isotype switching (GO:0045830)	1/16	0.074867	0.182806	13.8111	35.799	PAXIP1
regulation of cellular macromolecule biosynthetic process (GO:2000112)	5/468	0.077429	0.185229	2.2819	5.83801	KMT2D;SP1;RFX3;SNAI2;TSC1
regulation of gene expression (GO:0010468)	9/1079	0.0781698	0.185229	1.8001	4.58821	KMT2D;CASP8;SP1;TRAF3;PCBP2;AGO2;RFX3;SNAI2;PPM1F
negative regulation of ATP metabolic process (GO:1903579)	1/17	0.0793575	0.185229	12.9473	32.8057	NCOR1
negative regulation of ATPase activity (GO:0032780)	1/17	0.0793575	0.185229	12.9473	32.8057	TSC1
amyloid-beta metabolic process (GO:0050435)	1/17	0.0793575	0.185229	12.9473	32.8057	DYRK1A
negative regulation of fatty acid metabolic process (GO:0045922)	1/17	0.0793575	0.185229	12.9473	32.8057	NCOR1
negative regulation of intrinsic apoptotic signaling pathway by p53 class mediator (GO:1902254)	1/17	0.0793575	0.185229	12.9473	32.8057	BCL2
regulation of cholesterol biosynthetic process (GO:0045540)	1/17	0.0793575	0.185229	12.9473	32.8057	KPNB1
cell surface receptor signaling pathway involved in heart development (GO:0061311)	1/17	0.0793575	0.185229	12.9473	32.8057	SNAI2
regulation of establishment of endothelial barrier (GO:1903140)	1/17	0.0793575	0.185229	12.9473	32.8057	VCL
cellular response to gamma radiation (GO:0071480)	1/17	0.0793575	0.185229	12.9473	32.8057	TLK2
regulation of metal ion transport (GO:0010959)	1/17	0.0793575	0.185229	12.9473	32.8057	BCL2
histone H2A monoubiquitination (GO:0035518)	1/17	0.0793575	0.185229	12.9473	32.8057	BCOR
histone H2A ubiquitination (GO:0033522)	1/17	0.0793575	0.185229	12.9473	32.8057	BCOR
RNA interference (GO:0016246)	1/17	0.0793575	0.185229	12.9473	32.8057	AGO2
snRNA metabolic process (GO:0016073)	1/17	0.0793575	0.185229	12.9473	32.8057	INTS10
stem cell development (GO:0048864)	1/17	0.0793575	0.185229	12.9473	32.8057	SNAI2
synaptic vesicle membrane organization (GO:0048499)	1/17	0.0793575	0.185229	12.9473	32.8057	AP3D1
vasculature development (GO:0001944)	1/17	0.0793575	0.185229	12.9473	32.8057	STK11
positive regulation of cold-induced thermogenesis (GO:0120162)	2/97	0.0806159	0.187731	4.38958	11.0532	GNAS;SIRT6
intracellular protein transport (GO:0006886)	4/336	0.0808239	0.18778	2.53543	6.37783	RPAIN;AP3D1;TSC2;KPNB1
negative regulation of neuron death (GO:1901215)	2/98	0.0820441	0.189504	4.34364	10.8613	BCL2;TRAF2
positive regulation of stress-activated MAPK cascade (GO:0032874)	2/99	0.08348	0.189504	4.29864	10.6742	TRAF3;TRAF2
mRNA-containing ribonucleoprotein complex export from nucleus (GO:0071427)	2/99	0.08348	0.189504	4.29864	10.6742	SRSF5;AAAS
regulation of chromosome segregation (GO:0051983)	1/18	0.0838264	0.189504	12.185	30.2068	CSNK2A1
regulation of fatty acid metabolic process (GO:0019217)	1/18	0.0838264	0.189504	12.185	30.2068	NCOR1
chromatin disassembly (GO:0031498)	1/18	0.0838264	0.189504	12.185	30.2068	ARID1A
nucleosome disassembly (GO:0006337)	1/18	0.0838264	0.189504	12.185	30.2068	ARID1A
regulation of production of miRNAs involved in gene silencing by miRNA (GO:1903798)	1/18	0.0838264	0.189504	12.185	30.2068	NCOR1
positive chemotaxis (GO:0050918)	1/18	0.0838264	0.189504	12.185	30.2068	TSC2
positive regulation of amyloid-beta formation (GO:1902004)	1/18	0.0838264	0.189504	12.185	30.2068	SP1
release of cytochrome c from mitochondria (GO:0001836)	1/18	0.0838264	0.189504	12.185	30.2068	BCL2
intracellular estrogen receptor signaling pathway (GO:0030520)	1/18	0.0838264	0.189504	12.185	30.2068	ARID1A
neutrophil degranulation (GO:0043312)	5/481	0.0847098	0.190975	2.2181	5.47543	TMEM30A;PDAP1;KPNB1;VCL;AP1M1
positive regulation of protein modification process (GO:0031401)	3/214	0.0859608	0.190975	2.97852	7.30889	DYRK1A;UBE2N;ILK
positive regulation of protein localization to membrane (GO:1905477)	2/101	0.0863751	0.190975	4.21138	10.3139	CASP8;BCL2
neutrophil activation involved in immune response (GO:0002283)	5/485	0.087021	0.190975	2.19916	5.36949	TMEM30A;PDAP1;KPNB1;VCL;AP1M1
positive regulation of vasculature development (GO:1904018)	2/102	0.0878339	0.190975	4.16905	10.1404	SP1;AGO2
mitotic sister chromatid segregation (GO:0000070)	2/102	0.0878339	0.190975	4.16905	10.1404	CSNK2A1;KPNB1
pyroptosis (GO:0070269)	1/19	0.0882738	0.190975	11.5075	27.9323	CASP8
regulation of bicellular tight junction assembly (GO:2000810)	1/19	0.0882738	0.190975	11.5075	27.9323	SNAI2
regulation of cell-cell adhesion mediated by cadherin (GO:2000047)	1/19	0.0882738	0.190975	11.5075	27.9323	PPM1F
negative regulation of RNA metabolic process (GO:0051253)	1/19	0.0882738	0.190975	11.5075	27.9323	NCOR1
negative regulation of RNA splicing (GO:0033119)	1/19	0.0882738	0.190975	11.5075	27.9323	SAP18
neural crest cell differentiation (GO:0014033)	1/19	0.0882738	0.190975	11.5075	27.9323	SNAI2
cytoplasmic translational initiation (GO:0002183)	1/19	0.0882738	0.190975	11.5075	27.9323	EIF2S2
regulation of mitochondrial membrane permeability (GO:0046902)	1/19	0.0882738	0.190975	11.5075	27.9323	BCL2
DNA double-strand break processing (GO:0000729)	1/19	0.0882738	0.190975	11.5075	27.9323	UBE2N
peptidyl-lysine dimethylation (GO:0018027)	1/19	0.0882738	0.190975	11.5075	27.9323	KMT2D
regulation of stem cell population maintenance (GO:2000036)	1/19	0.0882738	0.190975	11.5075	27.9323	CNOT2
regulation of T cell cytokine production (GO:0002724)	1/19	0.0882738	0.190975	11.5075	27.9323	TRAF2
mesenchymal cell development (GO:0014031)	1/19	0.0882738	0.190975	11.5075	27.9323	SNAI2
prostaglandin biosynthetic process (GO:0001516)	1/19	0.0882738	0.190975	11.5075	27.9323	PTGES3
neutrophil mediated immunity (GO:0002446)	5/488	0.0887761	0.19165	2.18517	5.29168	TMEM30A;PDAP1;KPNB1;VCL;AP1M1
mRNA transport (GO:0051028)	2/104	0.0907737	0.195505	4.08689	9.80603	SRSF5;AAAS
protein-DNA complex disassembly (GO:0032986)	1/20	0.0926999	0.195505	10.9013	25.9276	ARID1A
negative regulation of cyclin-dependent protein serine/threonine kinase activity (GO:0045736)	1/20	0.0926999	0.195505	10.9013	25.9276	HEXIM1
cardiac epithelial to mesenchymal transition (GO:0060317)	1/20	0.0926999	0.195505	10.9013	25.9276	SNAI2
endoplasmic reticulum calcium ion homeostasis (GO:0032469)	1/20	0.0926999	0.195505	10.9013	25.9276	BCL2
epithelial cilium movement involved in extracellular fluid movement (GO:0003351)	1/20	0.0926999	0.195505	10.9013	25.9276	RFX3
positive regulation of epithelial cell differentiation (GO:0030858)	1/20	0.0926999	0.195505	10.9013	25.9276	RFX3
positive regulation of peptidyl-lysine acetylation (GO:2000758)	1/20	0.0926999	0.195505	10.9013	25.9276	PAXIP1
miRNA metabolic process (GO:0010586)	1/20	0.0926999	0.195505	10.9013	25.9276	AGO2
post-transcriptional gene silencing by RNA (GO:0035194)	1/20	0.0926999	0.195505	10.9013	25.9276	AGO2
production of small RNA involved in gene silencing by RNA (GO:0070918)	1/20	0.0926999	0.195505	10.9013	25.9276	AGO2
ubiquitin-dependent protein catabolic process (GO:0006511)	4/354	0.0935115	0.19606	2.40283	5.69391	SHARPIN;PCBP2;KEAP1;RNF7
regulation of cell cycle process (GO:0010564)	2/106	0.0937423	0.19606	4.00789	9.48751	CSNK2A1;PIK3R4
peptidyl-lysine modification (GO:0018205)	2/106	0.0937423	0.19606	4.00789	9.48751	AAAS;SENP1
RNA export from nucleus (GO:0006405)	2/106	0.0937423	0.19606	4.00789	9.48751	SRSF5;AAAS
mRNA export from nucleus (GO:0006406)	2/107	0.0952372	0.198773	3.96952	9.33388	SRSF5;AAAS
regulation of cell-substrate junction assembly (GO:0090109)	1/21	0.0971047	0.19977	10.3557	24.1492	VCL
regulation of cholesterol metabolic process (GO:0090181)	1/21	0.0971047	0.19977	10.3557	24.1492	KPNB1
negative regulation of peptidyl-serine phosphorylation (GO:0033137)	1/21	0.0971047	0.19977	10.3557	24.1492	PPM1F
neuron apoptotic process (GO:0051402)	1/21	0.0971047	0.19977	10.3557	24.1492	BCL2
nuclear-transcribed mRNA poly(A) tail shortening (GO:0000289)	1/21	0.0971047	0.19977	10.3557	24.1492	CNOT2
histone ubiquitination (GO:0016574)	1/21	0.0971047	0.19977	10.3557	24.1492	UBE2N
positive regulation of T cell cytokine production (GO:0002726)	1/21	0.0971047	0.19977	10.3557	24.1492	TRAF2
regulation of protein kinase activity (GO:0045859)	2/110	0.0997627	0.204194	3.85867	8.89409	TSC2;PPM1F
response to endoplasmic reticulum stress (GO:0034976)	2/110	0.0997627	0.204194	3.85867	8.89409	BCL2;TRAF2
regulation of Wnt signaling pathway (GO:0030111)	2/111	0.101285	0.204194	3.82308	8.75417	CSNK2A1;TSC2
negative regulation of biomineral tissue development (GO:0070168)	1/22	0.101488	0.204194	9.8621	22.5626	BCOR
negative regulation of cyclin-dependent protein kinase activity (GO:1904030)	1/22	0.101488	0.204194	9.8621	22.5626	HEXIM1
negative regulation of small molecule metabolic process (GO:0062014)	1/22	0.101488	0.204194	9.8621	22.5626	NCOR1
chaperone-mediated protein complex assembly (GO:0051131)	1/22	0.101488	0.204194	9.8621	22.5626	PTGES3
peptidyl-threonine dephosphorylation (GO:0035970)	1/22	0.101488	0.204194	9.8621	22.5626	PPM1F
positive regulation of amyloid precursor protein catabolic process (GO:1902993)	1/22	0.101488	0.204194	9.8621	22.5626	SP1
positive regulation of DNA-templated transcription, initiation (GO:2000144)	1/22	0.101488	0.204194	9.8621	22.5626	PAXIP1
positive regulation of signal transduction by p53 class mediator (GO:1901798)	1/22	0.101488	0.204194	9.8621	22.5626	HEXIM1
regulation of macroautophagy (GO:0016241)	2/112	0.102813	0.206447	3.78813	8.61741	TSC2;TSC1
positive regulation of metabolic process (GO:0009893)	2/113	0.104348	0.208871	3.75382	8.48373	GNAS;SIRT6
cilium-dependent cell motility (GO:0060285)	1/23	0.105851	0.208871	9.41335	21.1398	RFX3
DNA catabolic process, endonucleolytic (GO:0000737)	1/23	0.105851	0.208871	9.41335	21.1398	KPNB1
positive regulation of histone acetylation (GO:0035066)	1/23	0.105851	0.208871	9.41335	21.1398	PAXIP1
positive regulation of JUN kinase activity (GO:0043507)	1/23	0.105851	0.208871	9.41335	21.1398	TRAF2
positive regulation of morphogenesis of an epithelium (GO:1905332)	1/23	0.105851	0.208871	9.41335	21.1398	SIRT6
positive regulation of transcription initiation from RNA polymerase II promoter (GO:0060261)	1/23	0.105851	0.208871	9.41335	21.1398	PAXIP1
protein deacylation (GO:0035601)	1/23	0.105851	0.208871	9.41335	21.1398	SIRT6
activation of protein kinase activity (GO:0032147)	2/114	0.105889	0.208871	3.72011	8.35302	STK11;TRAF2
apoptotic nuclear changes (GO:0030262)	1/24	0.110192	0.212363	9.00362	19.8577	KPNB1
negative regulation of lipid metabolic process (GO:0045833)	1/24	0.110192	0.212363	9.00362	19.8577	NCOR1
negative regulation of ossification (GO:0030279)	1/24	0.110192	0.212363	9.00362	19.8577	BCOR
regulation of keratinocyte proliferation (GO:0010837)	1/24	0.110192	0.212363	9.00362	19.8577	SNAI2
positive regulation of cellular response to transforming growth factor beta stimulus (GO:1903846)	1/24	0.110192	0.212363	9.00362	19.8577	STK11
response to gamma radiation (GO:0010332)	1/24	0.110192	0.212363	9.00362	19.8577	TLK2
histone monoubiquitination (GO:0010390)	1/24	0.110192	0.212363	9.00362	19.8577	BCOR
positive regulation of neuron apoptotic process (GO:0043525)	1/24	0.110192	0.212363	9.00362	19.8577	MCL1
lipid translocation (GO:0034204)	1/24	0.110192	0.212363	9.00362	19.8577	TMEM30A
positive regulation of transforming growth factor beta receptor signaling pathway (GO:0030511)	1/24	0.110192	0.212363	9.00362	19.8577	STK11
protein K48-linked deubiquitination (GO:0071108)	1/24	0.110192	0.212363	9.00362	19.8577	USP34
protein kinase B signaling (GO:0043491)	1/24	0.110192	0.212363	9.00362	19.8577	TSC2
negative regulation of response to external stimulus (GO:0032102)	2/118	0.112114	0.215653	3.59111	7.8582	SHARPIN;PCBP2
negative regulation of cellular carbohydrate metabolic process (GO:0010677)	1/25	0.114513	0.219012	8.62804	18.6975	NCOR1
receptor catabolic process (GO:0032801)	1/25	0.114513	0.219012	8.62804	18.6975	PIK3R4
RNA splicing, via transesterification reactions (GO:0000375)	1/25	0.114513	0.219012	8.62804	18.6975	LSM1
protein homooligomerization (GO:0051260)	2/121	0.116845	0.220528	3.50004	7.51428	TK1;JMJD6
positive regulation of DNA-binding transcription factor activity (GO:0051091)	3/246	0.117505	0.220528	2.58209	5.52896	UBE2N;TRAF2;CFLAR
regulation of actin filament bundle assembly (GO:0032231)	1/26	0.118813	0.220528	8.2825	17.6434	TSC1
regulation of chondrocyte differentiation (GO:0032330)	1/26	0.118813	0.220528	8.2825	17.6434	SNAI2
negative regulation of protein transport (GO:0051224)	1/26	0.118813	0.220528	8.2825	17.6434	PPM1F
negative regulation of proteolysis involved in cellular protein catabolic process (GO:1903051)	1/26	0.118813	0.220528	8.2825	17.6434	CSNK2A1
cellular response to drug (GO:0035690)	1/26	0.118813	0.220528	8.2825	17.6434	PPM1F
chaperone cofactor-dependent protein refolding (GO:0051085)	1/26	0.118813	0.220528	8.2825	17.6434	PTGES3
regulation of telomere maintenance (GO:0032204)	1/26	0.118813	0.220528	8.2825	17.6434	SIRT6
positive regulation of histone methylation (GO:0031062)	1/26	0.118813	0.220528	8.2825	17.6434	PAXIP1
positive regulation of interleukin-2 production (GO:0032743)	1/26	0.118813	0.220528	8.2825	17.6434	TRAF2
RNA polyadenylation (GO:0043631)	1/26	0.118813	0.220528	8.2825	17.6434	CSTF3
snRNA processing (GO:0016180)	1/26	0.118813	0.220528	8.2825	17.6434	INTS10
lamellipodium assembly (GO:0030032)	1/26	0.118813	0.220528	8.2825	17.6434	VCL
TOR signaling (GO:0031929)	1/26	0.118813	0.220528	8.2825	17.6434	NPRL3
mRNA polyadenylation (GO:0006378)	1/26	0.118813	0.220528	8.2825	17.6434	CSTF3
RNA splicing, via transesterification reactions with bulged adenosine as nucleophile (GO:0000377)	3/251	0.122781	0.224989	2.52938	5.30502	CSTF3;PCBP2;SRSF5
negative regulation of insulin receptor signaling pathway (GO:0046627)	1/27	0.123093	0.224989	7.96354	16.6822	TSC2
regulation of cell junction assembly (GO:1901888)	1/27	0.123093	0.224989	7.96354	16.6822	SNAI2
negative regulation of protein polymerization (GO:0032272)	1/27	0.123093	0.224989	7.96354	16.6822	DYRK1A
positive regulation of cellular component movement (GO:0051272)	1/27	0.123093	0.224989	7.96354	16.6822	STK11
regulation of transcription elongation from RNA polymerase II promoter (GO:0034243)	1/27	0.123093	0.224989	7.96354	16.6822	HEXIM1
positive regulation of gene silencing by miRNA (GO:2000637)	1/27	0.123093	0.224989	7.96354	16.6822	AGO2
mitotic chromosome condensation (GO:0007076)	1/27	0.123093	0.224989	7.96354	16.6822	CSNK2A1
platelet degranulation (GO:0002576)	2/125	0.12323	0.224989	3.38554	7.08832	TAGLN2;VCL
negative regulation of cellular response to insulin stimulus (GO:1900077)	1/28	0.127351	0.228777	7.66821	15.8027	TSC2
cellular response to epidermal growth factor stimulus (GO:0071364)	1/28	0.127351	0.228777	7.66821	15.8027	SNAI2
regulation of phosphatase activity (GO:0010921)	1/28	0.127351	0.228777	7.66821	15.8027	TSC1
positive regulation of cell communication (GO:0010647)	1/28	0.127351	0.228777	7.66821	15.8027	ILK
histone mRNA metabolic process (GO:0008334)	1/28	0.127351	0.228777	7.66821	15.8027	LSM1
RNA phosphodiester bond hydrolysis (GO:0090501)	1/28	0.127351	0.228777	7.66821	15.8027	CSTF3
macromolecule catabolic process (GO:0009057)	1/28	0.127351	0.228777	7.66821	15.8027	PIK3R4
protein localization to cell surface (GO:0034394)	1/28	0.127351	0.228777	7.66821	15.8027	VCL
protein localization to Golgi apparatus (GO:0034067)	1/28	0.127351	0.228777	7.66821	15.8027	SYS1
regulation of primary metabolic process (GO:0080090)	2/130	0.131327	0.231028	3.25247	6.60271	NCOR1;SP1
regulation of response to external stimulus (GO:0032101)	2/130	0.131327	0.231028	3.25247	6.60271	CASP8;TRAF3
positive regulation of canonical Wnt signaling pathway (GO:0090263)	2/130	0.131327	0.231028	3.25247	6.60271	USP34;ILK
aggrephagy (GO:0035973)	1/29	0.13159	0.231028	7.39397	14.9955	UBE2N
beta-catenin-TCF complex assembly (GO:1904837)	1/29	0.13159	0.231028	7.39397	14.9955	KMT2D
negative regulation of transferase activity (GO:0051348)	1/29	0.13159	0.231028	7.39397	14.9955	NPRL2
establishment of mitotic spindle localization (GO:0040001)	1/29	0.13159	0.231028	7.39397	14.9955	KPNB1
regulation of ubiquitin-protein transferase activity (GO:0051438)	1/29	0.13159	0.231028	7.39397	14.9955	UBE2N
positive regulation of extrinsic apoptotic signaling pathway (GO:2001238)	1/29	0.13159	0.231028	7.39397	14.9955	TRAF2
lamellipodium organization (GO:0097581)	1/29	0.13159	0.231028	7.39397	14.9955	VCL
telomere maintenance via telomerase (GO:0007004)	1/29	0.13159	0.231028	7.39397	14.9955	PTGES3
production of miRNAs involved in gene silencing by miRNA (GO:0035196)	1/29	0.13159	0.231028	7.39397	14.9955	AGO2
protein ADP-ribosylation (GO:0006471)	1/29	0.13159	0.231028	7.39397	14.9955	SIRT6
peptidyl-lysine trimethylation (GO:0018023)	1/30	0.135807	0.234344	7.13865	14.2524	KMT2D
positive regulation of B cell proliferation (GO:0030890)	1/30	0.135807	0.234344	7.13865	14.2524	BCL2
positive regulation of DNA recombination (GO:0045911)	1/30	0.135807	0.234344	7.13865	14.2524	PAXIP1
Golgi to plasma membrane protein transport (GO:0043001)	1/30	0.135807	0.234344	7.13865	14.2524	SYS1
RNA-dependent DNA biosynthetic process (GO:0006278)	1/30	0.135807	0.234344	7.13865	14.2524	PTGES3
ion homeostasis (GO:0050801)	1/30	0.135807	0.234344	7.13865	14.2524	AP3D1
maintenance of blood-brain barrier (GO:0035633)	1/30	0.135807	0.234344	7.13865	14.2524	VCL
primary neural tube formation (GO:0014020)	1/30	0.135807	0.234344	7.13865	14.2524	TSC2
morphogenesis of an epithelium (GO:0002009)	1/30	0.135807	0.234344	7.13865	14.2524	VCL
mRNA splice site selection (GO:0006376)	1/30	0.135807	0.234344	7.13865	14.2524	SRSF5
'de novo' posttranslational protein folding (GO:0051084)	1/31	0.140005	0.237889	6.90035	13.5666	PTGES3
negative regulation of response to biotic stimulus (GO:0002832)	1/31	0.140005	0.237889	6.90035	13.5666	PCBP2
phospholipid translocation (GO:0045332)	1/31	0.140005	0.237889	6.90035	13.5666	TMEM30A
positive regulation of locomotion (GO:0040017)	1/31	0.140005	0.237889	6.90035	13.5666	PPM1F
positive regulation of RNA splicing (GO:0033120)	1/31	0.140005	0.237889	6.90035	13.5666	DYRK1A
tube closure (GO:0060606)	1/31	0.140005	0.237889	6.90035	13.5666	TSC2
positive regulation of ubiquitin-protein transferase activity (GO:0051443)	1/31	0.140005	0.237889	6.90035	13.5666	UBE2N
prostaglandin metabolic process (GO:0006693)	1/31	0.140005	0.237889	6.90035	13.5666	PTGES3
protein acetylation (GO:0006473)	1/31	0.140005	0.237889	6.90035	13.5666	NAA35
protein-containing complex assembly (GO:0065003)	3/267	0.140227	0.237889	2.37415	4.66401	KMT2D;CASP8;TRAF2
cellular calcium ion homeostasis (GO:0006874)	2/136	0.141202	0.238958	3.10589	6.07999	ATP13A1;BCL2
positive regulation of cell migration (GO:0030335)	3/269	0.142465	0.238958	2.35606	4.59117	AGO2;SNAI2;PPM1F
aortic valve morphogenesis (GO:0003180)	1/32	0.144183	0.238958	6.67742	12.932	SNAI2
B cell proliferation (GO:0042100)	1/32	0.144183	0.238958	6.67742	12.932	BCL2
regulation of cellular amide metabolic process (GO:0034248)	1/32	0.144183	0.238958	6.67742	12.932	TSC1
negative regulation of microtubule polymerization or depolymerization (GO:0031111)	1/32	0.144183	0.238958	6.67742	12.932	DYRK1A
regulation of chemotaxis (GO:0050920)	1/32	0.144183	0.238958	6.67742	12.932	PPM1F
ERBB2 signaling pathway (GO:0038128)	1/32	0.144183	0.238958	6.67742	12.932	CUL5
gene silencing by miRNA (GO:0035195)	1/32	0.144183	0.238958	6.67742	12.932	AGO2
hematopoietic progenitor cell differentiation (GO:0002244)	1/32	0.144183	0.238958	6.67742	12.932	PRRC2C
skeletal muscle organ development (GO:0060538)	1/32	0.144183	0.238958	6.67742	12.932	CFLAR
positive regulation of telomere maintenance (GO:0032206)	1/32	0.144183	0.238958	6.67742	12.932	SIRT6
mitochondrial membrane organization (GO:0007006)	1/32	0.144183	0.238958	6.67742	12.932	BCL2
modulation by host of symbiont process (GO:0051851)	1/32	0.144183	0.238958	6.67742	12.932	SP1
protein dephosphorylation (GO:0006470)	2/139	0.146198	0.2419	3.03742	5.84033	STK11;PPM1F
mRNA splicing, via spliceosome (GO:0000398)	3/274	0.148112	0.243442	2.312	4.41544	CSTF3;PCBP2;SRSF5
apoptotic mitochondrial changes (GO:0008637)	1/33	0.14834	0.243442	6.46842	12.3434	BCL2
regulation of histone acetylation (GO:0035065)	1/33	0.14834	0.243442	6.46842	12.3434	PAXIP1
phosphatidylcholine biosynthetic process (GO:0006656)	1/33	0.14834	0.243442	6.46842	12.3434	CSNK2A1
positive regulation of cytokine production involved in immune response (GO:0002720)	1/33	0.14834	0.243442	6.46842	12.3434	TRAF2
positive regulation of cellular catabolic process (GO:0031331)	2/141	0.149549	0.245026	2.99341	5.68788	STK11;NPRL2
DNA metabolic process (GO:0006259)	3/277	0.151535	0.245035	2.28634	4.31419	RPAIN;PTGES3;UBE2N
regulation of amyloid-beta formation (GO:1902003)	1/34	0.152477	0.245035	6.2721	11.7962	SP1
B cell receptor signaling pathway (GO:0050853)	1/34	0.152477	0.245035	6.2721	11.7962	BCL2
regulation of cell adhesion mediated by integrin (GO:0033628)	1/34	0.152477	0.245035	6.2721	11.7962	SNAI2
neural tube closure (GO:0001843)	1/34	0.152477	0.245035	6.2721	11.7962	TSC2
female gamete generation (GO:0007292)	1/34	0.152477	0.245035	6.2721	11.7962	KMT2D
regulation of transmembrane transport (GO:0034762)	1/34	0.152477	0.245035	6.2721	11.7962	BCL2
striated muscle tissue development (GO:0014706)	1/34	0.152477	0.245035	6.2721	11.7962	CFLAR
termination of RNA polymerase II transcription (GO:0006369)	1/34	0.152477	0.245035	6.2721	11.7962	CSTF3
positive regulation of telomerase activity (GO:0051973)	1/34	0.152477	0.245035	6.2721	11.7962	PTGES3
tRNA export from nucleus (GO:0006409)	1/34	0.152477	0.245035	6.2721	11.7962	AAAS
tRNA-containing ribonucleoprotein complex export from nucleus (GO:0071431)	1/34	0.152477	0.245035	6.2721	11.7962	AAAS
regulation of nucleic acid-templated transcription (GO:1903506)	4/430	0.156311	0.250054	1.96648	3.64961	KMT2D;SP1;RFX3;SNAI2
response to estrogen (GO:0043627)	1/35	0.156595	0.250054	6.08732	11.2865	KMT2D
positive regulation of immunoglobulin production (GO:0002639)	1/35	0.156595	0.250054	6.08732	11.2865	PAXIP1
positive regulation of reproductive process (GO:2000243)	1/35	0.156595	0.250054	6.08732	11.2865	AGO2
negative regulation of cellular protein localization (GO:1903828)	1/36	0.160692	0.25141	5.9131	10.8107	DNAJA1
aortic valve development (GO:0003176)	1/36	0.160692	0.25141	5.9131	10.8107	SNAI2
regulation of androgen receptor signaling pathway (GO:0060765)	1/36	0.160692	0.25141	5.9131	10.8107	NCOR1
axonal transport (GO:0098930)	1/36	0.160692	0.25141	5.9131	10.8107	AP3D1
regulation of mRNA processing (GO:0050684)	1/36	0.160692	0.25141	5.9131	10.8107	JMJD6
establishment of protein localization to plasma membrane (GO:0061951)	1/36	0.160692	0.25141	5.9131	10.8107	SYS1
intrinsic apoptotic signaling pathway by p53 class mediator (GO:0072332)	1/36	0.160692	0.25141	5.9131	10.8107	STK11
positive regulation of myeloid leukocyte differentiation (GO:0002763)	1/36	0.160692	0.25141	5.9131	10.8107	CASP8
telomere maintenance via telomere lengthening (GO:0010833)	1/36	0.160692	0.25141	5.9131	10.8107	PTGES3
positive regulation of substrate adhesion-dependent cell spreading (GO:1900026)	1/36	0.160692	0.25141	5.9131	10.8107	ILK
positive regulation of T cell mediated immunity (GO:0002711)	1/36	0.160692	0.25141	5.9131	10.8107	TRAF2
mitochondrion disassembly (GO:0061726)	1/36	0.160692	0.25141	5.9131	10.8107	AMBRA1
Wnt signaling pathway, calcium modulating pathway (GO:0007223)	1/36	0.160692	0.25141	5.9131	10.8107	AGO2
positive regulation of transferase activity (GO:0051347)	2/148	0.161397	0.25212	2.84888	5.19605	PTGES3;UBE2N
positive regulation of programmed cell death (GO:0043068)	3/286	0.161955	0.252599	2.21262	4.02793	DNAJA1;CASP8;SAP18
regulation of intracellular signal transduction (GO:1902531)	4/437	0.162756	0.253455	1.93399	3.51118	STK11;CSNK2A1;TRAF3;TRAF2
anterograde axonal transport (GO:0008089)	1/37	0.16477	0.253842	5.74855	10.3658	AP3D1
negative regulation of stress-activated MAPK cascade (GO:0032873)	1/37	0.16477	0.253842	5.74855	10.3658	NCOR1
phospholipid biosynthetic process (GO:0008654)	1/37	0.16477	0.253842	5.74855	10.3658	GNPAT
regulation of transport (GO:0051049)	1/37	0.16477	0.253842	5.74855	10.3658	DNAJA1
skeletal muscle tissue development (GO:0007519)	1/37	0.16477	0.253842	5.74855	10.3658	CFLAR
tRNA transport (GO:0051031)	1/37	0.16477	0.253842	5.74855	10.3658	AAAS
ncRNA metabolic process (GO:0034660)	1/37	0.16477	0.253842	5.74855	10.3658	AGO2
regulation of cell population proliferation (GO:0042127)	6/764	0.166561	0.256208	1.66531	2.9849	KMT2D;STK11;CSNK2A1;BCL2;TSC2;TSC1
negative regulation of protein phosphorylation (GO:0001933)	2/152	0.168243	0.257726	2.77235	4.94129	TSC2;PPM1F
regulation of phosphoprotein phosphatase activity (GO:0043666)	1/38	0.168829	0.257726	5.59291	9.94905	TSC1
positive regulation of cell development (GO:0010720)	1/38	0.168829	0.257726	5.59291	9.94905	RFX3
lymphocyte proliferation (GO:0046651)	1/38	0.168829	0.257726	5.59291	9.94905	BCL2
positive regulation of signaling (GO:0023056)	1/38	0.168829	0.257726	5.59291	9.94905	ILK
dephosphorylation (GO:0016311)	2/153	0.169963	0.259064	2.75385	4.88031	STK11;PPM1F
negative regulation of cellular metabolic process (GO:0031324)	1/39	0.172868	0.260727	5.44545	9.55801	NCOR1
regulation of cellular component biogenesis (GO:0044087)	1/39	0.172868	0.260727	5.44545	9.55801	TRAF2
regulation of intracellular transport (GO:0032386)	1/39	0.172868	0.260727	5.44545	9.55801	AAAS
odontogenesis (GO:0042476)	1/39	0.172868	0.260727	5.44545	9.55801	BCOR
organophosphate biosynthetic process (GO:0090407)	1/39	0.172868	0.260727	5.44545	9.55801	GNPAT
DNA recombination (GO:0006310)	1/39	0.172868	0.260727	5.44545	9.55801	RPAIN
positive regulation of intracellular transport (GO:0032388)	1/39	0.172868	0.260727	5.44545	9.55801	STK11
autophagy of mitochondrion (GO:0000422)	1/40	0.176887	0.264018	5.30556	9.19052	AMBRA1
negative regulation of I-kappaB kinase/NF-kappaB signaling (GO:0043124)	1/40	0.176887	0.264018	5.30556	9.19052	CASP8
bone development (GO:0060348)	1/40	0.176887	0.264018	5.30556	9.19052	GNAS
negative regulation of protein kinase B signaling (GO:0051898)	1/40	0.176887	0.264018	5.30556	9.19052	TSC2
nucleocytoplasmic transport (GO:0006913)	1/40	0.176887	0.264018	5.30556	9.19052	AAAS
regulation of microtubule polymerization (GO:0031113)	1/40	0.176887	0.264018	5.30556	9.19052	DYRK1A
positive regulation of intrinsic apoptotic signaling pathway (GO:2001244)	1/40	0.176887	0.264018	5.30556	9.19052	BCL2
mRNA processing (GO:0006397)	3/300	0.178578	0.265792	2.10681	3.62946	CSTF3;PCBP2;SRSF5
organonitrogen compound biosynthetic process (GO:1901566)	2/158	0.178604	0.265792	2.66491	4.59054	CSNK2A1;KDSR
protein autophosphorylation (GO:0046777)	2/159	0.180341	0.266431	2.6478	4.53545	STK11;DYRK1A
negative regulation of cell-cell adhesion (GO:0022408)	1/41	0.180887	0.266431	5.17266	8.84463	PPM1F
regulation of mitochondrial membrane potential (GO:0051881)	1/41	0.180887	0.266431	5.17266	8.84463	BCL2
regulation of protein dephosphorylation (GO:0035304)	1/41	0.180887	0.266431	5.17266	8.84463	TSC1
regulation of viral transcription (GO:0046782)	1/41	0.180887	0.266431	5.17266	8.84463	HEXIM1
hexose metabolic process (GO:0019318)	1/41	0.180887	0.266431	5.17266	8.84463	SLC35A2
JNK cascade (GO:0007254)	1/41	0.180887	0.266431	5.17266	8.84463	UBE2N
ATP-dependent chromatin remodeling (GO:0043044)	1/42	0.184868	0.269923	5.04624	8.51863	ARID1A
regulation of chemokine production (GO:0032642)	1/42	0.184868	0.269923	5.04624	8.51863	SNAI2
regulation of DNA recombination (GO:0000018)	1/42	0.184868	0.269923	5.04624	8.51863	SIRT6
regulation of double-strand break repair (GO:2000779)	1/42	0.184868	0.269923	5.04624	8.51863	SIRT6
determination of left/right symmetry (GO:0007368)	1/42	0.184868	0.269923	5.04624	8.51863	RFX3
regulation of ubiquitin-dependent protein catabolic process (GO:2000058)	1/42	0.184868	0.269923	5.04624	8.51863	CSNK2A1
regulation of carbohydrate catabolic process (GO:0043470)	1/43	0.18883	0.272097	4.92584	8.21094	AAAS
cellular response to glucose starvation (GO:0042149)	1/43	0.18883	0.272097	4.92584	8.21094	PIK3R4
negative regulation of type I interferon production (GO:0032480)	1/43	0.18883	0.272097	4.92584	8.21094	PCBP2
development of primary male sexual characteristics (GO:0046546)	1/43	0.18883	0.272097	4.92584	8.21094	CSDE1
regulation of purine nucleotide metabolic process (GO:1900542)	1/43	0.18883	0.272097	4.92584	8.21094	AAAS
positive regulation of neuron differentiation (GO:0045666)	1/43	0.18883	0.272097	4.92584	8.21094	ZEB1
male gonad development (GO:0008584)	1/43	0.18883	0.272097	4.92584	8.21094	CSDE1
myofibril assembly (GO:0030239)	1/43	0.18883	0.272097	4.92584	8.21094	CFLAR
natural killer cell activation (GO:0030101)	1/43	0.18883	0.272097	4.92584	8.21094	CASP8
double-strand break repair (GO:0006302)	2/164	0.189062	0.272097	2.56543	4.27319	PAXIP1;UBE2N
positive regulation of apoptotic process (GO:0043065)	3/310	0.190732	0.273835	2.03715	3.37533	DNAJA1;CASP8;SAP18
negative regulation of canonical Wnt signaling pathway (GO:0090090)	2/165	0.190813	0.273835	2.54956	4.22325	STK11;SNAI2
positive regulation of mRNA catabolic process (GO:0061014)	1/44	0.192772	0.275467	4.81105	7.92016	AGO2
intracellular steroid hormone receptor signaling pathway (GO:0030518)	1/44	0.192772	0.275467	4.81105	7.92016	ARID1A
positive regulation of stress fiber assembly (GO:0051496)	1/44	0.192772	0.275467	4.81105	7.92016	PPM1F
cellular protein-containing complex assembly (GO:0034622)	2/168	0.196081	0.277137	2.50311	4.07814	PTGES3;TRAF2
regulation of DNA repair (GO:0006282)	1/45	0.196696	0.277137	4.70147	7.64504	UBE2N
regulation of insulin receptor signaling pathway (GO:0046626)	1/45	0.196696	0.277137	4.70147	7.64504	TSC2
neural crest cell development (GO:0014032)	1/45	0.196696	0.277137	4.70147	7.64504	SNAI2
chromosome condensation (GO:0030261)	1/45	0.196696	0.277137	4.70147	7.64504	CSNK2A1
positive regulation of chemotaxis (GO:0050921)	1/45	0.196696	0.277137	4.70147	7.64504	PPM1F
positive regulation of RNA metabolic process (GO:0051254)	1/45	0.196696	0.277137	4.70147	7.64504	DYRK1A
microtubule bundle formation (GO:0001578)	1/45	0.196696	0.277137	4.70147	7.64504	AAAS
zymogen activation (GO:0031638)	1/45	0.196696	0.277137	4.70147	7.64504	CASP8
protein deacetylation (GO:0006476)	1/45	0.196696	0.277137	4.70147	7.64504	SIRT6
positive regulation of cell population proliferation (GO:0008284)	4/474	0.198337	0.278351	1.77836	2.87701	KMT2D;CSNK2A1;BCL2;SIRT6
regulation of B cell proliferation (GO:0030888)	1/46	0.200601	0.278351	4.59676	7.38441	BCL2
regulation of cellular protein localization (GO:1903827)	1/46	0.200601	0.278351	4.59676	7.38441	PPM1F
regulation of DNA metabolic process (GO:0051052)	1/46	0.200601	0.278351	4.59676	7.38441	UBE2N
regulation of double-strand break repair via homologous recombination (GO:0010569)	1/46	0.200601	0.278351	4.59676	7.38441	SIRT6
regulation of telomerase activity (GO:0051972)	1/46	0.200601	0.278351	4.59676	7.38441	PTGES3
positive regulation of organelle assembly (GO:1902117)	1/46	0.200601	0.278351	4.59676	7.38441	CNOT2
spliceosomal complex assembly (GO:0000245)	1/46	0.200601	0.278351	4.59676	7.38441	SRSF5
positive regulation of response to stimulus (GO:0048584)	1/46	0.200601	0.278351	4.59676	7.38441	ILK
postreplication repair (GO:0006301)	1/46	0.200601	0.278351	4.59676	7.38441	UBE2N
posttranscriptional regulation of gene expression (GO:0010608)	1/46	0.200601	0.278351	4.59676	7.38441	TSC1
proteasome-mediated ubiquitin-dependent protein catabolic process (GO:0043161)	3/321	0.204338	0.2818	1.96558	3.12129	SHARPIN;CUL5;PCBP2
negative regulation of cold-induced thermogenesis (GO:0120163)	1/47	0.204487	0.2818	4.4966	7.13724	STK11
epithelial to mesenchymal transition (GO:0001837)	1/47	0.204487	0.2818	4.4966	7.13724	SNAI2
histone deacetylation (GO:0016575)	1/47	0.204487	0.2818	4.4966	7.13724	SIRT6
telomere organization (GO:0032200)	1/47	0.204487	0.2818	4.4966	7.13724	PTGES3
negative regulation of gene expression (GO:0010629)	3/322	0.205587	0.282867	1.95931	3.09942	NCOR1;AGO2;TSC1
positive regulation of gene expression (GO:0010628)	4/482	0.206331	0.282867	1.74787	2.75862	SP1;AGO2;DYRK1A;PPM1F
negative regulation of MAP kinase activity (GO:0043407)	1/48	0.208354	0.282867	4.40071	6.90258	DNAJA1
cellular response to ionizing radiation (GO:0071479)	1/48	0.208354	0.282867	4.40071	6.90258	TLK2
regulation of interleukin-2 production (GO:0032663)	1/48	0.208354	0.282867	4.40071	6.90258	TRAF2
phosphatidic acid biosynthetic process (GO:0006654)	1/48	0.208354	0.282867	4.40071	6.90258	GNPAT
regulation of protein metabolic process (GO:0051246)	1/48	0.208354	0.282867	4.40071	6.90258	TRAF3
positive regulation of blood vessel endothelial cell migration (GO:0043536)	1/48	0.208354	0.282867	4.40071	6.90258	SP1
positive regulation of DNA repair (GO:0045739)	1/48	0.208354	0.282867	4.40071	6.90258	UBE2N
Golgi to plasma membrane transport (GO:0006893)	1/48	0.208354	0.282867	4.40071	6.90258	SYS1
substrate adhesion-dependent cell spreading (GO:0034446)	1/48	0.208354	0.282867	4.40071	6.90258	ILK
positive regulation of developmental process (GO:0051094)	2/177	0.211987	0.285015	2.37329	3.68152	PAXIP1;AGO2
negative regulation of catabolic process (GO:0009895)	1/49	0.212203	0.285015	4.30881	6.67957	NCOR1
adherens junction organization (GO:0034332)	1/49	0.212203	0.285015	4.30881	6.67957	VCL
regulation of cellular localization (GO:0060341)	1/49	0.212203	0.285015	4.30881	6.67957	PPM1F
regulation of cellular protein metabolic process (GO:0032268)	1/49	0.212203	0.285015	4.30881	6.67957	TSC1
cellular response to mechanical stimulus (GO:0071260)	1/49	0.212203	0.285015	4.30881	6.67957	CASP8
regulation of interferon-beta production (GO:0032648)	1/49	0.212203	0.285015	4.30881	6.67957	TRAF3
response to unfolded protein (GO:0006986)	1/49	0.212203	0.285015	4.30881	6.67957	DNAJA1
protein stabilization (GO:0050821)	2/179	0.21554	0.288235	2.34624	3.60055	PTGES3;TSC1
regulation of immune response (GO:0050776)	2/179	0.21554	0.288235	2.34624	3.60055	CASP8;TRAF3
regulation of generation of precursor metabolites and energy (GO:0043467)	1/50	0.216033	0.288235	4.22066	6.46742	AAAS
phosphatidic acid metabolic process (GO:0046473)	1/50	0.216033	0.288235	4.22066	6.46742	GNPAT
positive regulation of cell morphogenesis involved in differentiation (GO:0010770)	1/50	0.216033	0.288235	4.22066	6.46742	ILK
regulated exocytosis (GO:0045055)	2/180	0.217319	0.288726	2.33294	3.56097	TAGLN2;VCL
regulation of epithelial cell migration (GO:0010632)	1/51	0.219845	0.288726	4.13604	6.26541	PPM1F
negative regulation of protein ubiquitination (GO:0031397)	1/51	0.219845	0.288726	4.13604	6.26541	DNAJA1
negative regulation of transport (GO:0051051)	1/51	0.219845	0.288726	4.13604	6.26541	PPM1F
positive regulation of actin filament bundle assembly (GO:0032233)	1/51	0.219845	0.288726	4.13604	6.26541	PPM1F
regulation of substrate adhesion-dependent cell spreading (GO:1900024)	1/51	0.219845	0.288726	4.13604	6.26541	ILK
gonad development (GO:0008406)	1/51	0.219845	0.288726	4.13604	6.26541	CSDE1
sensory perception (GO:0007600)	1/51	0.219845	0.288726	4.13604	6.26541	GNAS
mesenchymal cell differentiation (GO:0048762)	1/51	0.219845	0.288726	4.13604	6.26541	SNAI2
mitotic metaphase plate congression (GO:0007080)	1/51	0.219845	0.288726	4.13604	6.26541	KPNB1
mitotic nuclear membrane organization (GO:0101024)	1/51	0.219845	0.288726	4.13604	6.26541	KPNB1
mitotic nuclear membrane reassembly (GO:0007084)	1/51	0.219845	0.288726	4.13604	6.26541	KPNB1
negative regulation of cellular biosynthetic process (GO:0031327)	1/52	0.223638	0.291803	4.05474	6.07289	SNAI2
response to peptide hormone (GO:0043434)	1/52	0.223638	0.291803	4.05474	6.07289	TSC1
signal transduction in response to DNA damage (GO:0042770)	1/52	0.223638	0.291803	4.05474	6.07289	PAXIP1
sprouting angiogenesis (GO:0002040)	1/52	0.223638	0.291803	4.05474	6.07289	JMJD6
protein homotetramerization (GO:0051289)	1/52	0.223638	0.291803	4.05474	6.07289	TK1
antigen receptor-mediated signaling pathway (GO:0050851)	2/185	0.226232	0.294805	2.26862	3.37161	BCL2;UBE2N
negative regulation of cysteine-type endopeptidase activity (GO:2000117)	1/53	0.227413	0.295197	3.97656	5.88923	CSNK2A1
positive regulation of macroautophagy (GO:0016239)	1/53	0.227413	0.295197	3.97656	5.88923	TSC2
positive regulation of NIK/NF-kappaB signaling (GO:1901224)	1/53	0.227413	0.295197	3.97656	5.88923	ILK
regulation of alternative mRNA splicing, via spliceosome (GO:0000381)	1/54	0.23117	0.298533	3.90134	5.7139	SAP18
nuclear membrane reassembly (GO:0031468)	1/54	0.23117	0.298533	3.90134	5.7139	KPNB1
regulation of megakaryocyte differentiation (GO:0045652)	1/54	0.23117	0.298533	3.90134	5.7139	KMT2D
cytoplasmic microtubule organization (GO:0031122)	1/54	0.23117	0.298533	3.90134	5.7139	KPNB1
protein sumoylation (GO:0016925)	1/55	0.234909	0.301427	3.8289	5.54637	AAAS
negative regulation of cysteine-type endopeptidase activity involved in apoptotic process (GO:0043154)	1/55	0.234909	0.301427	3.8289	5.54637	CSNK2A1
regulation of blood vessel endothelial cell migration (GO:0043535)	1/55	0.234909	0.301427	3.8289	5.54637	SP1
negative regulation of protein modification by small protein conjugation or removal (GO:1903321)	1/55	0.234909	0.301427	3.8289	5.54637	DNAJA1
positive regulation of response to DNA damage stimulus (GO:2001022)	1/55	0.234909	0.301427	3.8289	5.54637	UBE2N
regulation of ATP metabolic process (GO:1903578)	1/56	0.23863	0.303109	3.75909	5.38618	AAAS
autophagosome organization (GO:1905037)	1/56	0.23863	0.303109	3.75909	5.38618	AMBRA1
negative regulation of metabolic process (GO:0009892)	1/56	0.23863	0.303109	3.75909	5.38618	STK11
DNA damage response, signal transduction by p53 class mediator resulting in cell cycle arrest (GO:0006977)	1/56	0.23863	0.303109	3.75909	5.38618	CNOT2
peptidyl-tyrosine modification (GO:0018212)	1/56	0.23863	0.303109	3.75909	5.38618	DYRK1A
positive regulation of interleukin-1 beta production (GO:0032731)	1/56	0.23863	0.303109	3.75909	5.38618	CASP8
telomere maintenance (GO:0000723)	1/56	0.23863	0.303109	3.75909	5.38618	PTGES3
mitochondrial transport (GO:0006839)	1/56	0.23863	0.303109	3.75909	5.38618	BCL2
arachidonic acid metabolic process (GO:0019369)	1/57	0.242333	0.306265	3.69178	5.23288	PTGES3
regulation of bone mineralization (GO:0030500)	1/57	0.242333	0.306265	3.69178	5.23288	BCOR
positive regulation of gene expression, epigenetic (GO:0045815)	1/57	0.242333	0.306265	3.69178	5.23288	ARID1A
positive regulation of proteolysis (GO:0045862)	1/57	0.242333	0.306265	3.69178	5.23288	CASP8
receptor metabolic process (GO:0043112)	1/58	0.246018	0.308982	3.62683	5.08608	PIK3R4
autophagosome assembly (GO:0000045)	1/58	0.246018	0.308982	3.62683	5.08608	AMBRA1
regulation of calcium ion transport (GO:0051924)	1/58	0.246018	0.308982	3.62683	5.08608	BCL2
RNA modification (GO:0009451)	1/58	0.246018	0.308982	3.62683	5.08608	JMJD6
membrane lipid biosynthetic process (GO:0046467)	1/58	0.246018	0.308982	3.62683	5.08608	KDSR
gene expression (GO:0010467)	3/356	0.248962	0.312289	1.76752	2.45767	AGO2;SRSF5;AAAS
phospholipid transport (GO:0015914)	1/59	0.249686	0.312807	3.56412	4.9454	TMEM30A
endomembrane system organization (GO:0010256)	2/199	0.251314	0.314455	2.1059	2.90836	VPS51;AP3D1
apical junction assembly (GO:0043297)	1/60	0.253336	0.315806	3.50353	4.81049	VCL
cellular protein catabolic process (GO:0044257)	1/60	0.253336	0.315806	3.50353	4.81049	CASP8
Notch signaling pathway (GO:0007219)	1/60	0.253336	0.315806	3.50353	4.81049	SNAI2
modification-dependent protein catabolic process (GO:0019941)	2/201	0.254907	0.316979	2.08453	2.84925	KEAP1;RNF7
ncRNA processing (GO:0034470)	2/201	0.254907	0.316979	2.08453	2.84925	AGO2;INTS10
regulation of endocytosis (GO:0030100)	1/61	0.256968	0.318362	3.44497	4.68103	TSC2
pattern recognition receptor signaling pathway (GO:0002221)	1/61	0.256968	0.318362	3.44497	4.68103	TRAF3
positive regulation of DNA biosynthetic process (GO:2000573)	1/61	0.256968	0.318362	3.44497	4.68103	PTGES3
regulation of angiogenesis (GO:0045765)	2/203	0.258501	0.319867	2.06358	2.79172	SP1;AGO2
positive regulation of interleukin-1 production (GO:0032732)	1/62	0.260583	0.321652	3.38832	4.55673	CASP8
stress-activated MAPK cascade (GO:0051403)	1/62	0.260583	0.321652	3.38832	4.55673	UBE2N
proteasomal protein catabolic process (GO:0010498)	2/205	0.262096	0.323123	2.04304	2.73572	SHARPIN;PCBP2
cell cycle G1/S phase transition (GO:0044843)	1/63	0.26418	0.325294	3.3335	4.43731	CUL5
regulation of innate immune response (GO:0045088)	1/64	0.26776	0.328897	3.28042	4.3225	CASP8
regulation of transcription initiation from RNA polymerase II promoter (GO:0060260)	1/64	0.26776	0.328897	3.28042	4.3225	PAXIP1
regulation of RNA metabolic process (GO:0051252)	1/65	0.271323	0.332057	3.229	4.21206	PCBP2
mitotic G1 DNA damage checkpoint signaling (GO:0031571)	1/65	0.271323	0.332057	3.229	4.21206	CNOT2
protein autoubiquitination (GO:0051865)	1/65	0.271323	0.332057	3.229	4.21206	TRAF2
cell-cell junction assembly (GO:0007043)	1/66	0.274868	0.334767	3.17917	4.10578	VCL
cellular response to nutrient levels (GO:0031669)	1/66	0.274868	0.334767	3.17917	4.10578	TSC1
regulation of protein localization (GO:0032880)	1/66	0.274868	0.334767	3.17917	4.10578	PPM1F
ERBB signaling pathway (GO:0038127)	1/66	0.274868	0.334767	3.17917	4.10578	CUL5
negative regulation of multicellular organismal process (GO:0051241)	2/214	0.278275	0.337837	1.95541	2.50125	STK11;SFMBT1
anion transmembrane transport (GO:0098656)	1/67	0.278397	0.337837	3.13084	4.00343	SLC35A2
positive regulation of catabolic process (GO:0009896)	1/67	0.278397	0.337837	3.13084	4.00343	CSNK2A1
negative regulation of cell population proliferation (GO:0008285)	3/379	0.279067	0.338243	1.65745	2.11541	STK11;TSC2;TSC1
regulation of myeloid cell differentiation (GO:0045637)	1/68	0.281908	0.341275	3.08396	3.90482	KMT2D
cellular response to decreased oxygen levels (GO:0036294)	1/69	0.285403	0.344166	3.03845	3.80977	TSC1
peptidyl-tyrosine phosphorylation (GO:0018108)	1/69	0.285403	0.344166	3.03845	3.80977	DYRK1A
positive regulation of MAP kinase activity (GO:0043406)	1/69	0.285403	0.344166	3.03845	3.80977	TRAF2
positive regulation of macromolecule metabolic process (GO:0010604)	3/384	0.285665	0.344166	1.63528	2.0489	SP1;AGO2;PPM1F
carbohydrate homeostasis (GO:0033500)	1/70	0.288881	0.346381	2.99426	3.7181	STK11
negative regulation of viral process (GO:0048525)	1/70	0.288881	0.346381	2.99426	3.7181	HEXIM1
DNA-templated transcription, termination (GO:0006353)	1/70	0.288881	0.346381	2.99426	3.7181	CSTF3
wound healing (GO:0042060)	1/70	0.288881	0.346381	2.99426	3.7181	CFLAR
positive regulation of cell motility (GO:2000147)	2/221	0.290848	0.348325	1.89224	2.33683	SNAI2;PPM1F
protein tetramerization (GO:0051262)	1/71	0.292342	0.348455	2.95134	3.62965	TK1
negative regulation of neuron apoptotic process (GO:0043524)	1/71	0.292342	0.348455	2.95134	3.62965	BCL2
response to metal ion (GO:0010038)	1/71	0.292342	0.348455	2.95134	3.62965	BCL2
myeloid leukocyte differentiation (GO:0002573)	1/71	0.292342	0.348455	2.95134	3.62965	CASP8
negative regulation of cellular process (GO:0048523)	4/566	0.294886	0.350484	1.4802	1.80757	STK11;BCL2;TSC2;TSC1
negative regulation of epithelial cell proliferation (GO:0050680)	1/72	0.295786	0.350484	2.90962	3.54427	SNAI2
cell junction organization (GO:0034330)	1/72	0.295786	0.350484	2.90962	3.54427	ILK
cell morphogenesis involved in differentiation (GO:0000904)	1/72	0.295786	0.350484	2.90962	3.54427	ILK
negative regulation of supramolecular fiber organization (GO:1902904)	1/72	0.295786	0.350484	2.90962	3.54427	DYRK1A
negative regulation of cell adhesion (GO:0007162)	1/73	0.299214	0.354128	2.86907	3.46181	SNAI2
proteolysis involved in cellular protein catabolic process (GO:0051603)	1/74	0.302625	0.356488	2.82962	3.38214	CASP8
NIK/NF-kappaB signaling (GO:0038061)	1/74	0.302625	0.356488	2.82962	3.38214	TRAF2
regulation of peptide hormone secretion (GO:0090276)	1/74	0.302625	0.356488	2.82962	3.38214	RFX3
sphingolipid biosynthetic process (GO:0030148)	1/74	0.302625	0.356488	2.82962	3.38214	KDSR
nucleic acid phosphodiester bond hydrolysis (GO:0090305)	1/75	0.30602	0.359225	2.79124	3.30513	EDC4
positive regulation of lymphocyte proliferation (GO:0050671)	1/75	0.30602	0.359225	2.79124	3.30513	BCL2
integrin-mediated signaling pathway (GO:0007229)	1/75	0.30602	0.359225	2.79124	3.30513	ILK
regulation of cell division (GO:0051302)	1/76	0.309398	0.361924	2.75389	3.23066	PIK3R4
phospholipid metabolic process (GO:0006644)	1/76	0.309398	0.361924	2.75389	3.23066	GNPAT
RNA transport (GO:0050658)	1/76	0.309398	0.361924	2.75389	3.23066	SRSF5
negative regulation of developmental process (GO:0051093)	1/77	0.312761	0.364163	2.71752	3.15862	SFMBT1
cellular response to UV (GO:0034644)	1/77	0.312761	0.364163	2.71752	3.15862	STK11
phosphatidylcholine metabolic process (GO:0046470)	1/77	0.312761	0.364163	2.71752	3.15862	CSNK2A1
positive regulation of protein modification by small protein conjugation or removal (GO:1903322)	1/77	0.312761	0.364163	2.71752	3.15862	PAXIP1
negative regulation of protein serine/threonine kinase activity (GO:0071901)	1/78	0.316107	0.367634	2.68209	3.0889	HEXIM1
regulation of cell migration (GO:0030334)	3/408	0.317487	0.368813	1.53649	1.76284	SNAI2;VCL;PPM1F
recombinational repair (GO:0000725)	1/79	0.319436	0.369371	2.64757	3.0214	UBE2N
negative regulation of NF-kappaB transcription factor activity (GO:0032088)	1/79	0.319436	0.369371	2.64757	3.0214	TRAF3
regulation of neuron differentiation (GO:0045664)	1/79	0.319436	0.369371	2.64757	3.0214	ZEB1
positive regulation of ubiquitin-dependent protein catabolic process (GO:2000060)	1/79	0.319436	0.369371	2.64757	3.0214	KEAP1
negative regulation of cell cycle (GO:0045786)	1/80	0.32275	0.371495	2.61392	2.95602	HEXIM1
regulation of NIK/NF-kappaB signaling (GO:1901222)	1/80	0.32275	0.371495	2.61392	2.95602	ILK
positive regulation of cell adhesion (GO:0045785)	1/80	0.32275	0.371495	2.61392	2.95602	PPM1F
lipid biosynthetic process (GO:0008610)	1/80	0.32275	0.371495	2.61392	2.95602	GNPAT
positive regulation of cellular amide metabolic process (GO:0034250)	1/81	0.326048	0.374862	2.58112	2.89269	SP1
regulation of cyclin-dependent protein serine/threonine kinase activity (GO:0000079)	1/82	0.32933	0.378203	2.54913	2.8313	HEXIM1
regulation of interleukin-1 beta production (GO:0032651)	1/83	0.332596	0.381084	2.51791	2.77178	CASP8
regulation of osteoblast differentiation (GO:0045667)	1/83	0.332596	0.381084	2.51791	2.77178	SNAI2
regulation of cytokinesis (GO:0032465)	1/84	0.335847	0.383498	2.48745	2.71406	PIK3R4
nuclear export (GO:0051168)	1/84	0.335847	0.383498	2.48745	2.71406	SRSF5
response to insulin (GO:0032868)	1/84	0.335847	0.383498	2.48745	2.71406	TSC1
G1/S transition of mitotic cell cycle (GO:0000082)	1/85	0.339081	0.385878	2.45771	2.65805	CUL5
retrograde vesicle-mediated transport, Golgi to endoplasmic reticulum (GO:0006890)	1/85	0.339081	0.385878	2.45771	2.65805	RER1
positive regulation of protein catabolic process (GO:0045732)	1/85	0.339081	0.385878	2.45771	2.65805	CSNK2A1
negative regulation of cellular amide metabolic process (GO:0034249)	1/86	0.3423	0.387786	2.42868	2.6037	TSC1
glucose homeostasis (GO:0042593)	1/86	0.3423	0.387786	2.42868	2.6037	STK11
positive regulation of endothelial cell migration (GO:0010595)	1/86	0.3423	0.387786	2.42868	2.6037	SP1
positive regulation of proteasomal protein catabolic process (GO:1901800)	1/86	0.3423	0.387786	2.42868	2.6037	KEAP1
positive regulation of signal transduction (GO:0009967)	2/252	0.34607	0.391615	1.65499	1.75613	CSNK2A1;ILK
positive regulation of phosphorylation (GO:0042327)	2/253	0.347832	0.393167	1.64831	1.74068	PTGES3;ILK
sensory perception of mechanical stimulus (GO:0050954)	1/88	0.348692	0.393697	2.37261	2.4997	SNAI2
SCF-dependent proteasomal ubiquitin-dependent protein catabolic process (GO:0031146)	1/89	0.351865	0.396834	2.34553	2.44992	CUL5
protein complex oligomerization (GO:0051259)	1/90	0.355023	0.399947	2.31905	2.40155	JMJD6
sensory perception of sound (GO:0007605)	1/91	0.358165	0.403036	2.29317	2.35454	SNAI2
positive regulation of cellular process (GO:0048522)	4/625	0.359861	0.404492	1.33548	1.36491	KMT2D;CSNK2A1;BCL2;EIF4G2
T cell activation (GO:0042110)	1/92	0.361292	0.404744	2.26786	2.30883	CASP8
positive regulation of transmembrane receptor protein serine/threonine kinase signaling pathway (GO:0090100)	1/92	0.361292	0.404744	2.26786	2.30883	STK11
Wnt signaling pathway (GO:0016055)	1/92	0.361292	0.404744	2.26786	2.30883	USP34
cellular component assembly (GO:0022607)	2/261	0.361872	0.404943	1.59675	1.62304	ILK;TRAF2
negative regulation of cell death (GO:0060548)	1/94	0.367501	0.408064	2.21886	2.22115	TRAF2
negative regulation of cellular protein metabolic process (GO:0032269)	1/94	0.367501	0.408064	2.21886	2.22115	TSC1
regulation of kinase activity (GO:0043549)	1/94	0.367501	0.408064	2.21886	2.22115	NPRL2
nucleosome organization (GO:0034728)	1/94	0.367501	0.408064	2.21886	2.22115	ARID1A
positive regulation of epithelial cell migration (GO:0010634)	1/94	0.367501	0.408064	2.21886	2.22115	PPM1F
hemopoiesis (GO:0030097)	1/94	0.367501	0.408064	2.21886	2.22115	PRRC2C
interleukin-1-mediated signaling pathway (GO:0070498)	1/94	0.367501	0.408064	2.21886	2.22115	UBE2N
regulation of vesicle-mediated transport (GO:0060627)	1/96	0.37365	0.414435	2.17193	2.13812	TSC2
protein maturation (GO:0051604)	1/97	0.376703	0.416443	2.1492	2.09826	NAA35
calcium ion homeostasis (GO:0055074)	1/97	0.376703	0.416443	2.1492	2.09826	ATP13A1
double-strand break repair via homologous recombination (GO:0000724)	1/97	0.376703	0.416443	2.1492	2.09826	UBE2N
antigen processing and presentation of exogenous peptide antigen via MHC class II (GO:0019886)	1/98	0.379741	0.417964	2.12693	2.05944	AP1M1
regulation of neuron apoptotic process (GO:0043523)	1/98	0.379741	0.417964	2.12693	2.05944	BCL2
regulation of peptidyl-serine phosphorylation (GO:0033135)	1/98	0.379741	0.417964	2.12693	2.05944	PPM1F
RNA splicing (GO:0008380)	1/98	0.379741	0.417964	2.12693	2.05944	LSM1
organic anion transport (GO:0015711)	1/99	0.382764	0.420371	2.10512	2.02163	SLC35A2
sensory perception of chemical stimulus (GO:0007606)	1/99	0.382764	0.420371	2.10512	2.02163	GNAS
antigen processing and presentation of peptide antigen via MHC class II (GO:0002495)	1/100	0.385772	0.422292	2.08375	1.98479	AP1M1
regulation of transforming growth factor beta receptor signaling pathway (GO:0017015)	1/100	0.385772	0.422292	2.08375	1.98479	STK11
positive regulation of translation (GO:0045727)	1/100	0.385772	0.422292	2.08375	1.98479	AGO2
cellular response to chemical stress (GO:0062197)	1/101	0.388766	0.424646	2.06281	1.9489	KEAP1
epithelial cell differentiation (GO:0030855)	1/101	0.388766	0.424646	2.06281	1.9489	TAGLN2
plasma membrane bounded cell projection assembly (GO:0120031)	2/278	0.391328	0.42559	1.4971	1.40459	RFX3;VCL
regulation of cell death (GO:0010941)	1/102	0.391746	0.42559	2.04229	1.91391	TSC1
cell junction assembly (GO:0034329)	1/102	0.391746	0.42559	2.04229	1.91391	ILK
regulation of protein catabolic process (GO:0042176)	1/102	0.391746	0.42559	2.04229	1.91391	CSNK2A1
positive regulation of cellular protein metabolic process (GO:0032270)	1/102	0.391746	0.42559	2.04229	1.91391	CASP8
antigen processing and presentation of exogenous peptide antigen (GO:0002478)	1/103	0.394711	0.427887	2.02216	1.87981	AP1M1
chromatin remodeling (GO:0006338)	1/103	0.394711	0.427887	2.02216	1.87981	ARID1A
cellular metal ion homeostasis (GO:0006875)	1/104	0.397662	0.430159	2.00243	1.84655	ATP13A1
regulation of insulin secretion (GO:0050796)	1/104	0.397662	0.430159	2.00243	1.84655	RFX3
activation of GTPase activity (GO:0090630)	1/105	0.400598	0.43287	1.98307	1.81411	TSC1
regulation of phosphatidylinositol 3-kinase signaling (GO:0014066)	1/106	0.403521	0.43556	1.96409	1.78246	TSC2
proteolysis (GO:0006508)	2/287	0.406683	0.438503	1.44916	1.30384	CASP8;SENP1
DNA replication (GO:0006260)	1/108	0.409323	0.440877	1.92718	1.72145	RPAIN
response to tumor necrosis factor (GO:0034612)	1/110	0.41507	0.44627	1.89163	1.66332	CASP8
cellular response to cytokine stimulus (GO:0071345)	3/482	0.415217	0.44627	1.29419	1.13753	ZEB1;BCL2;MCL1
cellular divalent inorganic cation homeostasis (GO:0072503)	1/111	0.417923	0.448698	1.87434	1.63528	ATP13A1
[truncated: 69 more rows]
